# Supplementary material for: Cu(ii)-Catalyzed C2-site functionalization of p-aminophenols: an approach for selective cross-dehydrogenative aminations
Source: Royal Society of Chemistry journal article supplement (doi:10.1039/d1qo01675j), 2021-12-23

# Cu-Catalyzed Site-Selective Cross-Dehydrogenative Aminations: An Approach of C2-Site Functionalization to *p*-Aminophenols

Xin Zhao,<sup>ac</sup> Fang Yang,<sup>a</sup> Lin-Lin Wang,<sup>a</sup> Jing Guo,<sup>a</sup> Yu-Qin Xu,<sup>a</sup> Zi-Sheng Chen,<sup>a</sup> Kegong Ji<sup>ab\*</sup>

<sup>a</sup> College of Chemistry and Pharmacy, Northwest A&F University, 3 Taicheng Road, Yangling, 712100, Shaanxi, P. R. China.

<sup>b</sup> Guangdong Provincial Key Laboratory of Catalysis, Southern University of Science and Technology, Shenzhen 518055, China.

<sup>c</sup> School of Pharmacy, Baotou Medical College, Baotou 014060, Inner Mongolia, P. R. China

## Contents

|                                                                  |    |
|------------------------------------------------------------------|----|
| 1. General Information .....                                     | 2  |
| 2. Screening Conditions .....                                    | 2  |
| 3. Preparation of Starting Materials .....                       | 4  |
| 4. General Reaction Procedure .....                              | 5  |
| 5. Mechanistic Study.....                                        | 6  |
| 6. Characterization of Compounds and X-ray Structure of 5a. .... | 9  |
| 7. References .....                                              | 20 |
| 8. NMR Spectra .....                                             | 20 |

## 1. General Information

Unless otherwise noted, all reactions were carried out in a flamedried, sealed Schlenk reaction tube under an air conditions. Materials, unless otherwise noted, were purchased from Energy Chemical. Solvents were purchased from Tansoole. Solvents were purified by standard procedures as specified in Purification of Laboratory Chemicals, 4th Ed (W. L. F. Armarego, D. D. Perrin, Butterworth-Heinemann: 1997). Analytical thin layer chromatography (TLC) was performed on silica gel plates with F-254 indicator and compounds were visualized by irradiation with UV (254 and 365 nm) light. Flash column chromatography was carried out using silica gel (200-300 mesh) at increased pressure.  $^1\text{H}$  NMR and  $^{13}\text{C}$  NMR spectra were recorded on a Bruker Advance spectrometer at 500 MHz ( $^1\text{H}$ , 500 MHz;  $^{13}\text{C}$ , 125 MHz) or Bruker Advance spectrometer at 400MHz ( $^1\text{H}$ , 400 MHz;  $^{13}\text{C}$ , 100 MHz). Chemical shift values are reported in  $\delta$  (ppm) relative to  $\text{CHCl}_3$  ( $^1\text{H}$  NMR,  $\delta = 7.26$ ;  $^{13}\text{C}$  NMR,  $\delta = 77.16$ ) or methanol ( $^1\text{H}$  NMR,  $\delta = 3.31$ ;  $^{13}\text{C}$  NMR,  $\delta = 49.00$ ). Signal shapes are shown as s (singlet), d (doublet), t (triplet), dd (doublet of doublets), td (triplet double), m (multiplet). High resolution mass spectrometry (HRMS) was performed with a Thermo Scientific LTQ Orbitrap XL. Among them, **3a-3t** and **5a** were analyzed by KeeCloud Biotech; and the parts of Mechanism were analyzed by Life science Research Core Services of NWAUFU.

## 2. Screening Conditions

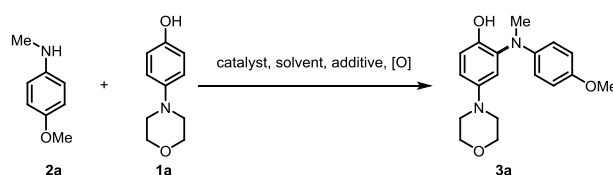

All of the conditions screening reactions were carried out under room temperature. **2a** (0.33 mmol), **1a** (0.3 mmol), catalysts, solvents, additives and oxidants were selected as described.

**Table S1 Screening of catalysts<sup>a</sup>**

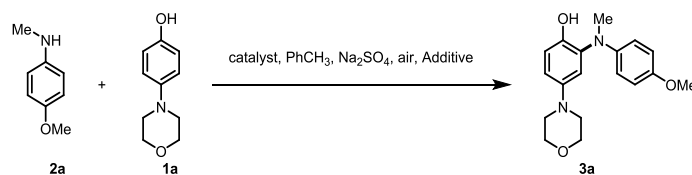

| Entry | Catalyst (mol%)                   | Additive (eq.)               | Oxidant | Solvent         | Time (h) | Yield(%) <sup>b</sup> |
|-------|-----------------------------------|------------------------------|---------|-----------------|----------|-----------------------|
| 1     | -                                 | $\text{Na}_2\text{SO}_4$ (2) | Air     | $\text{PhCH}_3$ | 10       | 0                     |
| 2     | $\text{Cu}(\text{OAc})_2$ (10)    | $\text{Na}_2\text{SO}_4$ (2) | Air     | $\text{PhCH}_3$ | 10       | 10                    |
| 3     | $\text{Cu}(\text{OTf})_2$ (10)    | $\text{Na}_2\text{SO}_4$ (2) | Air     | $\text{PhCH}_3$ | 10       | 33                    |
| 4     | $\text{Fe}(\text{OTf})_3$ (10)    | $\text{Na}_2\text{SO}_4$ (2) | Air     | $\text{PhCH}_3$ | 10       | 30                    |
| 5     | $\text{CuCl}$ (10)                | $\text{Na}_2\text{SO}_4$ (2) | Air     | $\text{PhCH}_3$ | 10       | 14                    |
| 6     | $\text{CuI}$                      | $\text{Na}_2\text{SO}_4$ (2) | Air     | $\text{PhCH}_3$ | 10       | 12                    |
| 7     | $\text{CuOTf}$                    | $\text{Na}_2\text{SO}_4$ (2) | Air     | $\text{PhCH}_3$ | 10       | 24                    |
| 8     | $\text{CuCl}_2$                   | $\text{Na}_2\text{SO}_4$ (2) | Air     | $\text{PhCH}_3$ | 10       | 17                    |
| 9     | $\text{Cu-TMEDA}$<br>Catalyst(10) | $\text{Na}_2\text{SO}_4$ (2) | Air     | $\text{PhCH}_3$ | 7        | 5<                    |
| 10    | $\text{Cu}(\text{OTf})_2$ (15)    | $\text{Na}_2\text{SO}_4$ (2) | Air     | $\text{PhCH}_3$ | 7        | 50                    |

|    |                           |                                     |     |                   |   |    |
|----|---------------------------|-------------------------------------|-----|-------------------|---|----|
| 11 | Cu(OTf) <sub>2</sub> (20) | Na <sub>2</sub> SO <sub>4</sub> (2) | Air | PhCH <sub>3</sub> | 7 | 32 |
| 12 | Cu-TMEDA<br>Catalyst(15)  | Na <sub>2</sub> SO <sub>4</sub> (2) | Air | PhCH <sub>3</sub> | 7 | 5< |

<sup>a</sup> Reaction conditions: **2a** (0.33 mmol), **1a** (0.3 mmol), solvent (3 mL). <sup>b</sup> Isolated yields.

**Table S2 Optimization of the additives<sup>a</sup>**

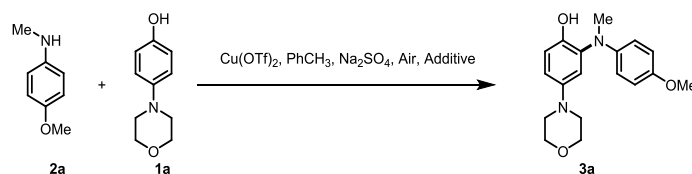

| Entry          | Catalyst (mol%)           | Additive (eq.)                                                  | Oxidant | Solvent           | Time (h) | Yield (%) <sup>b</sup> |
|----------------|---------------------------|-----------------------------------------------------------------|---------|-------------------|----------|------------------------|
| 1              | Cu(OTf) <sub>2</sub> (15) | Na <sub>2</sub> SO <sub>4</sub> (2) + En.(0.15)                 | Air     | PhCH <sub>3</sub> | 7        | <5                     |
| 2              | Cu(OTf) <sub>2</sub> (15) | Na <sub>2</sub> SO <sub>4</sub> (2) + Phen.(0.15)               | Air     | PhCH <sub>3</sub> | 7        | <5                     |
| 3              | Cu(OTf) <sub>2</sub> (15) | Na <sub>2</sub> SO <sub>4</sub> (2) + Bipy(0.15)                | Air     | PhCH <sub>3</sub> | 7        | <5                     |
| 4              | Cu(OTf) <sub>2</sub> (15) | Na <sub>2</sub> SO <sub>4</sub> (2)+TMEDA(0.15)                 | Air     | PhCH <sub>3</sub> | 7        | <5                     |
| 5              | Cu(OTf) <sub>2</sub> (15) | Na <sub>2</sub> SO <sub>4</sub> (2) + HOTf (0.15)               | Air     | PhCH <sub>3</sub> | 7        | 12                     |
| 6              | Cu(OTf) <sub>2</sub> (15) | Na <sub>2</sub> SO <sub>4</sub> (2)+Ti(OiPr) <sub>4</sub> (0.2) | Air     | PhCH <sub>3</sub> | 7        | 65                     |
| 7              | Cu(OTf) <sub>2</sub> (15) | Na <sub>2</sub> SO <sub>4</sub> (2)+Ti(OiPr) <sub>4</sub> (0.3) | Air     | PhCH <sub>3</sub> | 7        | 78                     |
| 8 <sup>c</sup> | Cu(OTf) <sub>2</sub> (15) | Na <sub>2</sub> SO <sub>4</sub> (2)+Ti(OiPr) <sub>4</sub> (0.3) | Air     | PhCH <sub>3</sub> | 7        | NR                     |
| 9              | Cu(OTf) <sub>2</sub> (15) | -                                                               | Air     | PhCH <sub>3</sub> | 7        | 37                     |
| 10             | Cu(OTf) <sub>2</sub> (15) | Ti(OiPr) <sub>4</sub> (0.3)                                     | Air     | PhCH <sub>3</sub> | 7        | 42                     |
| 11             | Cu(OTf) <sub>2</sub> (15) | MgSO <sub>4</sub> (2)+ Ti(OiPr) <sub>4</sub> (0.3)              | Air     | PhCH <sub>3</sub> | 7        | 69                     |

<sup>a</sup> Reaction conditions: **2a** (0.33 mmol), **1a** (0.3 mmol), solvent (3 mL). <sup>b</sup> Isolated yields. <sup>c</sup> No **2a**

**Table S3 Optimization of the solvents and oxidant<sup>a</sup>**

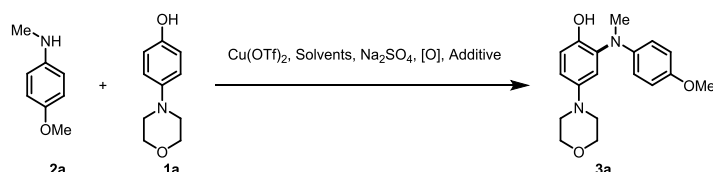

| Entry | Catalyst (mol%)           | Additive (eq.)                                                   | Oxidant        | Solvent           | Time (h) | Yield (%) <sup>b</sup> |
|-------|---------------------------|------------------------------------------------------------------|----------------|-------------------|----------|------------------------|
| 1     | Cu(OTf) <sub>2</sub> (15) | Na <sub>2</sub> SO <sub>4</sub> (2)+ Ti(OiPr) <sub>4</sub> (0.3) | Air            | PhCF <sub>3</sub> | 7        | 66                     |
| 2     | Cu(OTf) <sub>2</sub> (15) | Na <sub>2</sub> SO <sub>4</sub> (2)+ Ti(OiPr) <sub>4</sub> (0.3) | Air            | PhCl              | 7        | 73                     |
| 3     | Cu(OTf) <sub>2</sub> (15) | Na <sub>2</sub> SO <sub>4</sub> (2)+ Ti(OiPr) <sub>4</sub> (0.3) | Air            | HFIP              | 7        | 5                      |
| 4     | Cu(OTf) <sub>2</sub> (15) | Na <sub>2</sub> SO <sub>4</sub> (2)+ Ti(OiPr) <sub>4</sub> (0.3) | Air            | DCM               | 7        | 44                     |
| 5     | Cu(OTf) <sub>2</sub> (15) | Na <sub>2</sub> SO <sub>4</sub> (2)+ Ti(OiPr) <sub>4</sub> (0.3) | Air            | THF               | 7        | 34                     |
| 6     | Cu(OTf) <sub>2</sub> (15) | Na <sub>2</sub> SO <sub>4</sub> (2)+ Ti(OiPr) <sub>4</sub> (0.3) | Air            | MeOH              | 4        | 0                      |
| 7     | Cu(OTf) <sub>2</sub> (15) | Na <sub>2</sub> SO <sub>4</sub> (2)+ Ti(OiPr) <sub>4</sub> (0.3) | O <sub>2</sub> | PhCH <sub>3</sub> | 7        | 27                     |

<sup>a</sup> Reaction conditions: **2a** (0.33 mmol), **1a** (0.3 mmol), solvent (3 mL). <sup>b</sup> Isolated yields.

### 3. Preparation of Starting Materials

#### General Procedure A:

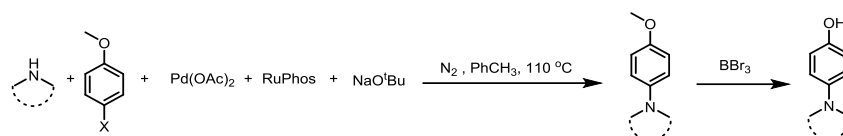

A screw-cap vial equipped with a magnetic stir bar was charged with the aryl halide (5.05 mmol), secondary amine (5 mmol), Pd(OAc)<sub>2</sub> (0.05 mmol), RuPhos (0.1 mmol), and powdered NaO<sup>t</sup>Bu (6 mmol). The vial was transferred to a preheated oil bath (110 °C). After 12 h, the reaction mixture was cooled and dissolved in CH<sub>2</sub>Cl<sub>2</sub>/H<sub>2</sub>O mixture (1:1). The organic phase was separated, the solvent was evaporated in vacuo, and the product was isolated by flash chromatography on a silica gel column (CH<sub>2</sub>Cl<sub>2</sub> or CH<sub>2</sub>Cl<sub>2</sub>/methyl tert-butyl ether).

In a three-necked round-bottomed flask was placed the protected phenol compound (2.23 mmol) in anhydrous CH<sub>2</sub>Cl<sub>2</sub> (30 mL). A solution of 1 M boron tribromide (3 mL, 3.00 mmol) was added dropwise at -78 °C, and the mixture was stirred at room temperature for 3 h. The mixture was poured onto ice and extracted with NaHCO<sub>3</sub> (3 × 30 mL). The organic layers were dried with anhydrous sodium sulfate, filtered and concentrated under reduced pressure. The crude product was purified by silica gel column chromatography.

#### General Procedure B:

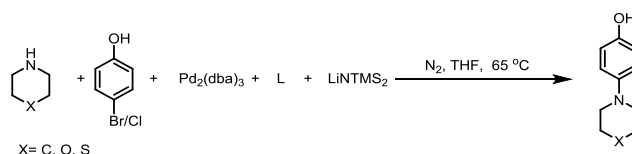

An oven-dried Schlenk tube was charged with Pd<sub>2</sub>(dba)<sub>3</sub> (2 mol % Pd), Davephose(2.4 mol %), aryl halide (5 mmol), and amine (6 mmol). The Schlenk tube was evacuated and back-filled with argon, and the Teflon screwcap was replaced with a rubber septa. The LiN(TMS)<sub>2</sub> solution (1 M in THF, 5.5 mL) was added via syringe (substrates that are liquids at room temperature were added at this point). The rubber septum was replaced with the Teflon screwcap, and the reaction vessel was sealed. The reaction mixture was heated at 65 °C with stirring until the aryl halide had been consumed as judged by GC analysis. The reaction mixture was then allowed to cool to room temperature. To the reaction mixture was added 1 M HCl (5-10 mL), and the mixture was stirred at room temperature for 5 min, followed by neutralization with a saturated NaHCO<sub>3</sub> solution (5-10 mL), and the reaction mixture was diluted with ethyl acetate. The organic layer was dried with MgSO<sub>4</sub>, filtered through a pad of celite, and concentrated in vacuo. The crude residue was purified by flash chromatography on silica gel using mixtures of ethyl acetate/hexanes or methanol/ dichloromethane (for very polar compounds) as the eluent.

**General Procedure C (procedure for Synthesis of N-alkylaniline):** all of the N-alkylaniline were reported compounds.

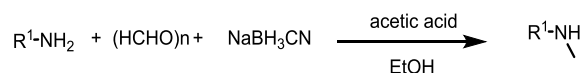

To a solution of aniline (10 mmol) in 40 mL of water-free ethanol, paraformaldehyde (12 mmol) and a drop of acetic acid as the catalyst were added. After the reaction was carried out for 2 h at room temperature, sodium cyanoborohydride (12 mmol) was added and the reaction was continued until the material disappeared as monitored by TLC. The solvent was removed in vacuum, and 50 mL of ethanol was added to the mixture. The resulting mixture was washed by saturated sodium carbohydrate and water subsequently, dried over sodium

sulfate, concentrated in vacuum to afford *N*-alkylaniline.

#### 4. General Reaction Procedure

##### For 0.3 mmol scales:

To a reaction oven-dried tube equipped with stir bar, Na<sub>2</sub>SO<sub>4</sub> (85.2 mg, 2.0 eq., 0.6 mmol) and Cu(OTf)<sub>2</sub> (16.2 mg, 0.045 mmol, 15 mol%) were added. A solution of *N*-alkylaniline (35.3 mg, 0.33 mmol, 1.1 eq) and *p*-aminophenol (0.3 mmol, 1.0 eq.) were added totally 3 mL toluene. The tube was capped with a rubber stopper, then, Ti(OiPr)<sub>4</sub> (25 mg, 0.09 mmol, 30 mol%) was added dropwise via syringe. The resulting mixture was stirred 7-10 h at the corresponding temperature. After the reaction completed, quenched by 0.1 M HCl (1 mL), then extract with NaHCO<sub>3</sub> (5 mL, aq.) and EA for 3 times, pH > 8, and the organic layer was concentrated under vacuum. The subsequent residue was purified by column chromatography to get the desired compounds.

##### For 3 mmol scales (3o):

To a reaction oven-dried tube equipped with stir bar, Na<sub>2</sub>SO<sub>4</sub> (852 mg, 2.0 eq., 6 mmol) and Cu(OTf)<sub>2</sub> (162 mg, 0.45 mmol, 15 mol%) were added. A solution of *N*-alkylaniline (353 mg, 3.3 mmol, 1.1 eq) and *p*-aminophenol (3 mmol, 1.0 eq.) were added totally 22 mL toluene. The tube was capped with a rubber stopper, then, Ti(OiPr)<sub>4</sub> (250 mg, 0.9 mmol, 30 mol%) was added dropwise via syringe. The resulting mixture was stirred 24 h at the room temperature. After the reaction completed, quenched by 0.1 M HCl (5 mL), then extract with saturated NaHCO<sub>3</sub> (15 mL, aq.) and EA for 3 times, pH > 8, and the organic layer was concentrated under vacuum. The subsequent residue was purified by column chromatography to get the desired compounds.

## 5. Mechanistic Study

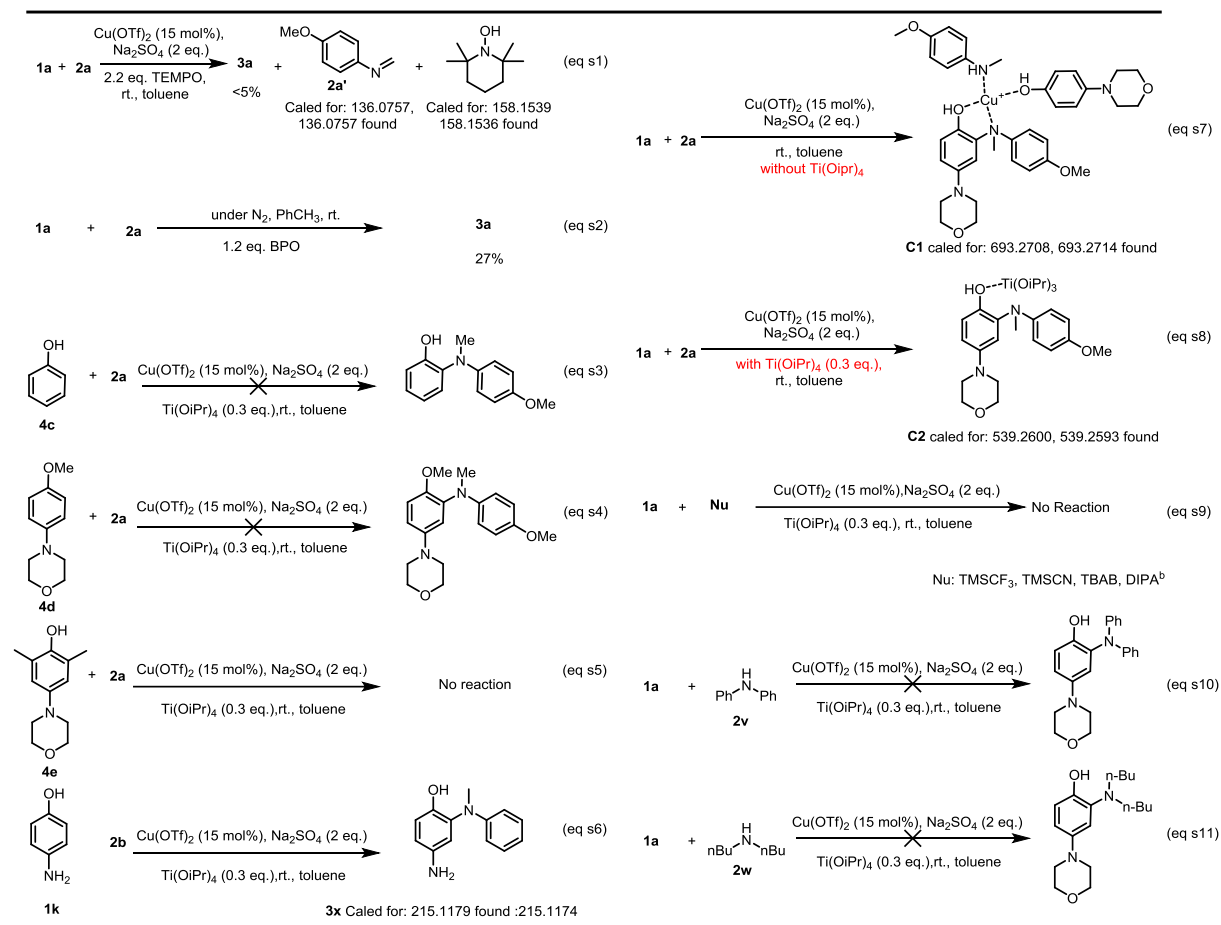

<sup>a</sup> 1a (4c, 4d or 4e) (0.3 mmol), 2a (0.33 mmol); <sup>b</sup> No Cu(OTf)<sub>2</sub>

The reactants **1a**, **4c**, **4d** and **4e** were conducted in 0.3 mmol, **2a** 0.33 mmol, Cu(OTf)<sub>2</sub> 0.045 mmol, Na<sub>2</sub>SO<sub>4</sub> 0.6 mmol, and 0.09 mmol Ti(O<sup>i</sup>Pr)<sub>4</sub> was added. We invested the radical scavenger test (eq.s1), radical initiator experiments (eq. s2), which shows that the process of radicals is most likely. Eq. s3 – eq. s6 suggests that the phenolic hydroxyl-, protected-amino and the active site of the substrate are very vital. The reaction mixture were detected by HRMS, and two key species **C1** and **C2** were detected (eq. s7- eq. s8). In order to preclude the S<sub>NR1</sub> mechanism, we replaced **2a** with various nucleophiles, there were no reaction (eq. s9). Diarylamines and aliphatic amines were tried in the reaction. When monoarylamine is replaced by diphenylamine **2v** in the reaction (eq. s10), there was no reaction; when aliphatic amines (di-*n*-butylamine) **2w** participated in the reaction (eq. s11), however, the products were extremely complicated accompany with precipitation.

Spectrum from JGC120211206-4.wiff (sample 1) - JGC120211206-4, +TOF \*5 (100 - 600) from 0.190 to 0.196 min

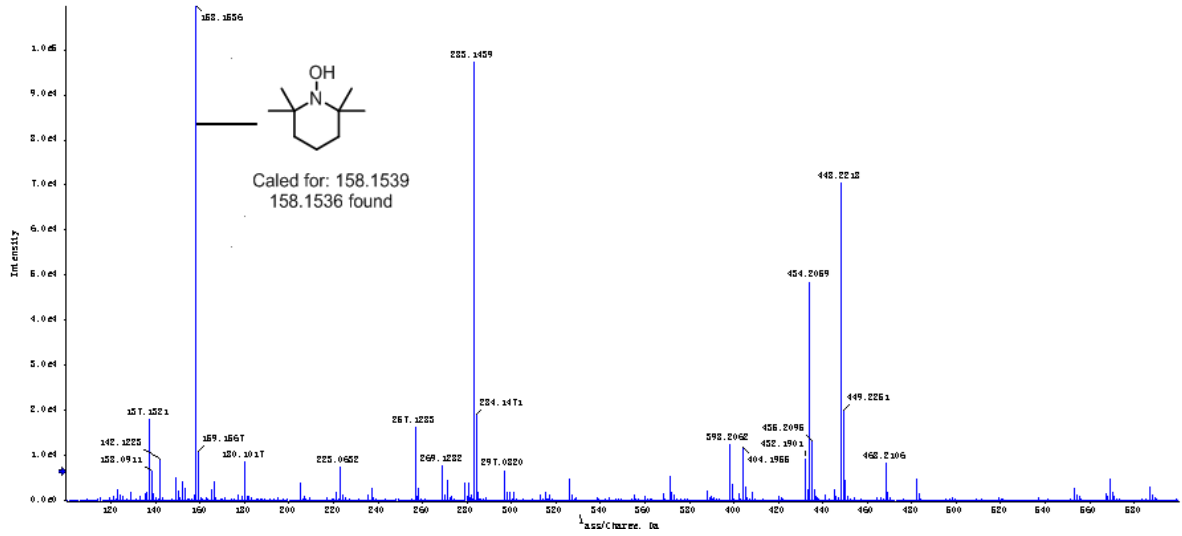

Spectrum from JGC120211206-4.wiff (sample 1) - JGC120211206-4, +TOF \*5 (100 - 600) from 0.054 to 0.115 min

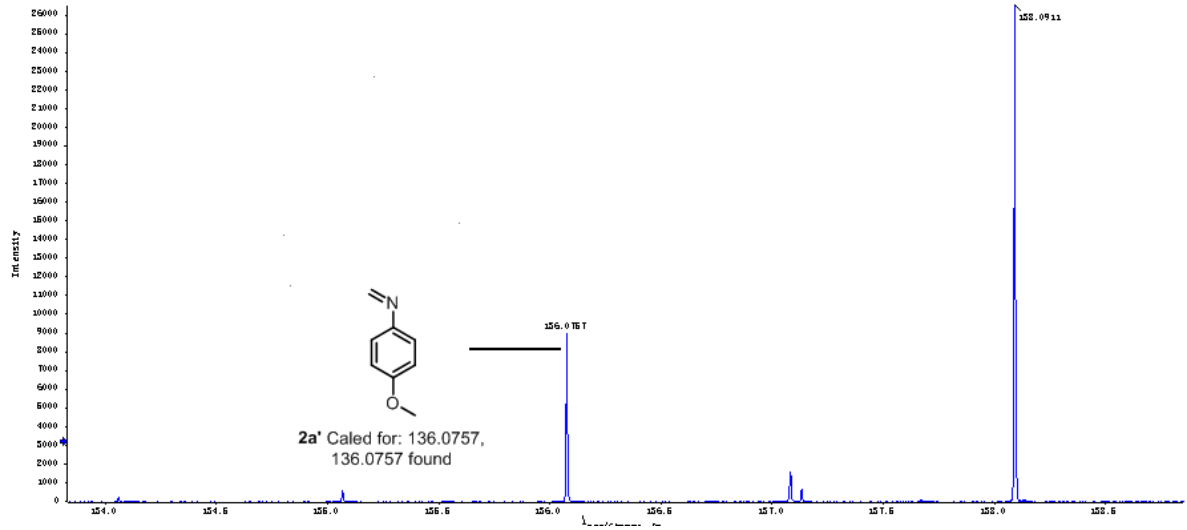

Spectrum from JGC120211206-2.wiff (sample 1) - JGC120211206-2, +TOF \*5 (100 - 600) from 0.054 to 0.137 min

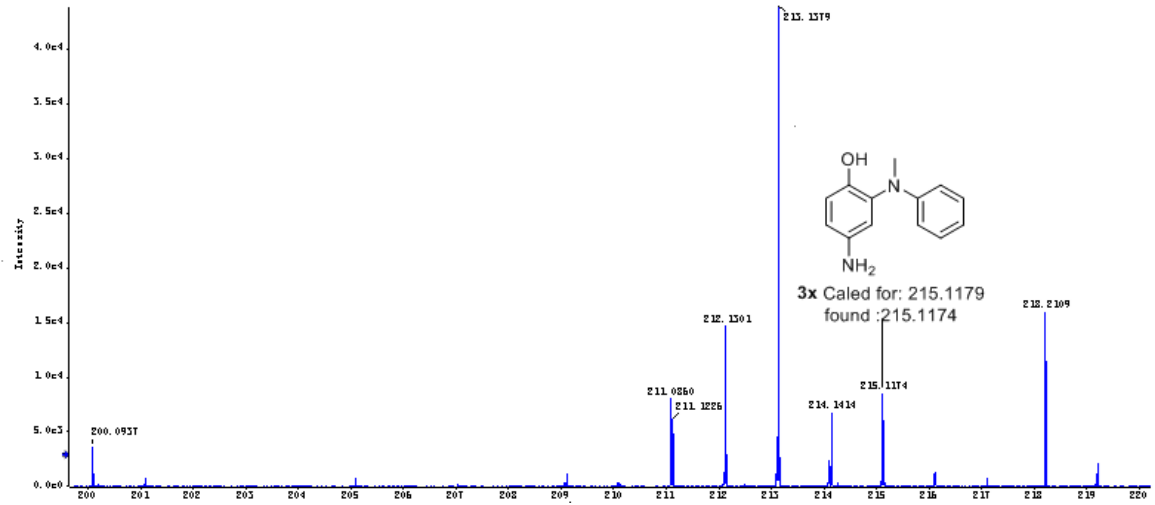

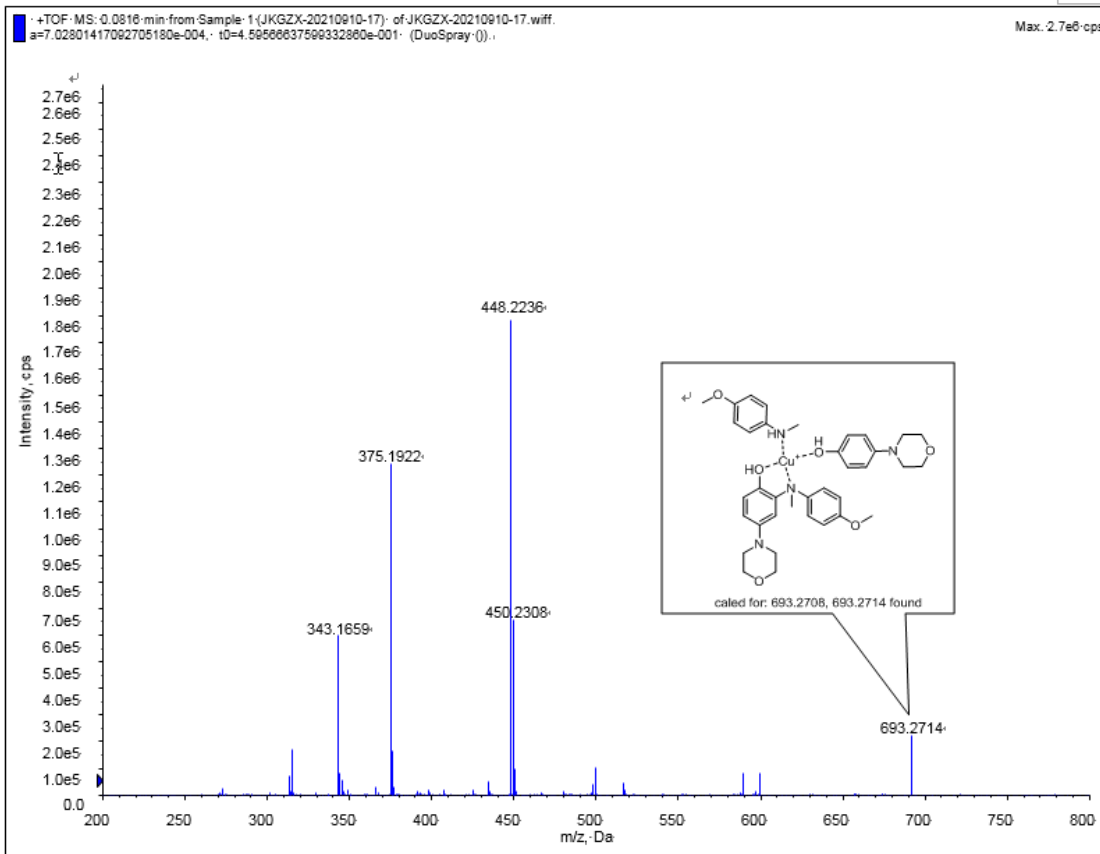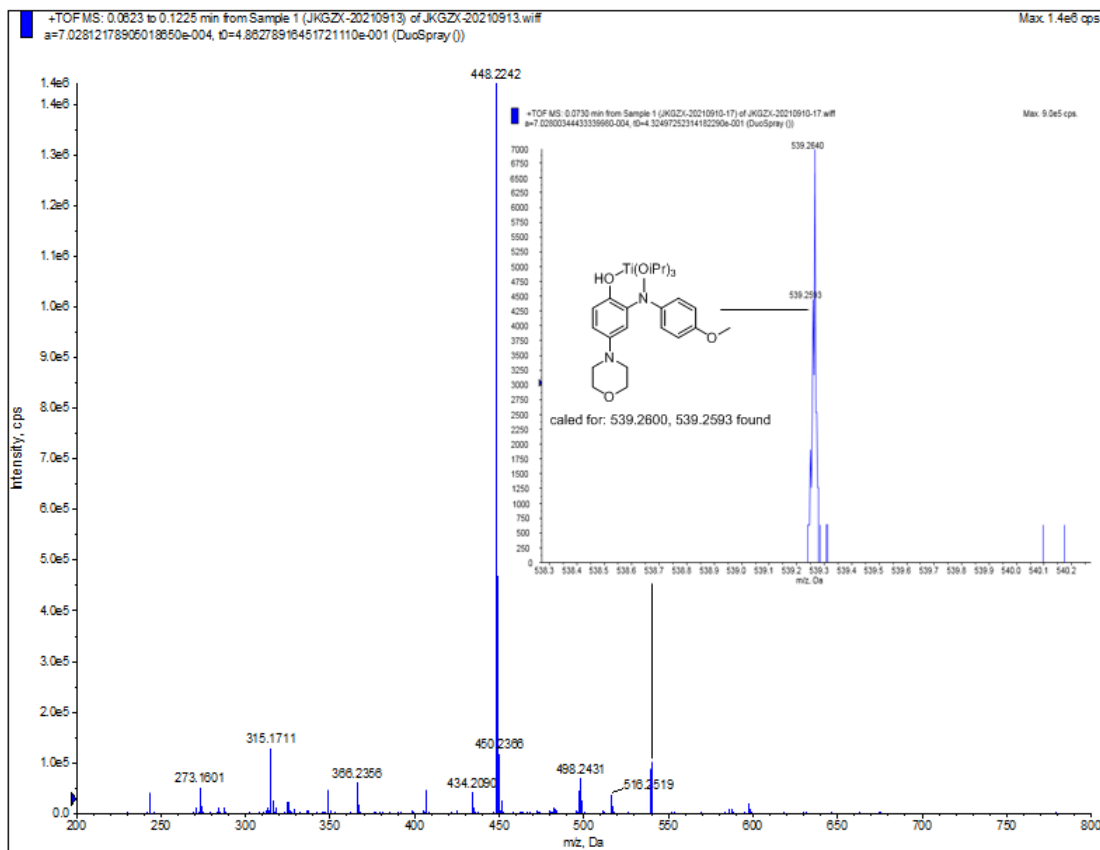



## EPR experiments

EPR spectra recorded at room temperature using DMPO as trapping agent. 0.1 mmol scales, 0.1M. The mixture was filtered by syringe filter (0.22  $\mu\text{m}$ ). Microwave frequency = 9.6457. Microwave power = 6.325 mW. Mod. ampl. = 14 G.

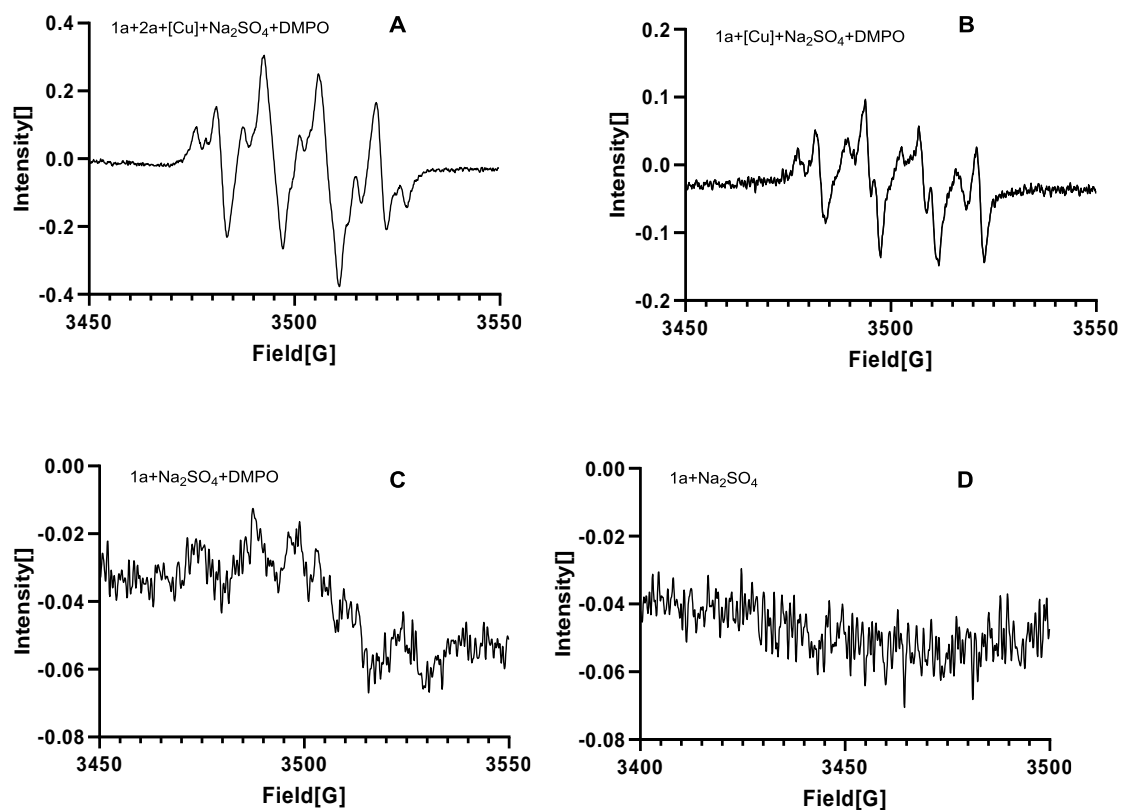

Figure S1 EPR spectra of mixture.

## 6. Characterization of Compounds and X-ray Structure of 5a.

### 6.1 Characterization of Compounds

**1a**<sup>1</sup>, **1b**<sup>1</sup>, **1c**<sup>2</sup>, **4a**<sup>3</sup>, **4b**<sup>1</sup> and **4d**<sup>4</sup> and are known compounds. **1d** and **4c** were commercial available. **4e** was synthesized through known literature<sup>1</sup>.

**4-morpholinophenol(1a)**: known compounds,<sup>1</sup> general procedure B, purified by SiO<sub>2</sub> column chromatography (hexane/EtOAc = 5:1) to give red solid, 1.66 g (10 mmol), 92 % yield, which perfect consistent with the literature.<sup>2</sup> **<sup>1</sup>H NMR** (400 MHz, Methanol-*d*<sub>4</sub>)  $\delta$  6.86 - 6.81 (m, 2H), 6.76 - 6.66 (m, 2H), 3.79 (t, *J* = 4.0 Hz, 4H), 2.97 (t, *J* = 4.0 Hz, 4H).

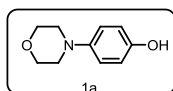

**4-(piperidin-1-yl)phenol(1b)**: known compounds,<sup>1</sup> general procedure B, purified by SiO<sub>2</sub> column chromatography (hexane/EtOAc = 5:1) to give gray solid, 779 mg, 88 % yield, which perfect consistent with the literature.<sup>2</sup> **<sup>1</sup>H NMR** (500 MHz, Methanol-*d*<sub>4</sub>)  $\delta$  6.85 (d, *J* = 9.0 Hz, 2H), 6.67 (d, *J* = 8.8 Hz, 2H), 2.91 (t, 4H), 1.74 - 1.63 (m, 4H), 1.56 - 1.43 (m, 2H).

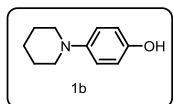

**4-thiomorpholinophenol(1c):** known compounds,<sup>2</sup> general procedure B, purified by SiO<sub>2</sub> column chromatography

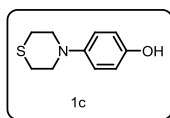

(hexane/EtOAc = 5:1) to give white solid, 780 mg, 82 % yield. <sup>1</sup>H NMR (500 MHz, Methanol-*d*<sub>4</sub>) δ 7.35 (d, *J* = 8.3 Hz, 2H), 7.03 (d, *J* = 8.4 Hz, 2H), 3.96 - 3.47 (m, 4H), 3.16 (d, *J* = 6.8 Hz, 4H). <sup>13</sup>C NMR (125 MHz, MeOD) δ 121.8, 116.8, 56.5, 27.1.

**4-(3,4-dihydroquinolin-1(2H)-yl)phenol(1d):** commercial available. <sup>1</sup>H NMR (500 MHz, Methanol-*d*<sub>4</sub>) δ 6.97 (d, *J* =

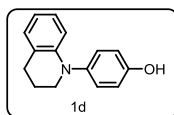

8.8 Hz, 2H), 6.88 (d, *J* = 9.0 Hz, 1H), 6.78 (d, *J* = 8.7 Hz, 2H), 6.74 (t, *J* = 8.5 Hz, 1H), 6.50 (t, *J* = 7.3 Hz, 1H), 6.32 (d, *J* = 9.3 Hz, 1H), 3.47 - 3.39 (m, 2H), 2.74 (t, *J* = 6.4 Hz, 2H), 1.98 - 1.84 (m, 2H). <sup>13</sup>C NMR (125 MHz, MeOD) δ 153.7, 145.0, 139.9, 128.1, 126.9, 125.2, 122.0, 116.1, 115.2,

113.4, 51.0, 26.8, 21.6.

**4-(indolin-1-yl)phenol(1e):** general procedure A, purified by SiO<sub>2</sub> column chromatography (hexane/EtOAc = 8:1) to

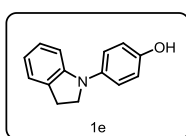

give dark red solid, 122 mg (1mmol), 59% yield. <sup>1</sup>H NMR (500 MHz, Methanol-*d*<sub>4</sub>) δ 6.97 - 6.91 (m, 3H), 6.87 - 6.80 (m, 1H), 6.77 - 6.70 (m, 2H), 6.65 (d, *J* = 7.9 Hz, 1H), 6.53 (t, *J* = 7.3 Hz, 1H), 3.56 (t, *J* = 8.4 Hz, 2H), 2.83 (t, *J* = 8.4 Hz, 2H). <sup>13</sup>C NMR (125MHz, MeOD) δ 151.4, 148.1, 136.4, 129.7, 125.8, 123.6, 120.3, 117.0, 114.7, 106.2, 52.3, 27.0. HRMS (ESI) *m/z* calcd for C<sub>14</sub>H<sub>14</sub>NO<sup>+</sup> (M+H)<sup>+</sup> : 212.1069, found 212.1068.

**4-(methyl(naphthalen-2-yl)amino)phenol(1f):** general procedure A, purified by SiO<sub>2</sub> column chromatography

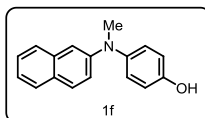

(hexane/EtOAc = 8:1) to give black solid, 958mg, 77% yield, <sup>1</sup>H NMR (500 MHz, Methanol-*d*<sub>4</sub>) δ 7.85 (d, *J* = 8.5 Hz, 1H), 7.72 (d, *J* = 8.2 Hz, 1H), 7.56 (d, *J* = 8.2 Hz, 1H), 7.30 (t, *J* = 7.9 Hz, 2H), 7.21 (t, *J* = 7.6 Hz, 1H), 7.12 (d, *J* = 7.4 Hz, 1H), 6.63 (d, *J* = 9.0 Hz, 2H), 6.49 (d, *J* = 9.0 Hz, 2H), 3.15 (s, 3H). <sup>13</sup>C NMR (125 MHz, MeOD) δ 148.6, 145.9, 143.7, 134.3, 129.9, 127.3, 125.2, 124.8, 124.6, 124.3, 123.0, 121.8, 116.1, 114.6, 39.8. HRMS (ESI) *m/z* calcd for C<sub>17</sub>H<sub>16</sub>NO<sup>+</sup> [M+H]<sup>+</sup>: 250.1226, found 250.1227.

**4-((4-methoxyphenyl)(methyl)amino)phenol(1g):** general procedure A, purified by SiO<sub>2</sub> column chromatography

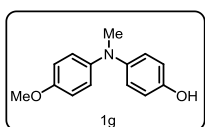

(hexane/EtOAc = 8:1) to give yellowish brown solid, 213 (1 mmol) mg, 93% yield. <sup>1</sup>H NMR (500MHz, Methanol-*d*<sub>4</sub>): δ 6.82-6.76(m, 6H), 6.73-6.69(m, 2H), 3.71(s, 3H), 3.12(s, 3H). <sup>13</sup>C NMR (125 MHz, Methanol-*d*<sub>4</sub>): δ 155.3, 153.6, 145.6, 144.2, 124.2, 121.3, 116.8, 115.4, 56.0, 41.6. HRMS (ESI) *m/z* calcd for C<sub>14</sub>H<sub>16</sub>NO<sub>2</sub><sup>+</sup> [M+H]<sup>+</sup>: 230.1175, found 230.1174.

**4-(phenyl(tetradecyl)amino)phenol(1h):** general procedure A, purified by SiO<sub>2</sub> column chromatography

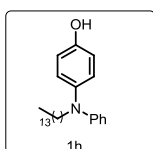

(hexane/EtOAc = 10:1) to give yellowish brown solid, 236 mg (1 mmol), 53% yield. <sup>1</sup>H NMR (500MHz, Methanol-*d*<sub>4</sub>): δ 7.09 (t, *J* = 7.9 Hz, 2H), 6.97 (d, *J* = 8.4 Hz, 2H), 6.81 (d, *J* = 8.5 Hz, 2H), 6.66 (d, *J* = 8.1 Hz, 3H), 3.58 (t, *J* = 7.6 Hz, 2H), 1.63 (t, *J* = 7.4 Hz, 2H), 1.32 - 1.27 (m, 22H), 0.92 (t, *J* = 6.7 Hz, 3H). <sup>13</sup>C NMR (125 MHz, Methanol-*d*<sub>4</sub>): δ 155.6, 150.7, 141.1, 129.7, 129.0, 118.4,

117.2, 116.2, 53.4, 33.1, 30.8, 30.8, 30.8, 30.7, 30.7, 30.6, 30.5, 28.6, 28.1, 23.8, 23.7, 14.5. HRMS (ESI) *m/z* calcd for C<sub>26</sub>H<sub>40</sub>NO<sup>+</sup> [M+H]<sup>+</sup>: 382.3104, found 382.3100.

**4-(benzyl(phenyl)amino)phenol(1i):** general procedure A, purified by SiO<sub>2</sub> column chromatography (hexane/EtOAc

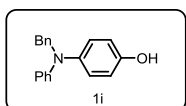

= 8:1) to give white solid, 205 mg (1mmol), 75% yield. <sup>1</sup>H NMR (500 MHz, Methanol-*d*<sub>4</sub>) δ 7.31 (d, *J* = 7.17 Hz, 2H), 7.25 (t, *J* = 7.65 Hz, 2H), 7.17 (t, *J* = 7.14 Hz, 1H), 7.07 - 7.01 (m, 4H), 6.77 (d, *J* = 8.83 Hz, 2H), 6.71 - 6.68 (m, 2H), 6.65 (t, *J* = 7.29 Hz, 1H), 4.84 (s, 2H). <sup>13</sup>C NMR

(125 MHz, Methanol- $d_4$ )  $\delta$  155.5, 150.5, 141.5, 140.9, 129.7, 129.4, 128.3, 127.8, 127.6, 118.9, 117.2, 116.6, 57.6.

**HRMS** (ESI)  $m/z$  calcd for  $C_{19}H_{18}NO^+$   $[M+H]^+$ : 276.1382, found 276.1381.

**4-(2,3-dihydro-4H-benzo[b][1,4]oxazin-4-yl)phenol(1j)**: general procedure A, purified by  $SiO_2$  column

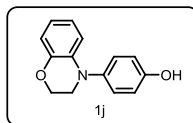

chromatography (hexane/EtOAc = 8:1) to give brown solid, 737mg, 65% yield.  $^1H$  NMR (500 MHz, Methanol- $d_4$ )  $\delta$  7.01 (d,  $J$  = 8.8 Hz, 2H), 6.80 (d,  $J$  = 8.7 Hz, 2H), 6.75 - 6.70 (m, 1H), 6.61 - 6.54 (m, 2H), 6.53 - 6.46 (m, 1H), 4.19 (t, 2H), 3.51 (t, 2H).  $^{13}C$  NMR (125 MHz, MeOD)  $\delta$  155.7, 145.7, 140.5, 135.6, 127.8, 121.8, 119.8, 117.5, 117.1, 116.6, 65.5, 50.6. **HRMS** (ESI)  $m/z$  calcd for  $C_{14}H_{14}NO_2^+$   $[M+H]^+$  228.1019, found 228.1019.

**2-((4-methoxyphenyl)(methyl)amino)-4-morpholinophenol(3a)**: purified by  $SiO_2$  column chromatography

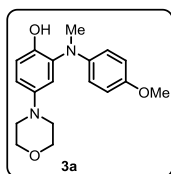

(hexane/EtOAc = 15:1) to give black oil, 73 mg, 78% yield.  $^1H$  NMR (500 MHz, Chloroform- $d$ )  $\delta$  6.96 (d,  $J$  = 8.7 Hz, 1H), 6.84 - 6.75 (m, 3H), 6.73 - 6.61 (m, 3H), 5.87 (s, 1H), 3.81 (d,  $J$  = 4.6 Hz, 4H), 3.75 (s, 3H), 3.14 (s, 3H), 2.99 (t,  $J$  = 4.8 Hz, 4H).  $^{13}C$  NMR (125 MHz,  $CDCl_3$ )  $\delta$  153.3, 146.9, 146.1, 143.5, 116.6, 116.0, 115.5, 114.8, 114.6, 67.0, 55.7, 50.8, 40.4. **HRMS** (ESI)  $m/z$  calcd for  $C_{18}H_{23}N_2O_3^+$   $[M+H]^+$  315.1703, found 315.1698.

**2-((4-methoxyphenyl)(methyl)amino)-4-(piperidin-1-yl)phenol(3b)**: purified by  $SiO_2$  column chromatography

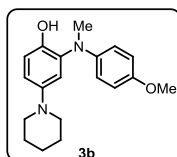

(hexane/EtOAc = 15:1) to give black oil, 66 mg, 71 % yield.  $^1H$  NMR (500 MHz, Chloroform- $d$ )  $\delta$  6.94 (d,  $J$  = 8.8 Hz, 1H), 6.85 - 6.77 (m, 3H), 6.72 - 6.66 (m, 3H), 5.81 (s, 1H), 3.76 (s, 3H), 3.14 (s, 3H), 3.00 - 2.91 (m, 4H), 1.69 (p,  $J$  = 5.8 Hz, 4H), 1.51 (t,  $J$  = 6.0 Hz, 2H).  $^{13}C$  NMR (125 MHz,  $CDCl_3$ )  $\delta$  153.2, 147.3, 146.4, 143.6, 136.3, 117.0, 116.4, 115.7, 115.1, 114.5, 55.6, 52.3, 40.4, 26.0, 24.1. **HRMS** (ESI)  $m/z$  calcd for  $C_{19}H_{25}N_2O_2^+$   $[M+H]^+$  313.1911, found 313.1906.

**2-((4-methoxyphenyl)(methyl)amino)-4-thiomorpholinophenol(3c)**: purified by  $SiO_2$  column chromatography

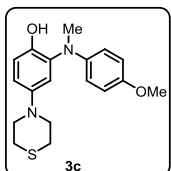

(hexane/EtOAc = 15:1) to give black solid, 56 mg, 57 % yield.  $^1H$  NMR (500 MHz, Chloroform- $d$ )  $\delta$  = 6.95 (d,  $J$  = 8.6 Hz, 1H), 6.80 (d,  $J$  = 8.2 Hz, 3H), 6.72 - 6.60 (m, 3H), 5.83 (s, 1H), 3.76 (s, 3H), 3.35 - 3.26 (m, 4H), 3.14 (s, 3H), 2.95 - 2.54 (m, 4H).  $^{13}C$  NMR (125 MHz,  $CDCl_3$ )  $\delta$  153.4, 147.2, 147.0, 143.5, 136.6, 118.1, 116.9, 116.6, 115.4, 114.6, 55.7, 53.8, 40.5, 27.7. **HRMS** (ESI)  $m/z$  calcd for  $C_{18}H_{23}N_2O_2S^+$   $[M+H]^+$  331.1475, found 331.1475.

**4-(3,4-dihydroquinolin-1(2H)-yl)-2-((4-methoxyphenyl)(methyl)amino)phenol(3d)**: purified by  $SiO_2$  column

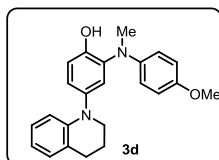

chromatography (hexane/EtOAc = 15:1) to give black solid, 67 mg, 62 % yield.  $^1H$  NMR (500 MHz, Chloroform- $d$ )  $\delta$  7.12 - 7.03 (m, 2H), 7.00 (d,  $J$  = 2.3 Hz, 2H), 6.90 (d,  $J$  = 7.5 Hz, 1H), 6.84 (d,  $J$  = 9.2 Hz, 2H), 6.75 (d,  $J$  = 9.1 Hz, 2H), 6.64 (t,  $J$  = 6.7 Hz, 1H), 6.53 (d,  $J$  = 7.8 Hz, 1H), 6.12 (s, 1H), 3.78 (s, 3H), 3.55 (t,  $J$  = 5.6 Hz, 2H), 3.17 (s, 3H), 2.86 (t,  $J$  = 6.4 Hz, 2H), 2.05 (m, 2H).  $^{13}C$  NMR (125 MHz,  $CDCl_3$ )  $\delta$  153.5, 149.7, 145.3, 143.3, 141.5, 137.2, 129.3, 126.4, 125.8, 124.3, 123.0, 117.2, 116.8, 115.8, 114.6, 114.1, 55.6, 51.6, 40.6, 27.8, 22.5. **HRMS** (ESI)  $m/z$  calcd for  $C_{23}H_{25}N_2O_2^+$   $[M+H]^+$  361.1911, found 361.1908.

**4-(indolin-1-yl)-2-((4-methoxyphenyl)(methyl)amino)phenol(3e)**: purified by  $SiO_2$  column chromatography

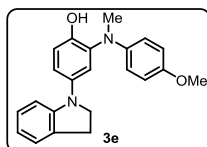

(hexane/EtOAc = 15:1) to give brown solid, 52 mg, 51 % yield.  $^1H$  NMR (500 MHz, Chloroform- $d$ )  $\delta$  7.16 - 6.93 (m, 5H), 6.83 (d,  $J$  = 8.4 Hz, 3H), 6.75 (d,  $J$  = 8.5 Hz, 2H), 6.70 (t,  $J$  = 7.3 Hz, 1H), 5.97 (s, 1H), 3.83 (t,  $J$  = 8.5 Hz, 2H), 3.78 (s, 3H), 3.18 (s, 3H), 3.09 (t,  $J$  = 8.5

Hz, 2H). **<sup>13</sup>C NMR** (125 MHz, CDCl<sub>3</sub>) δ 153.5, 148.3, 147.6, 143.4, 138.2, 136.7, 130.6, 127.1, 124.8, 118.8, 118.2, 117.2, 116.7, 115.5, 114.9, 114.6, 113.7, 107.2, 55.6, 53.0, 40.5, 28.2. **HRMS** (ESI) m/z calcd for C<sub>22</sub>H<sub>23</sub>N<sub>2</sub>O<sub>2</sub><sup>+</sup> [M+H]<sup>+</sup> 347.1754, found 347.1751.

**4-(4H-benzo[b][1,4]oxazin-4-yl)-2-((4-methoxyphenyl)(methyl)amino)phenol(3f)**: purified by SiO<sub>2</sub> column

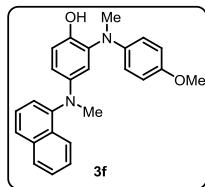

chromatography (hexane/EtOAc = 15:1) to give black solid, 60 mg, 56 % yield. **<sup>1</sup>H NMR** (500 MHz, Chloroform-*d*) δ 7.13 (d, *J* = 8.8 Hz, 3H), 6.93 - 6.81 (m, 5H), 6.77 - 6.64 (m, 5H), 5.37 (s, 1H), 4.34 (t, *J* = 4.4 Hz, 3H), 3.65 (t, *J* = 4.4 Hz, 3H). **<sup>13</sup>C NMR** (125 MHz, CDCl<sub>3</sub>) δ 152.8, 144.3, 140.1, 134.1, 126.6, 121.1, 119.2, 119.2, 116.8, 116.4, 116.3, 115.7, 64.5, 49.4. **HRMS** (ESI) m/z calcd for C<sub>22</sub>H<sub>21</sub>N<sub>2</sub>O<sub>3</sub><sup>+</sup> [M+H]<sup>+</sup> 361.1547, found 361.1547.

**2,4-bis((4-methoxyphenyl)(methyl)amino)phenol(3g)**: purified by SiO<sub>2</sub> column chromatography (hexane/EtOAc =

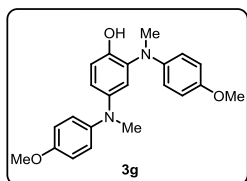

15:1) to give light red solid, 76 mg, 70 % yield. **<sup>1</sup>H NMR** (500 MHz, Chloroform-*d*) δ 6.96 - 6.89 (m, 3H), 6.85 - 6.78 (m, 5H), 6.75 - 6.67 (m, 3H), 5.84 (s, 1H), 3.78 (s, 3H), 3.76 (s, 3H), 3.17 (s, 3H), 3.14 (s, 3H). **<sup>13</sup>C NMR** (125 MHz, CDCl<sub>3</sub>) δ 154.3, 153.2, 147.1, 143.9, 143.4, 143.4, 136.5, 121.6, 119.8, 118.0, 116.4, 115.4, 114.5, 55.6, 55.5, 41.0, 40.4. **HRMS** (ESI) m/z calcd for C<sub>22</sub>H<sub>25</sub>N<sub>2</sub>O<sub>3</sub><sup>+</sup> [M+H]<sup>+</sup> 365.1860, found 365.1858.

**2-((4-methoxyphenyl)(methyl)amino)-4-(phenyl(tetradecyl)amino)phenol(3h)**: purified by SiO<sub>2</sub> column

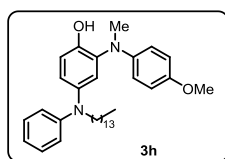

chromatography (hexane/EtOAc = 20:1) to give brown solid, 70 mg, 45 % yield. **<sup>1</sup>H NMR** (400 MHz, Chloroform-*d*) δ 7.20 - 7.11 (m, 2H), 7.06 - 6.94 (m, 2H), 6.89 (d, *J* = 2.4 Hz, 1H), 6.81 (d, *J* = 9.1 Hz, 2H), 6.76 - 6.68 (m, 5H), 6.07 (s, 1H), 3.77 (s, 3H), 3.66 - 3.49 (m, 2H), 3.15 (s, 3H), 1.61 (t, *J* = 7.5 Hz, 2H), 1.38 - 1.09 (m, 24H), 0.90 (t, *J* = 6.7 Hz, 3H). **<sup>13</sup>C NMR** (125 MHz, CDCl<sub>3</sub>) δ 153.5, 149.5, 148.9, 143.4, 141.0, 137.2, 131.7, 129.0, 125.7, 124.3, 117.8, 116.8, 115.9, 115.7, 115.4, 114.6, 55.9, 55.7, 52.5, 40.7, 32.0, 29.8, 29.7, 29.7, 29.7, 29.5, 29.4, 27.5, 27.1, 22.8, 14.2. **HRMS** (ESI) m/z C<sub>34</sub>H<sub>49</sub>N<sub>2</sub>O<sub>2</sub><sup>+</sup> [M+H]<sup>+</sup> 517.3789, found 517.3790.

**4-(benzyl(phenyl)amino)-2-((4-methoxyphenyl)(methyl)amino)phenol(3i)**: purified by SiO<sub>2</sub> column

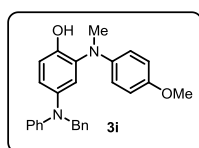

chromatography (hexane/EtOAc = 15:1) to give black solid, 79 mg, 65 % yield. **<sup>1</sup>H NMR** (500 MHz, Chloroform-*d*) δ 7.28 - 7.20 (m, 4H), 7.15 (t, *J* = 7.1 Hz, 1H), 7.06 (t, 2H), 6.93 - 6.86 (m, 2H), 6.83 (d, *J* = 2.5 Hz, 1H), 6.78 - 6.71 (m, 4H), 6.70 - 6.59 (m, 3H), 4.80 (s, 2H), 3.69 (s, 3H), 3.06 (s, 3H). **<sup>13</sup>C NMR** (125 MHz, MeOD) δ 154.0, 151.2, 150.4, 145.2, 142.0, 140.7, 138.8, 129.8, 129.4, 128.0, 127.7, 125.8, 124.9, 119.4, 118.1, 117.2, 117.2, 115.8, 115.5, 115.3, 57.4, 56.1, 40.0. **HRMS** (ESI) m/z calcd for C<sub>27</sub>H<sub>27</sub>N<sub>2</sub>O<sub>2</sub><sup>+</sup> [M+H]<sup>+</sup> 411.2067, found 411.2066.

**2-((4-methoxyphenyl)(methyl)amino)-4-(methyl(naphthalen-1-yl)amino)phenol(3j)**: purified by SiO<sub>2</sub> column

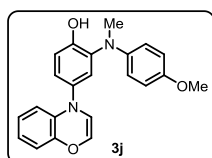

chromatography (hexane/EtOAc = 15:1) to give black solid, 58 mg, 51 % yield. **<sup>1</sup>H NMR** (500 MHz, Methanol-*d*<sub>4</sub>) δ 7.83 (dd, *J* = 14.5, 8.3 Hz, 2H), 7.62 (d, *J* = 8.2 Hz, 1H), 7.47 - 7.31 (m, 3H), 7.22 (d, *J* = 7.3 Hz, 1H), 6.76 (d, *J* = 8.8 Hz, 1H), 6.61 (d, *J* = 9.2 Hz, 2H), 6.52 (d, *J* = 9.1 Hz, 2H), 6.47 (dd, *J* = 8.8, 2.9 Hz, 1H), 6.30 (d, *J* = 2.9 Hz, 1H), 3.65 (s, 3H), 3.24 (s, 3H), 2.99 (s, 3H). **<sup>13</sup>C NMR** (125 MHz, MeOD) δ 153.7, 147.7, 147.0, 146.5, 138.0, 136.5, 131.9, 129.4, 127.3, 126.9, 126.7, 126.5, 125.2, 123.8, 117.8, 116.8, 116.1, 115.6, 115.2, 56.1, 41.7, 39.9. **HRMS** (ESI) m/z calcd for C<sub>25</sub>H<sub>25</sub>N<sub>2</sub>O<sub>2</sub><sup>+</sup> [M+H]<sup>+</sup> 385.1911, found 385.1908.

**2-((methyl(phenyl)amino)-4-morpholinopheno(3k):** purified by SiO<sub>2</sub> column chromatography (hexane/EtOAc = 15:1)

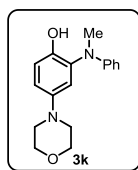

to give black oil, 53 mg, 62 % yield <sup>1</sup>H NMR (500 MHz, Chloroform-*d*) δ 7.23 (t, *J* = 7.8 Hz, 2H), 6.99 (d, *J* = 8.9 Hz, 1H), 6.86 - 6.81 (m, 2H), 6.72 (d, *J* = 8.2 Hz, 2H), 6.68 (d, *J* = 2.8 Hz, 1H), 5.71 (s, 1H), 3.82 (t, *J* = 4.7 Hz, 4H), 3.20 (s, 3H), 3.01 (t, *J* = 4.7 Hz, 4H). <sup>13</sup>C NMR (125 MHz, CDCl<sub>3</sub>) δ = 149.1, 146.9, 146.2, 135.5, 129.1, 119.0, 116.5, 115.7, 115.2, 114.5, 66.9, 50.6, 39.7. HRMS (ESI) *m/z* calcd for C<sub>17</sub>H<sub>21</sub>N<sub>2</sub>O<sub>2</sub><sup>+</sup> [M+H]<sup>+</sup> 285.1598, found 285.1599.

**2-((methyl(4-(trifluoromethyl)phenyl)amino)-4-morpholinopheno(3l):** purified by SiO<sub>2</sub> column chromatography

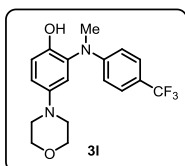

(hexane/EtOAc = 15:1) to give light yellow solid, 52 mg, 50 % yield. <sup>1</sup>H NMR (500 MHz, Methanol-*d*<sub>4</sub>) δ 7.34 (d, *J* = 8.6 Hz, 2H), 6.95 - 6.80 (m, 2H), 6.72 (d, *J* = 2.8 Hz, 1H), 6.65 (d, *J* = 8.6 Hz, 2H), 3.84 - 3.67 (m, 4H), 3.22 (s, 3H), 3.05 - 2.76 (m, 4H). <sup>13</sup>C NMR (125 MHz, MeOD) δ 153.3, 149.2, 147.1, 135.2, 127.7 (d, *J*<sub>CF</sub> = 267.5 Hz), 127.0 (q, *J*<sub>CF</sub> = 3.75 Hz), 119.2 (d, *J*<sub>CF</sub> = 32.5 Hz), 118.5, 118.4, 118.2, 113.5, 68.0, 52.1, 39.4. HRMS (ESI) *m/z* calcd for C<sub>18</sub>H<sub>20</sub>F<sub>3</sub>N<sub>2</sub>O<sub>2</sub><sup>+</sup>

[M+H]<sup>+</sup> 353.1471, found 353.1472.

**2-((4-fluorophenyl)(methyl)amino)-4-morpholinopheno(3m):** purified by SiO<sub>2</sub> column chromatography

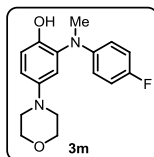

(hexane/EtOAc = 15:1) to give red oil, 42 mg, 47 % yield. <sup>1</sup>H NMR (500 MHz, Chloroform-*d*) δ 6.98 (d, *J* = 8.8 Hz, 1H), 6.91 (t, *J* = 8.7 Hz, 2H), 6.81 (dd, *J* = 8.9, 2.9 Hz, 1H), 6.70 - 6.60 (m, 3H), 5.78 (s, 1H), 3.98 - 3.53 (m, 4H), 3.16 (s, 3H), 3.06 - 2.92 (m, 4H). <sup>13</sup>C NMR (125 MHz, CDCl<sub>3</sub>) δ 157.7 (d, *J*<sub>CF</sub> = 236.3 Hz), 146.8, 146.2, 145.6 (d, *J*<sub>CF</sub> = 1.3 Hz), 135.9, 116.4, 115.9 (d, *J*<sub>CF</sub> = 7.5 Hz), 115.7, 115.6 (d, *J*<sub>CF</sub> = 22.5 Hz), 114.8, 66.9, 50.6, 40.2. HRMS (ESI) *m/z* calcd for C<sub>17</sub>H<sub>20</sub>FN<sub>2</sub>O<sub>2</sub><sup>+</sup>

[M+H]<sup>+</sup> 303.1503, found 303.1503.

**2-((4-chlorophenyl)(methyl)amino)-4-morpholinopheno(3n):** purified by SiO<sub>2</sub> column chromatography

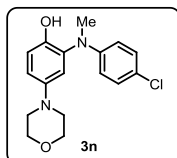

(hexane/EtOAc = 15:1) to give yellow solid, 53 mg, 55 % yield. <sup>1</sup>H NMR (500 MHz, Methanol-*d*<sub>4</sub>) δ 7.05 (d, *J* = 9.1 Hz, 2H), 6.88 (d, *J* = 8.9 Hz, 1H), 6.80 (dd, *J* = 8.9, 2.9 Hz, 1H), 6.69 (d, *J* = 3.0 Hz, 1H), 6.56 (d, *J* = 9.1 Hz, 2H), 3.81 - 3.67 (m, 4H), 3.15 (s, 3H), 2.99 - 2.83 (m, 4H). <sup>13</sup>C NMR (125 MHz, MeOD) δ 149.6, 149.2, 147.0, 136.3, 129.4, 122.9, 118.3, 118.1, 117.7, 115.8, 67.9, 52.1, 39.6. HRMS (ESI) *m/z* calcd for C<sub>17</sub>H<sub>20</sub>ClN<sub>2</sub>O<sub>2</sub><sup>+</sup> [M+H]<sup>+</sup> 319.1208, found 319.1205.

**2-((4-bromophenyl)(methyl)amino)-4-morpholinopheno(3o):** purified by SiO<sub>2</sub> column chromatography

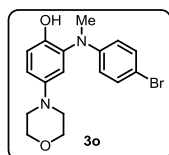

(hexane/EtOAc = 15:1) to give light yellow solid, 62 mg, 57 % yield. 434.4 mg, 40% yield 3mmol scale. <sup>1</sup>H NMR (500 MHz, Methanol-*d*<sub>4</sub>) δ 7.21 (d, *J* = 9.0 Hz, 2H), 6.89 (d, *J* = 8.8 Hz, 1H), 6.87 - 6.79 (m, 1H), 6.72 (d, *J* = 2.9 Hz, 1H), 6.54 (d, *J* = 9.1 Hz, 2H), 3.85 - 3.74 (m, 4H), 3.17 (s, 3H), 3.02 - 2.92 (m, 4H). <sup>13</sup>C NMR (125 MHz, MeOD) δ 150.1, 149.2, 147.1, 136.2, 132.4, 118.3, 118.2, 117.8, 116.3, 110.0, 68.0, 52.2, 39.5. HRMS (ESI) *m/z* calcd for C<sub>17</sub>H<sub>20</sub>BrN<sub>2</sub>O<sub>2</sub><sup>+</sup> [M+H]<sup>+</sup> 363.0703,

found 363.0703.

**2-((3-methoxyphenyl)(methyl)amino)-4-morpholinopheno(3p):** purified by SiO<sub>2</sub> column

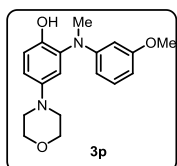

chromatography (hexane/EtOAc = 15:1) to give yellow solid, 62 mg, 66 % yield. <sup>1</sup>H NMR (500 MHz, Methanol-*d*<sub>4</sub>) δ 7.02 (t, *J* = 8.2 Hz, 1H), 6.88 (d, *J* = 8.7 Hz, 1H), 6.81 (dd, *J* = 8.8, 2.9 Hz, 1H), 6.71 (d, *J* = 2.9 Hz, 1H), 6.30 - 6.23 (m, 2H), 6.18 (t, *J* = 2.4 Hz, 1H), 3.79 - 3.74 (m, 4H), 3.67 (s, 3H), 3.15 (s, 3H), 2.97 - 2.90 (m, 4H). <sup>13</sup>C NMR (125 MHz, MeOD) δ 160.5, 150.9, 147.9,

145.6, 135.4, 129.0, 117.0, 116.7, 116.2, 106.6, 102.2, 99.8, 66.6, 54.0, 50.9, 38.2. HRMS (ESI) *m/z* calcd for

$C_{18}H_{23}N_2O_3^+$   $[M+H]^+$  315.1703, found 315.1698.

**2-(methyl(*m*-tolyl)amino)-4-morpholinophenol(3q):** purified by  $SiO_2$  column chromatography (hexane/EtOAc = 15:1)

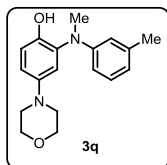

to give brown oil, 59 mg, 66 % yield.  $^1H$  NMR (500 MHz, Methanol- $d_4$ )  $\delta$  6.99 (t,  $J$  = 7.8 Hz, 1H), 6.88 (d,  $J$  = 8.8 Hz, 1H), 6.84 - 6.77 (m, 1H), 6.69 (d,  $J$  = 2.9 Hz, 1H), 6.51 (d,  $J$  = 8.2 Hz, 1H), 6.49 - 6.42 (m, 2H), 3.80 - 3.64 (m, 4H), 3.14 (s, 3H), 3.03 - 2.83 (m, 4H), 2.21 (s, 3H).  $^{13}C$  NMR (125 MHz, MeOD)  $\delta$  151.0, 149.3, 147.0, 139.3, 137.2, 129.6, 119.4, 118.2, 118.0, 117.4, 115.6, 112.3, 68.0, 52.3, 39.6, 21.9. HRMS (ESI)  $m/z$  calcd for  $C_{18}H_{23}N_2O_2^+$   $[M+H]^+$  299.1754, found 299.1757.

**2-((2-isopropylphenyl)(methyl)amino)-4-morpholinophenol(3r):** purified by  $SiO_2$  column chromatography

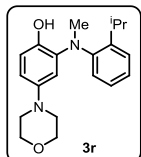

(hexane/EtOAc = 15:1) to give brown solid, 38 mg, 39 % yield.  $^1H$  NMR (500 MHz, Chloroform- $d$ )  $\delta$  6.95 - 6.84 (m, 5H), 6.79 (dd,  $J$  = 8.6, 2.8 Hz, 1H), 6.59 (d,  $J$  = 8.6 Hz, 1H), 3.92 - 3.83 (m, 4H), 3.59 (s, 1H), 3.09 (dd,  $J$  = 5.7, 3.9 Hz, 4H), 2.88 (s, 3H), 2.87 - 2.82 (m, 1H), 1.23 (d,  $J$  = 6.8 Hz, 6H).  $^{13}C$  NMR (125 MHz,  $CDCl_3$ )  $\delta$  152.6, 148.6, 146.6, 142.1, 134.1, 118.3, 117.4, 117.1, 116.8, 110.6, 67.0, 50.4, 31.4, 27.2, 22.2. HRMS (ESI)  $m/z$  calcd for  $C_{20}H_{27}N_2O_2^+$   $[M+H]^+$  327.2067, found 327.2065.

**2-(methyl(naphthalen-1-yl)amino)-4-morpholinophenol(3s):** purified by  $SiO_2$  column chromatography

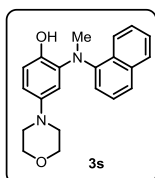

(hexane/EtOAc = 15:1) to give dark green solid, 69 mg, 69 % yield.  $^1H$  NMR (500 MHz, Chloroform- $d$ )  $\delta$  8.16 - 8.09 (m, 1H), 7.88 - 7.75 (m, 1H), 7.52 - 7.41 (m, 2H), 6.99 (d,  $J$  = 8.2 Hz, 1H), 6.93 (d,  $J$  = 9.1 Hz, 2H), 6.86 (d,  $J$  = 9.1 Hz, 2H), 6.52 (d,  $J$  = 8.2 Hz, 1H), 4.32 (s, 1H), 4.06 - 3.72 (m, 4H), 3.17 - 3.03 (m, 4H), 3.00 (s, 3H).  $^{13}C$  NMR (125 MHz,  $CDCl_3$ )  $\delta$  153.2, 146.5, 144.2, 141.2, 127.7, 125.8, 125.3, 124.5, 122.8, 120.1, 117.8, 117.4, 115.7, 103.3, 66.9, 50.4, 31.2. HRMS (ESI)  $m/z$  calcd for  $C_{21}H_{23}N_2O_2^+$   $[M+H]^+$  335.1754, found 335.1753.

**2-(ethyl(phenyl)amino)-4-morpholinophenol(3t),** purified by  $SiO_2$  column chromatography (hexane/EtOAc = 15:1)

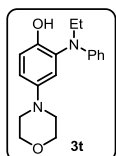

to give black oil, 56mg, 63 % yield.  $^1H$  NMR (400 MHz, Methanol- $d_4$ )  $\delta$  7.14 - 7.01 (m, 2H), 6.93 - 6.79 (m, 2H), 6.69 (d,  $J$  = 2.8 Hz, 1H), 6.61 (t,  $J$  = 9.1 Hz, 3H), 3.81 - 3.71 (m, 4H), 3.61 (q,  $J$  = 7.1 Hz, 2H), 3.01 - 2.87 (m, 4H), 1.16 (t,  $J$  = 7.1 Hz, 3H).  $^{13}C$  NMR (125 MHz,  $CDCl_3$ )  $\delta$  148.3, 147.8, 146.2, 133.2, 129.3, 118.7, 116.8, 116.7, 115.8, 114.6, 67.0, 50.8, 45.8, 12.7. HRMS (ESI)  $m/z$  calcd for  $C_{18}H_{23}N_2O_2^+$   $[M+H]^+$  299.1754, found 299.1755.

**2-morpholinophenol (4a).** Known compound,<sup>3</sup> General Procedure A, purified by  $SiO_2$  column chromatography

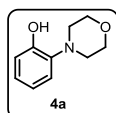

(hexane/EtOAc = 20:1), yellow solid, 134 mg 75% yield (1 mmol).  $^1H$  NMR (400 MHz, Chloroform- $d$ )  $\delta$  7.17 (dd,  $J$  = 7.8, 1.5 Hz, 1H), 7.09 (td,  $J$  = 7.8, 1.5 Hz, 1H), 6.96 (dd,  $J$  = 8.1, 1.5 Hz, 1H), 6.88 (td,  $J$  = 7.6, 1.5 Hz, 1H), 3.87 (dd,  $J$  = 5.7, 3.6 Hz, 4H), 3.02 - 2.65 (m, 4H).  $^{13}C$  NMR (125 MHz,  $CDCl_3$ )  $\delta$  151.47, 138.69, 126.71, 126.69, 121.45, 120.21, 114.35, 67.58, 52.83.

**2,6-dimethyl-4-morpholinophenol (4e).** Known compound,<sup>1</sup> General Procedure B, purified by  $SiO_2$  column

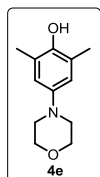

chromatography (hexane/EtOAc = 20:1), orange solid, 137 mg 66% yield (1 mmol).  $^1H$  NMR (400 MHz, Methanol- $d_4$ )  $\delta$  6.70 (d,  $J$  = 3.2 Hz, 2H), 3.90 (d,  $J$  = 4.7 Hz, 4H), 3.08 (d,  $J$  = 4.7 Hz, 4H), 2.32 (d,  $J$  = 3.4 Hz, 6H).  $^{13}C$  NMR (125 MHz, MeOD)  $\delta$  147.48, 144.49, 125.33, 117.28, 66.77, 51.20, 16.09, 16.07.

2-((4-methoxyphenyl)(methyl)amino)-6-morpholinophenol (**4f**), purified by SiO<sub>2</sub> column chromatography (hexane/EtOAc = 20:1) to give yellow oil, 16mg, 17 % yield. <sup>1</sup>H NMR (400 MHz, Chloroform-*d*) δ 6.84 – 6.74 (m, 3H), 6.71 – 6.55 (m, 4H), 4.02 (br, 1H), 3.76 (s, 4H), 3.72 (s, 3H), 3.13 (s, 4H), 2.80 (s, 3H). <sup>13</sup>C NMR (100 MHz, CDCl<sub>3</sub>) δ 152.50, 151.84, 143.54, 140.78, 135.98, 115.58, 114.57, 113.12, 112.31, 111.32, 55.88, 55.75, 39.46, 31.28. HRMS (ESI) *m/z* calcd for C<sub>18</sub>H<sub>23</sub>N<sub>2</sub>O<sub>3</sub><sup>+</sup> [M+H]<sup>+</sup> 315.1703, found 315.1699.

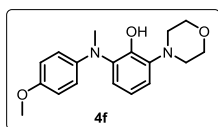

2-(methyl(phenyl)amino)-4-morpholinophenyl 4-nitrobenzoate (**5a**): purified by SiO<sub>2</sub> column chromatography (hexane/EtOAc = 20:1) to give red solid. <sup>1</sup>H NMR (400 MHz, Chloroform-*d*) δ = 8.13 (d, *J* = 8.7 Hz, 2H), 7.81 (d, *J* = 8.9 Hz, 2H), 7.17 (d, *J* = 8.8 Hz, 1H), 7.14 - 7.08 (m, 2H), 6.90 (d, *J* = 2.9 Hz, 1H), 6.81 (dd, *J* = 8.9, 2.9 Hz, 1H), 6.74 (t, *J* = 7.3 Hz, 1H), 6.68 (d, *J* = 7.6 Hz, 2H), 3.96 - 3.82 (t, 4H), 3.25 (s, *J* = 6.0, 3H), 3.22 - 3.12 (t, *J* = 6.0, 4H). <sup>13</sup>C NMR (100 MHz, CDCl<sub>3</sub>) δ 163.3, 150.8, 150.4, 148.3, 140.5, 139.2, 134.5, 130.9, 128.8, 123.5, 123.2, 118.6, 114.9, 114.8, 112.6, 66.7, 49.2, 39.6. HRMS (ESI) *m/z* calcd for C<sub>24</sub>H<sub>24</sub>N<sub>3</sub>O<sub>5</sub><sup>+</sup> [M+H]<sup>+</sup> 434.17105, found 434.17108.

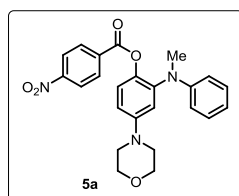

## 6.2 X-ray structure of **5a**.

Suitable crystals of compound **5a** was obtained by slowly evaporating a mixture of CHCl<sub>3</sub> and n-hexane solution (CHCl<sub>3</sub>: n-hexane = 1:8) at ambient temperature. For 4 days, a colorless crystal of **5a** was mounted on a glass fiber at a random orientation. The data were collected by a diffractometer Rigaku Oxford Diffraction Supernova Dual Source, Cu at Zero equipped with an AtlasS2 CCD using Cu Kα radiation (1.54178 Å) by using a  $\omega$  scan mode. The structures were solved by direct methods using Olex2 software, and the nonhydrogen atoms were located from the trial structure and then refined anisotropically with XL using a full-matrix least squares procedure based on F2. The weighted R factor, wR and goodness-of-fit S values were obtained based on F2. The hydrogen atom positions were fixed geometrically at the calculated distances and allowed to ride on the parent atoms.

Compound **5a** was collected at 100 K on a Rigaku Oxford Diffraction Supernova Dual Source, Cu at Zero equipped with an AtlasS2 CCD using Cu Kα radiation. The data were collected and processed using CrysAlisPro. The structures were solved by direct methods using Olex2 software, and the non-hydrogen atoms were located from the trial structure and then refined anisotropically with SHELXL-2018 using a full-matrix least squares procedure based on F2. The weighted R factor, wR and goodness-of-fit S values were obtained based on F2. The hydrogen atom positions were fixed geometrically at the calculated distances and allowed to ride on their parent atoms. Crystallographic data for the structure reported in this paper have been deposited at the Cambridge Crystallographic Data Center and allocated with the deposition numbers: CCDC 2090410.

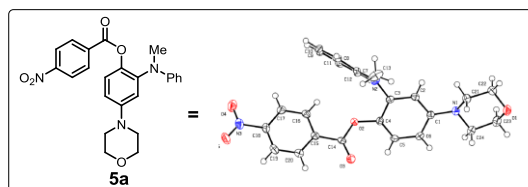

|                     |                                                               |
|---------------------|---------------------------------------------------------------|
| Identification code | 2090410                                                       |
| Empirical formula   | C <sub>24</sub> H <sub>23</sub> N <sub>3</sub> O <sub>5</sub> |
| Formula weight      | 433.45                                                        |
| Temperature/K       | 100.00(10)                                                    |

|                                                |                                                                  |
|------------------------------------------------|------------------------------------------------------------------|
| Crystal system                                 | orthorhombic                                                     |
| Space group                                    | Pbca                                                             |
| a/Å                                            | 15.1398(8)                                                       |
| b/Å                                            | 11.4003(6)                                                       |
| c/Å                                            | 24.1150(15)                                                      |
| $\alpha/^\circ$                                | 90                                                               |
| $\beta/^\circ$                                 | 90                                                               |
| $\gamma/^\circ$                                | 90                                                               |
| Volume/Å <sup>3</sup>                          | 4162.2(4)                                                        |
| Z                                              | 8                                                                |
| $\rho_{\text{calc}}/\text{g/cm}^3$             | 1.383                                                            |
| $\mu/\text{mm}^{-1}$                           | 0.098                                                            |
| F(000)                                         | 1824.0                                                           |
| Crystal size/mm <sup>3</sup>                   | 0.14 × 0.13 × 0.12                                               |
| Radiation                                      | MoK $\alpha$ ( $\lambda = 0.71073$ )                             |
| 2 $\theta$ range for data collection/ $^\circ$ | 4.318 to 49.99                                                   |
| Index ranges                                   | -17 ≤ h ≤ 18, -13 ≤ k ≤ 9, -28 ≤ l ≤ 23                          |
| Reflections collected                          | 10556                                                            |
| Independent reflections                        | 3660 [ $R_{\text{int}} = 0.0299$ , $R_{\text{sigma}} = 0.0357$ ] |
| Data/restraints/parameters                     | 3660/0/290                                                       |
| Goodness-of-fit on F <sup>2</sup>              | 1.079                                                            |
| Final R indexes [ $I \geq 2\sigma(I)$ ]        | $R_1 = 0.0415$ , $wR_2 = 0.0907$                                 |
| Final R indexes [all data]                     | $R_1 = 0.0512$ , $wR_2 = 0.0953$                                 |
| Largest diff. peak/hole / e Å <sup>-3</sup>    | 0.17/-0.24                                                       |

#### Crystal structure determination of 5a.

**Crystal Data** for C<sub>24</sub>H<sub>23</sub>N<sub>3</sub>O<sub>5</sub> ( $M = 433.45$  g/mol): orthorhombic, space group Pbca (no. 61),  $a = 15.1398(8)$  Å,  $b = 11.4003(6)$  Å,  $c = 24.1150(15)$  Å,  $V = 4162.2(4)$  Å<sup>3</sup>,  $Z = 8$ ,  $T = 100.00(10)$  K,  $\mu(\text{MoK}\alpha) = 0.098$  mm<sup>-1</sup>,  $D_{\text{calc}} = 1.383$  g/cm<sup>3</sup>, 10556 reflections measured ( $4.318^\circ \leq 2\theta \leq 49.99^\circ$ ), 3660 unique ( $R_{\text{int}} = 0.0299$ ,  $R_{\text{sigma}} = 0.0357$ ) which were used in all calculations. The final  $R_1$  was 0.0415 ( $I > 2\sigma(I)$ ) and  $wR_2$  was 0.0953 (all data).

**Table S5 Fractional Atomic Coordinates ( $\times 10^4$ ) and Equivalent Isotropic Displacement Parameters (Å<sup>2</sup> $\times 10^3$ ) for 5a.  $U_{\text{eq}}$  is defined as 1/3 of the trace of the orthogonalised  $U_{ij}$  tensor.**

| Atom | x         | y          | z         | U(eq)   |
|------|-----------|------------|-----------|---------|
| O2   | 6260.0(7) | 3849.8(10) | 6342.3(4) | 22.8(3) |
| O3   | 5425.2(7) | 4967.3(10) | 6913.6(5) | 27.1(3) |
| O1   | 8209.8(8) | -866.0(11) | 8752.9(5) | 30.4(3) |
| O4   | 5445.1(8) | 7299.8(12) | 4103.4(5) | 37.3(3) |
| O5   | 4778.1(8) | 8591.0(12) | 4616.7(6) | 41.5(4) |
| N1   | 7550.8(8) | 500.4(12)  | 7844.6(5) | 20.9(3) |
| N2   | 8043.4(8) | 3340.1(12) | 6378.2(5) | 21.6(3) |



|     |            |             |           |         |
|-----|------------|-------------|-----------|---------|
| N3  | 5173.2(9)  | 7659.6(14)  | 4553.8(6) | 29.4(4) |
| C3  | 7445.4(10) | 2783.0(14)  | 6746.7(6) | 17.6(3) |
| C14 | 5738.3(10) | 4777.0(14)  | 6462.5(7) | 18.8(4) |
| C7  | 7889.4(9)  | 3328.6(13)  | 5807.0(6) | 18.2(4) |
| C4  | 6540.9(10) | 3048.4(14)  | 6748.5(6) | 18.6(4) |
| C12 | 7368.0(10) | 2443.2(14)  | 5570.5(6) | 19.9(4) |
| C6  | 6295.4(10) | 1637.2(14)  | 7472.3(6) | 19.3(4) |
| C1  | 7203.2(10) | 1370.3(13)  | 7493.7(6) | 18.1(3) |
| C15 | 5610.8(9)  | 5521.0(14)  | 5959.4(7) | 18.5(4) |
| C2  | 7754.9(10) | 1950.6(14)  | 7117.4(6) | 19.4(4) |
| C16 | 6010.2(10) | 5246.7(14)  | 5457.4(7) | 20.4(4) |
| C5  | 5973.6(10) | 2459.4(14)  | 7097.2(6) | 21.2(4) |
| C17 | 5870.7(10) | 5950.9(14)  | 4996.7(7) | 22.4(4) |
| C18 | 5334.8(10) | 6924.6(15)  | 5049.8(7) | 22.4(4) |
| C8  | 8268.6(11) | 4164.1(14)  | 5453.7(7) | 24.5(4) |
| C11 | 7213.5(11) | 2423.2(16)  | 5006.5(7) | 25.4(4) |
| C20 | 5080.3(10) | 6518.7(14)  | 6002.6(7) | 23.3(4) |
| C19 | 4941.4(10) | 7230.2(15)  | 5546.7(7) | 25.8(4) |
| C24 | 6955.0(11) | -62.1(15)   | 8240.6(7) | 24.2(4) |
| C21 | 8418.7(10) | 734.4(15)   | 8096.8(7) | 25.6(4) |
| C9  | 8100.0(12) | 4130.6(16)  | 4887.3(7) | 31.3(4) |
| C10 | 7567.7(12) | 3271.2(16)  | 4661.4(7) | 30.4(4) |
| C23 | 7391.5(12) | -1131.6(15) | 8489.8(7) | 30.2(4) |
| C22 | 8794.6(11) | -356.7(16)  | 8357.3(7) | 30.4(4) |
| C13 | 8672.4(12) | 4162.0(18)  | 6611.2(8) | 39.8(5) |

**Table S6 Anisotropic Displacement Parameters ( $\text{\AA}^2 \times 10^3$ ) for 5a. The Anisotropic displacement factor exponent takes the form:  $-2\pi^2[h^2a^*U_{11}+2hka^*b^*U_{12}+\dots]$ .**

| Atom | $U_{11}$ | $U_{22}$ | $U_{33}$ | $U_{23}$ | $U_{13}$ | $U_{12}$ |
|------|----------|----------|----------|----------|----------|----------|
| O2   | 24.4(6)  | 22.8(6)  | 21.4(6)  | 4.6(5)   | 4.0(5)   | 8.5(5)   |
| O3   | 31.7(6)  | 28.0(7)  | 21.6(6)  | 0.2(5)   | 4.1(5)   | 7.8(5)   |
| O1   | 38.4(7)  | 32.4(7)  | 20.4(6)  | 4.7(6)   | -2.4(5)  | 7.3(6)   |
| O4   | 37.6(7)  | 45.2(8)  | 29.2(7)  | 11.1(6)  | -6.5(6)  | -3.6(6)  |
| O5   | 33.3(7)  | 35.0(8)  | 56.2(9)  | 18.6(7)  | -2.9(6)  | 9.7(6)   |
| N1   | 22.0(7)  | 22.1(7)  | 18.7(7)  | 2.5(6)   | -1.3(6)  | 1.0(6)   |
| N2   | 21.2(7)  | 23.5(8)  | 20.1(7)  | 0.4(6)   | 0.3(6)   | -7.3(6)  |
| N3   | 19.5(7)  | 31.3(9)  | 37.3(9)  | 10.6(7)  | -7.1(7)  | -4.2(7)  |
| C3   | 19.1(8)  | 18.8(9)  | 14.9(8)  | -3.1(7)  | 0.3(7)   | -1.9(7)  |
| C14  | 13.5(7)  | 18.6(9)  | 24.2(9)  | -2.6(7)  | -1.2(7)  | -0.7(7)  |

|     |          |          |          |          |         |           |
|-----|----------|----------|----------|----------|---------|-----------|
| C7  | 16.7(7)  | 17.5(9)  | 20.5(8)  | 2.1(7)   | 5.0(7)  | 3.9(6)    |
| C4  | 23.1(8)  | 17.5(8)  | 15.1(8)  | 0.3(7)   | -0.4(7) | 2.3(7)    |
| C12 | 20.2(8)  | 19.1(9)  | 20.4(8)  | 1.9(7)   | 2.9(7)  | 1.4(7)    |
| C6  | 21.0(8)  | 20.6(9)  | 16.3(8)  | -0.6(7)  | 3.4(7)  | -2.3(7)   |
| C1  | 22.2(8)  | 17.3(8)  | 15.0(8)  | -2.4(7)  | -0.5(7) | 0.5(7)    |
| C15 | 12.8(7)  | 18.4(9)  | 24.2(8)  | -0.2(7)  | -1.9(7) | -2.4(6)   |
| C2  | 16.6(7)  | 22.0(9)  | 19.5(8)  | -3.4(7)  | -1.7(7) | 1.0(7)    |
| C16 | 15.4(7)  | 18.8(9)  | 27.1(9)  | 0.1(7)   | -0.9(7) | -0.9(6)   |
| C5  | 17.7(8)  | 25.0(9)  | 20.9(8)  | -1.8(7)  | 1.7(7)  | 3.7(7)    |
| C17 | 17.4(8)  | 26.8(10) | 23.0(9)  | 1.6(7)   | -0.6(7) | -4.1(7)   |
| C18 | 16.7(7)  | 22.8(9)  | 27.7(9)  | 7.5(7)   | -6.7(7) | -5.3(7)   |
| C8  | 26.0(9)  | 15.7(9)  | 31.9(10) | 2.0(7)   | 9.3(8)  | 3.4(7)    |
| C11 | 28.1(9)  | 24.9(9)  | 23.3(9)  | -5.1(7)  | -2.0(8) | 9.6(8)    |
| C20 | 20.4(8)  | 24.2(9)  | 25.3(9)  | -1.9(7)  | 0.5(7)  | 1.4(7)    |
| C19 | 20.3(8)  | 21.2(9)  | 35.8(10) | 2.3(8)   | -4.3(8) | 2.9(7)    |
| C24 | 28.3(9)  | 24.4(10) | 19.7(8)  | 2.2(7)   | 0.3(7)  | -2.2(7)   |
| C21 | 23.3(8)  | 30.0(10) | 23.4(9)  | 2.8(8)   | -2.0(7) | 2.8(7)    |
| C9  | 41.0(10) | 23.5(10) | 29.6(10) | 11.0(8)  | 19.1(9) | 13.7(8)   |
| C10 | 41.3(10) | 32.0(11) | 17.9(8)  | 2.5(8)   | 4.0(8)  | 18.8(9)   |
| C23 | 42.8(10) | 24.2(10) | 23.7(9)  | 2.2(8)   | 0.4(8)  | 0.0(8)    |
| C22 | 29.3(9)  | 35.8(11) | 26.0(9)  | 3.3(8)   | 1.5(8)  | 10.0(8)   |
| C13 | 38.2(10) | 49.2(13) | 32.0(10) | -12.6(9) | 7.2(9)  | -24.8(10) |

**Table S7 Bond Lengths for 5a.**

| Atom | Atom | Length/Å   | Atom | Atom | Length/Å |
|------|------|------------|------|------|----------|
| O2   | C14  | 1.3510(19) | C7   | C8   | 1.401(2) |
| O2   | C4   | 1.4053(18) | C4   | C5   | 1.377(2) |
| O3   | C14  | 1.2063(19) | C12  | C11  | 1.380(2) |
| O1   | C23  | 1.424(2)   | C6   | C1   | 1.409(2) |
| O1   | C22  | 1.425(2)   | C6   | C5   | 1.391(2) |
| O4   | N3   | 1.2317(19) | C1   | C2   | 1.399(2) |
| O5   | N3   | 1.2282(19) | C15  | C16  | 1.389(2) |
| N1   | C1   | 1.406(2)   | C15  | C20  | 1.396(2) |
| N1   | C24  | 1.462(2)   | C16  | C17  | 1.387(2) |
| N1   | C21  | 1.472(2)   | C17  | C18  | 1.381(2) |
| N2   | C3   | 1.4188(19) | C18  | C19  | 1.383(2) |
| N2   | C7   | 1.397(2)   | C8   | C9   | 1.390(2) |
| N2   | C13  | 1.449(2)   | C11  | C10  | 1.384(2) |
| N3   | C18  | 1.481(2)   | C20  | C19  | 1.382(2) |

|     |     |          |     |     |          |
|-----|-----|----------|-----|-----|----------|
| C3  | C4  | 1.402(2) | C24 | C23 | 1.511(2) |
| C3  | C2  | 1.385(2) | C21 | C22 | 1.505(2) |
| C14 | C15 | 1.493(2) | C9  | C10 | 1.381(3) |
| C7  | C12 | 1.403(2) |     |     |          |

**Table S8 Bond Angles for 5a.**

| Atom | Atom | Atom | Angle/°    | Atom | Atom | Atom | Angle/°    |
|------|------|------|------------|------|------|------|------------|
| C14  | O2   | C4   | 122.42(12) | C5   | C6   | C1   | 120.75(14) |
| C23  | O1   | C22  | 109.19(13) | N1   | C1   | C6   | 122.66(14) |
| C1   | N1   | C24  | 118.15(12) | C2   | C1   | N1   | 120.02(13) |
| C1   | N1   | C21  | 117.06(13) | C2   | C1   | C6   | 117.16(14) |
| C24  | N1   | C21  | 111.13(12) | C16  | C15  | C14  | 121.61(14) |
| C3   | N2   | C13  | 117.77(13) | C16  | C15  | C20  | 119.93(15) |
| C7   | N2   | C3   | 120.46(12) | C20  | C15  | C14  | 118.46(14) |
| C7   | N2   | C13  | 119.87(14) | C3   | C2   | C1   | 122.71(14) |
| O4   | N3   | C18  | 117.95(15) | C17  | C16  | C15  | 120.10(15) |
| O5   | N3   | O4   | 124.02(15) | C4   | C5   | C6   | 120.49(14) |
| O5   | N3   | C18  | 118.03(15) | C18  | C17  | C16  | 118.73(15) |
| C4   | C3   | N2   | 121.90(14) | C17  | C18  | N3   | 118.49(15) |
| C2   | C3   | N2   | 119.67(13) | C17  | C18  | C19  | 122.41(15) |
| C2   | C3   | C4   | 118.43(14) | C19  | C18  | N3   | 119.10(15) |
| O2   | C14  | C15  | 110.23(13) | C9   | C8   | C7   | 120.24(16) |
| O3   | C14  | O2   | 124.33(15) | C12  | C11  | C10  | 121.02(16) |
| O3   | C14  | C15  | 125.44(14) | C19  | C20  | C15  | 120.40(15) |
| N2   | C7   | C12  | 120.11(14) | C20  | C19  | C18  | 118.42(15) |
| N2   | C7   | C8   | 121.66(14) | N1   | C24  | C23  | 110.11(13) |
| C8   | C7   | C12  | 118.20(15) | N1   | C21  | C22  | 111.11(14) |
| C3   | C4   | O2   | 115.70(13) | C10  | C9   | C8   | 120.95(16) |
| C5   | C4   | O2   | 123.64(14) | C9   | C10  | C11  | 119.00(16) |
| C5   | C4   | C3   | 120.38(14) | O1   | C23  | C24  | 112.70(14) |
| C11  | C12  | C7   | 120.53(15) | O1   | C22  | C21  | 112.41(13) |

**Table S9 Hydrogen Atom Coordinates ( $\text{\AA} \times 10^4$ ) and Isotropic Displacement Parameters ( $\text{\AA}^2 \times 10^3$ ) for 5a.**

| Atom | x       | y       | z       | U(eq) |
|------|---------|---------|---------|-------|
| H12  | 7124.51 | 1864.95 | 5795.48 | 24    |
| H6   | 5906.82 | 1259.29 | 7711.64 | 23    |
| H2   | 8353.88 | 1769.96 | 7116.21 | 23    |

|      |         |          |         |    |
|------|---------|----------|---------|----|
| H16  | 6371.86 | 4589.78  | 5430.12 | 25 |
| H5   | 5370.7  | 2612.59  | 7081.88 | 25 |
| H17  | 6132.95 | 5770.89  | 4658.52 | 27 |
| H8   | 8634.48 | 4743.25  | 5598.63 | 29 |
| H11  | 6865.88 | 1830.6   | 4856.07 | 31 |
| H20  | 4818.88 | 6705.75  | 6340.23 | 28 |
| H19  | 4591.59 | 7898.37  | 5573.53 | 31 |
| H24A | 6414.29 | -291.41  | 8054    | 29 |
| H24B | 6803.8  | 487.79   | 8532.44 | 29 |
| H21A | 8358.23 | 1339.28  | 8377.13 | 31 |
| H21B | 8821.6  | 1020.04  | 7814.72 | 31 |
| H9   | 8349.42 | 4695.25  | 4657.14 | 38 |
| H10  | 7449.02 | 3262.33  | 4283.06 | 36 |
| H23A | 6995.12 | -1480.08 | 8759.45 | 36 |
| H23B | 7493.35 | -1705.15 | 8199.6  | 36 |
| H22A | 8918.76 | -926.54  | 8068.92 | 36 |
| H22B | 9348.06 | -164.35  | 8538.31 | 36 |
| H13A | 8445.18 | 4945.02  | 6577.99 | 60 |
| H13B | 9221.93 | 4104.02  | 6414.49 | 60 |
| H13C | 8766.73 | 3981.37  | 6995.5  | 60 |

## 7. References

1. S. Urgaonkar and J. G. Verkade, *Adv. Synth. Catal.*, 2004, **346**, 611-616.
2. L. Li, A. Wang, B. Wang, M. Liu, K. Lv, Z. Tao, C. Ma, X. Ma, B. Han, A. Wang and Y. Lu, *Chinese Chem. Lett.*, 2020, **31**, 409-412.
3. C. Dinesh, K. Vinayak, P. Sunil Kumar, Pat., WO 2014/111871 A1.
4. J. Tappen, I. Rodstein, K. McGuire, A. Großjohann, J. Löffler, T. Scherpf and V. H. Gessner, *Chem. Eur. J.*, 2020, **26**, 4281-4288.

## 8. NMR Spectra

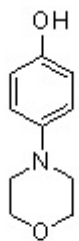

1r

1a

400 MHz CD<sub>3</sub>OD

6.85  
6.85  
6.84  
6.83  
6.71  
6.71  
6.70  
6.69

4.87 MeOD

3.80  
3.79  
3.78  
3.33 MeOH  
3.30 MeOD  
3.30 MeOD  
3.29 MeOD  
3.29 MeOD  
3.28 MeOD  
2.98  
2.97  
2.96

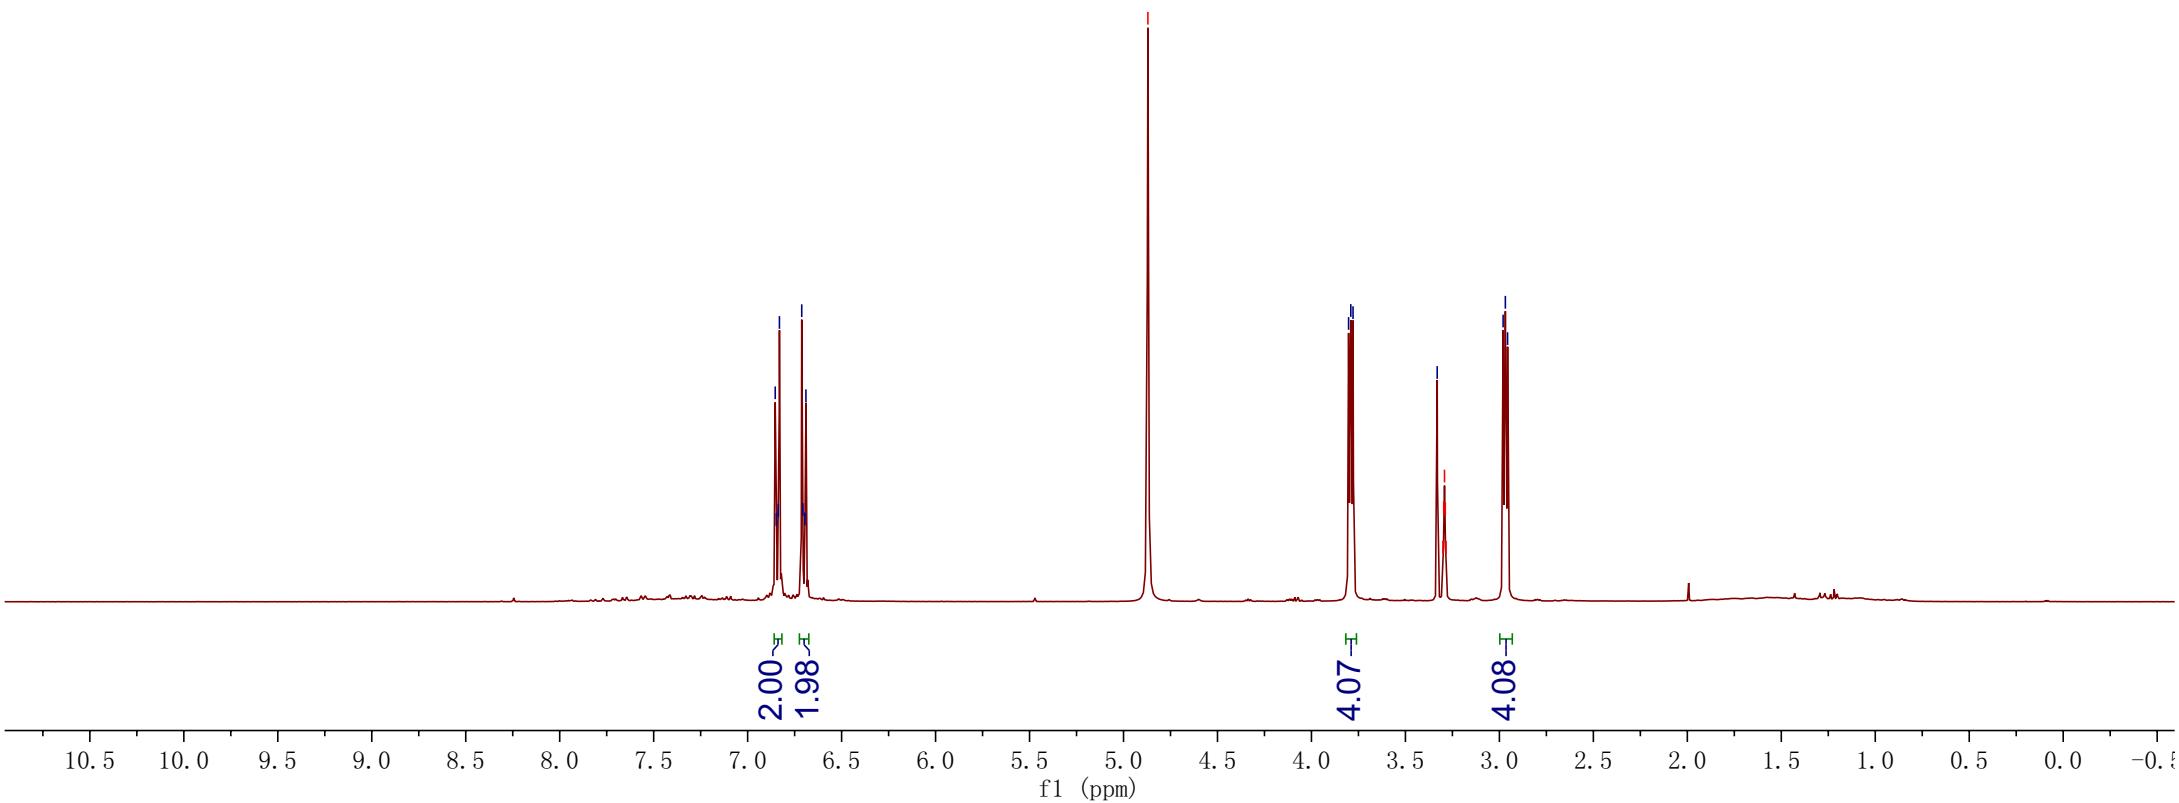

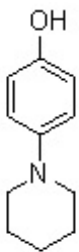

1b

500 MHz CD<sub>3</sub>OD

d-1/10  
020-2} ZHL 20

6.86  
6.84  
6.68  
6.67

4.87 MeOD

3.31 CH3OH  
3.28 MeOD  
3.28 MeOD  
3.28 MeOD  
3.27 MeOD  
3.27 MeOD  
2.92  
2.91  
2.89  
1.70  
1.69  
1.68  
1.67  
1.65  
1.52  
1.52  
1.51  
1.50  
1.49  
1.49  
1.48

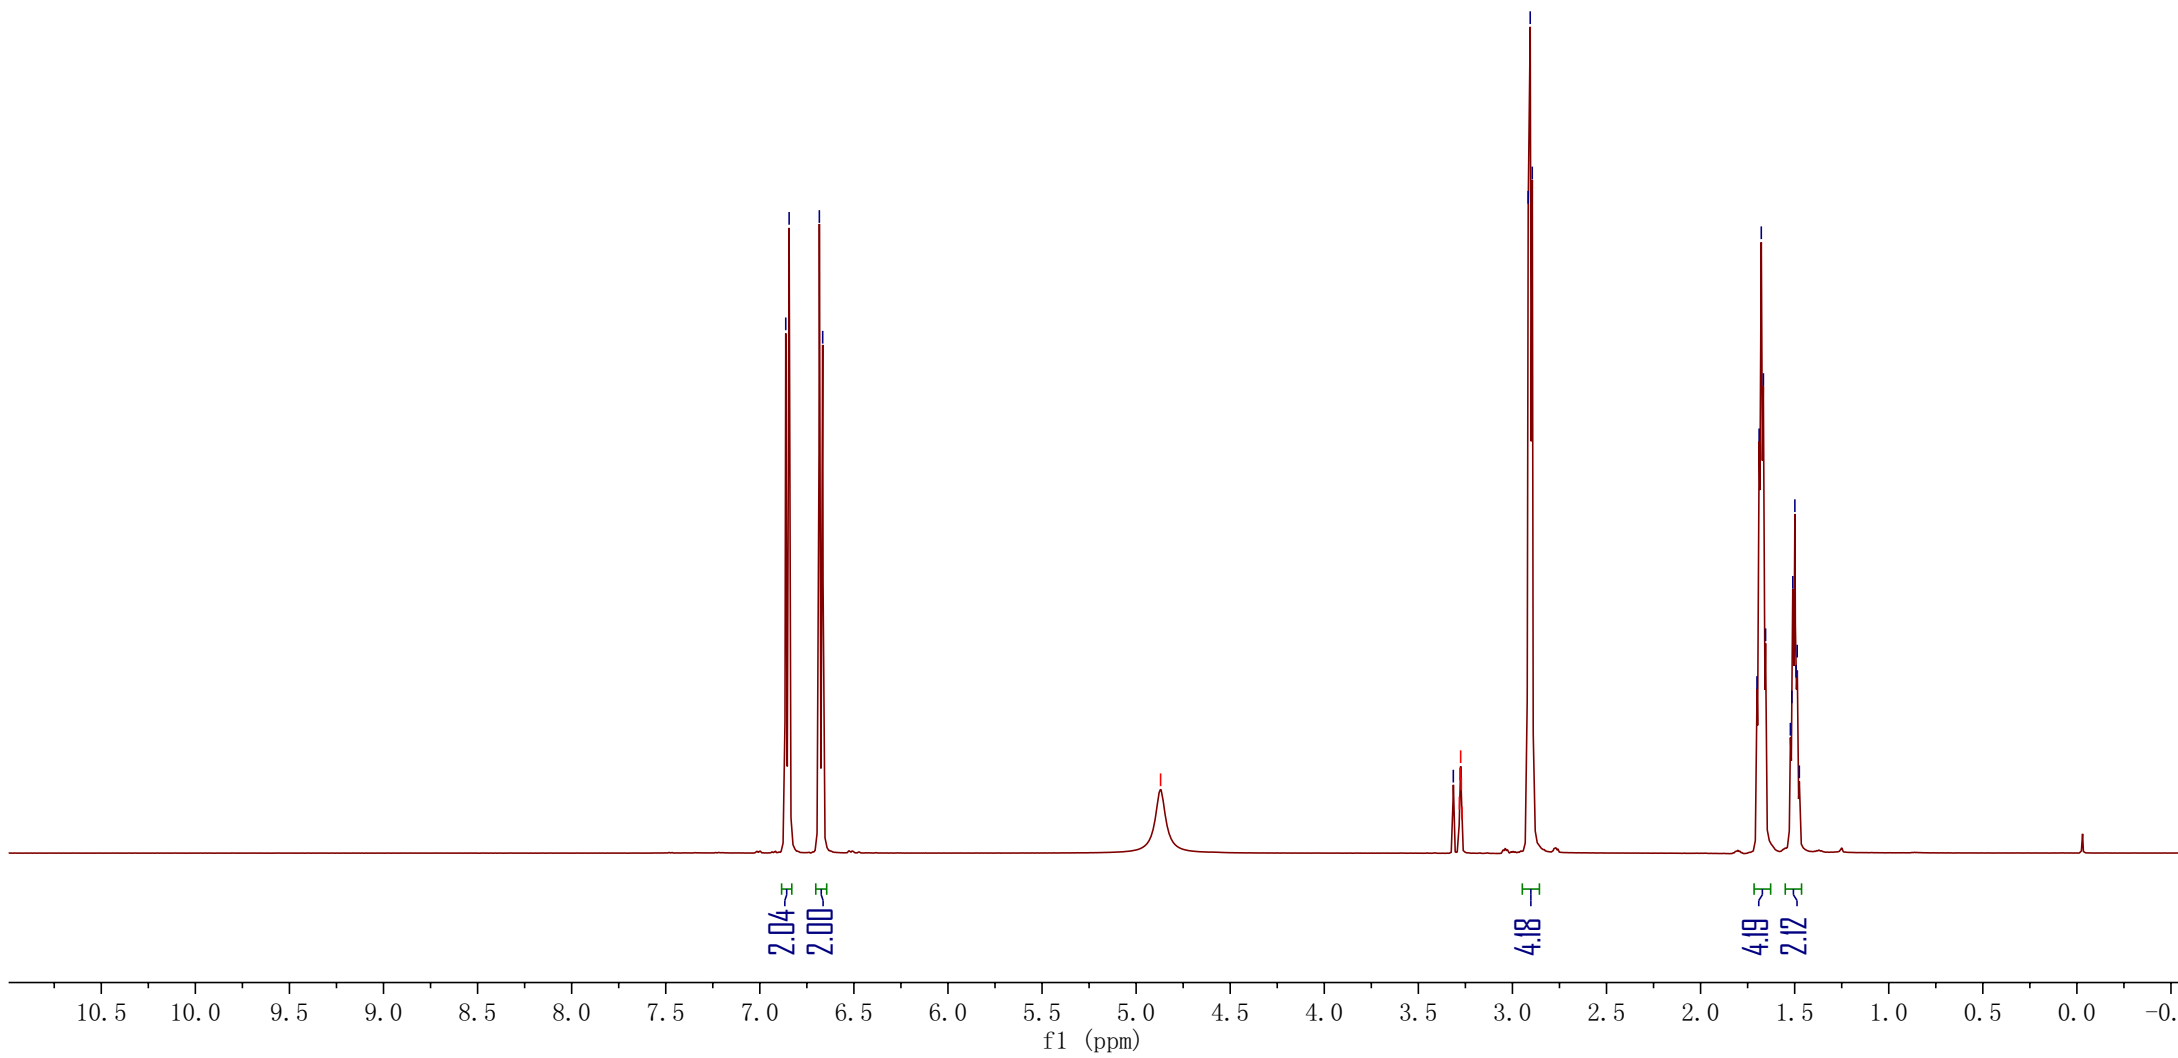

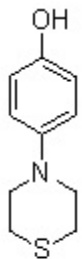

1c

500 MHz CD<sub>3</sub>OD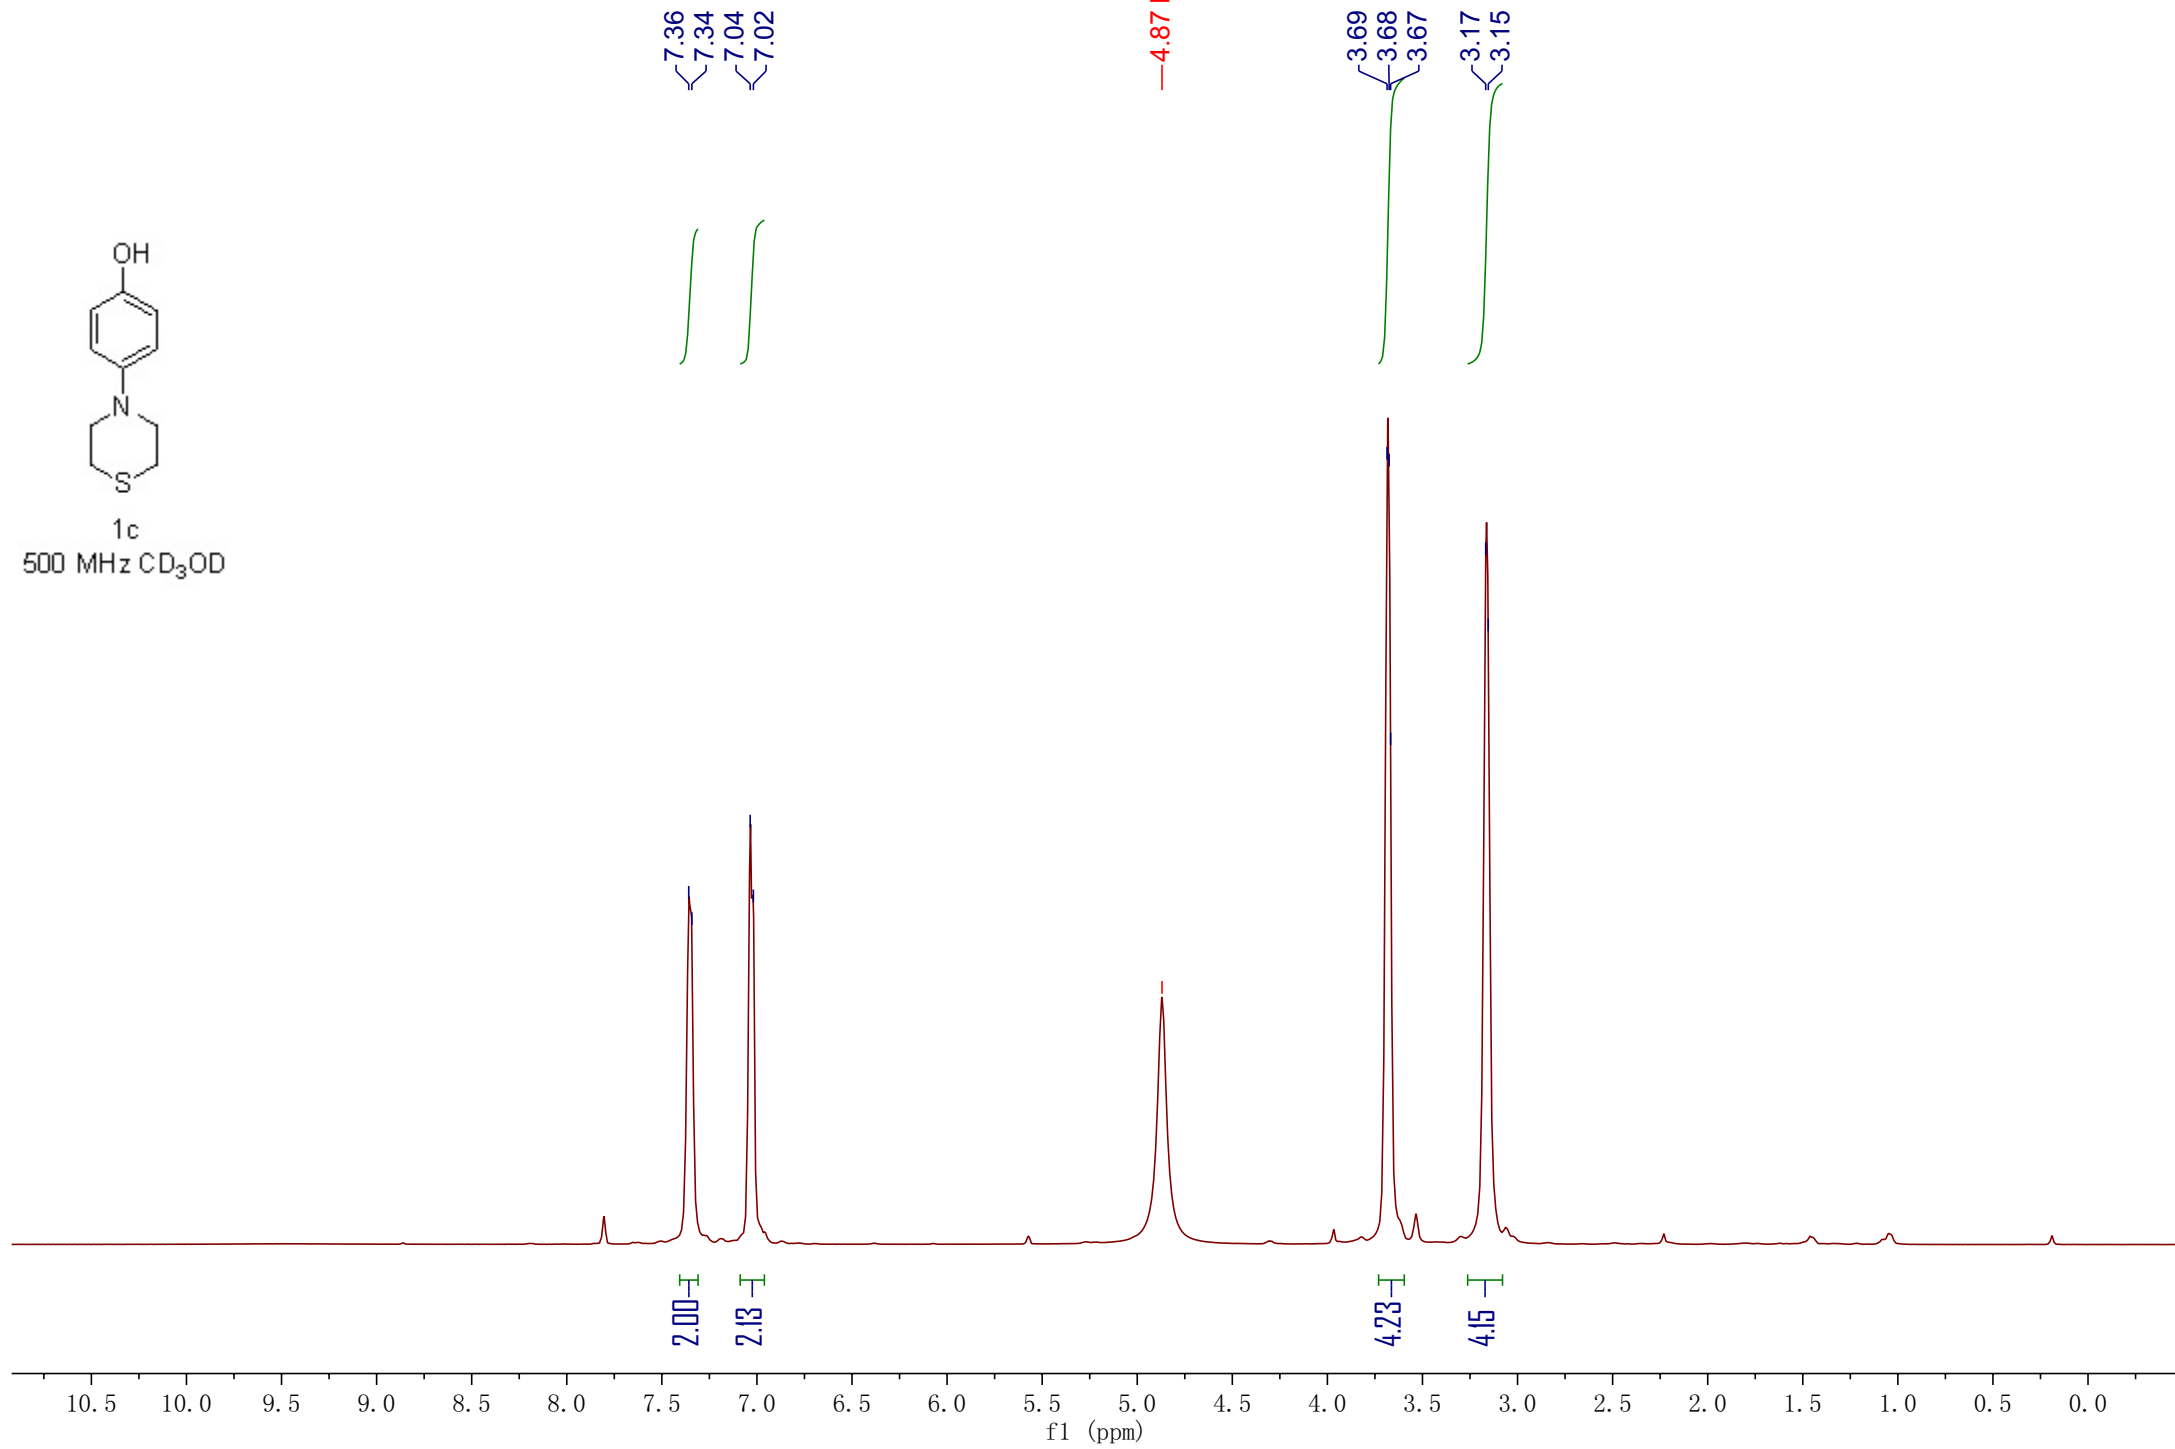

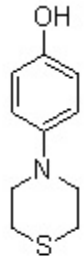

1c

500 MHz CD<sub>3</sub>OD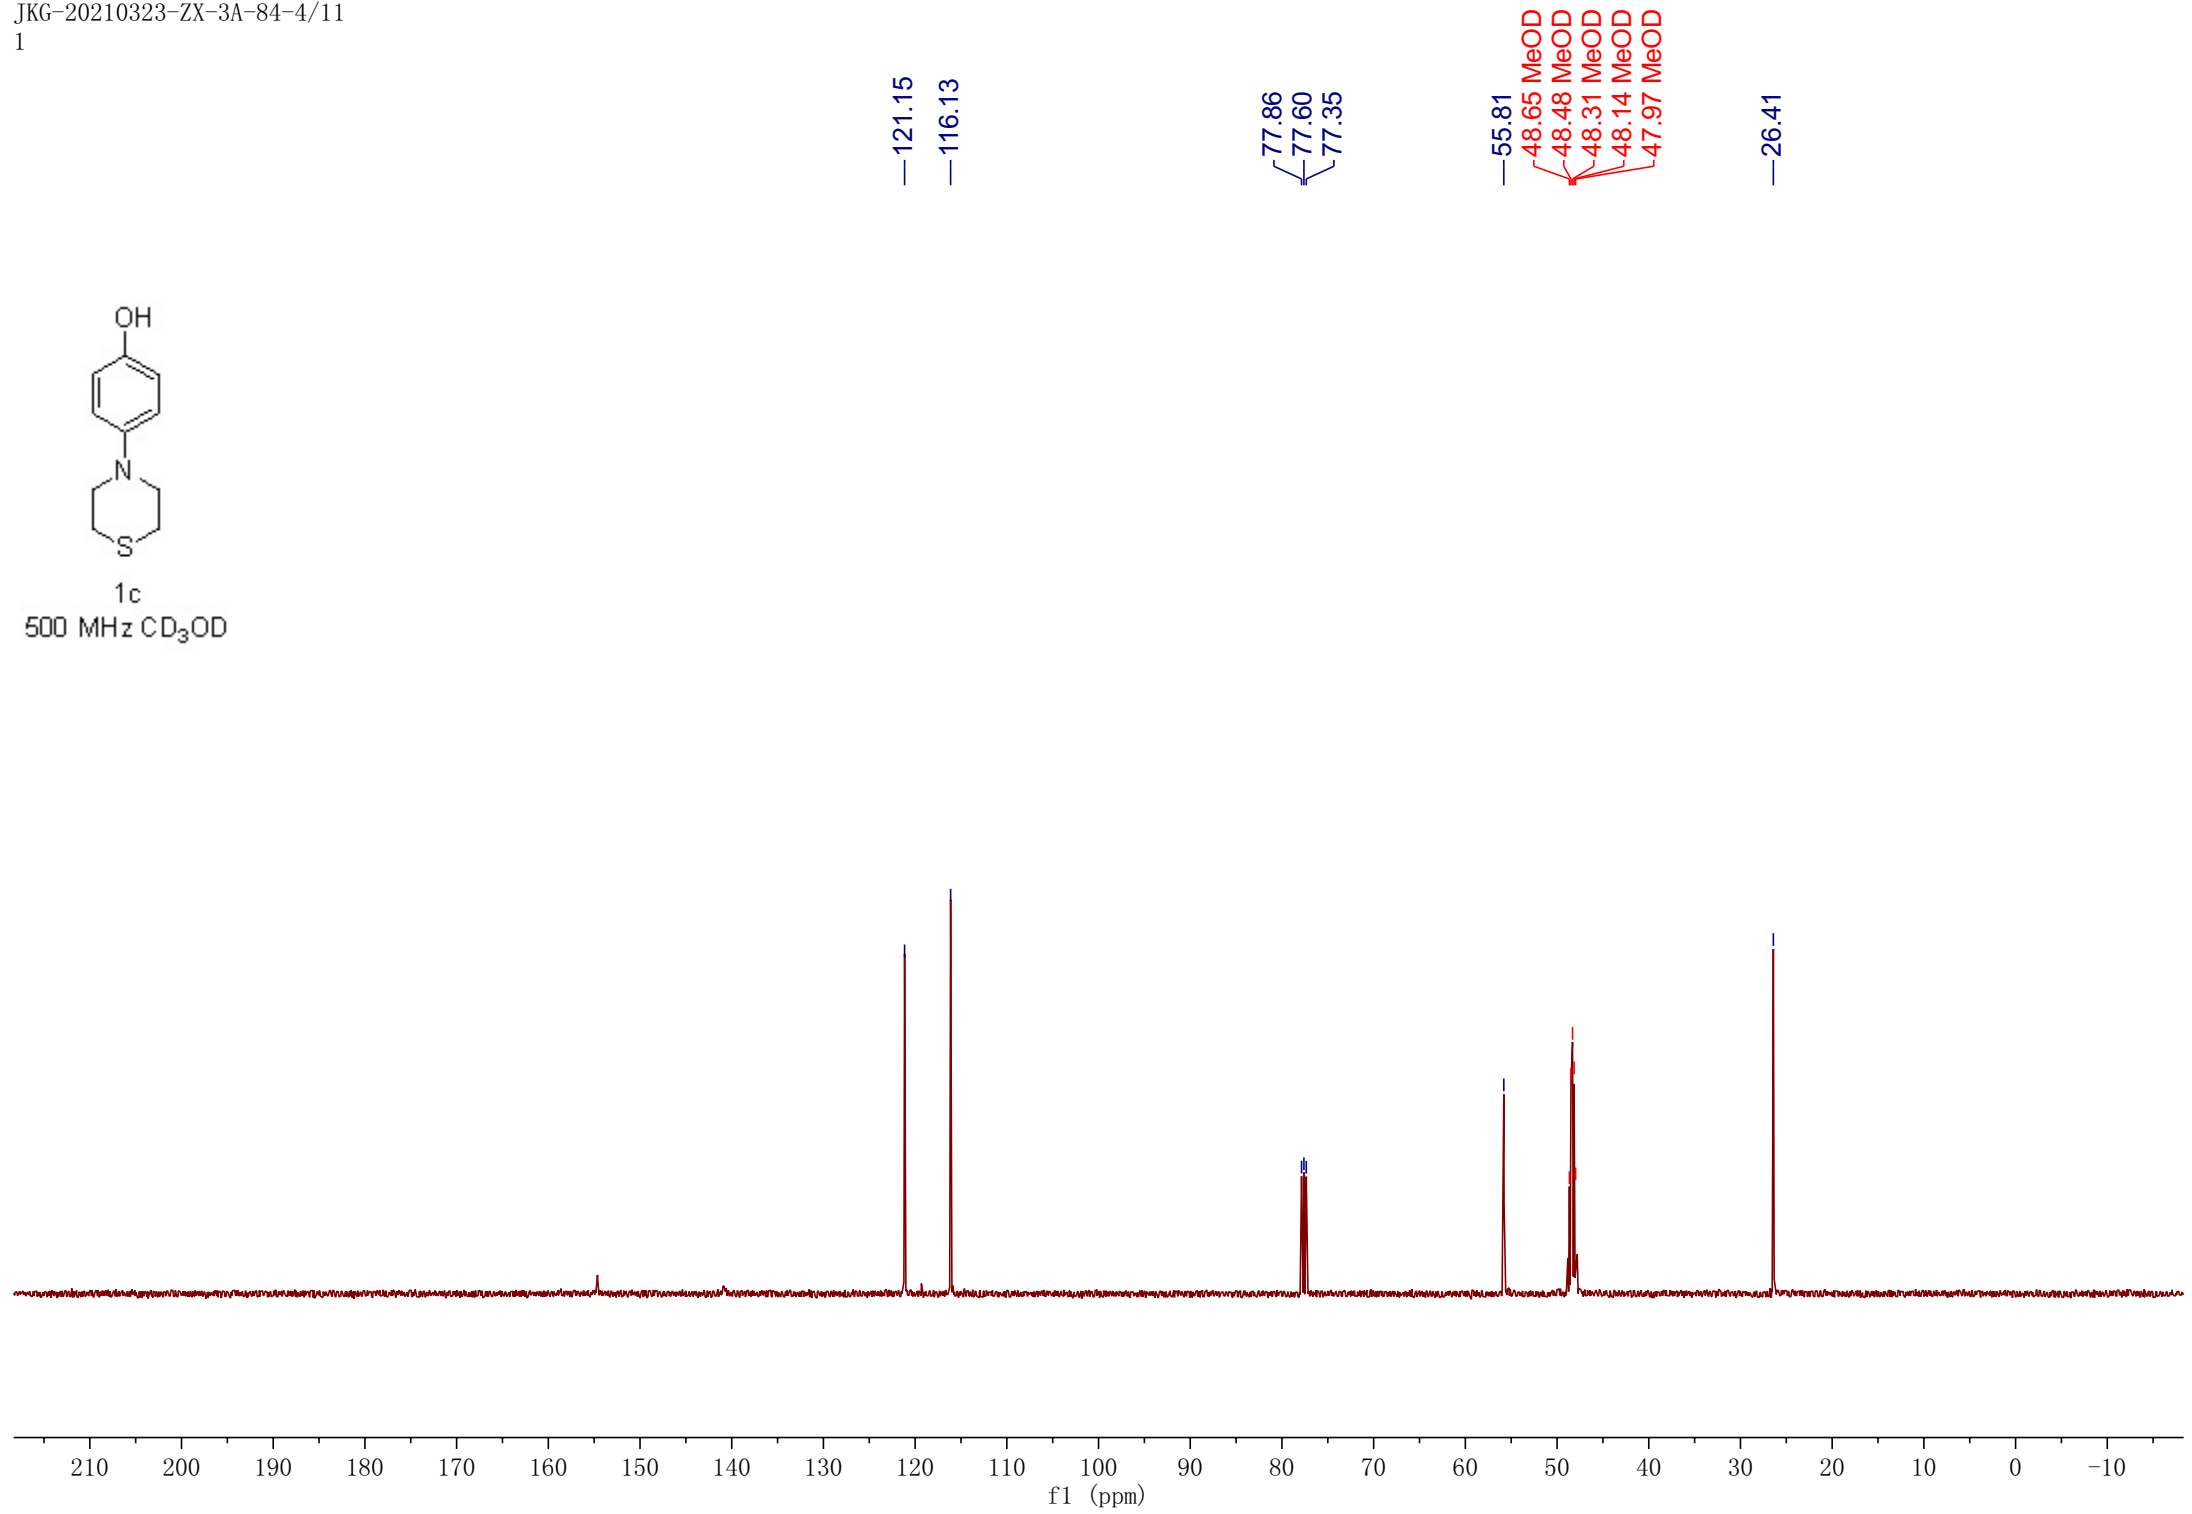



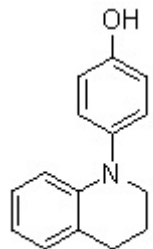

1d

500 MHz CD<sub>3</sub>OD

6.98  
6.96  
6.88  
6.87  
6.79  
6.78  
6.75  
6.74  
6.72  
6.51  
6.50  
6.48  
6.33  
6.31

4.87 MeOD

3.43  
3.42  
3.41  
3.34 MeOH  
3.31 MeOD  
3.31 MeOD  
3.31 MeOD  
3.30 MeOD  
3.30 MeOD  
2.76  
2.74  
2.73  
1.96  
1.95  
1.94  
1.94  
1.93  
1.91

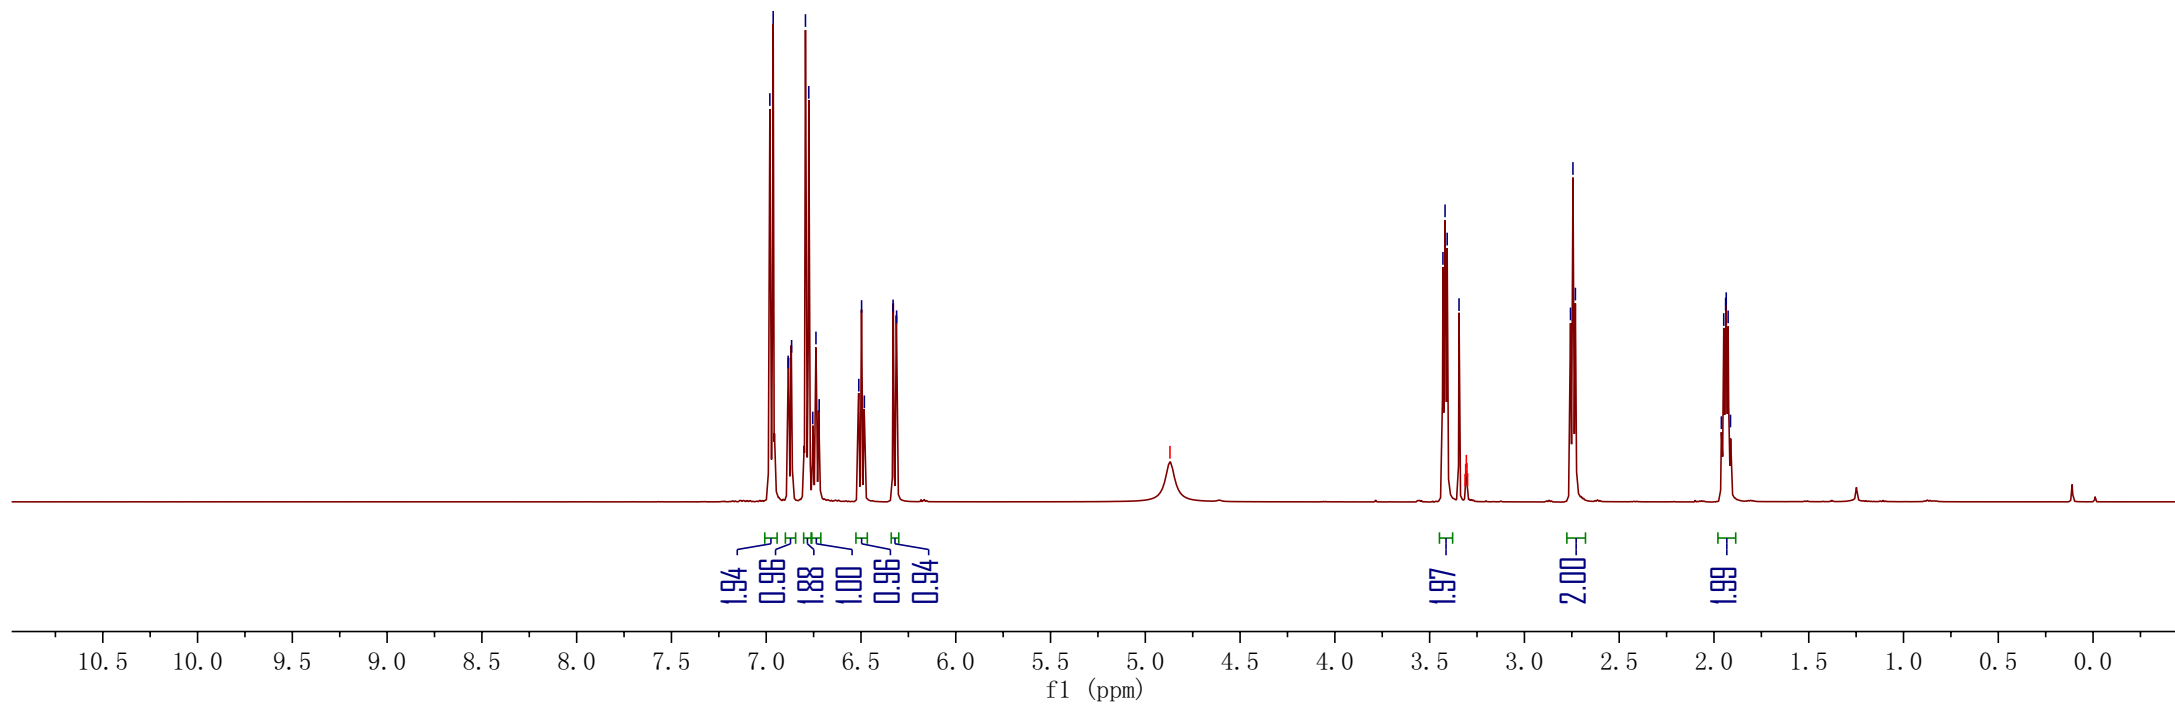

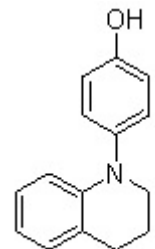

1d

500 MHz CD<sub>3</sub>OD

— 153.67  
— 145.02  
— 139.85  
— 128.06  
— 126.89  
— 125.21  
— 121.96  
— 116.05  
— 115.16  
— 113.41

50.96  
— 47.34 MeOD  
— 47.17 MeOD  
— 47.00 MeOD  
— 46.83 MeOD  
— 46.66 MeOD

— 26.84  
— 21.61

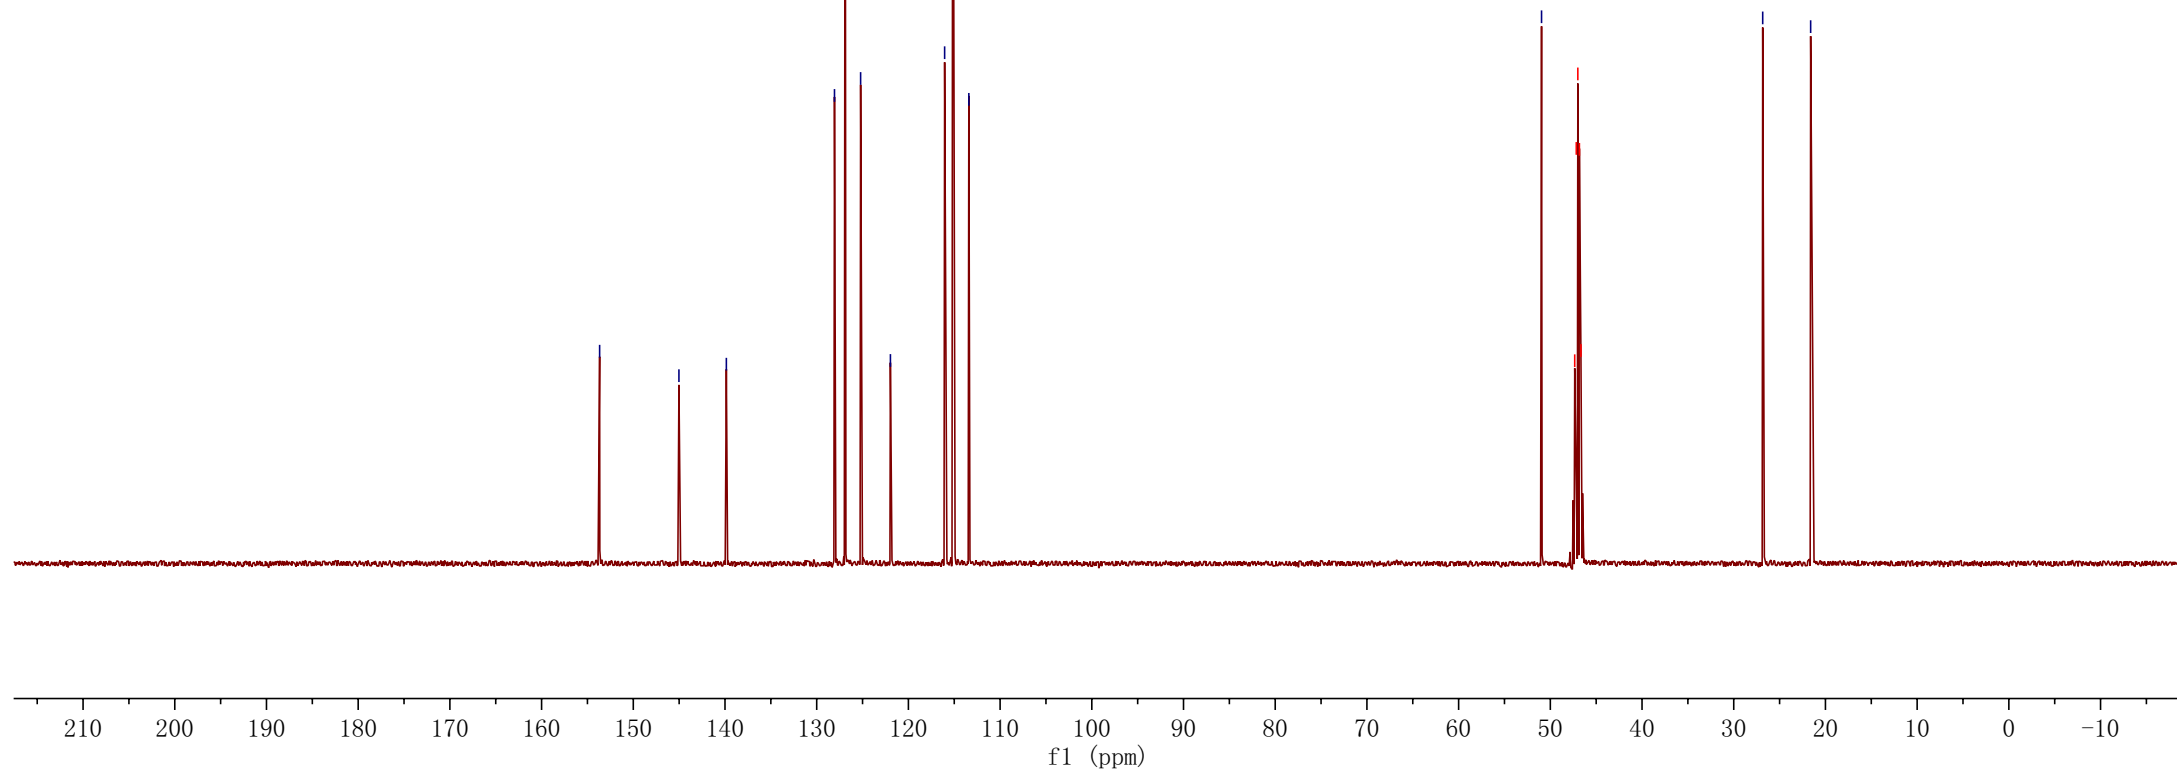

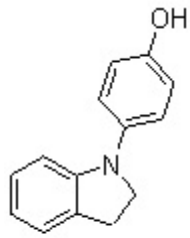

1e  
500 MHz CD<sub>3</sub>OD

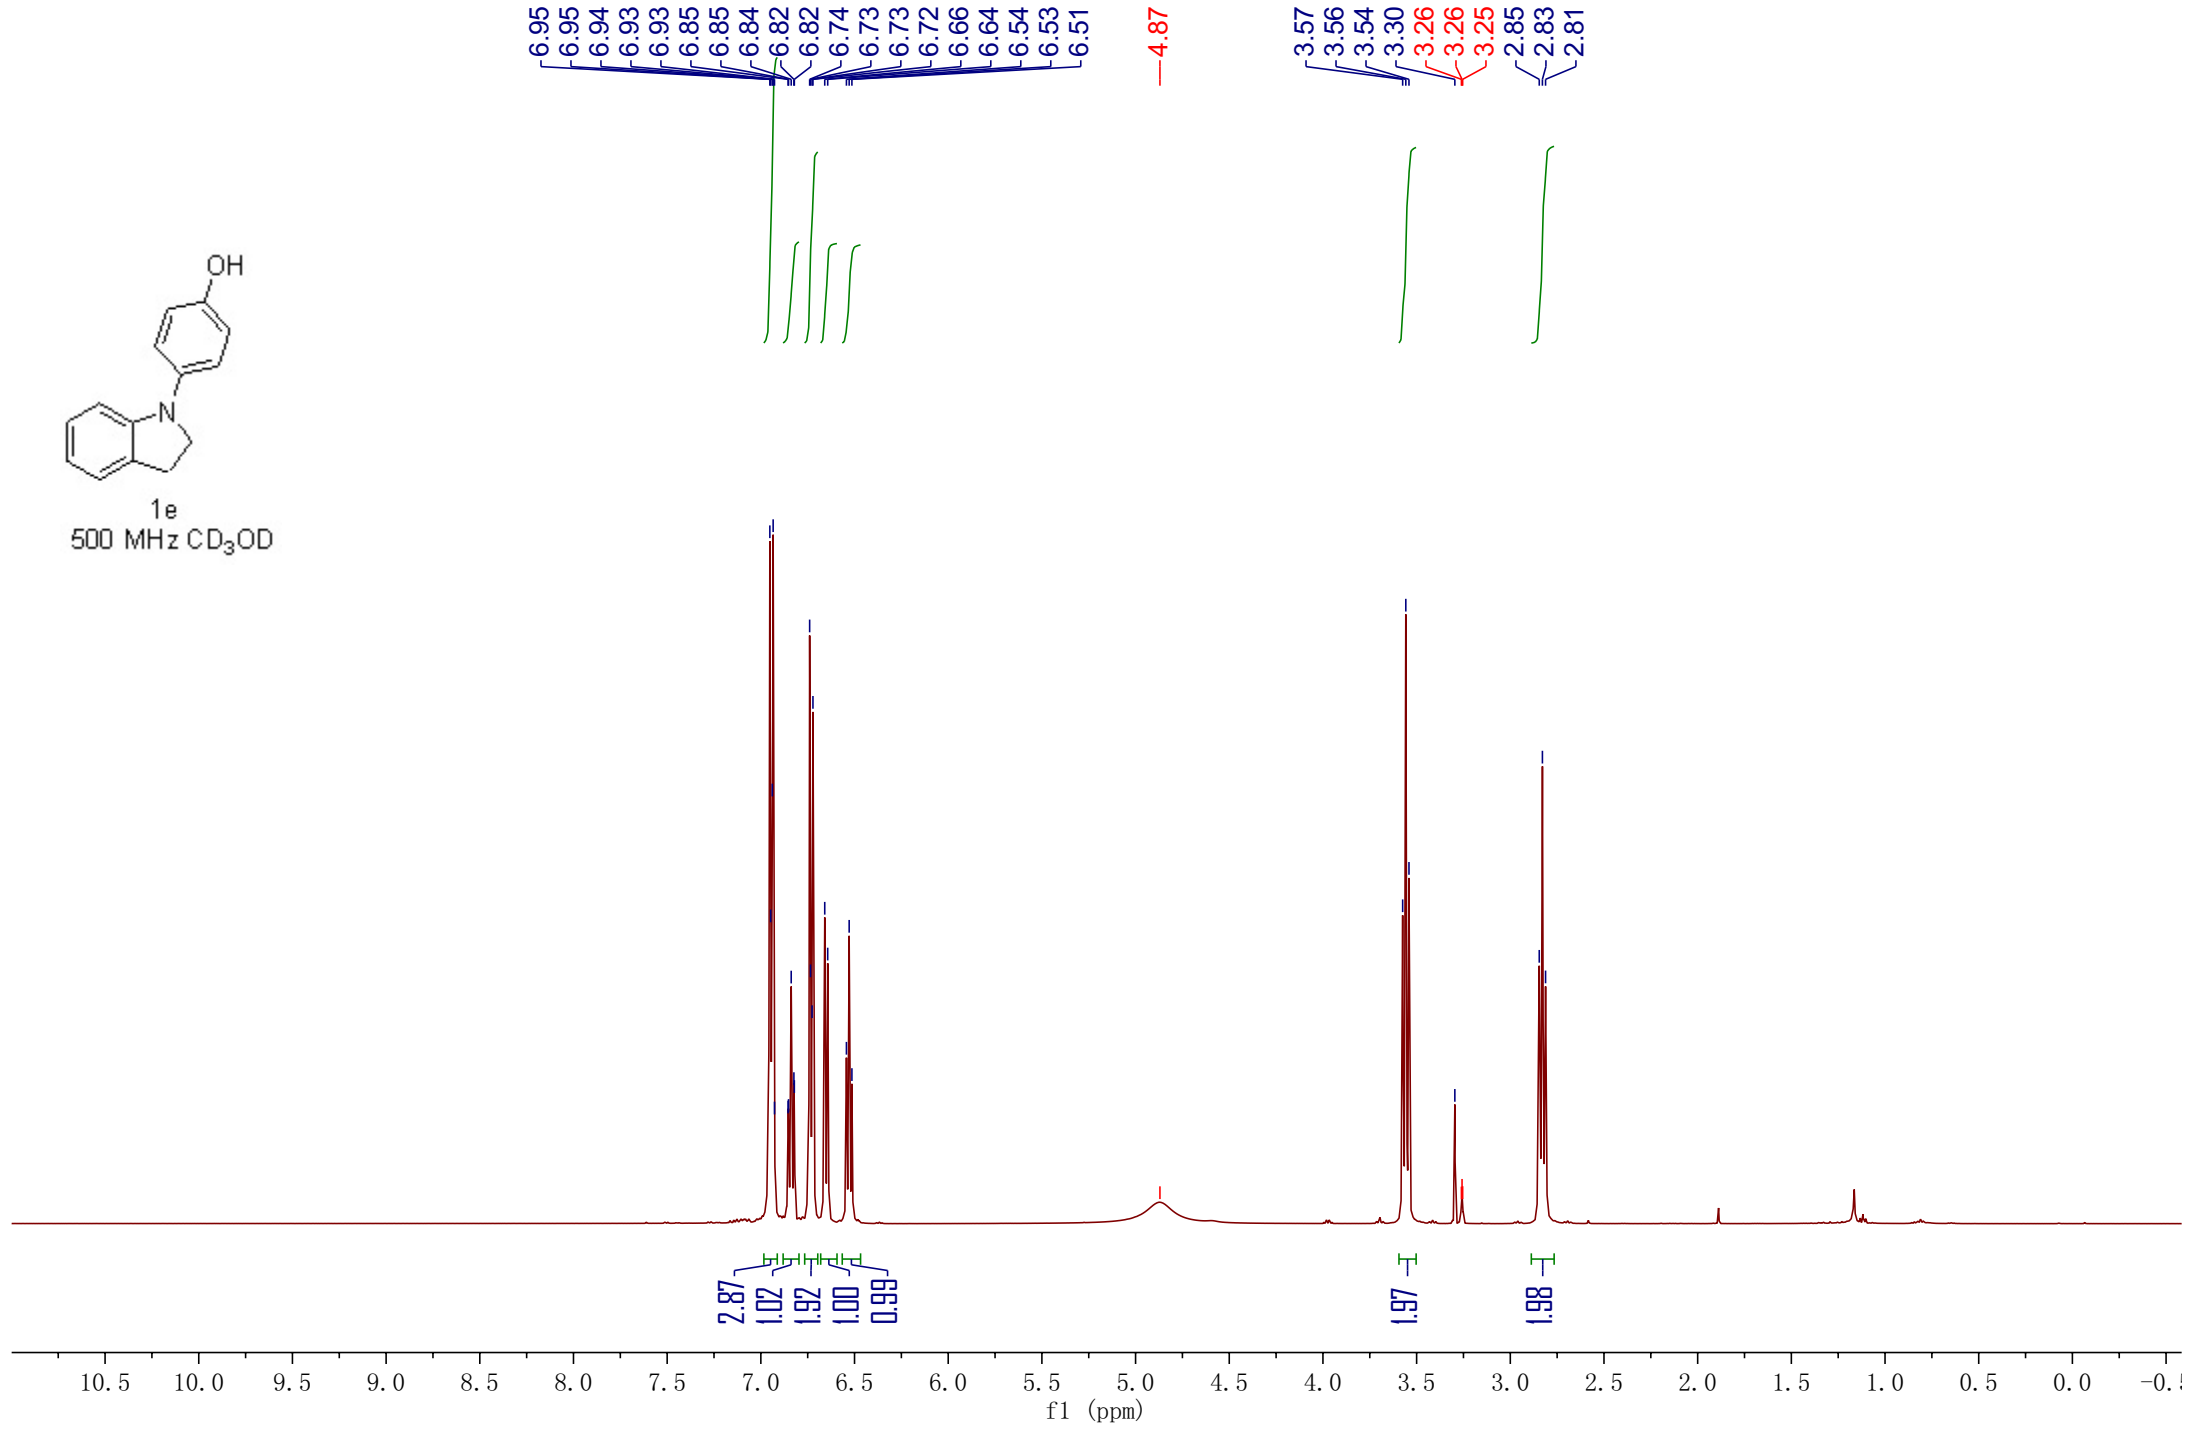

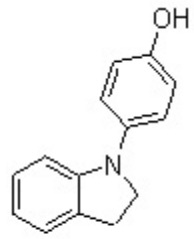

1e  
500 MHz CD<sub>3</sub>OD

- 151.44
- 148.08
- 136.39
- ~ 129.67
- ~ 125.84
- ~ 123.60
- 120.26
- 116.97
- ~ 114.71
- 106.23
- 52.31
- 47.51 MeOD
- 47.34 MeOD
- 47.17 MeOD
- 47.00 MeOD
- 46.83 MeOD
- 46.66 MeOD
- 46.49 MeOD
- 27.01

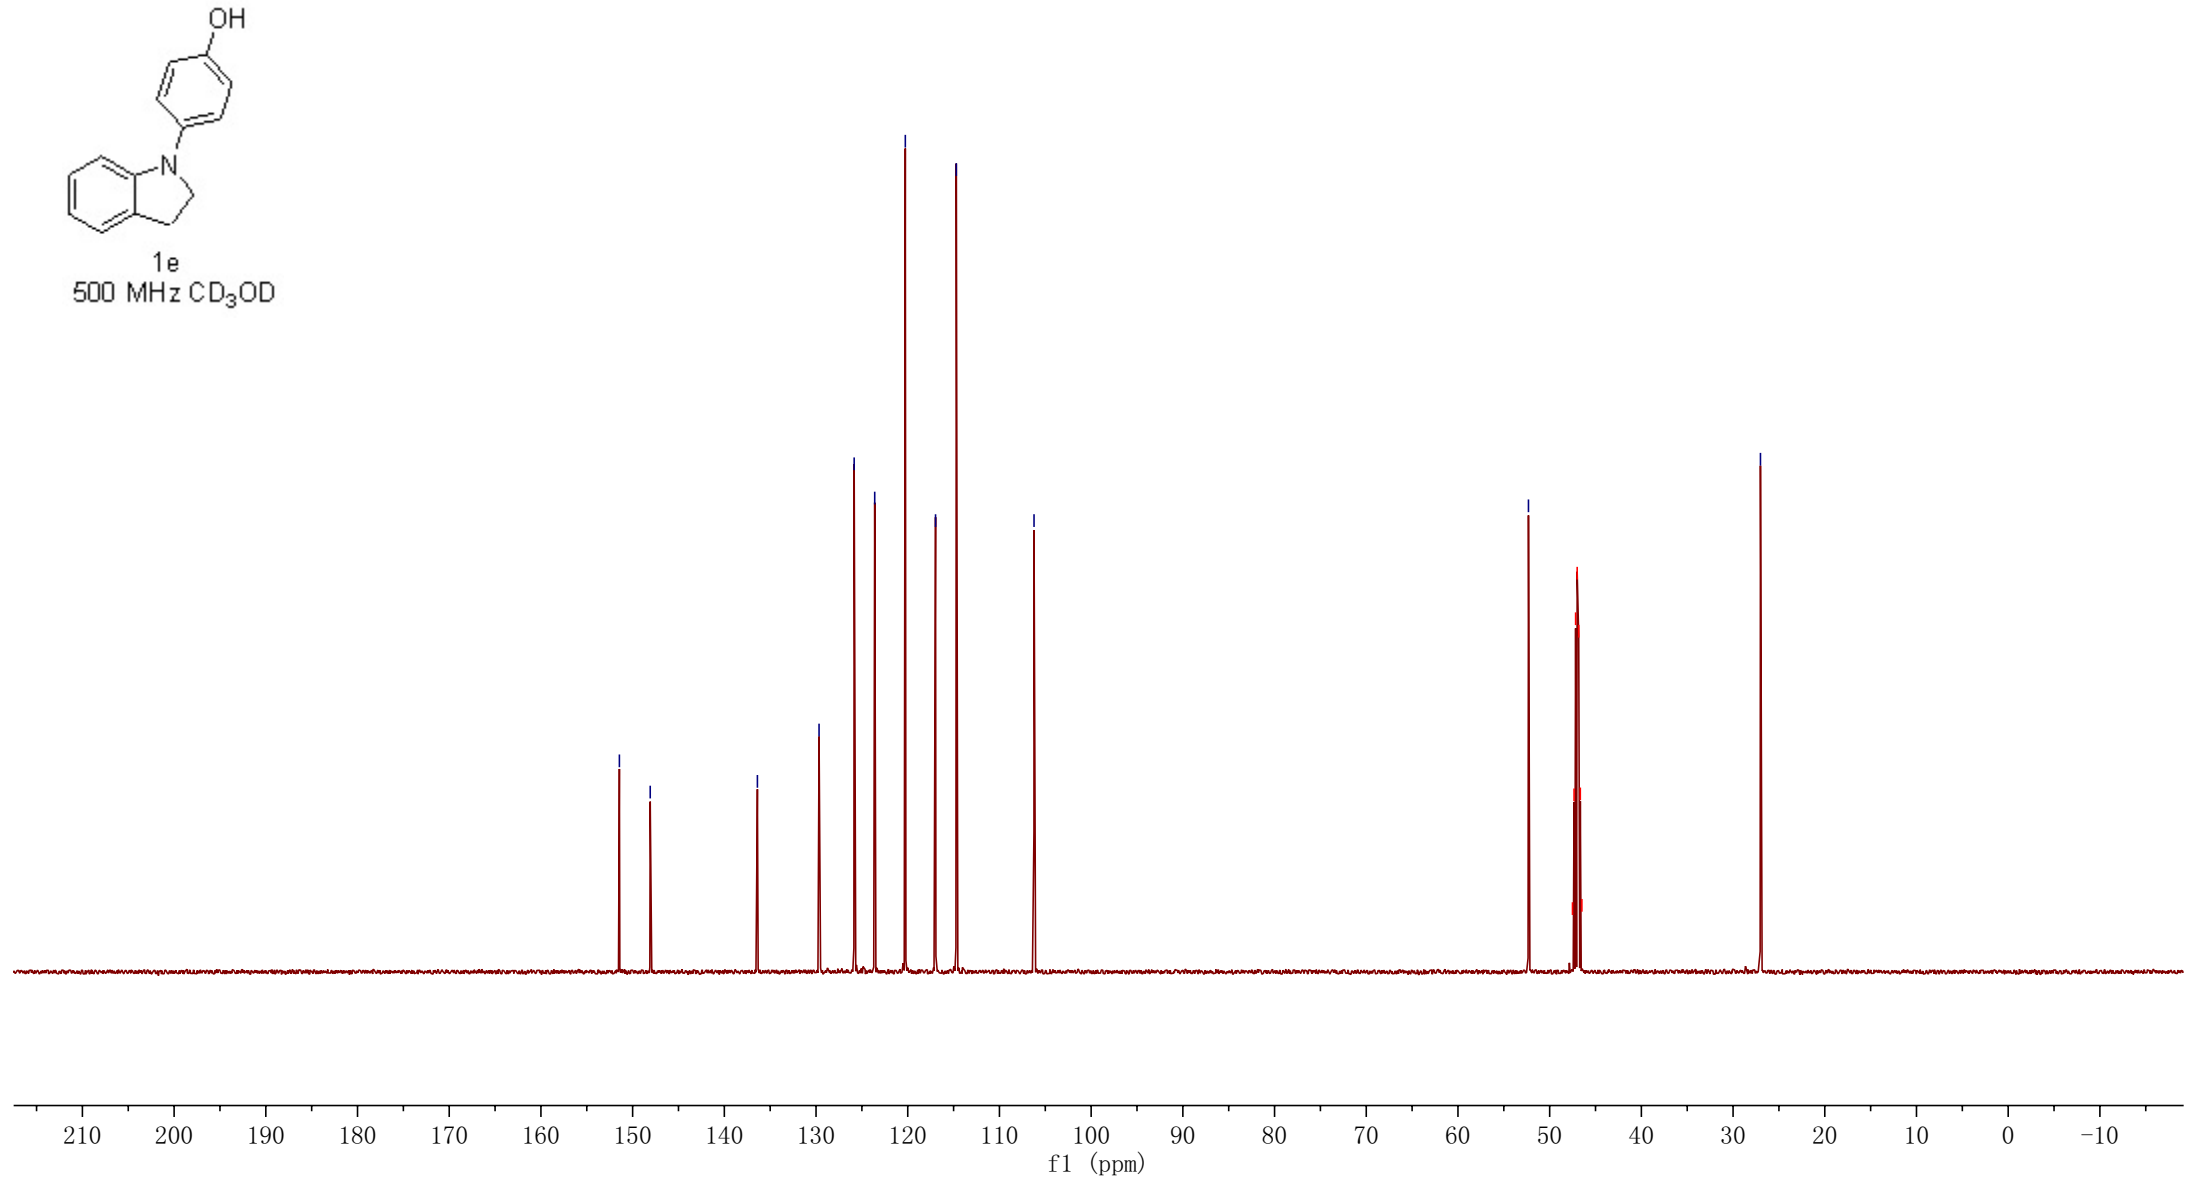

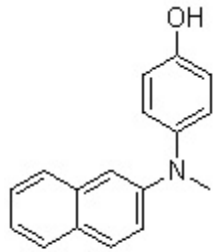

1f

500 MHz CD<sub>3</sub>OD

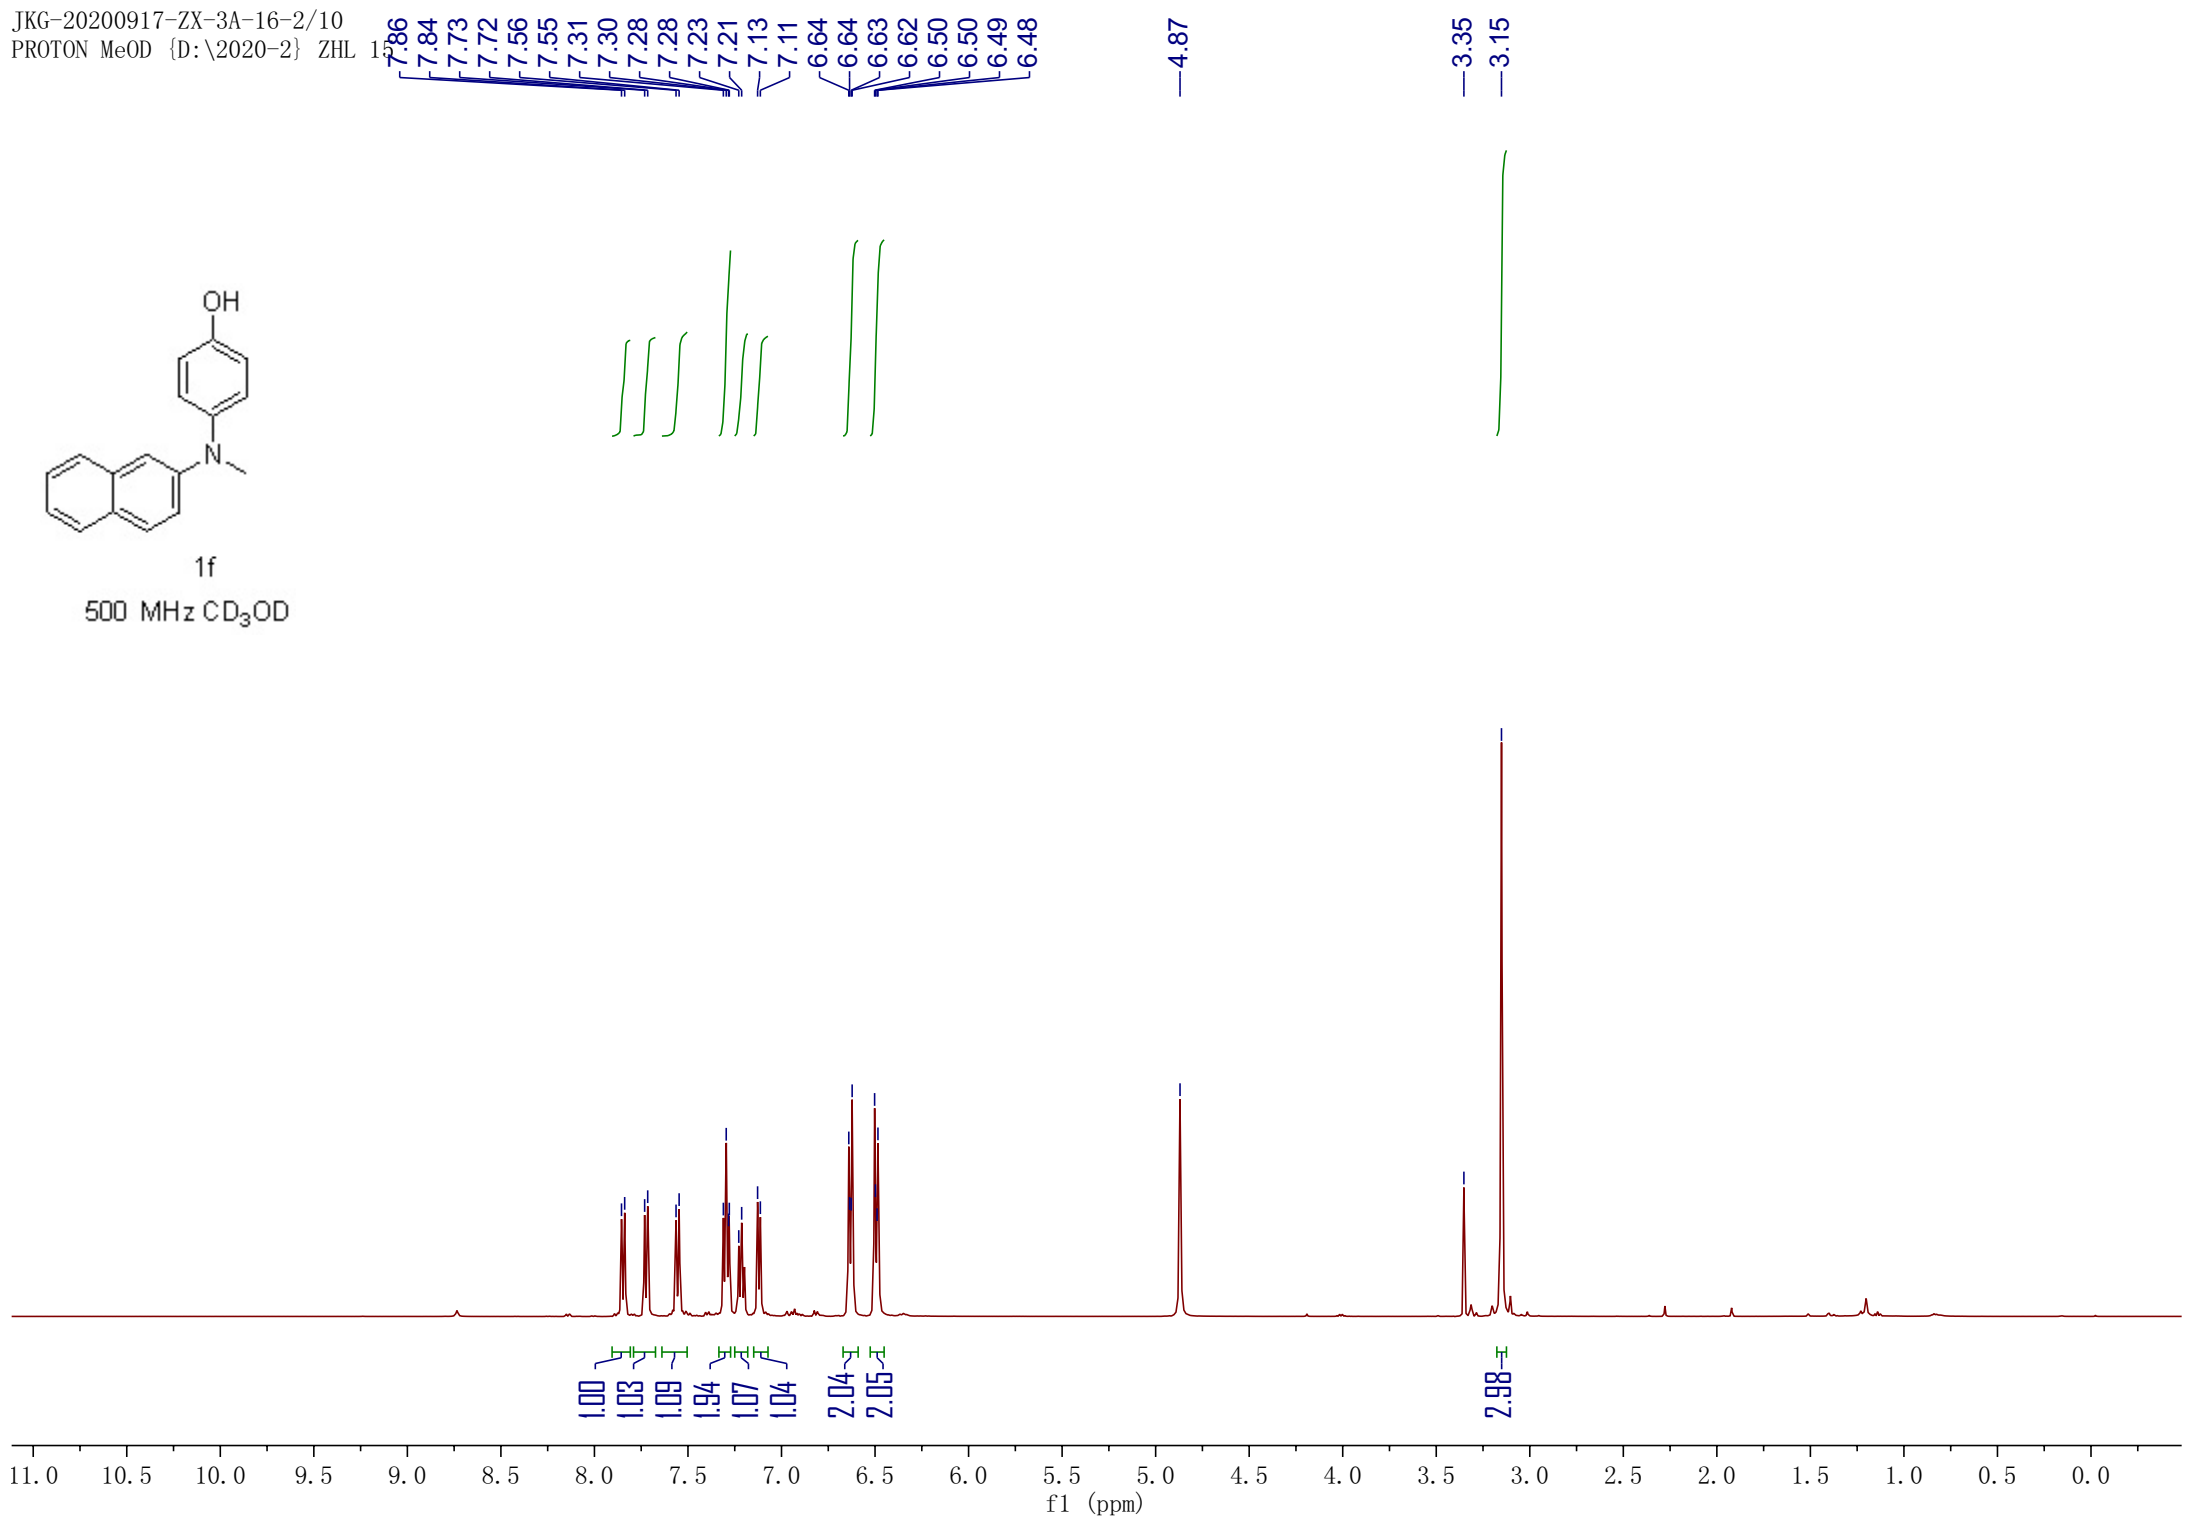

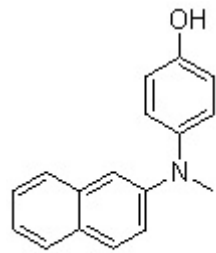

1f

500 MHz CD<sub>3</sub>OD

148.62  
145.92  
143.66  
134.32  
129.92  
127.25  
125.19  
124.83  
124.63  
124.25  
123.01  
121.82  
116.05  
114.57

47.51 MeOD  
47.34 MeOD  
47.17 MeOD  
47.00 MeOD  
46.83 MeOD  
46.66 MeOD  
46.49 MeOD  
39.75

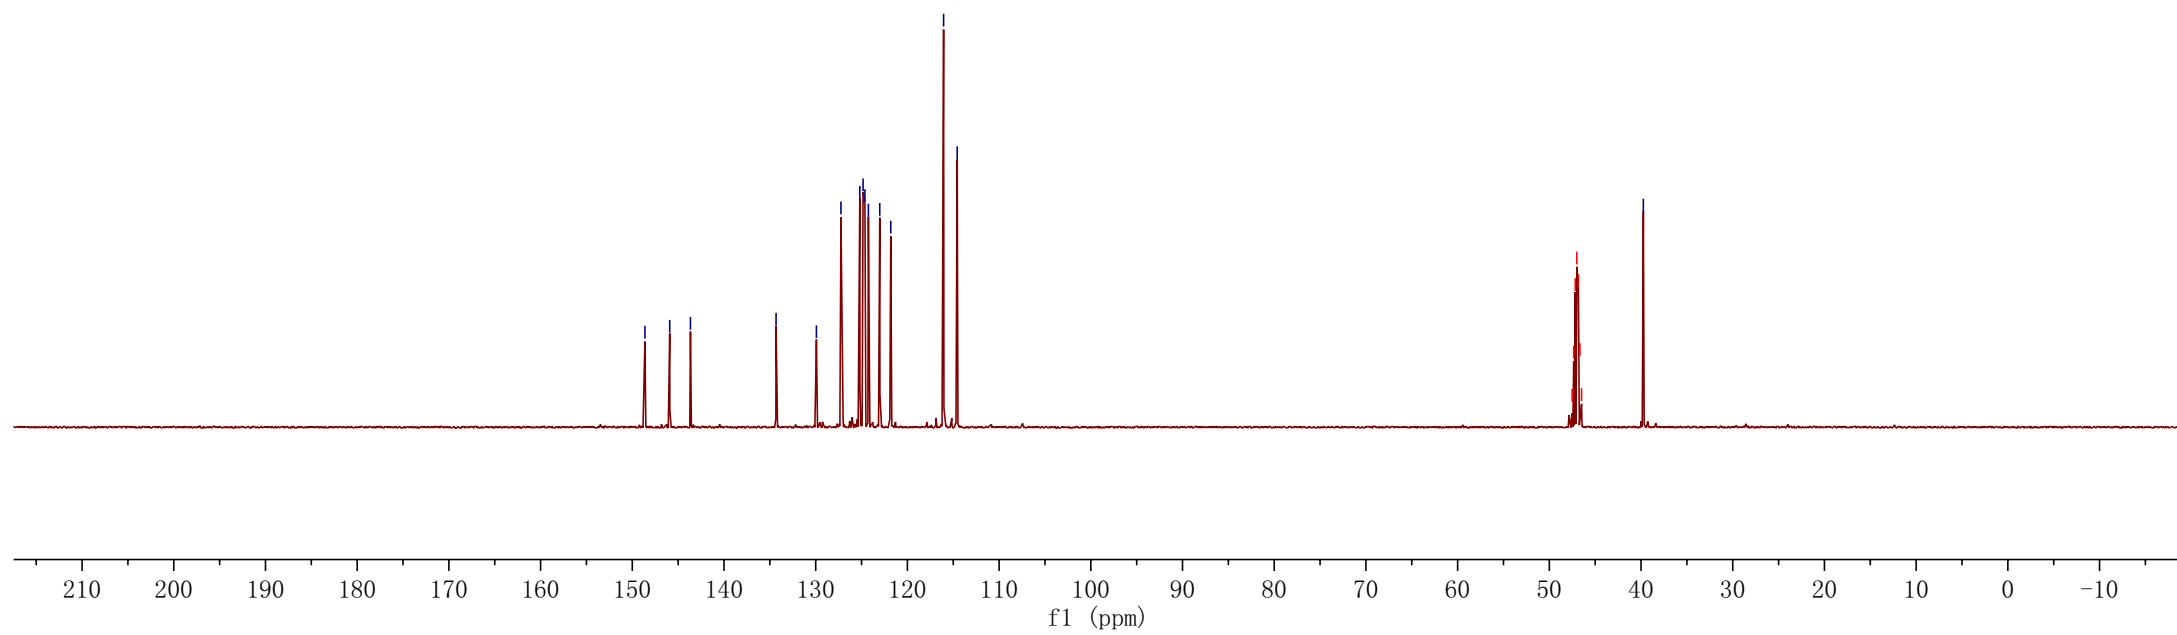

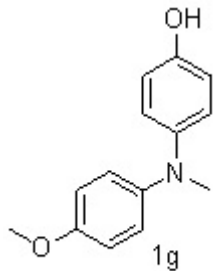

500 MHz CD<sub>3</sub>OD

6.82  
6.81  
6.79  
6.78  
6.76  
6.76  
6.73  
6.72  
6.71  
6.70  
6.70  
6.69

4.87 HDO

3.71  
3.31 MeOD  
3.31 MeOD  
3.31 MeOD  
3.30 MeOD  
3.12

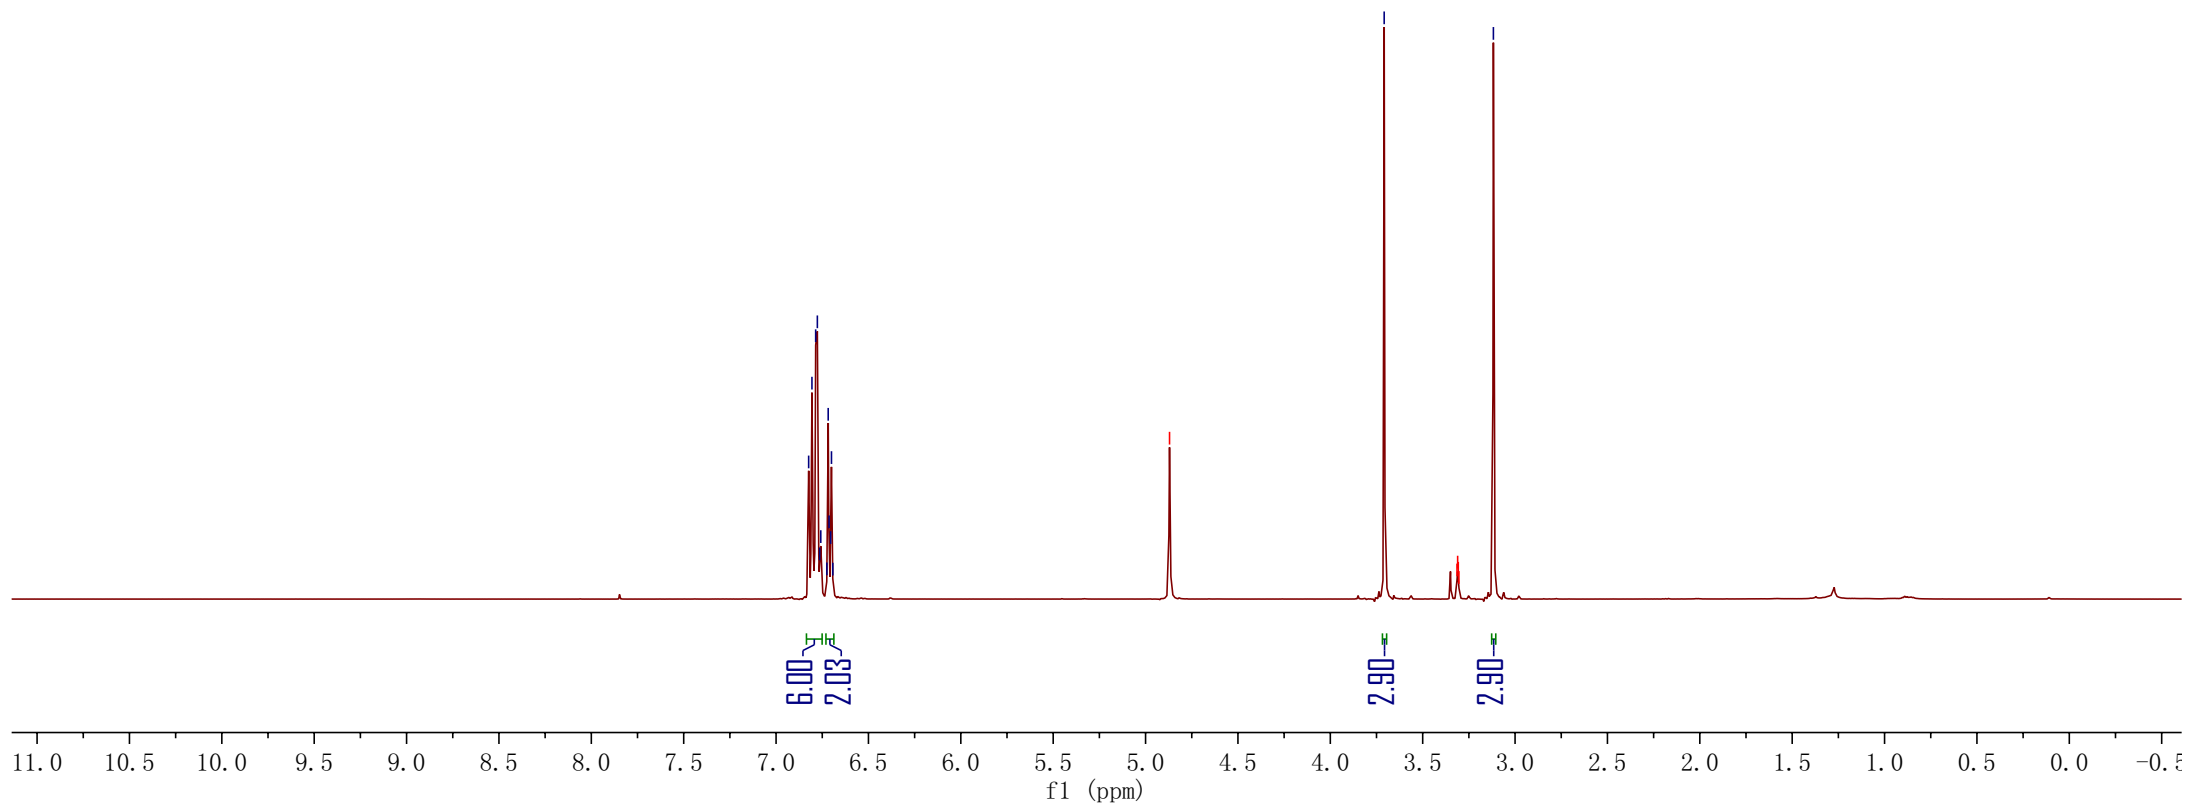

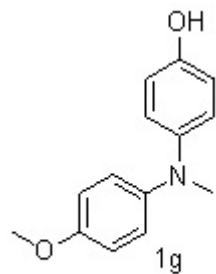

500 MHz C D<sub>3</sub>OD

~155.27  
~153.59

~145.59  
~144.17

~124.15  
~121.30  
~116.81  
~115.44

55.98  
49.51 MeOD  
49.34 MeOD  
49.17 MeOD  
49.00 MeOD  
48.83 MeOD  
48.66 MeOD  
48.49 MeOD  
41.59

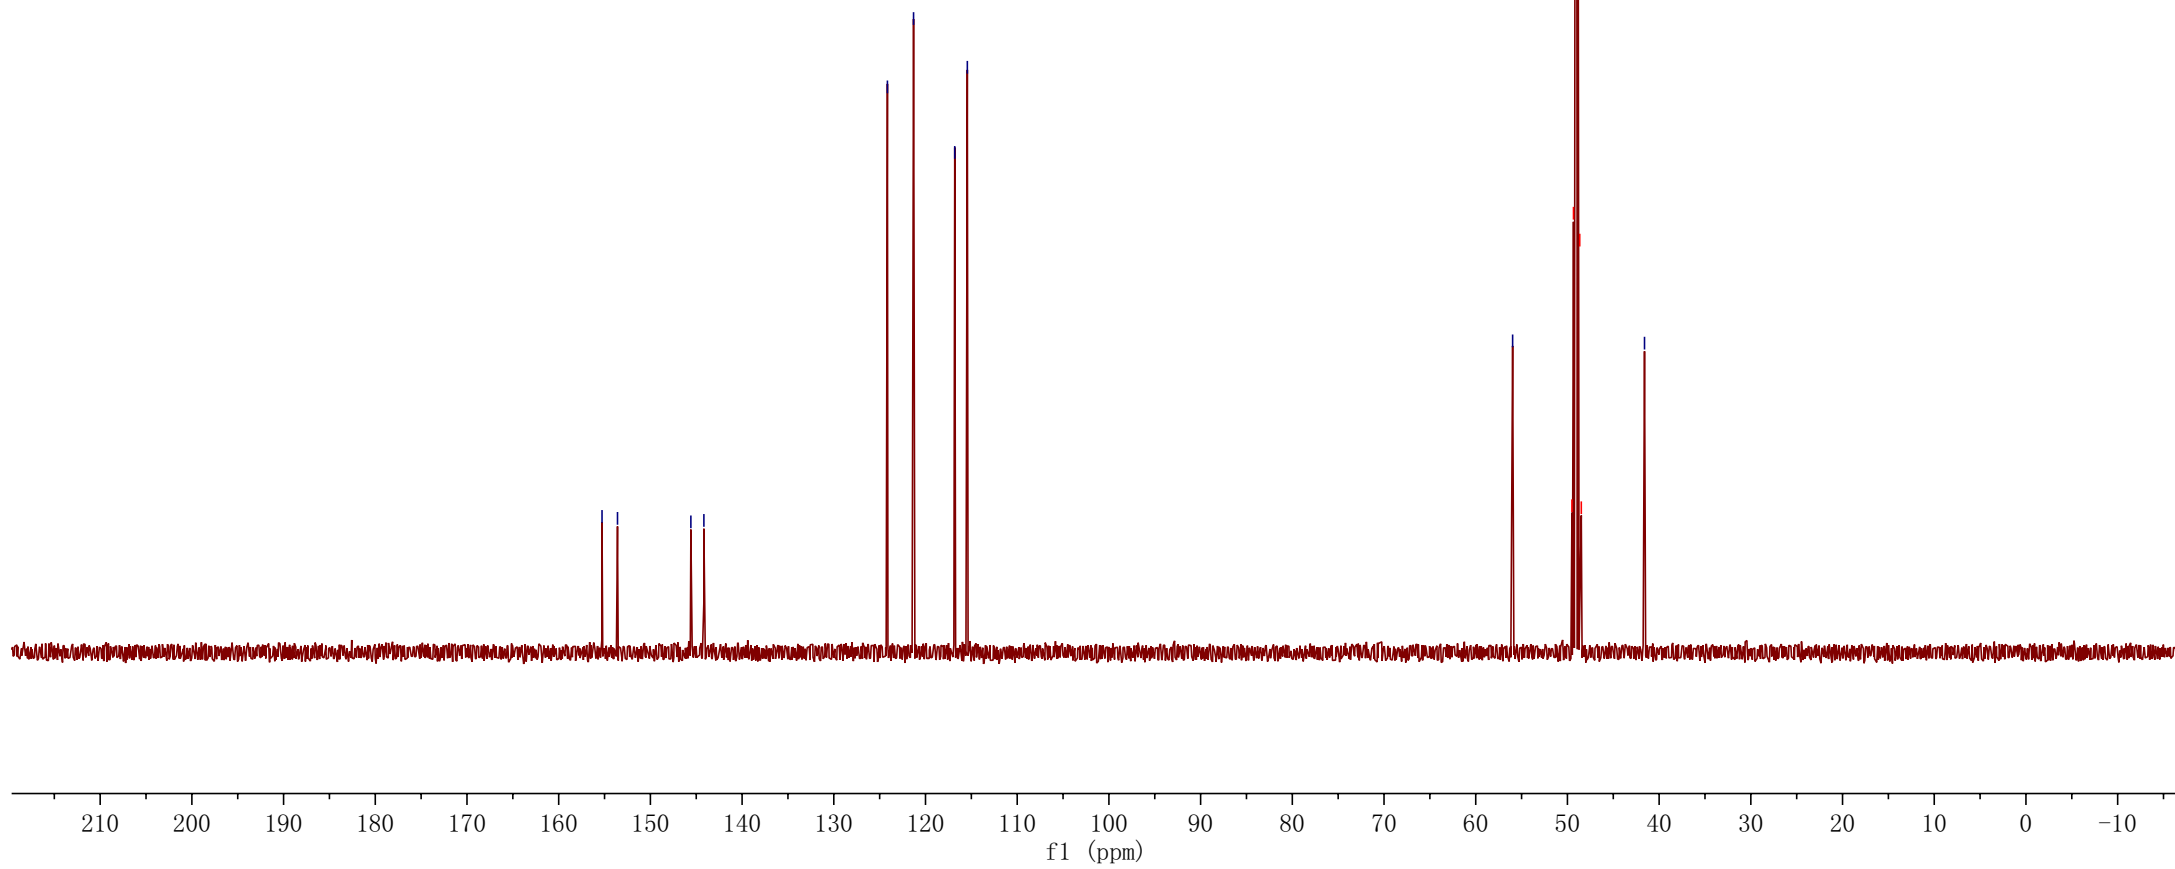



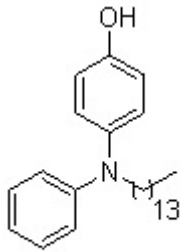

1h

500 MHz CD<sub>3</sub>OD

7.11  
7.09  
7.08  
6.97  
6.96  
6.82  
6.81  
6.81  
6.67  
6.66  
6.65

—4.87 HDO

3.60  
3.58  
3.57  
3.38 MeOH  
3.35 MeOH

1.64  
1.63  
1.61  
1.30  
1.30  
1.29  
0.93  
0.92  
0.91

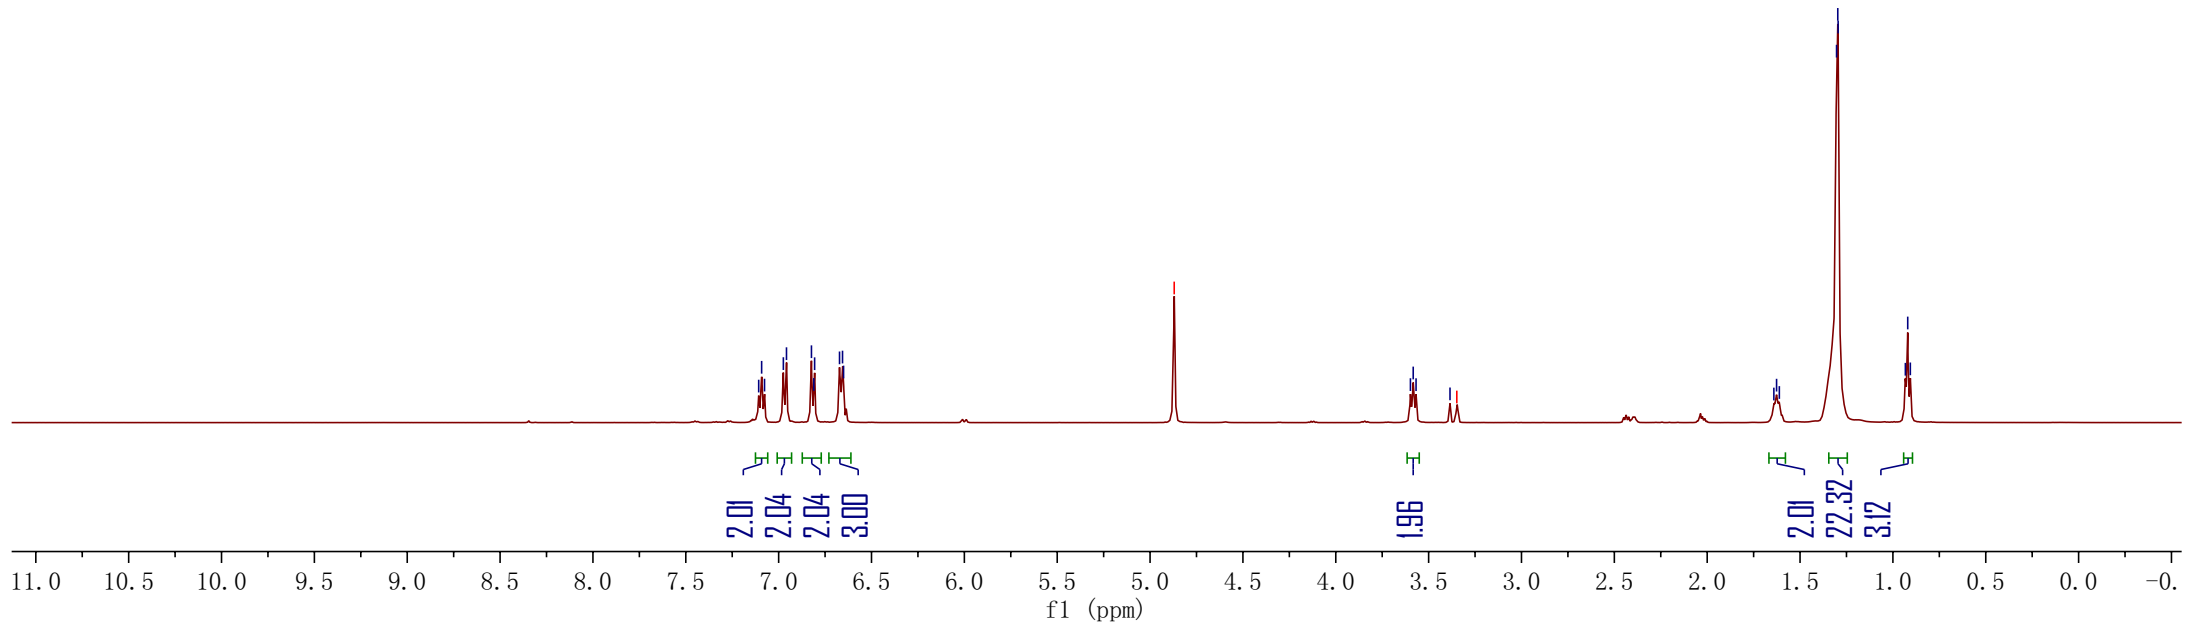

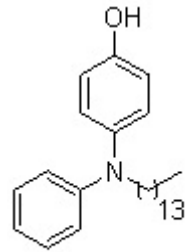

1h

500 MHz CD<sub>3</sub>OD

— 155.56  
— 150.72  
— 141.07  
{ 129.74  
{ 129.02  
{ 118.35  
{ 117.20  
{ 116.16  
53.39 MeOD  
49.51 MeOD  
49.34 MeOD  
49.17 MeOD  
49.00 MeOD  
48.83 MeOD  
48.66 MeOD  
48.49 MeOD  
33.07  
30.80  
30.77  
30.75  
30.72  
30.69  
30.56  
30.48  
28.56  
28.12  
23.78  
23.74  
14.50

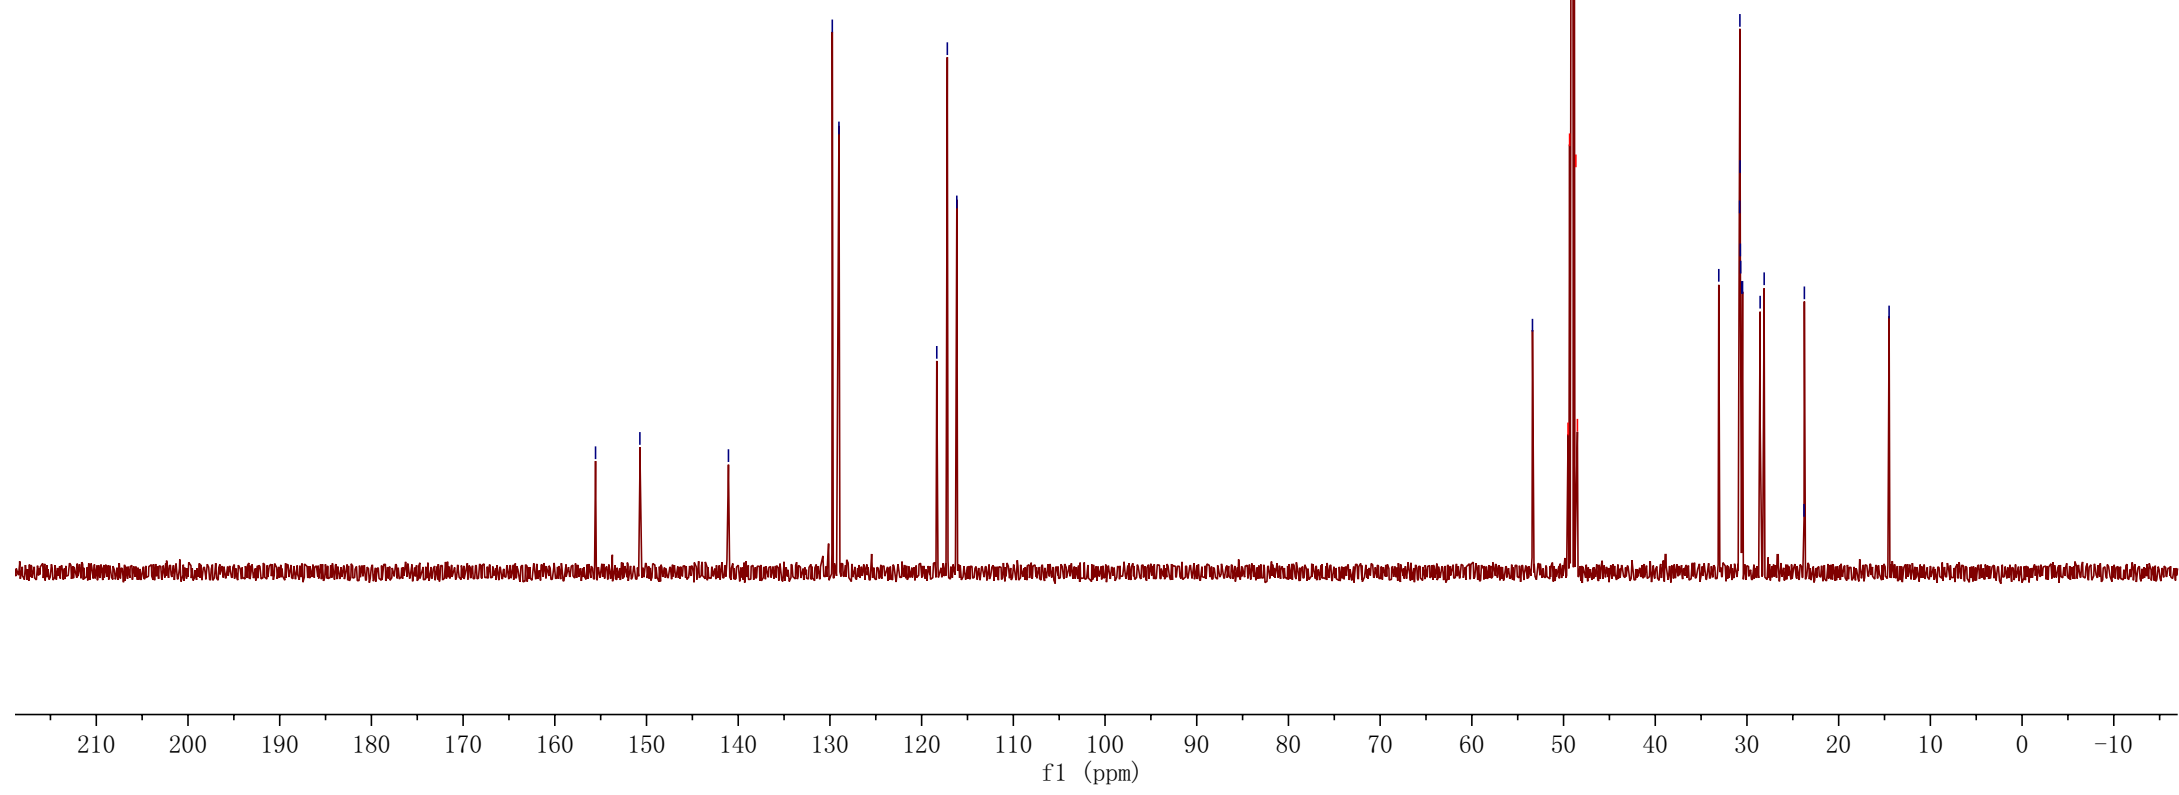

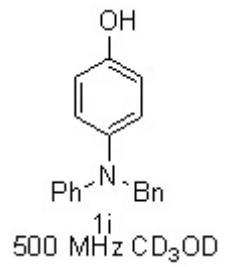

7.32 7.32 7.31 7.27 7.25 7.23 7.18 7.17 7.15 7.06 7.06 7.05 7.05 7.04 7.03 7.03 7.03 7.02 6.78 6.76 6.71 6.71 6.69 6.66 6.65 6.64 4.87 HDO 4.84 3.36 3.33 MeOD 3.32 MeOD 3.32 MeOD 3.32 MeOD 3.31 MeOD

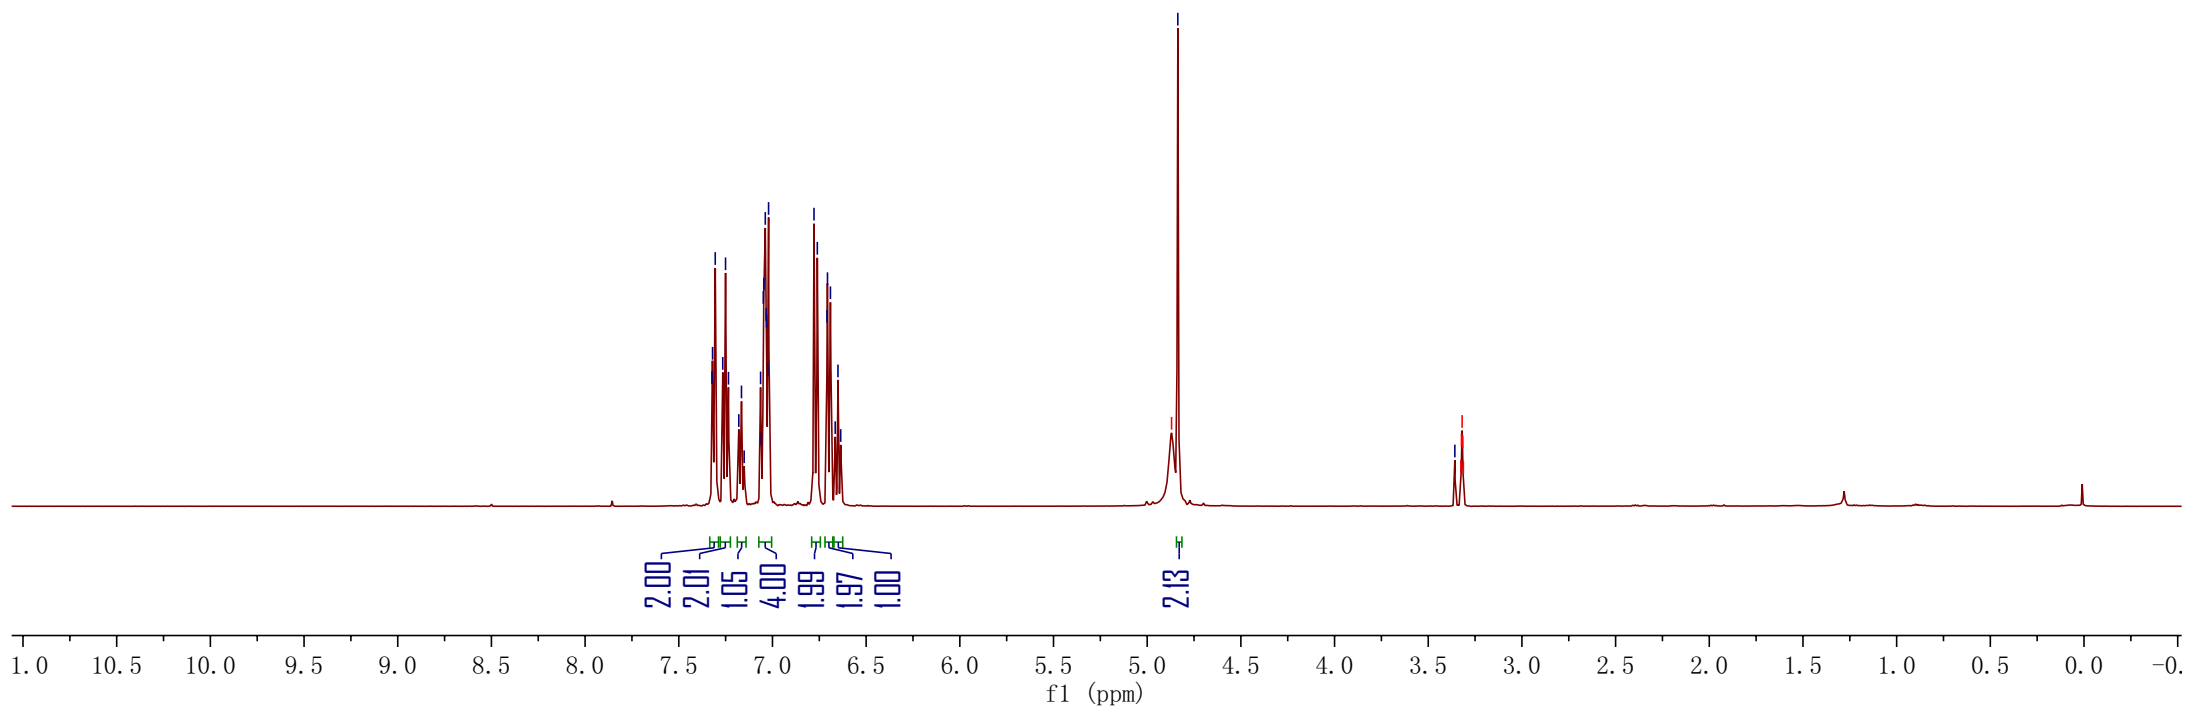

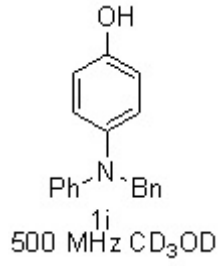

— 155.45  
— 150.52  
— 141.46  
— 140.88  
— 129.72  
— 129.37  
— 128.32  
— 127.83  
— 127.65  
— 118.91  
— 117.17  
— 116.56

— 57.60  
— 49.51 MeOD  
— 49.34 MeOD  
— 49.17 MeOD  
— 49.00 MeOD  
— 48.83 MeOD  
— 48.66 MeOD  
— 48.49 MeOD

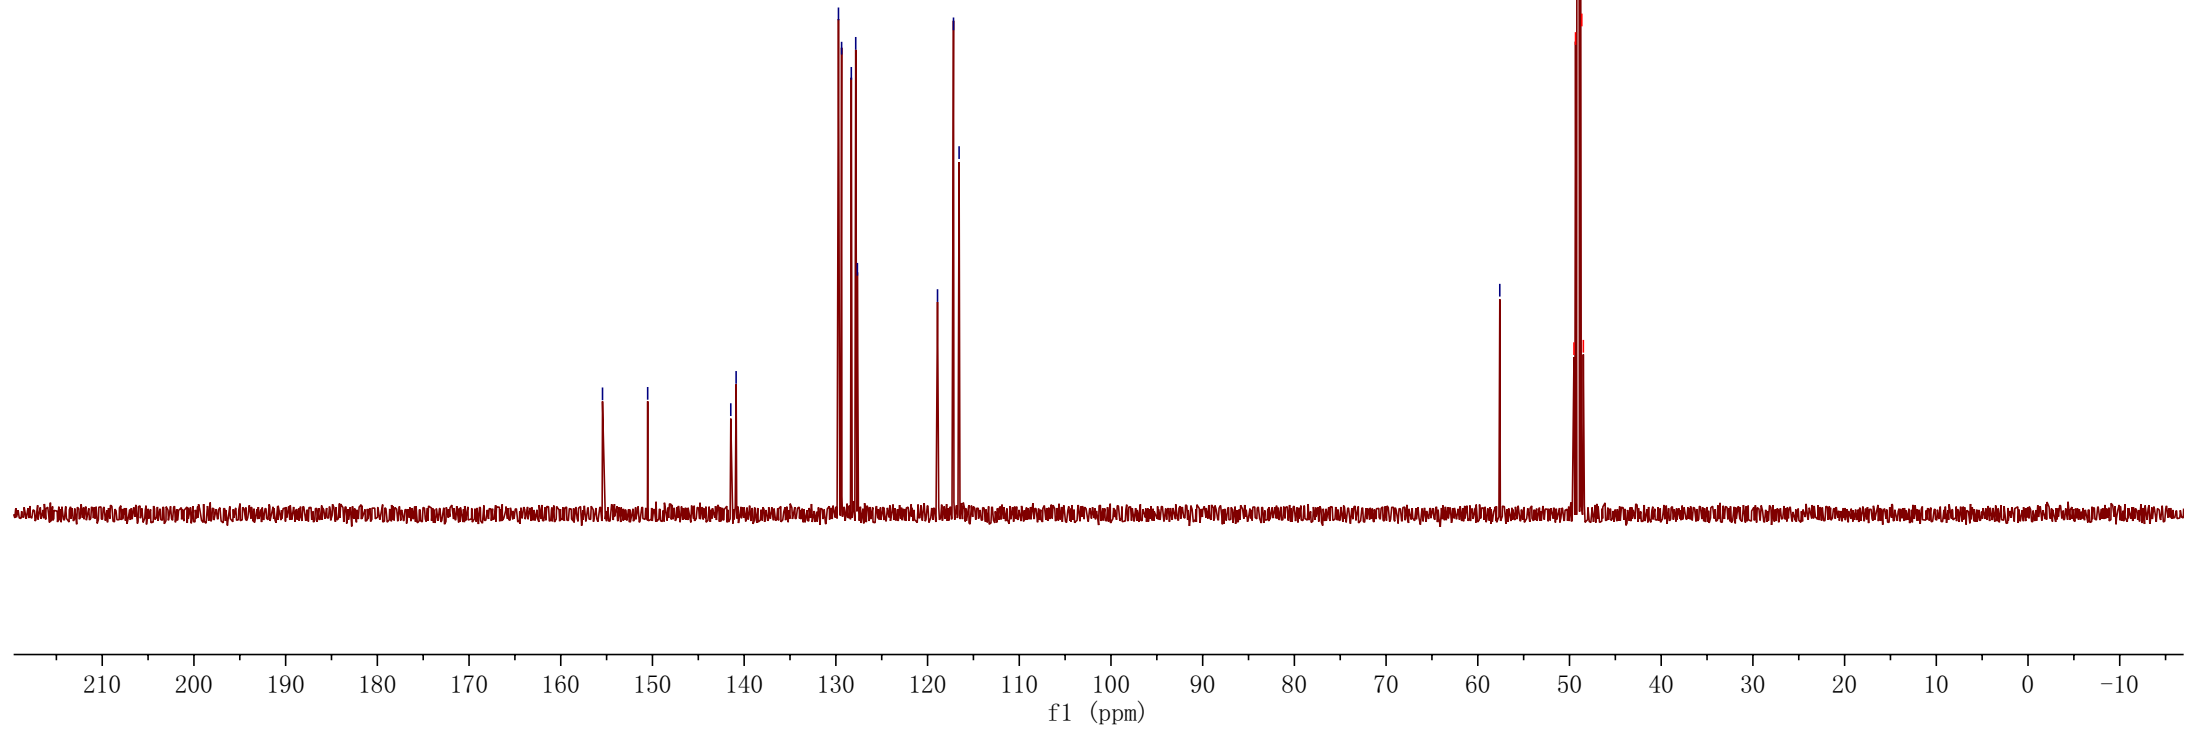

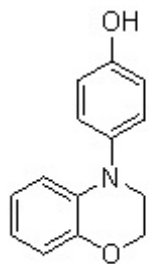

1j  
500 MHz CD<sub>3</sub>OD

7.02  
7.00  
6.81  
6.79  
6.74  
6.74  
6.73  
6.73  
6.73  
6.72  
6.59  
6.58  
6.58  
6.57  
6.57  
6.57  
6.56  
6.51  
6.51  
6.50  
6.50  
6.49  
— 4.87 HDO  
4.20  
4.19  
4.18  
3.52  
3.51  
3.50  
3.35 MeOH  
3.32 MeOD  
3.32 MeOD  
3.32 MeOD  
3.31 MeOD  
3.31 MeOD

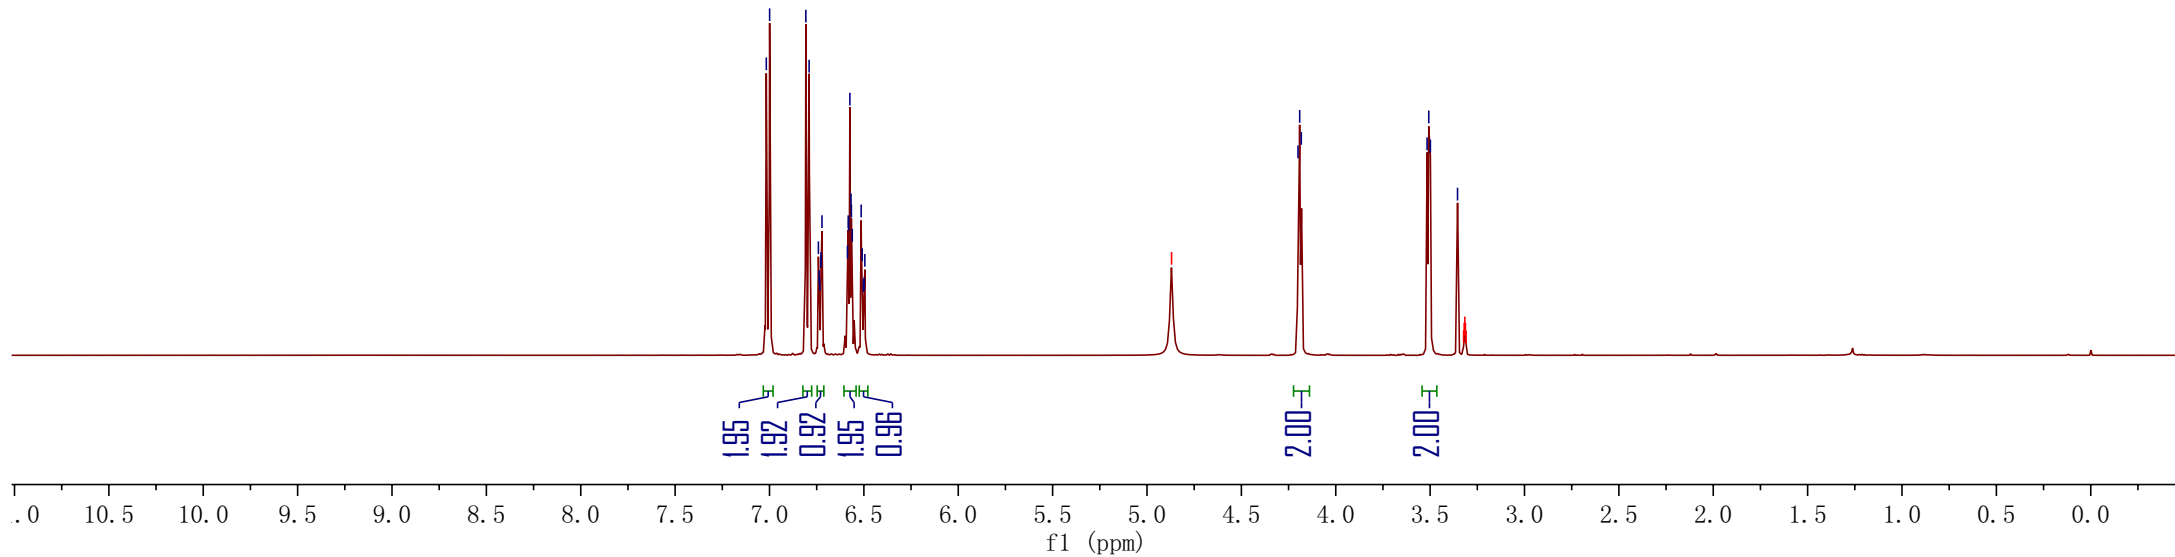

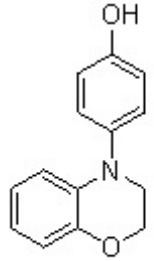

1j  
500 MHz CD<sub>3</sub>OD

— 155.71

— 145.70

— 140.51

— 135.85

— 127.77

— 121.84

— 119.77

— 117.51

— 117.14

— 116.55

— 65.54

— 50.64

— 49.51 MeOD

— 49.34 MeOD

— 49.17 MeOD

— 49.00 MeOD

— 48.83 MeOD

— 48.66 MeOD

— 48.49 MeOD

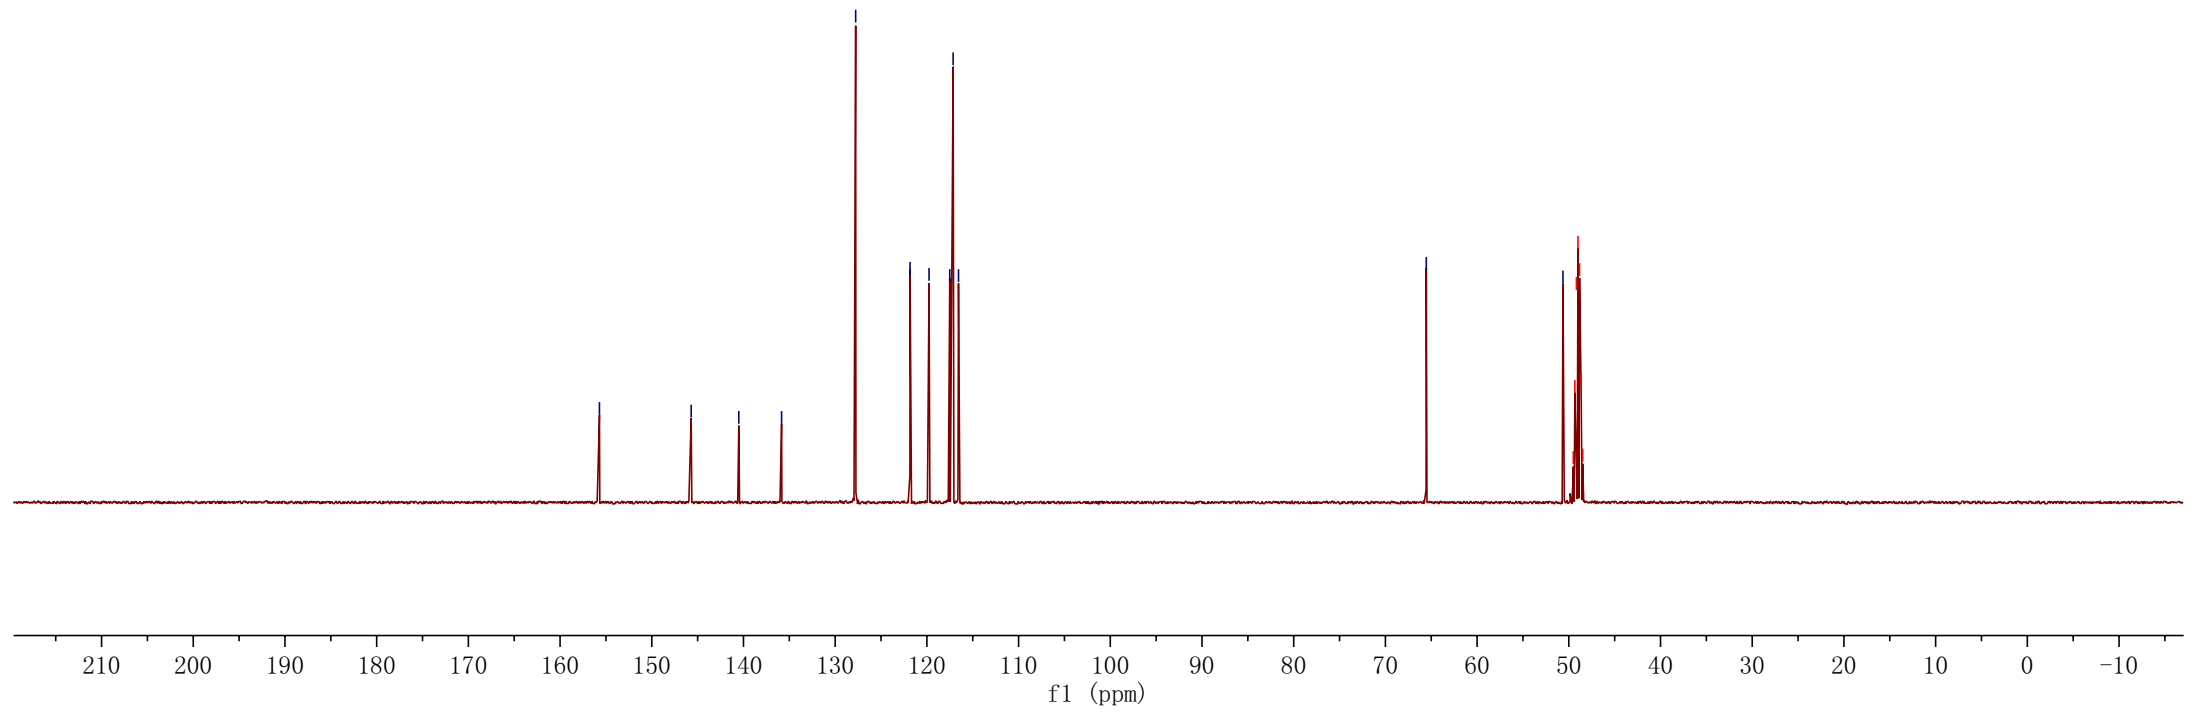

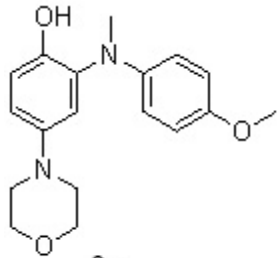

**3a**

500 MHz, CDCl<sub>3</sub>

7.26 CDCl<sub>3</sub>

6.97  
6.96  
6.80  
6.79  
6.78  
6.77  
6.70  
6.68  
6.65  
6.64  
5.87

3.82  
3.81  
3.80  
3.75  
3.14  
3.00  
2.99  
2.98

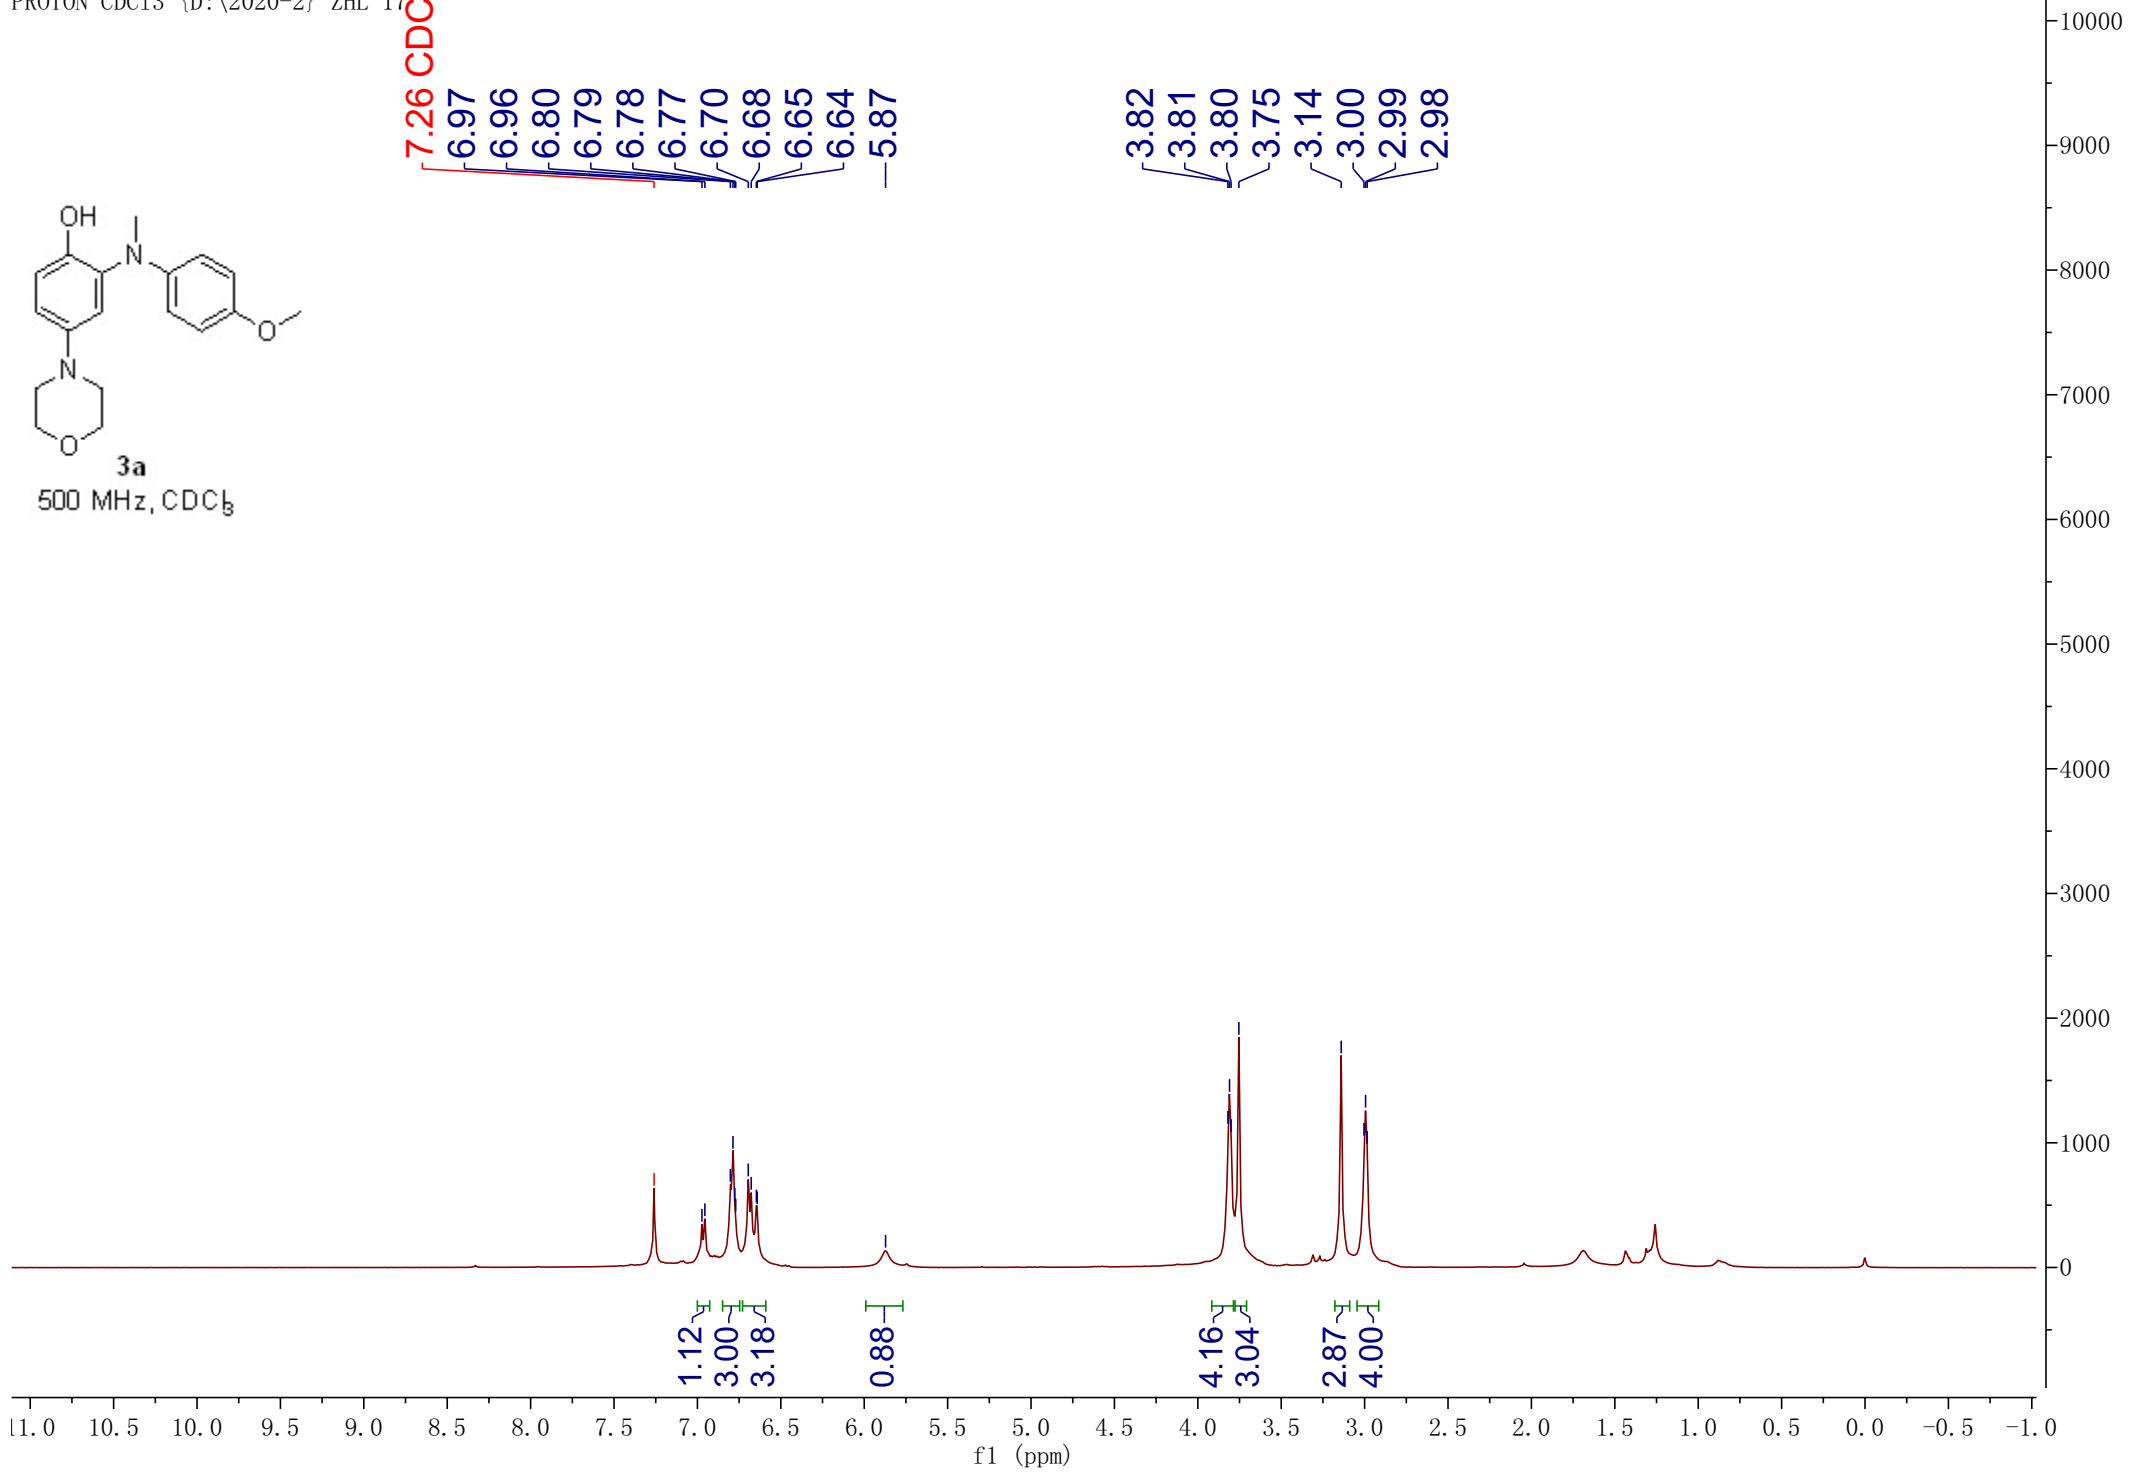

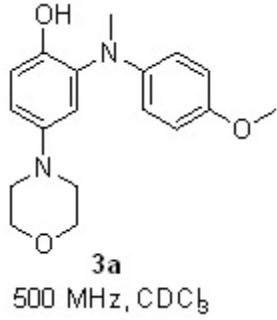

153.32  
146.86  
146.11  
143.47

116.55  
116.02  
115.49  
114.76  
114.60

77.32 CDC13  
77.07 CDC13  
76.81 CDC13  
66.99

55.69  
50.76

40.44

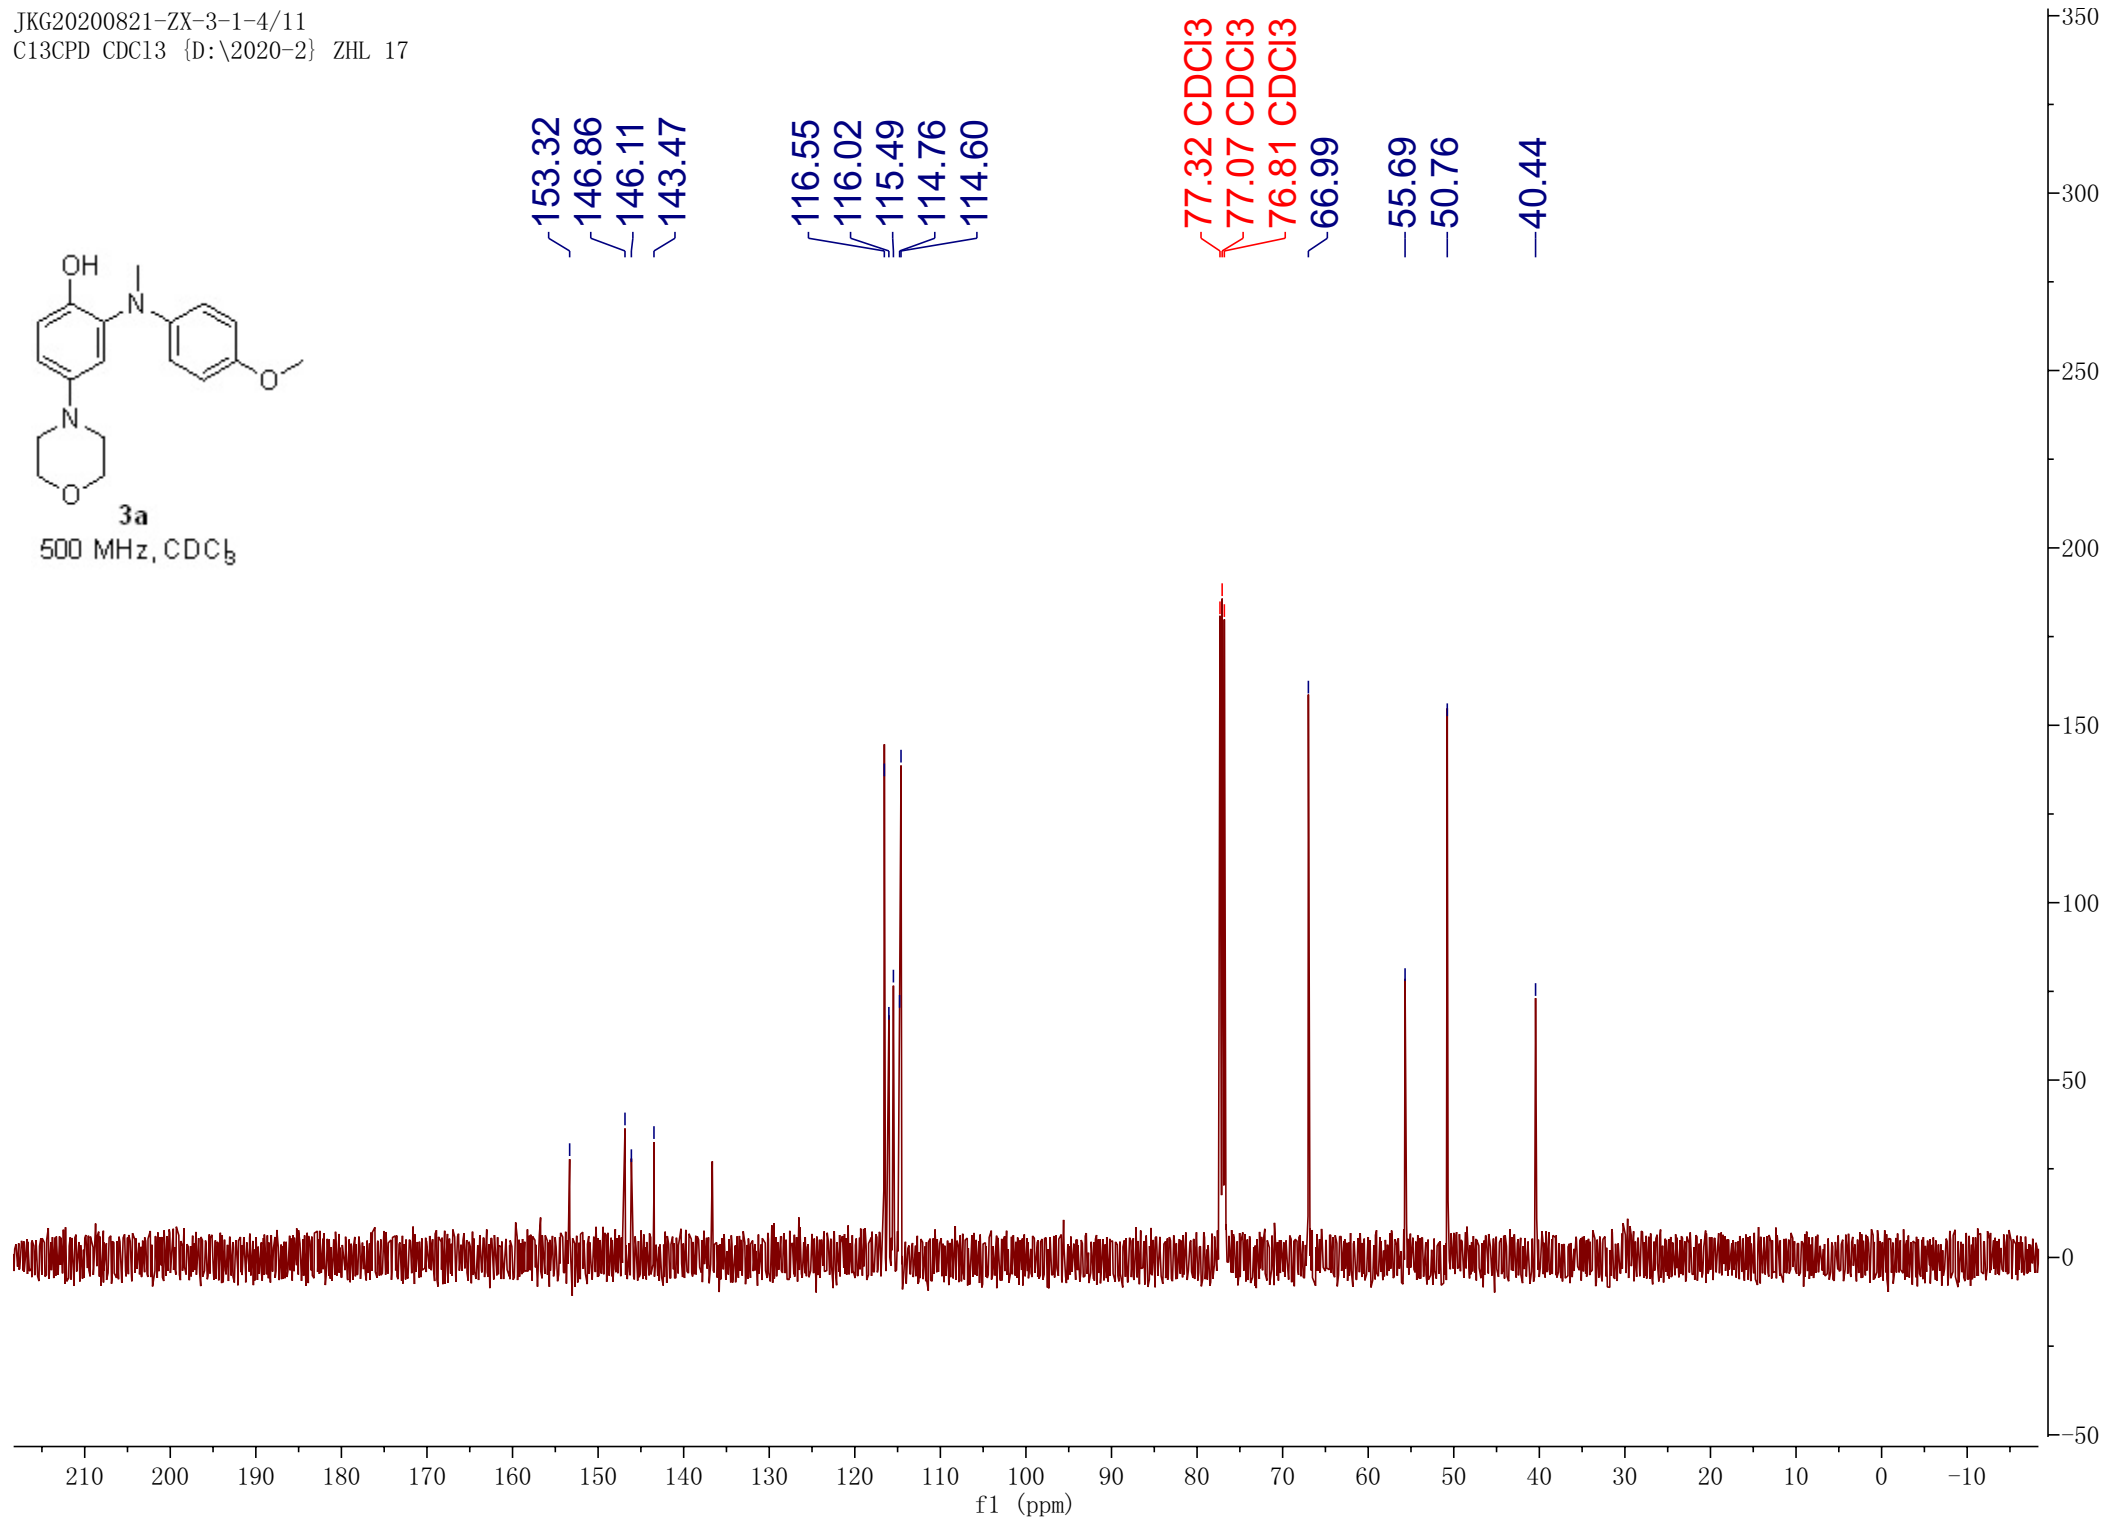



7.26 CDCl<sub>3</sub>

6.95  
6.93  
6.83  
6.83  
6.82  
6.81  
6.80  
6.80  
6.79  
6.79  
6.70  
6.69  
6.69  
6.68  
-5.81

-3.76  
3.14  
2.98  
2.97  
2.95  
1.71  
1.70  
1.69  
1.68  
1.66  
1.53  
1.53  
1.51  
1.50

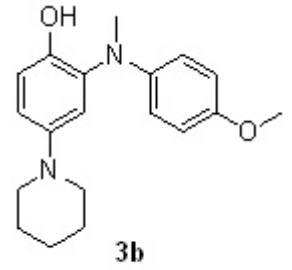

500 MHz, CDCl<sub>3</sub>

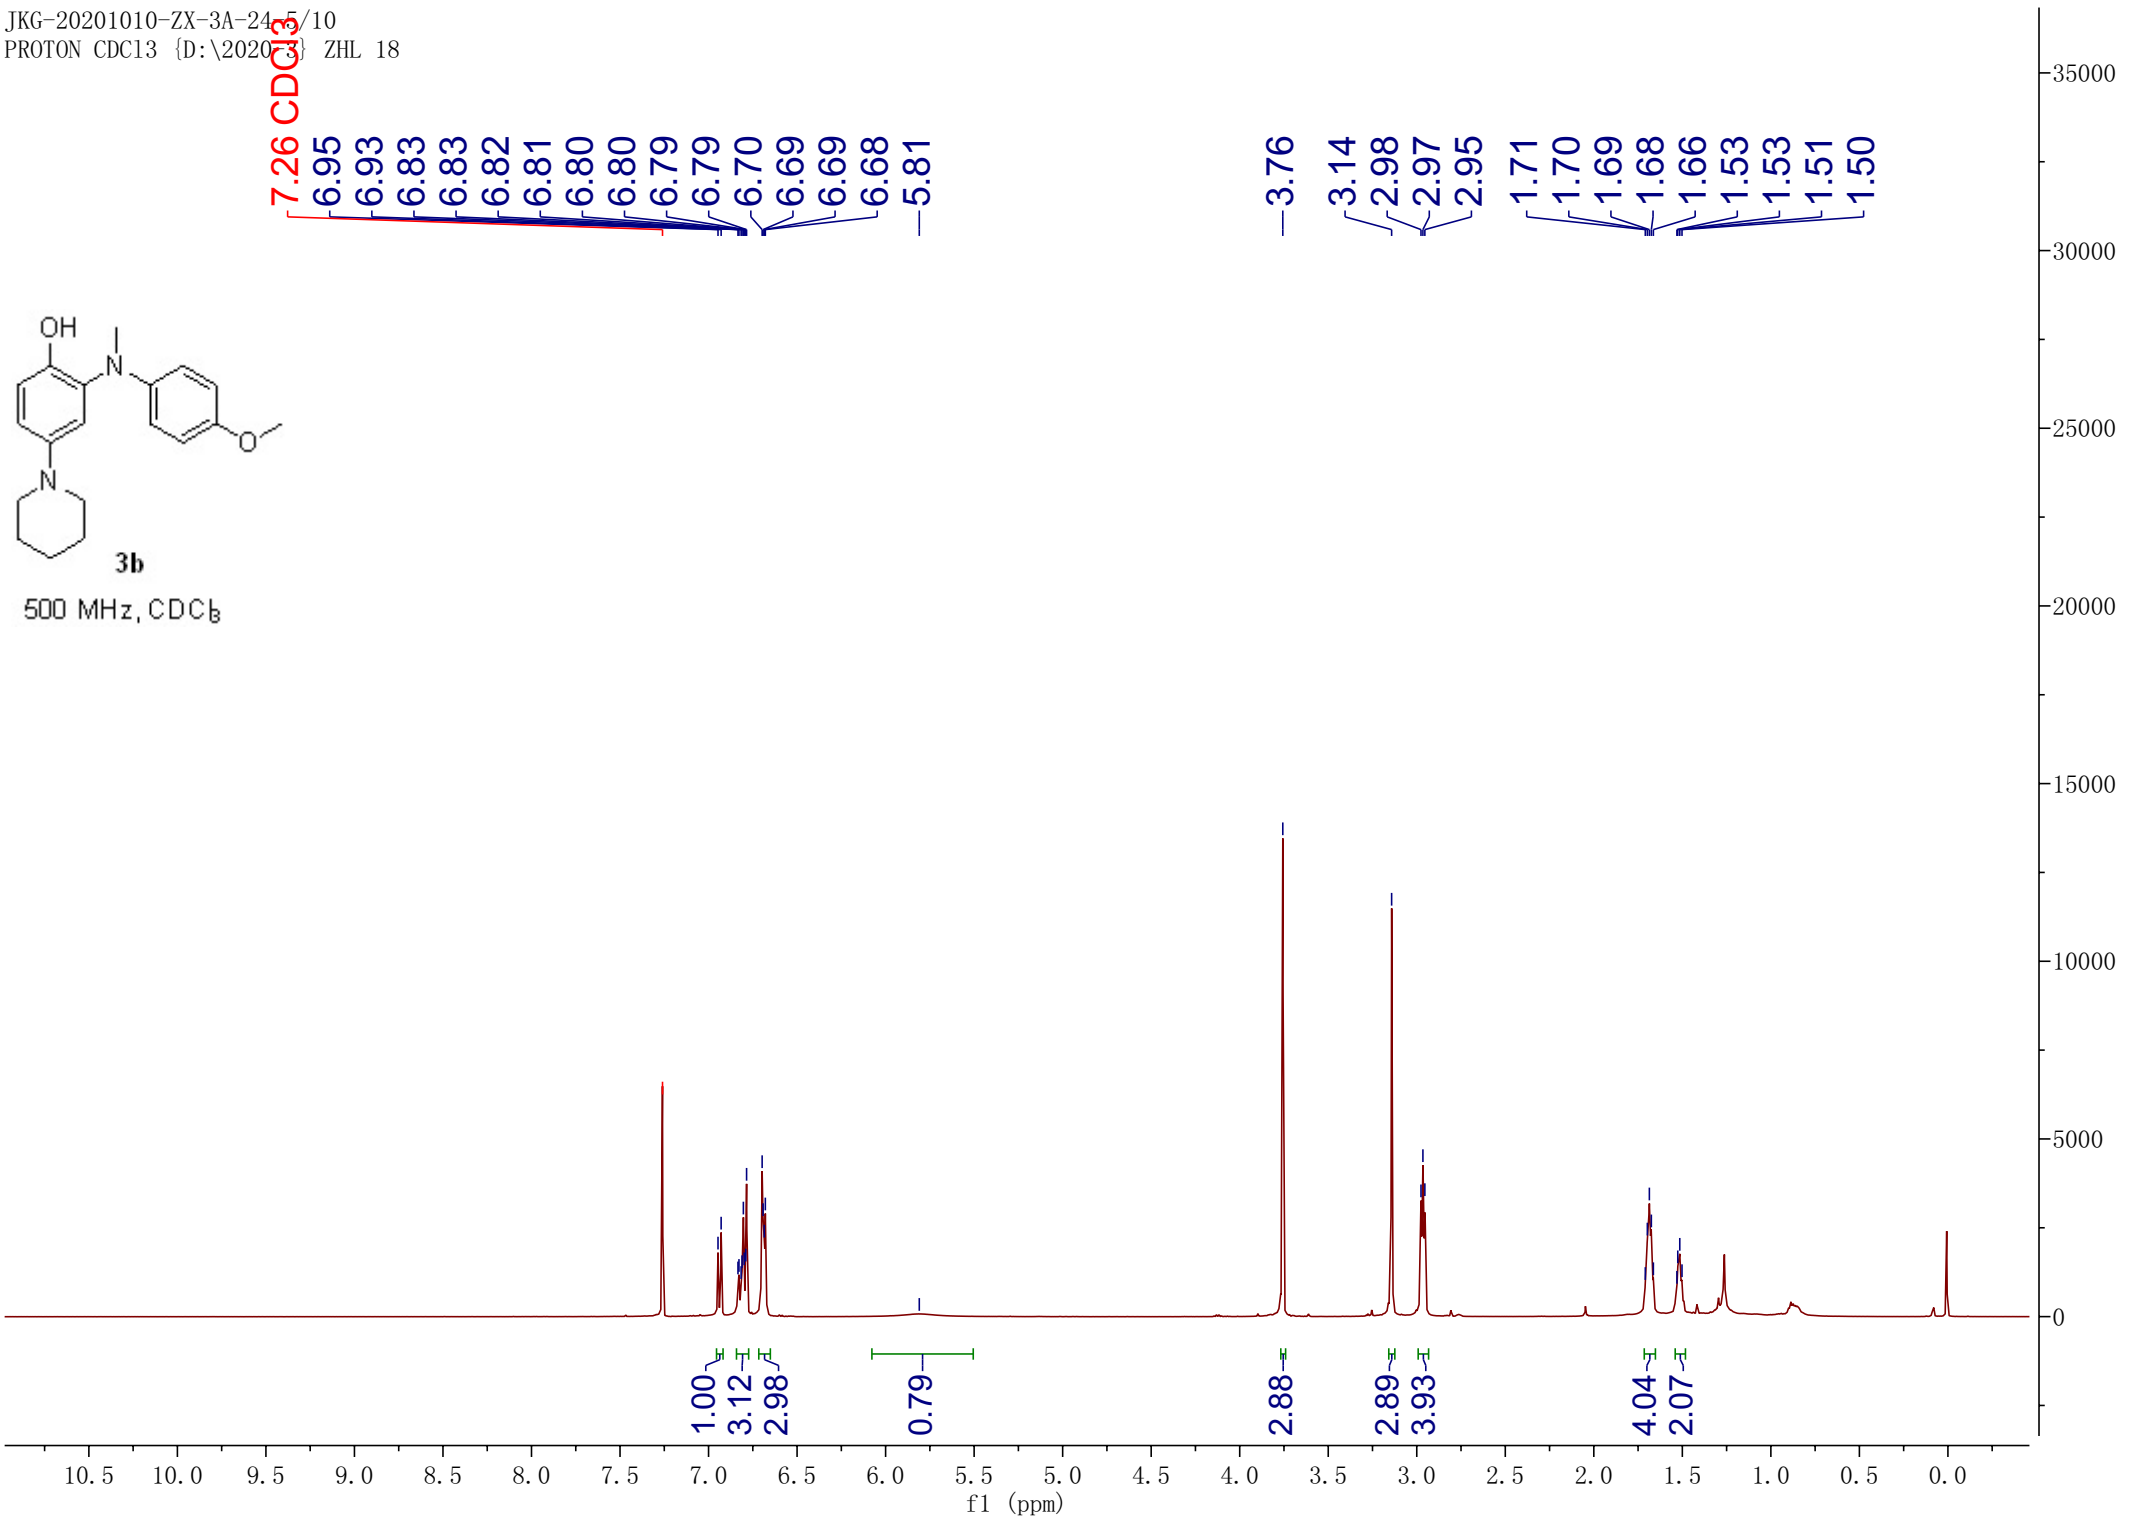

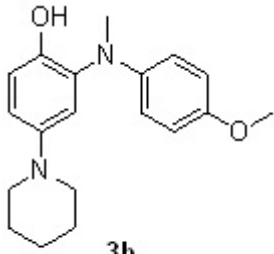

500 MHz, CDCl<sub>3</sub>

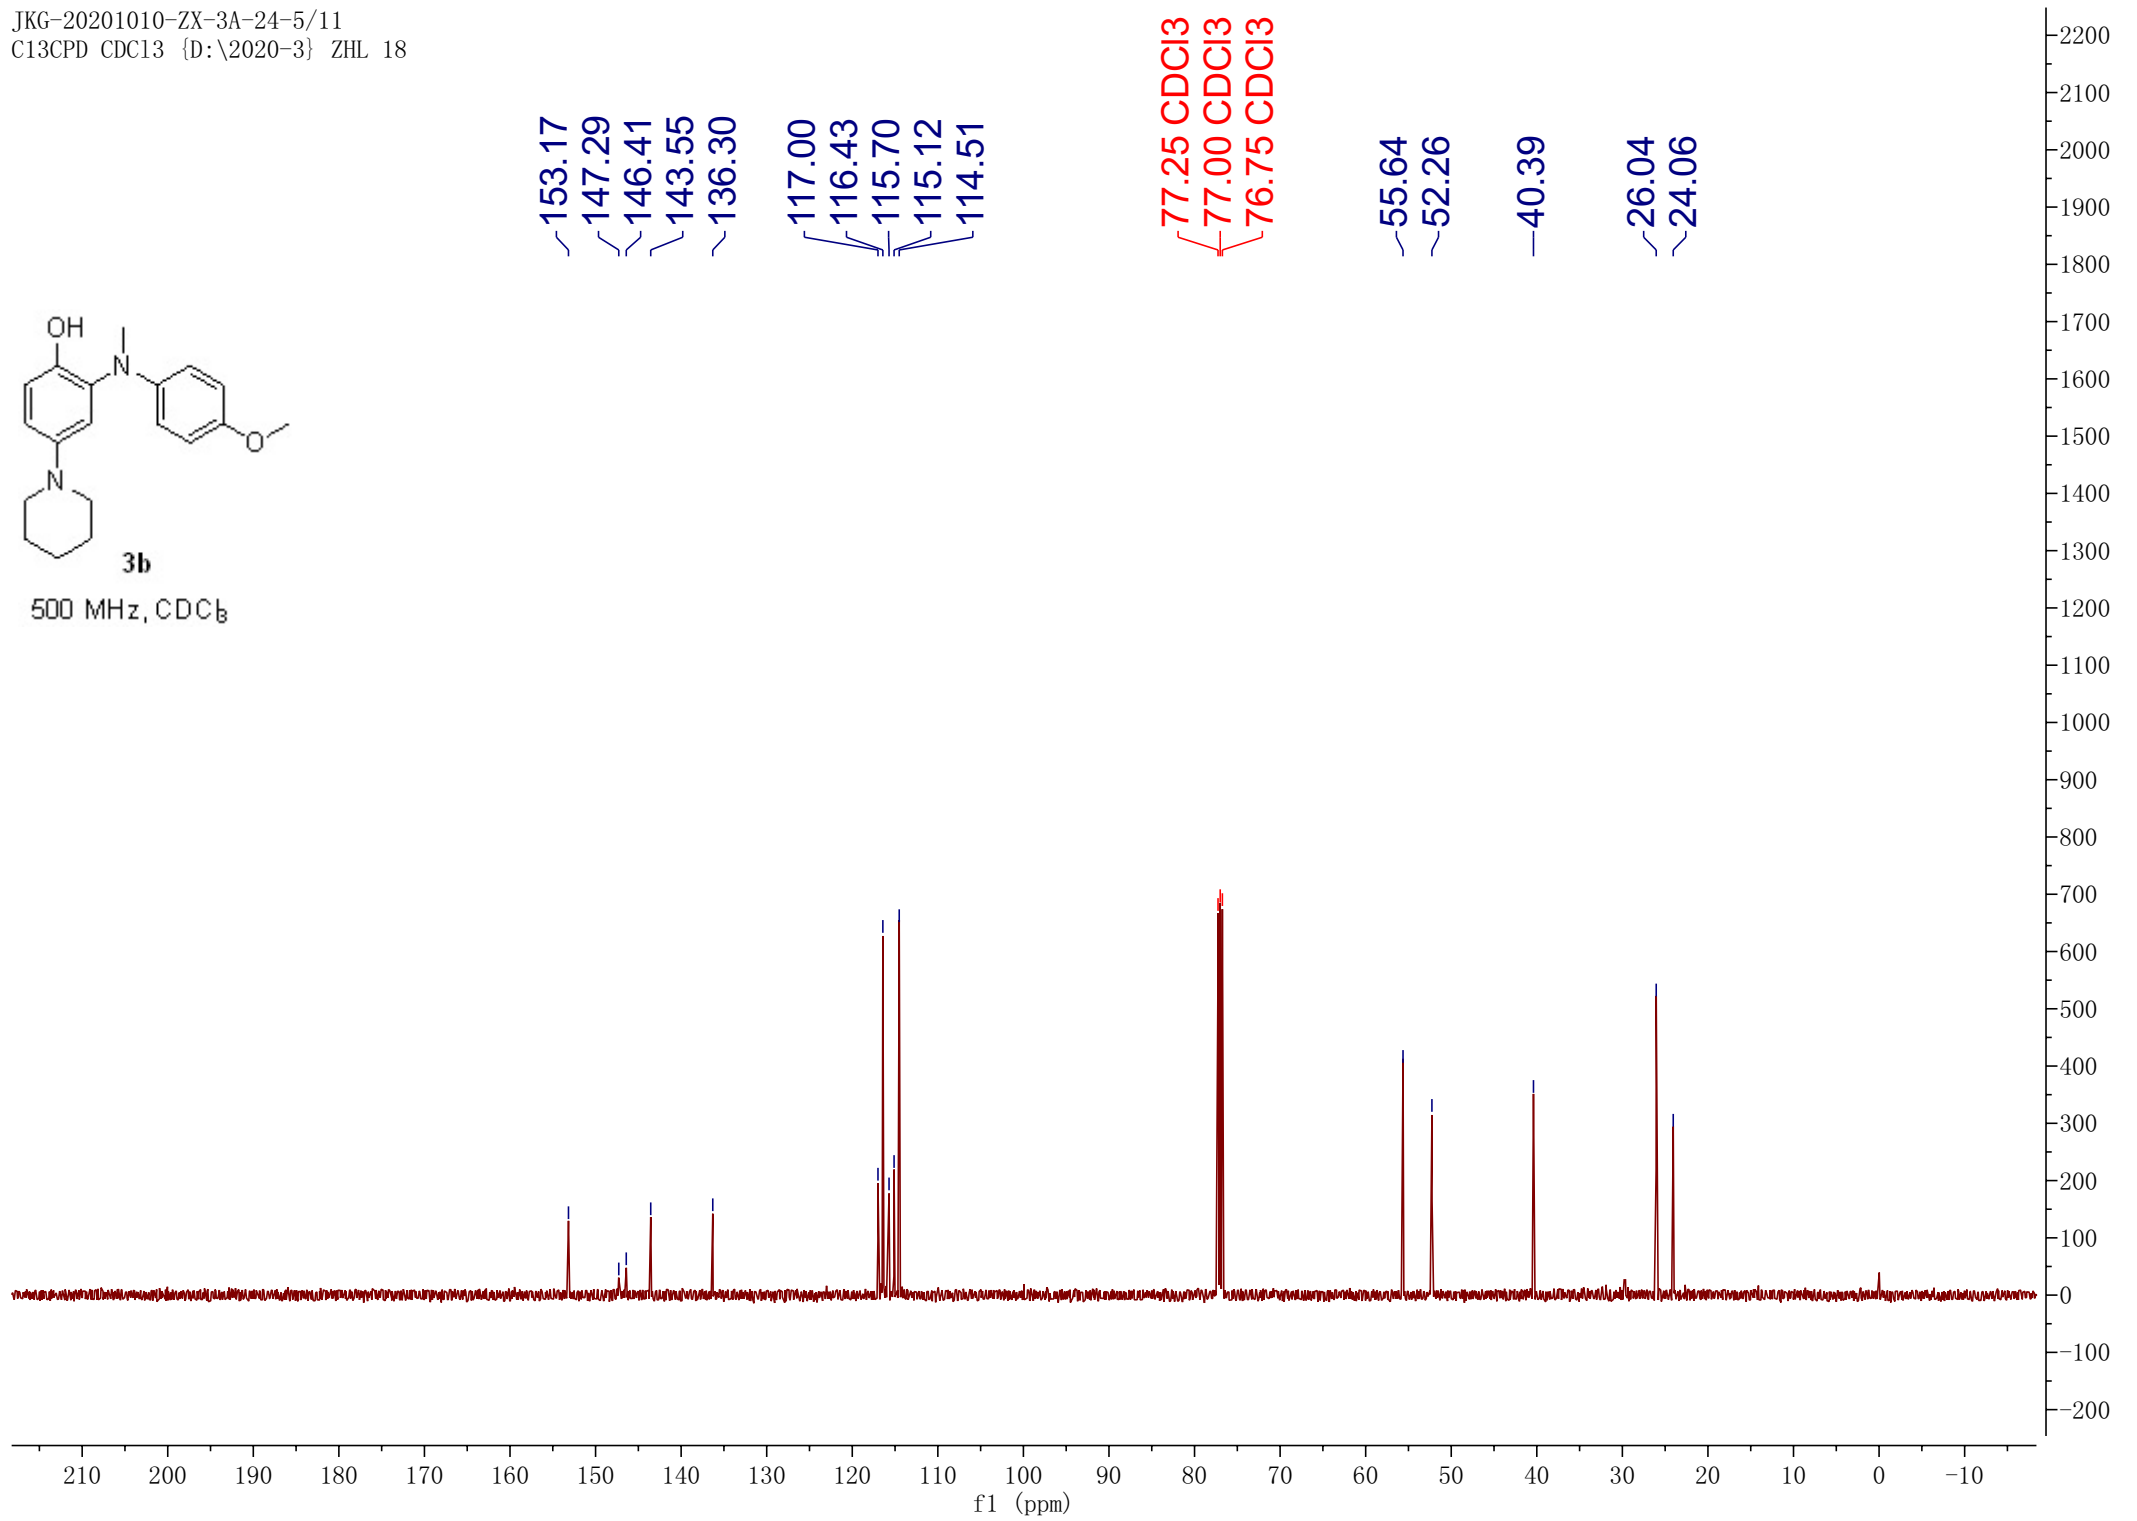

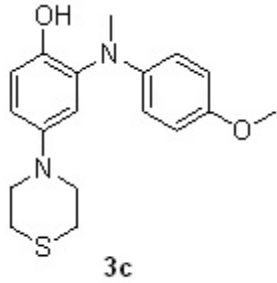

500 MHz, CDCl<sub>3</sub>

7.26 CDCl<sub>3</sub>  
6.96  
6.94  
6.81  
6.79  
6.70  
6.68  
6.65  
-5.83

3.76  
3.30  
3.29  
3.28  
-3.14  
2.75  
2.74  
2.73

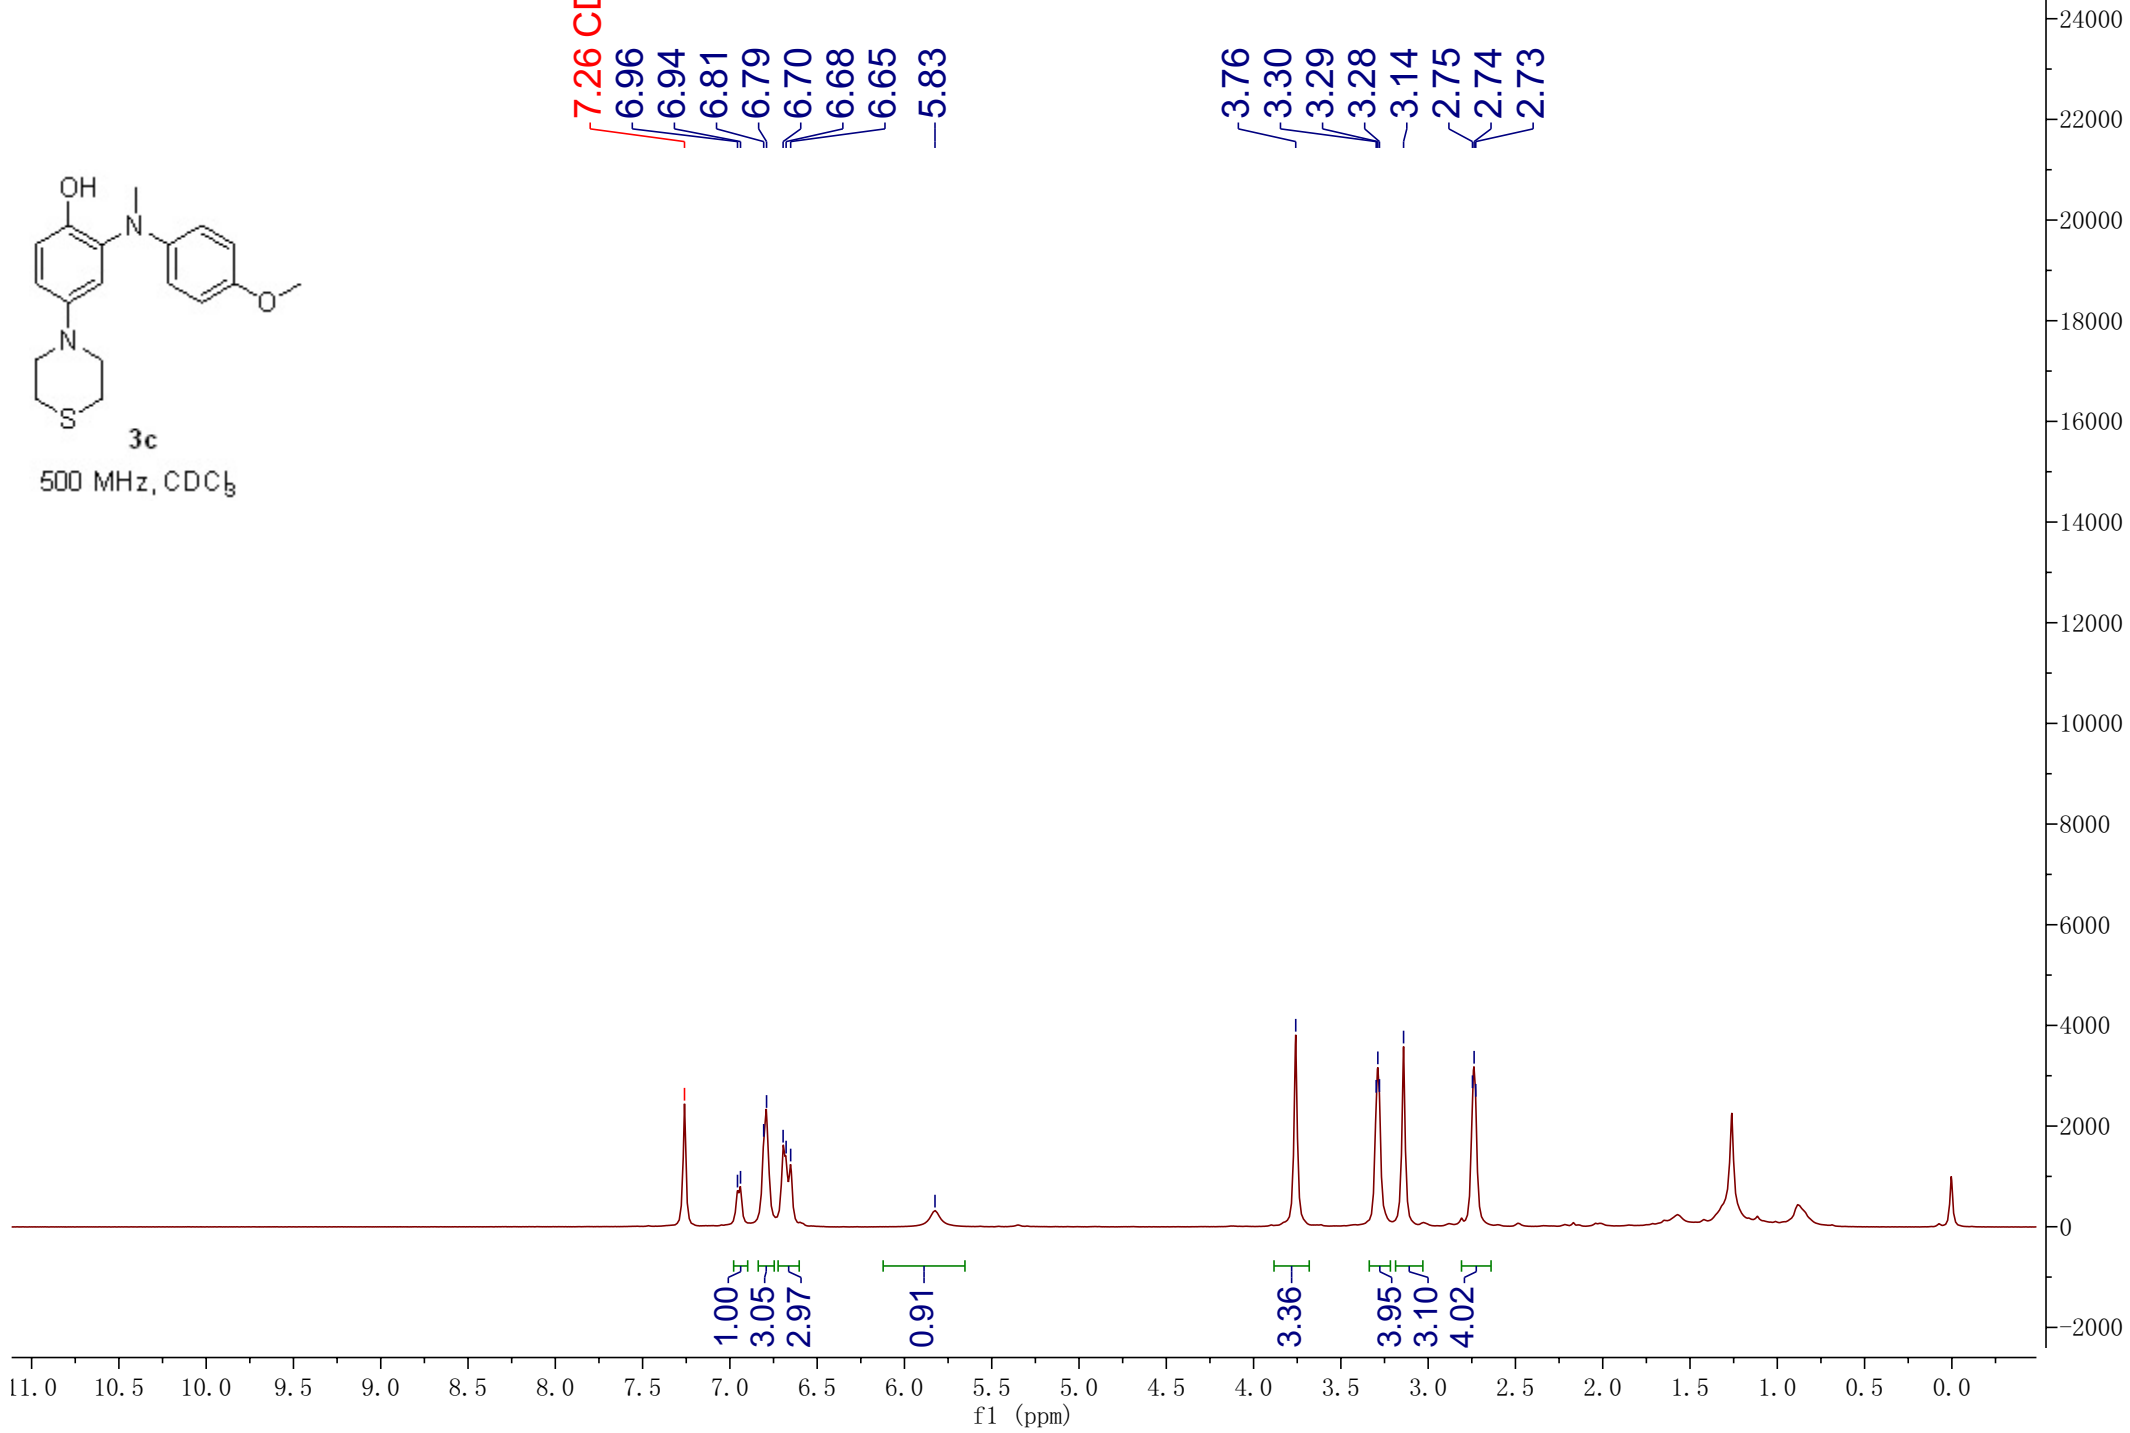

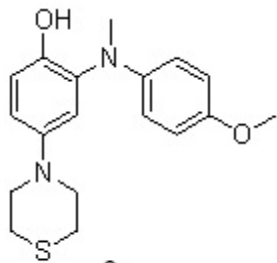

3c

500 MHz, CDCl<sub>3</sub>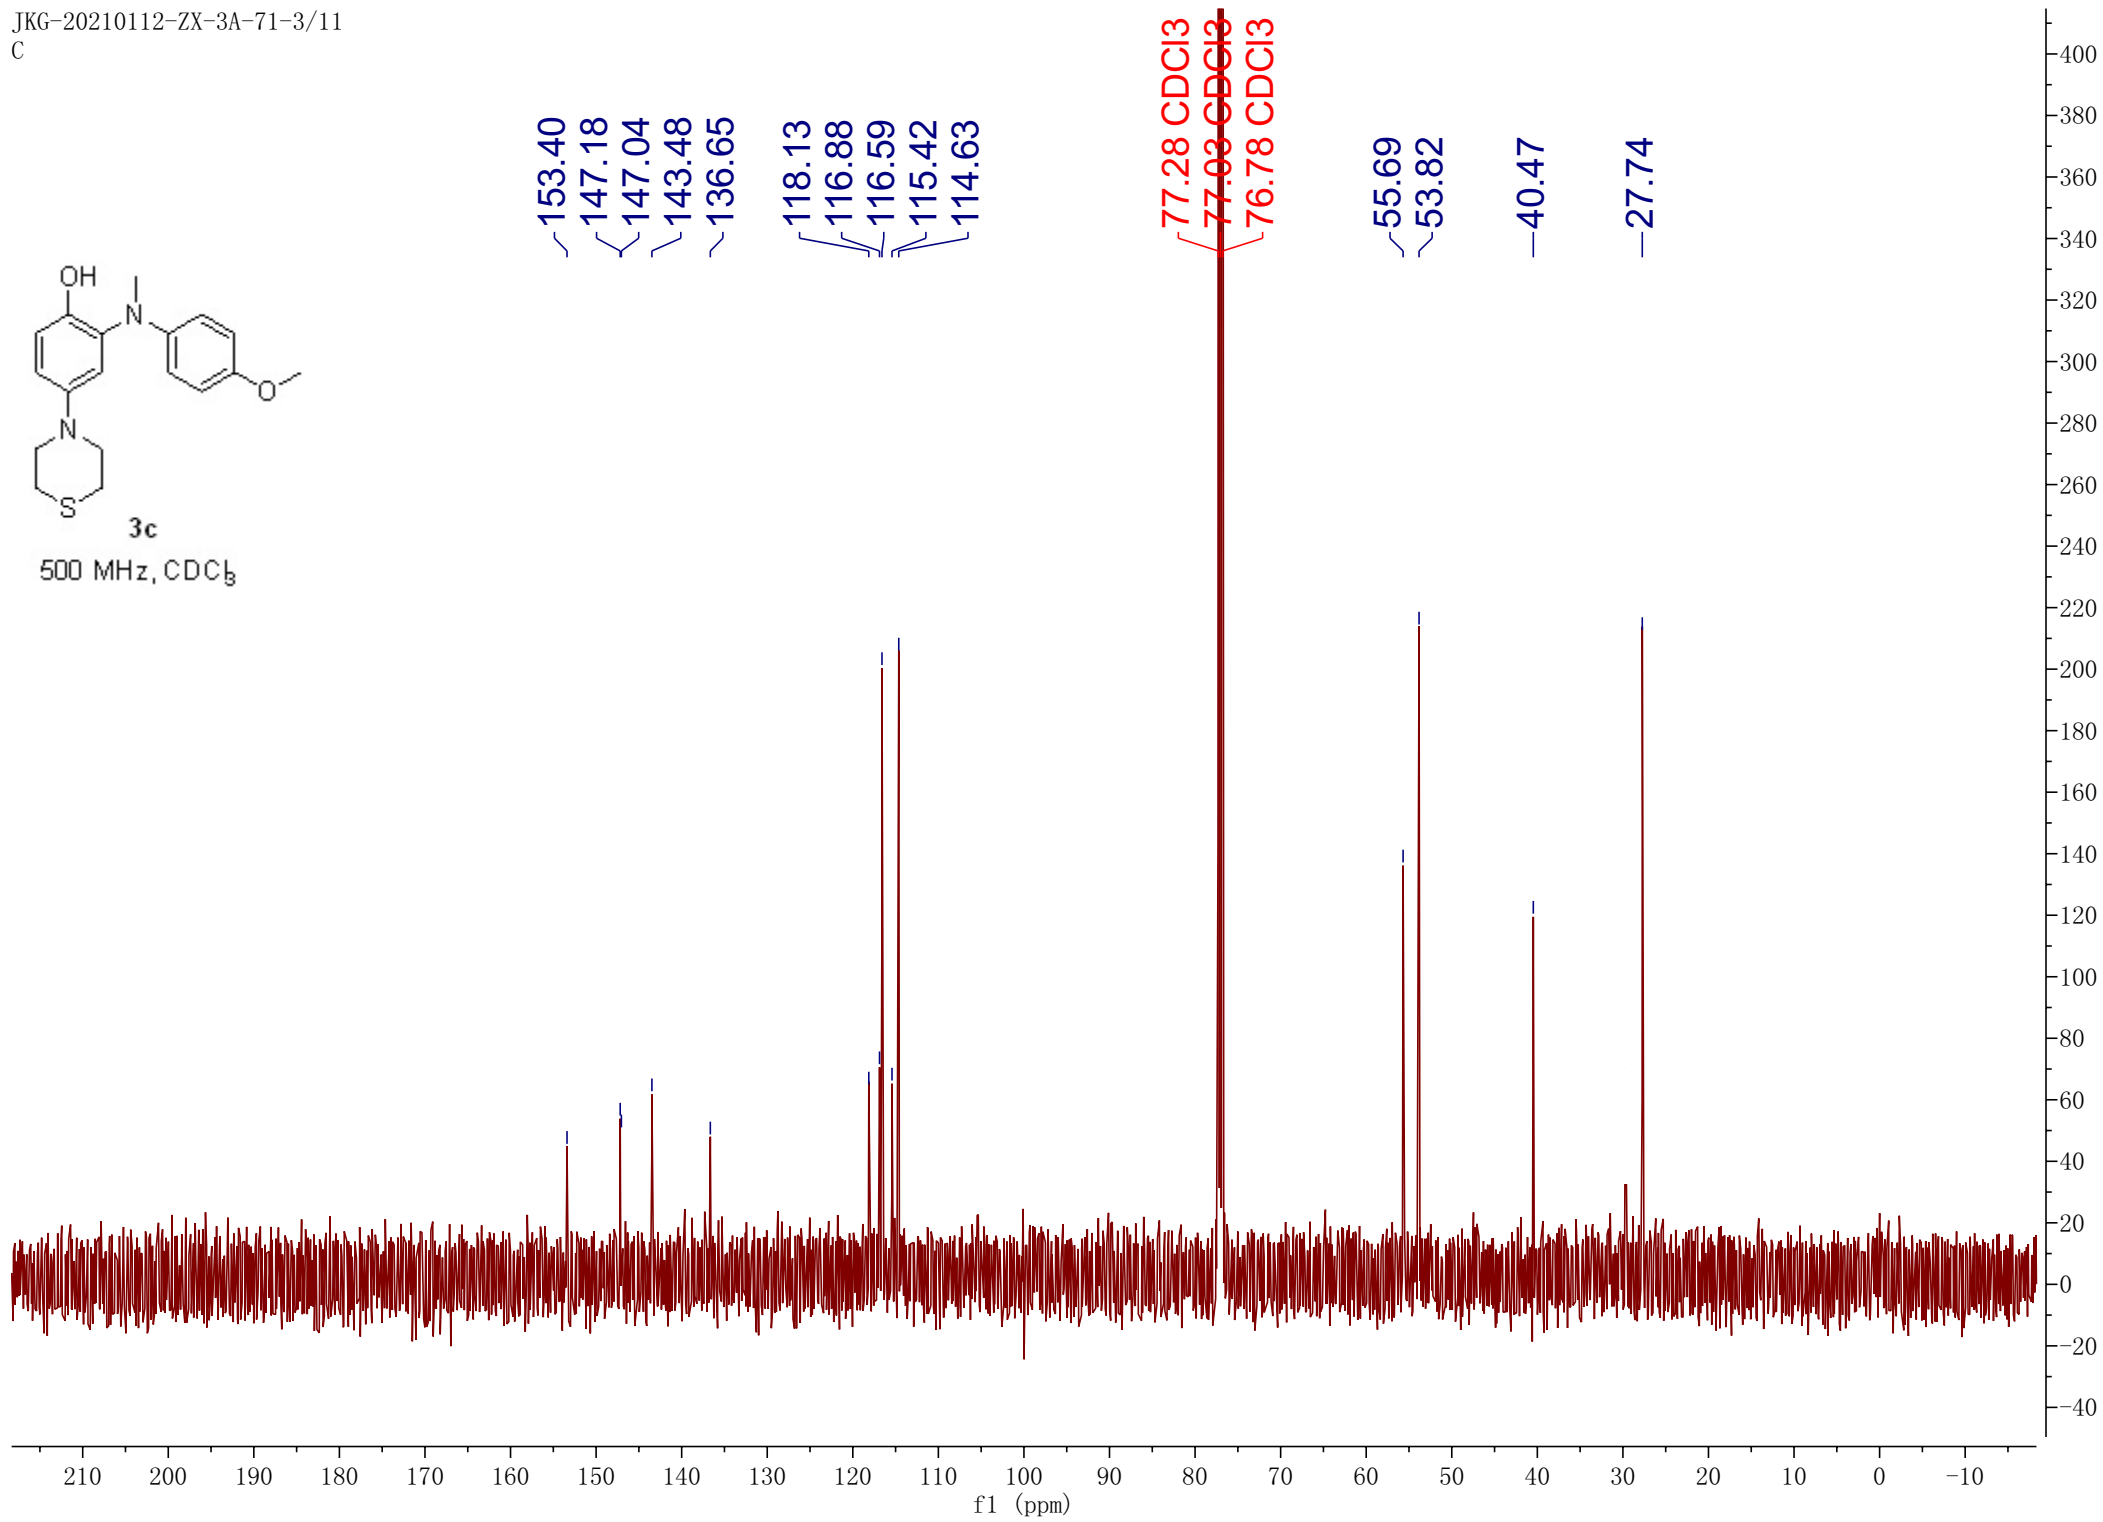

7.26 CDCl<sub>3</sub>

7.10  
7.10  
7.08  
7.08  
7.07  
7.05  
7.02  
7.00  
7.00  
6.92  
6.91  
6.89  
6.84  
6.83  
6.76  
6.74  
6.65  
6.64  
6.63  
6.54  
6.52  
6.12  
3.79  
3.78  
3.56  
3.55  
3.54  
3.17  
2.87  
2.86  
2.84  
2.08  
2.06  
2.05  
2.04  
2.03

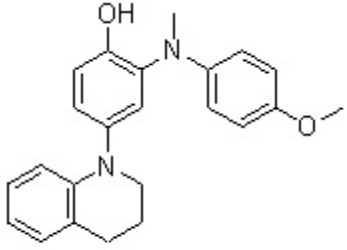

**3d**

500 MHz, CDCl<sub>3</sub>

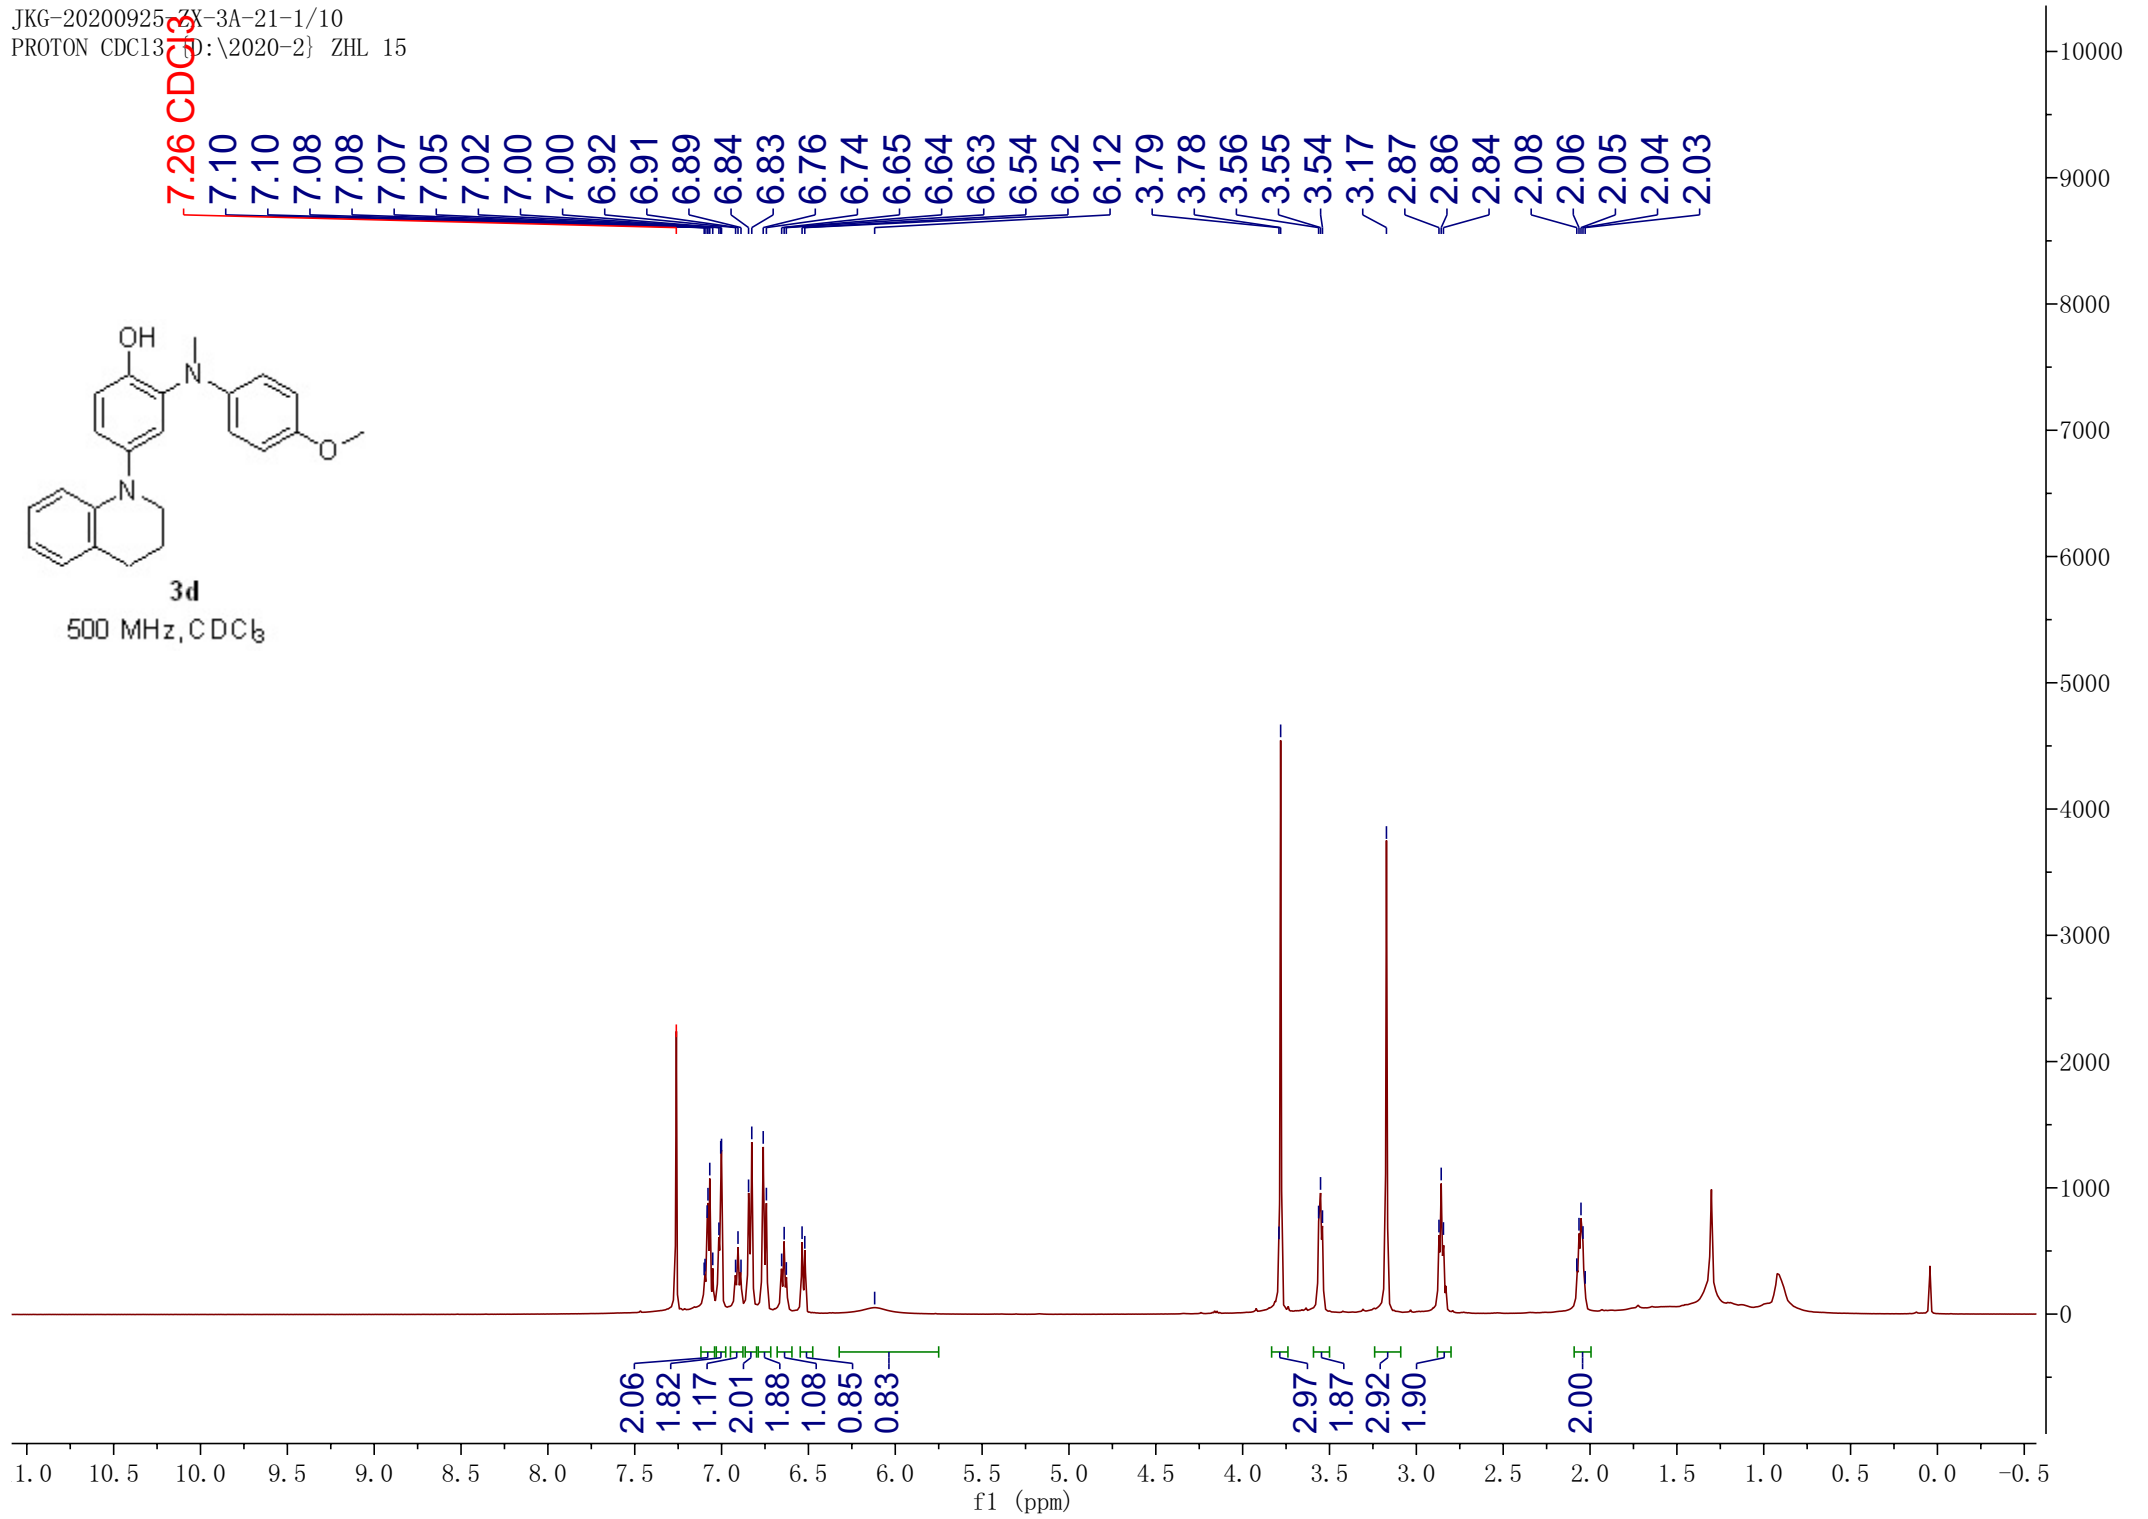

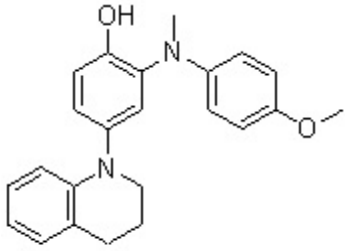

500 MHz, CDCl<sub>3</sub>

153.50  
149.73  
145.28  
143.34  
141.54  
137.20  
129.25  
126.41  
125.75  
124.27  
122.95  
117.23  
116.78  
115.78  
114.57  
114.12

77.25 CDCl<sub>3</sub>  
77.00 CDCl<sub>3</sub>  
76.75 CDCl<sub>3</sub>

55.61  
51.56

40.58

27.78  
22.49

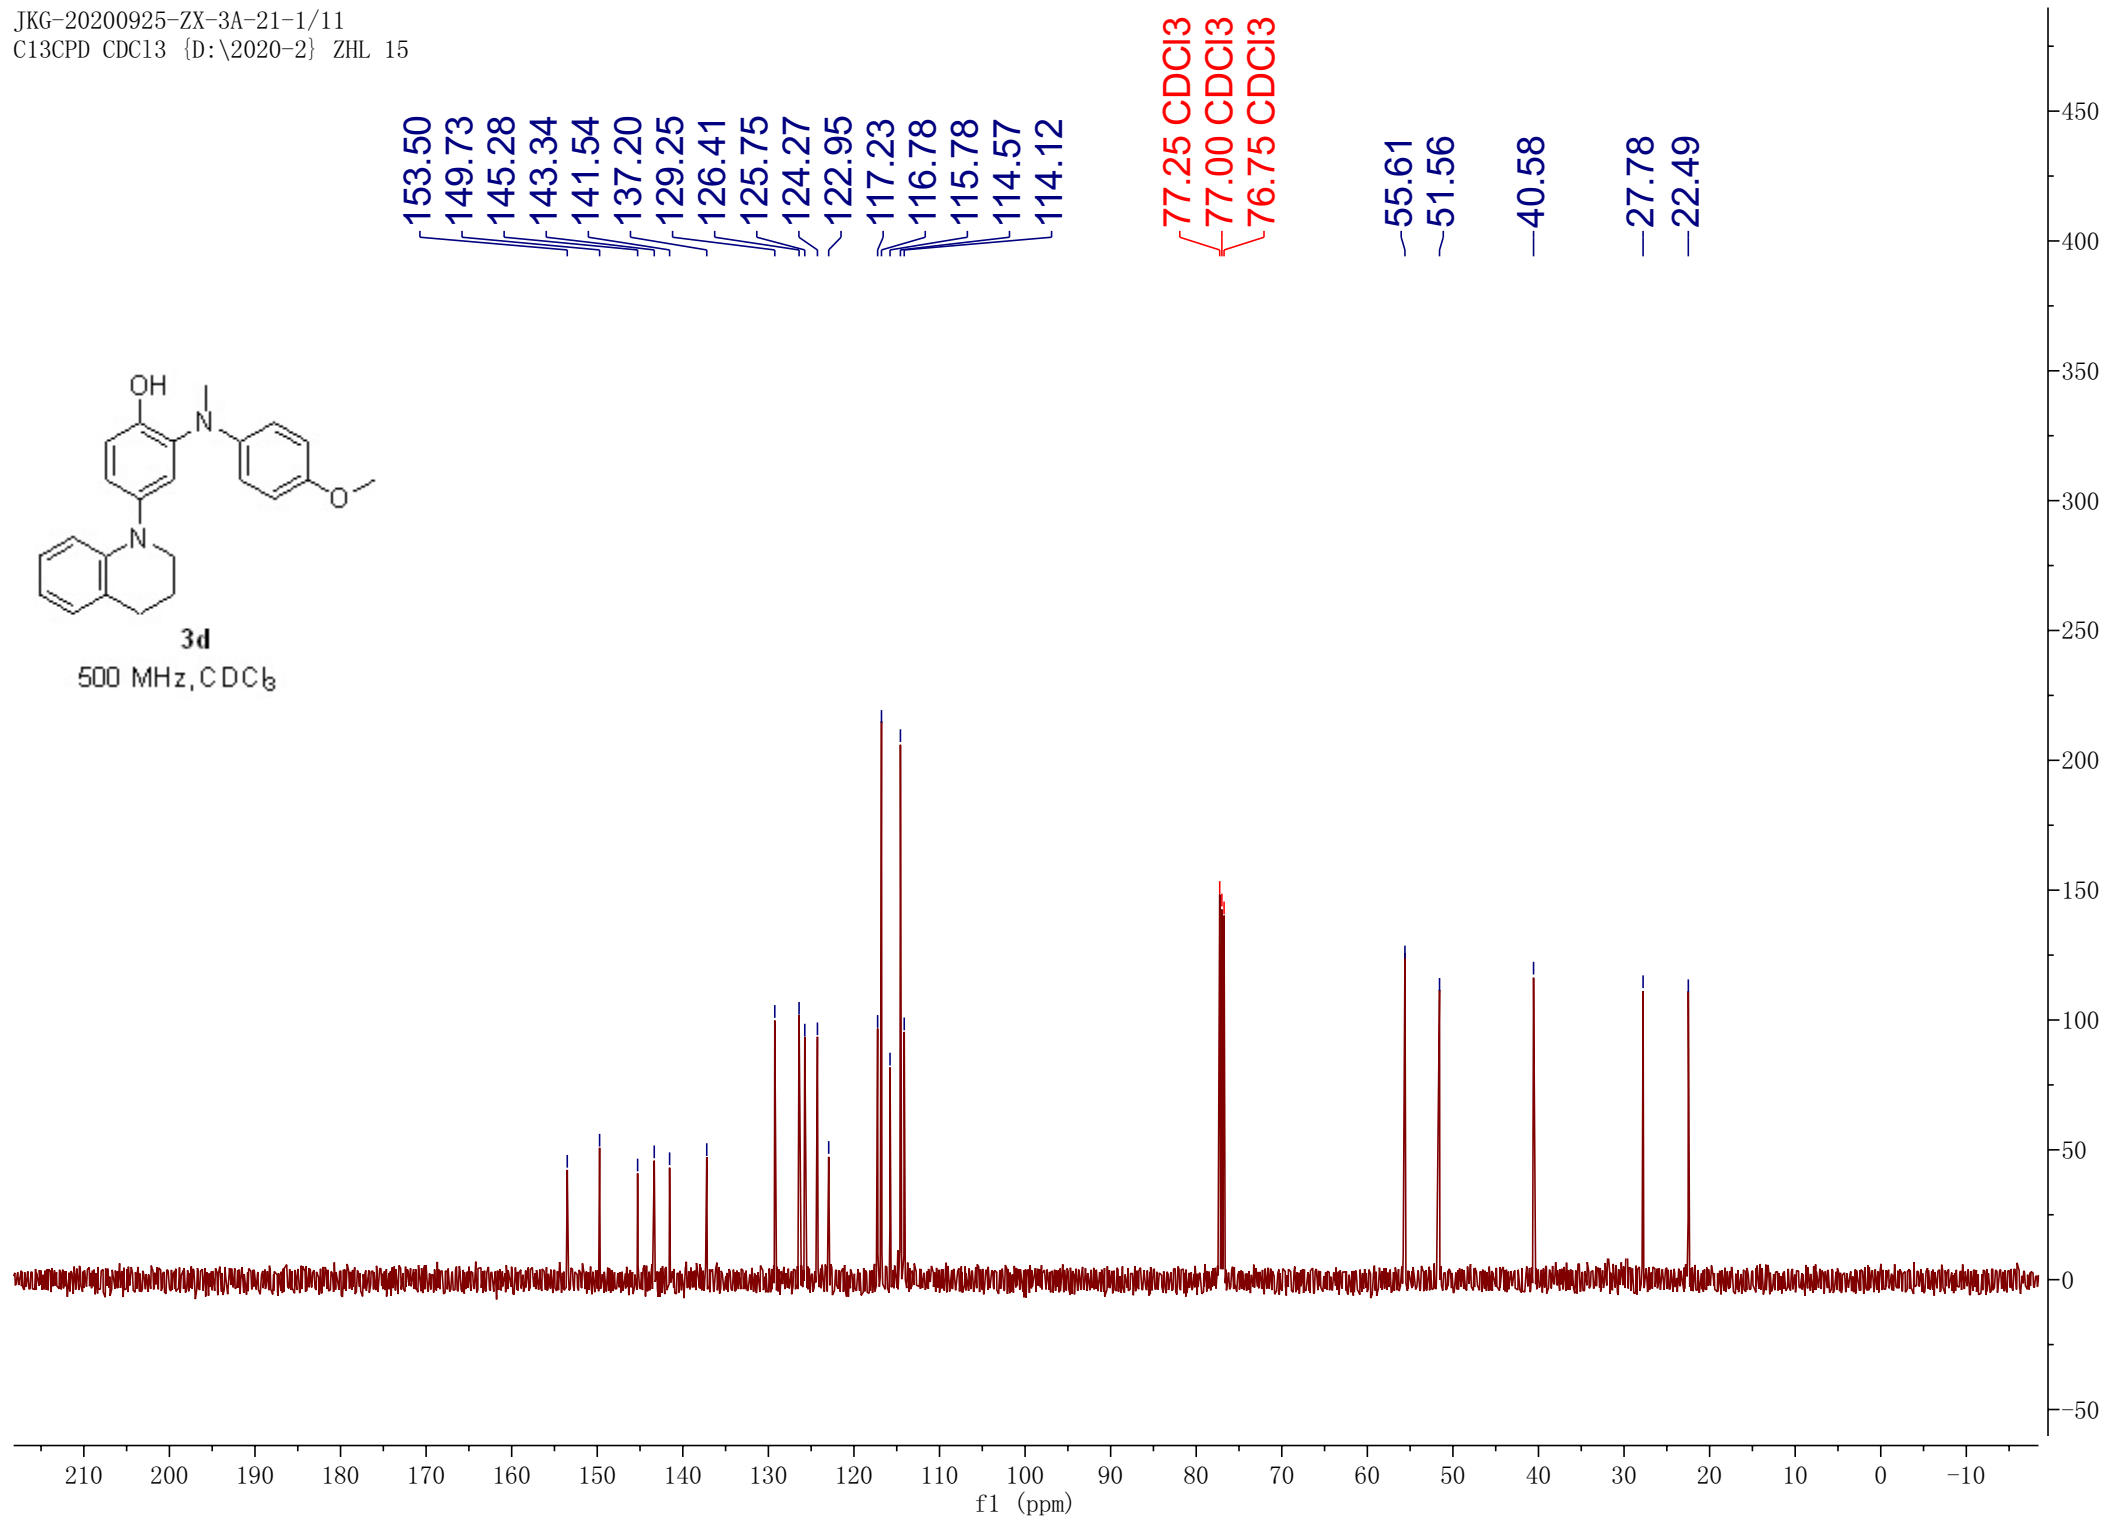

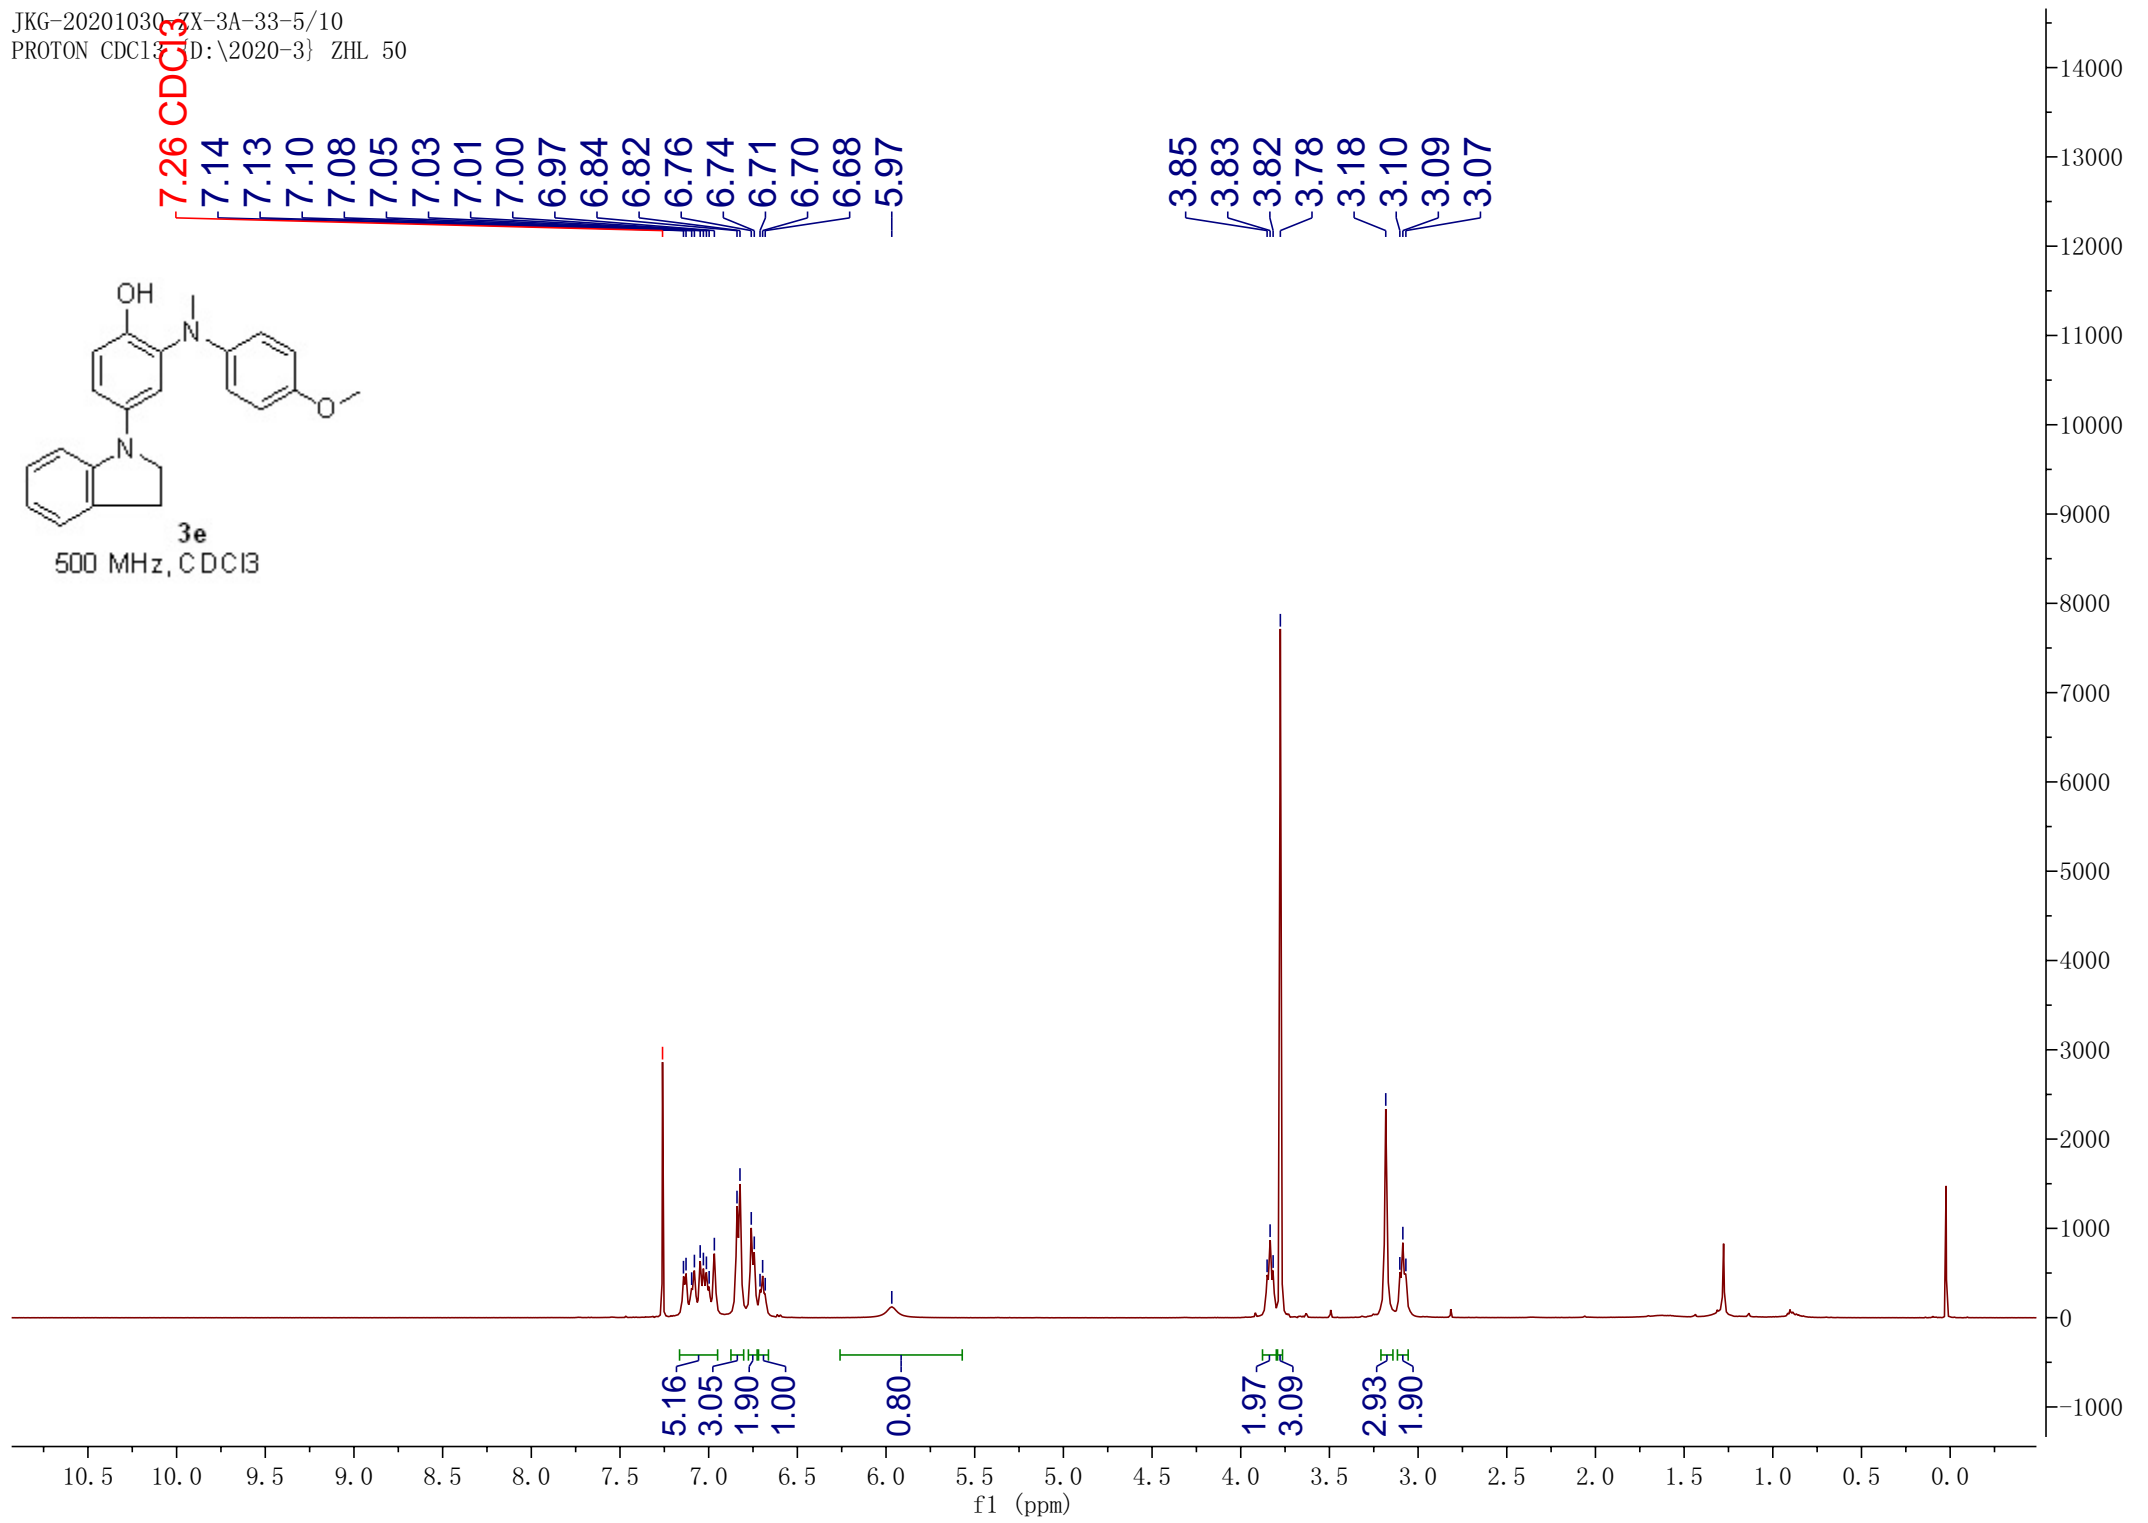

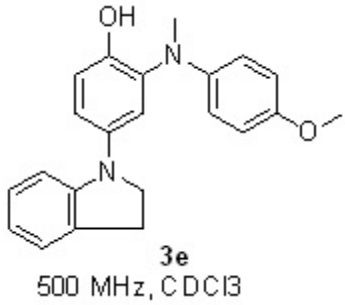

153.46  
148.26  
147.60  
143.37  
138.21  
136.72  
130.59  
127.05  
124.84  
118.84  
118.20  
117.24  
116.74  
115.50  
114.88  
114.60  
113.65  
107.23

77.25 CDC13  
77.00 CDC13  
76.75 CDC13

55.64  
52.97

40.50

28.20

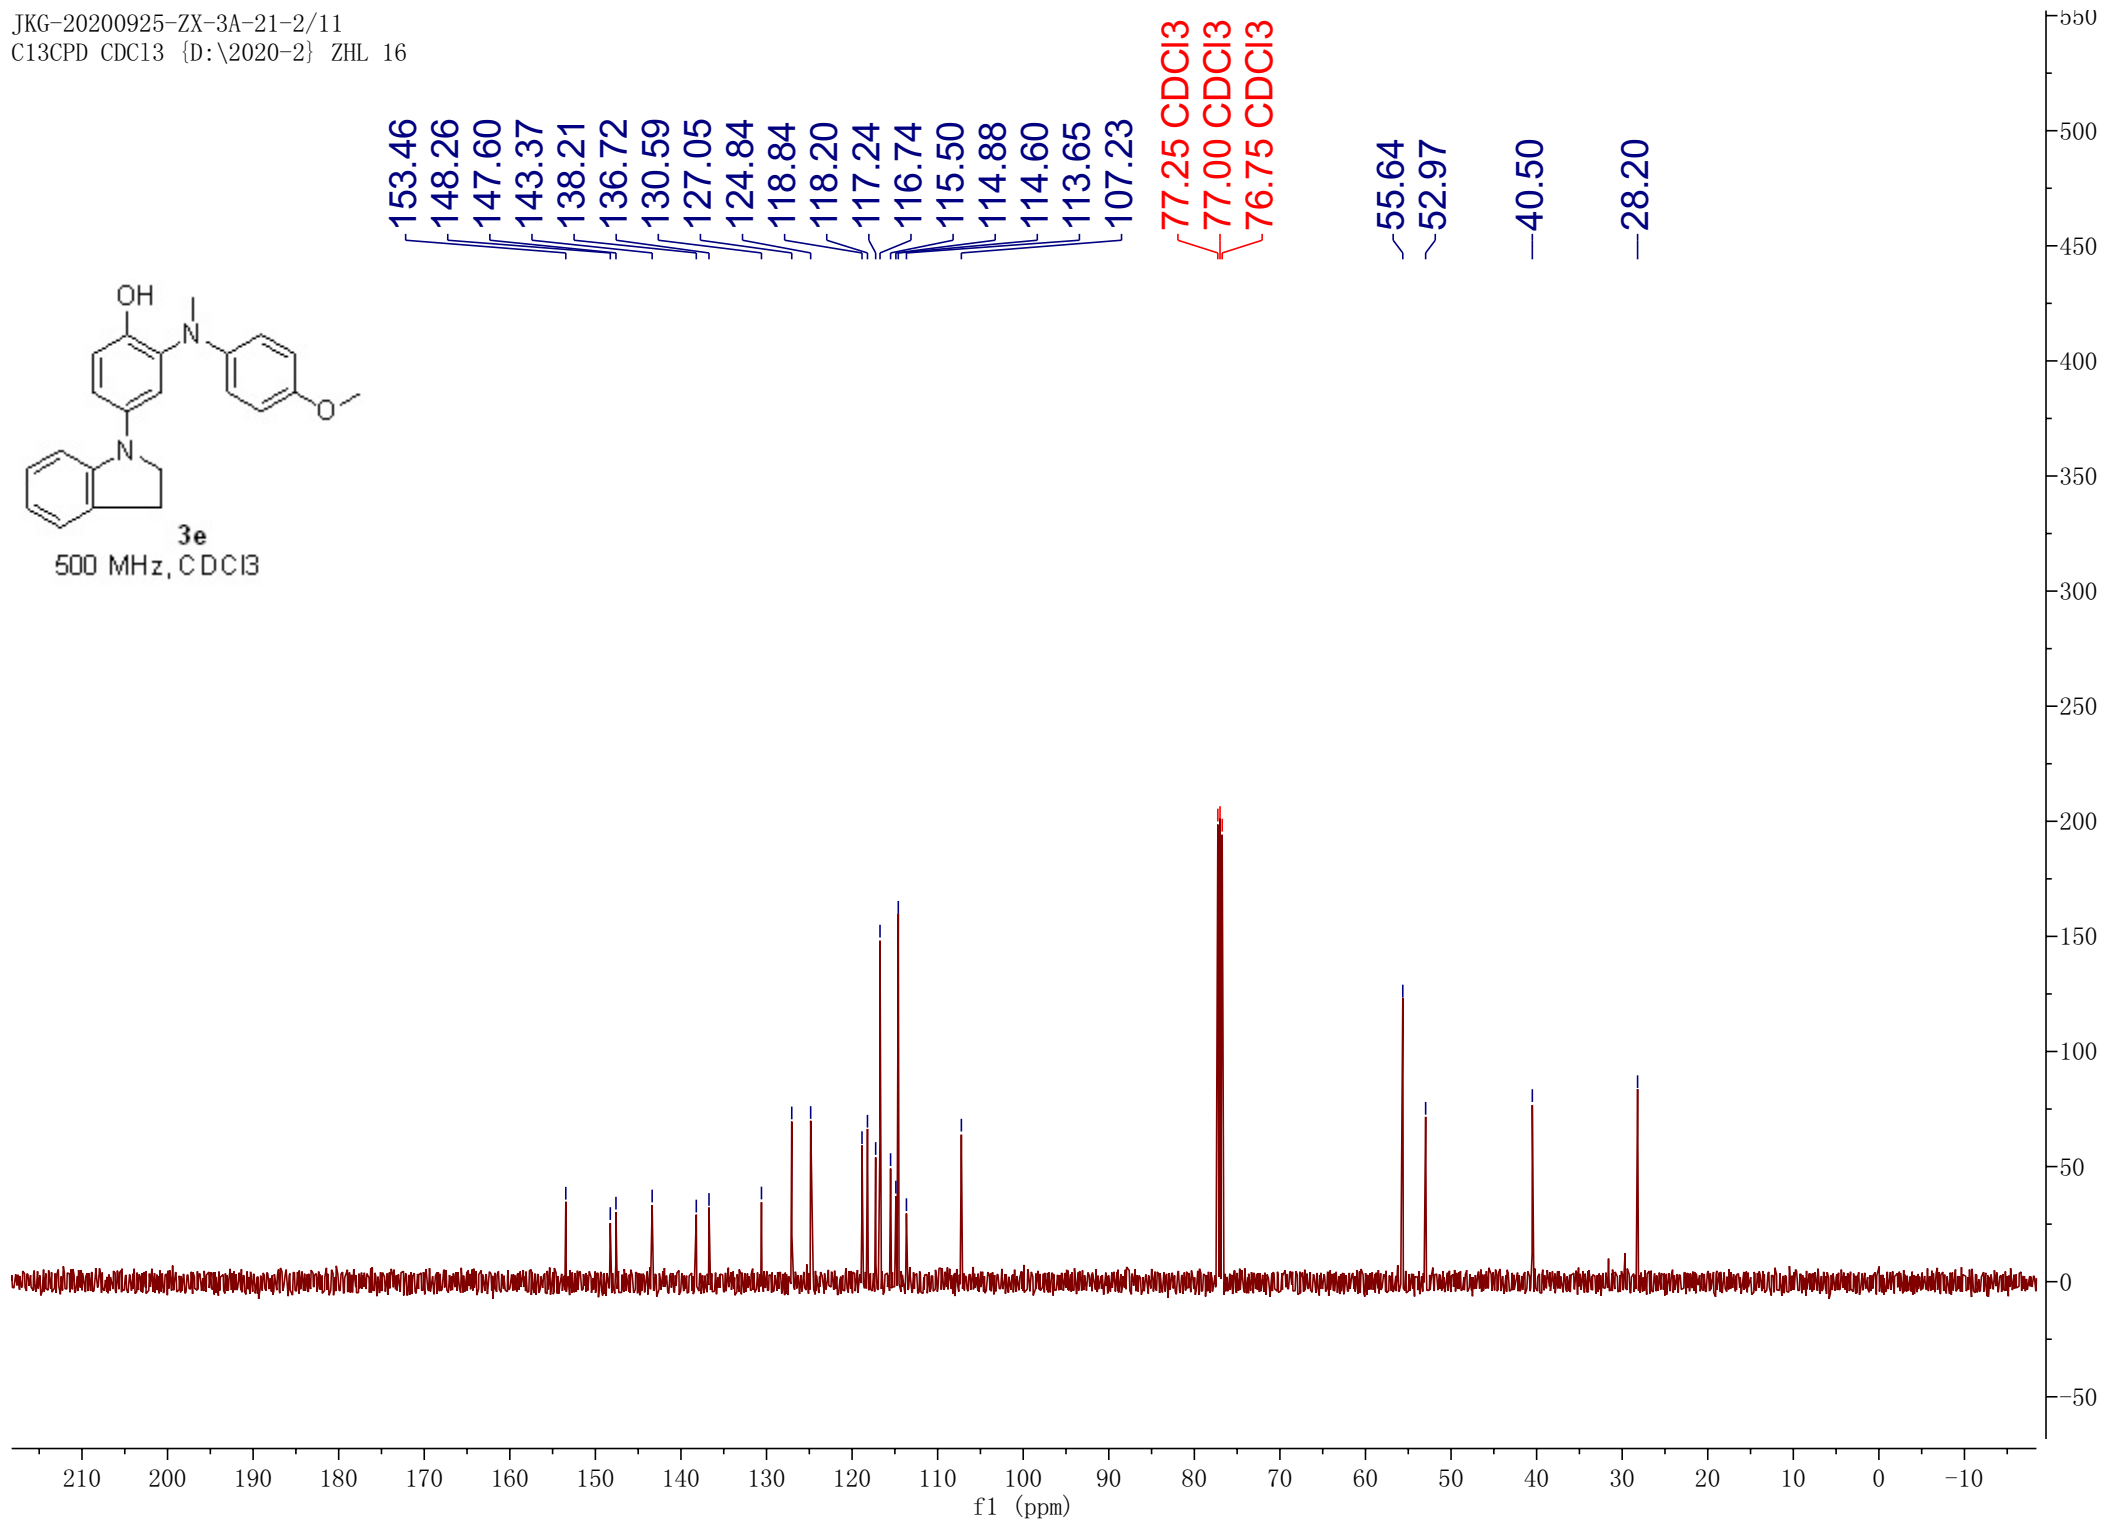



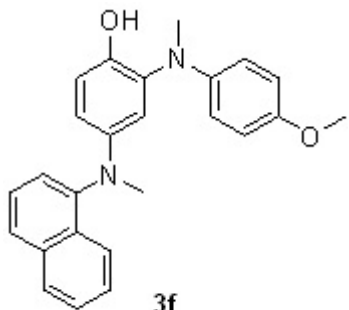

500 MHz, CD<sub>3</sub>OD

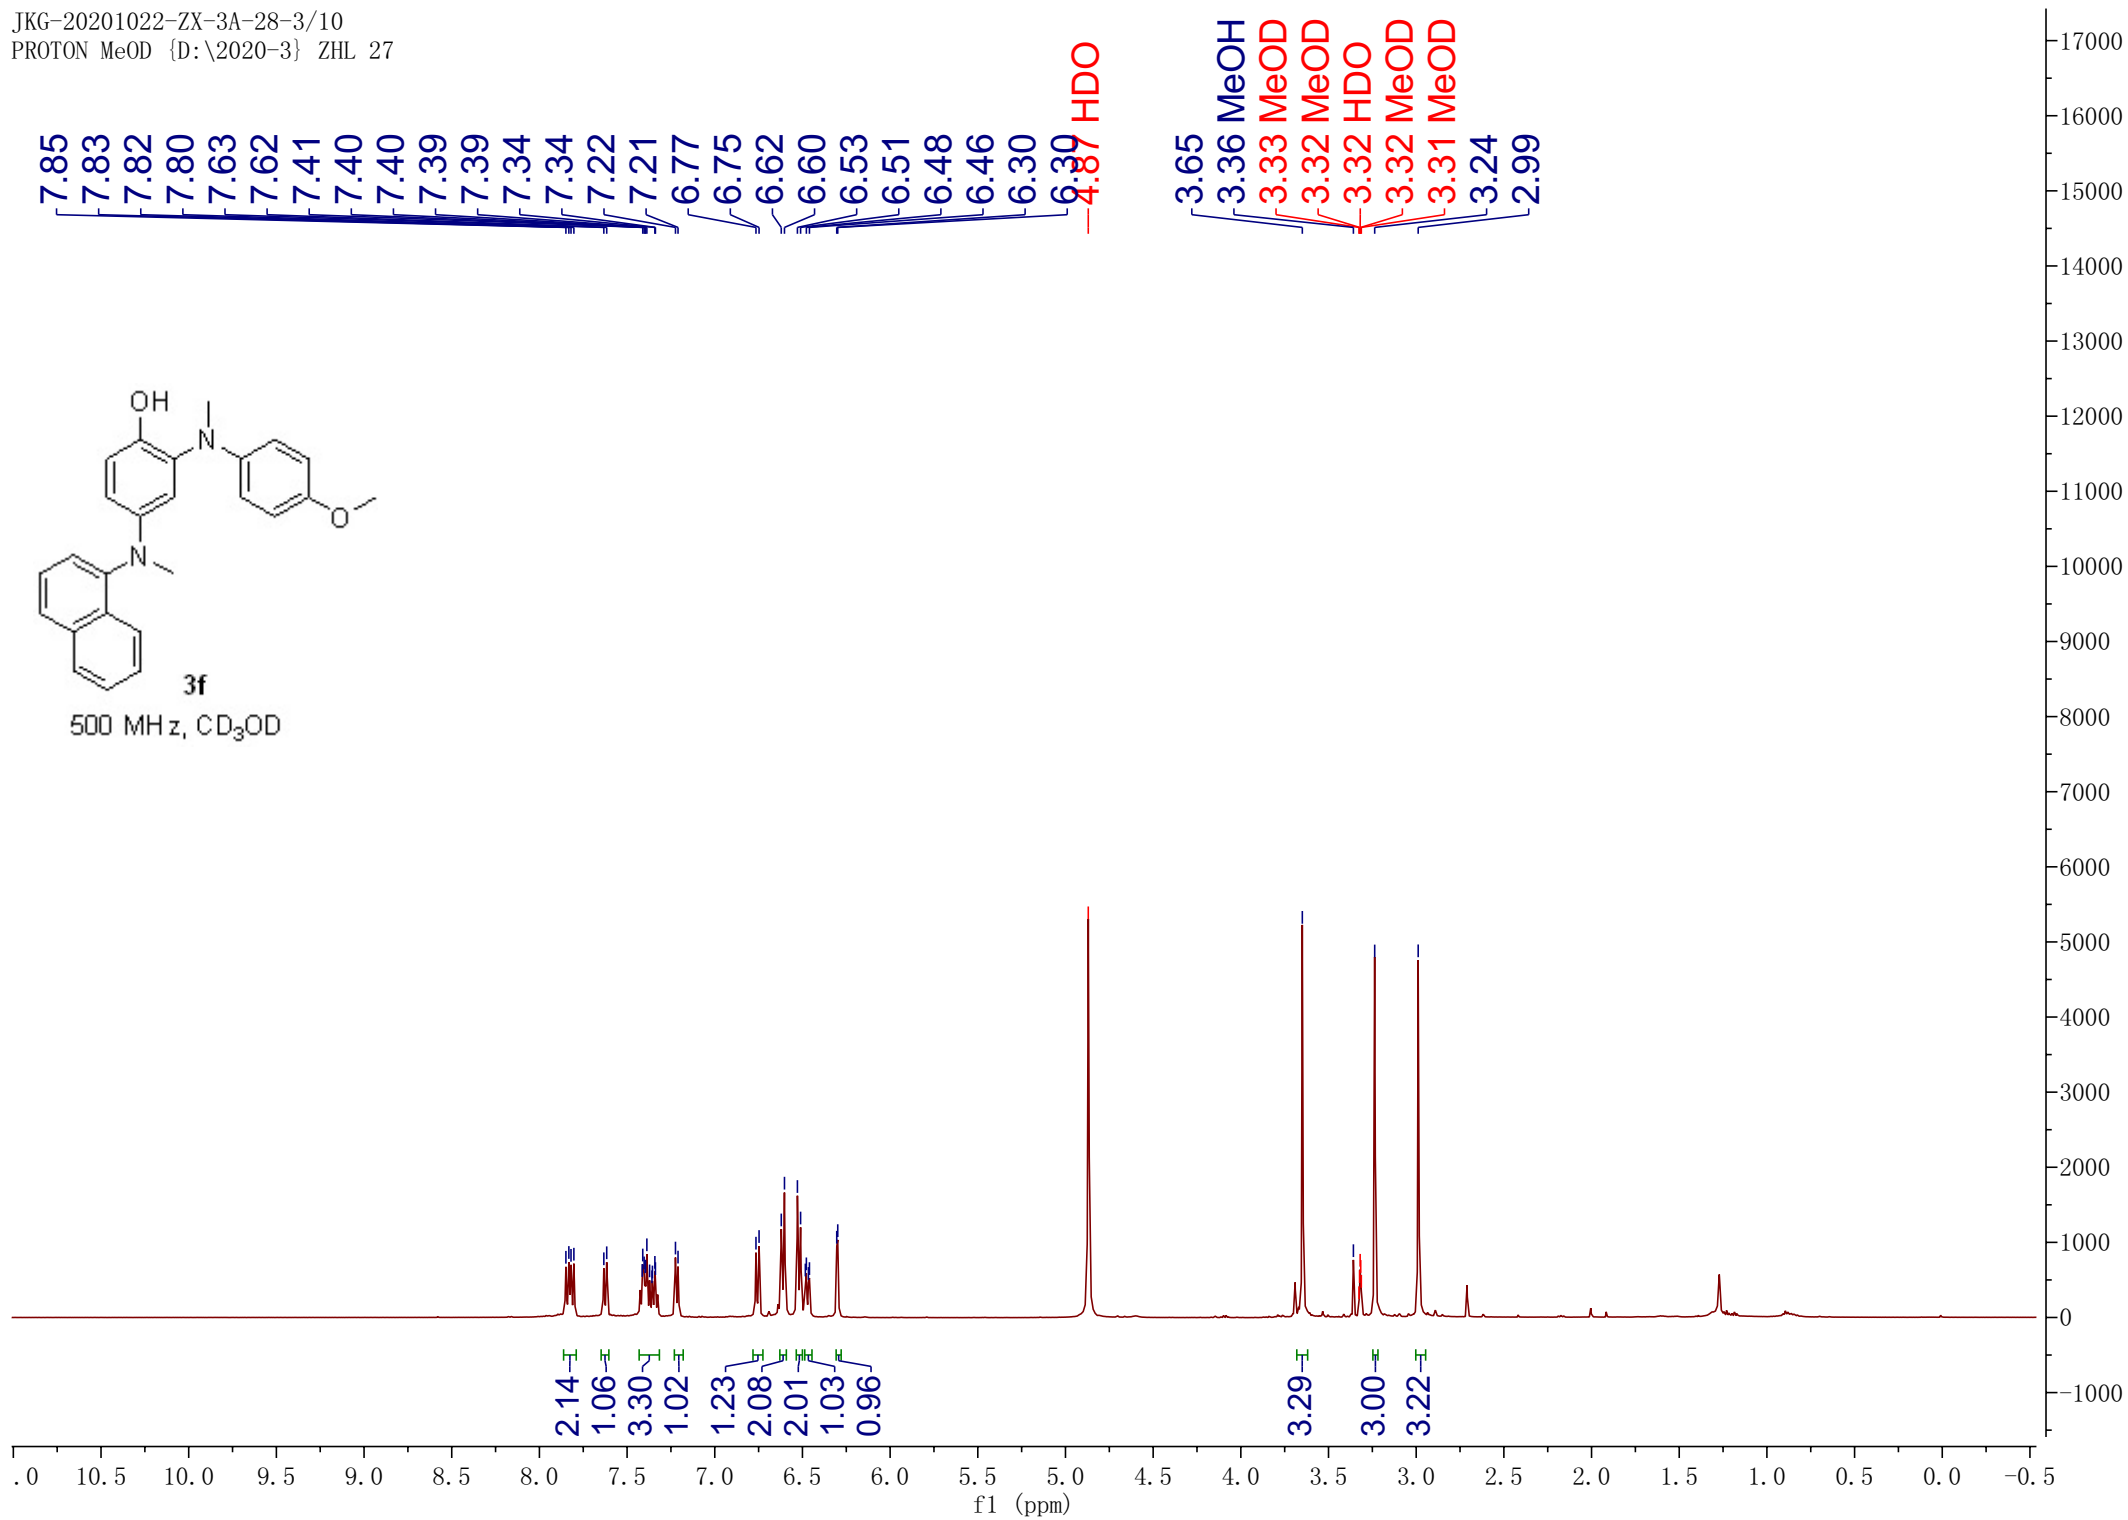

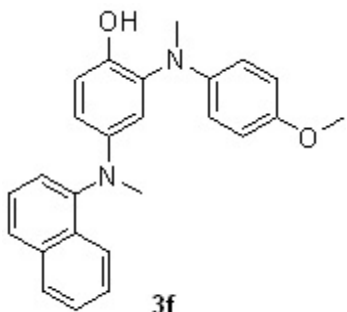

500 MHz, CD<sub>3</sub>OD

153.66  
147.68  
146.97  
146.52  
138.02  
136.54  
131.89  
129.43  
127.25  
126.92  
126.72  
126.45  
125.19  
123.79  
117.76  
116.76  
116.07  
115.61  
115.19

56.06  
49.51 MeOD  
49.34 MeOD  
49.17 MeOD  
49.00 MeOD  
48.83 MeOD  
48.66 MeOD  
48.49 MeOD  
41.70  
39.90

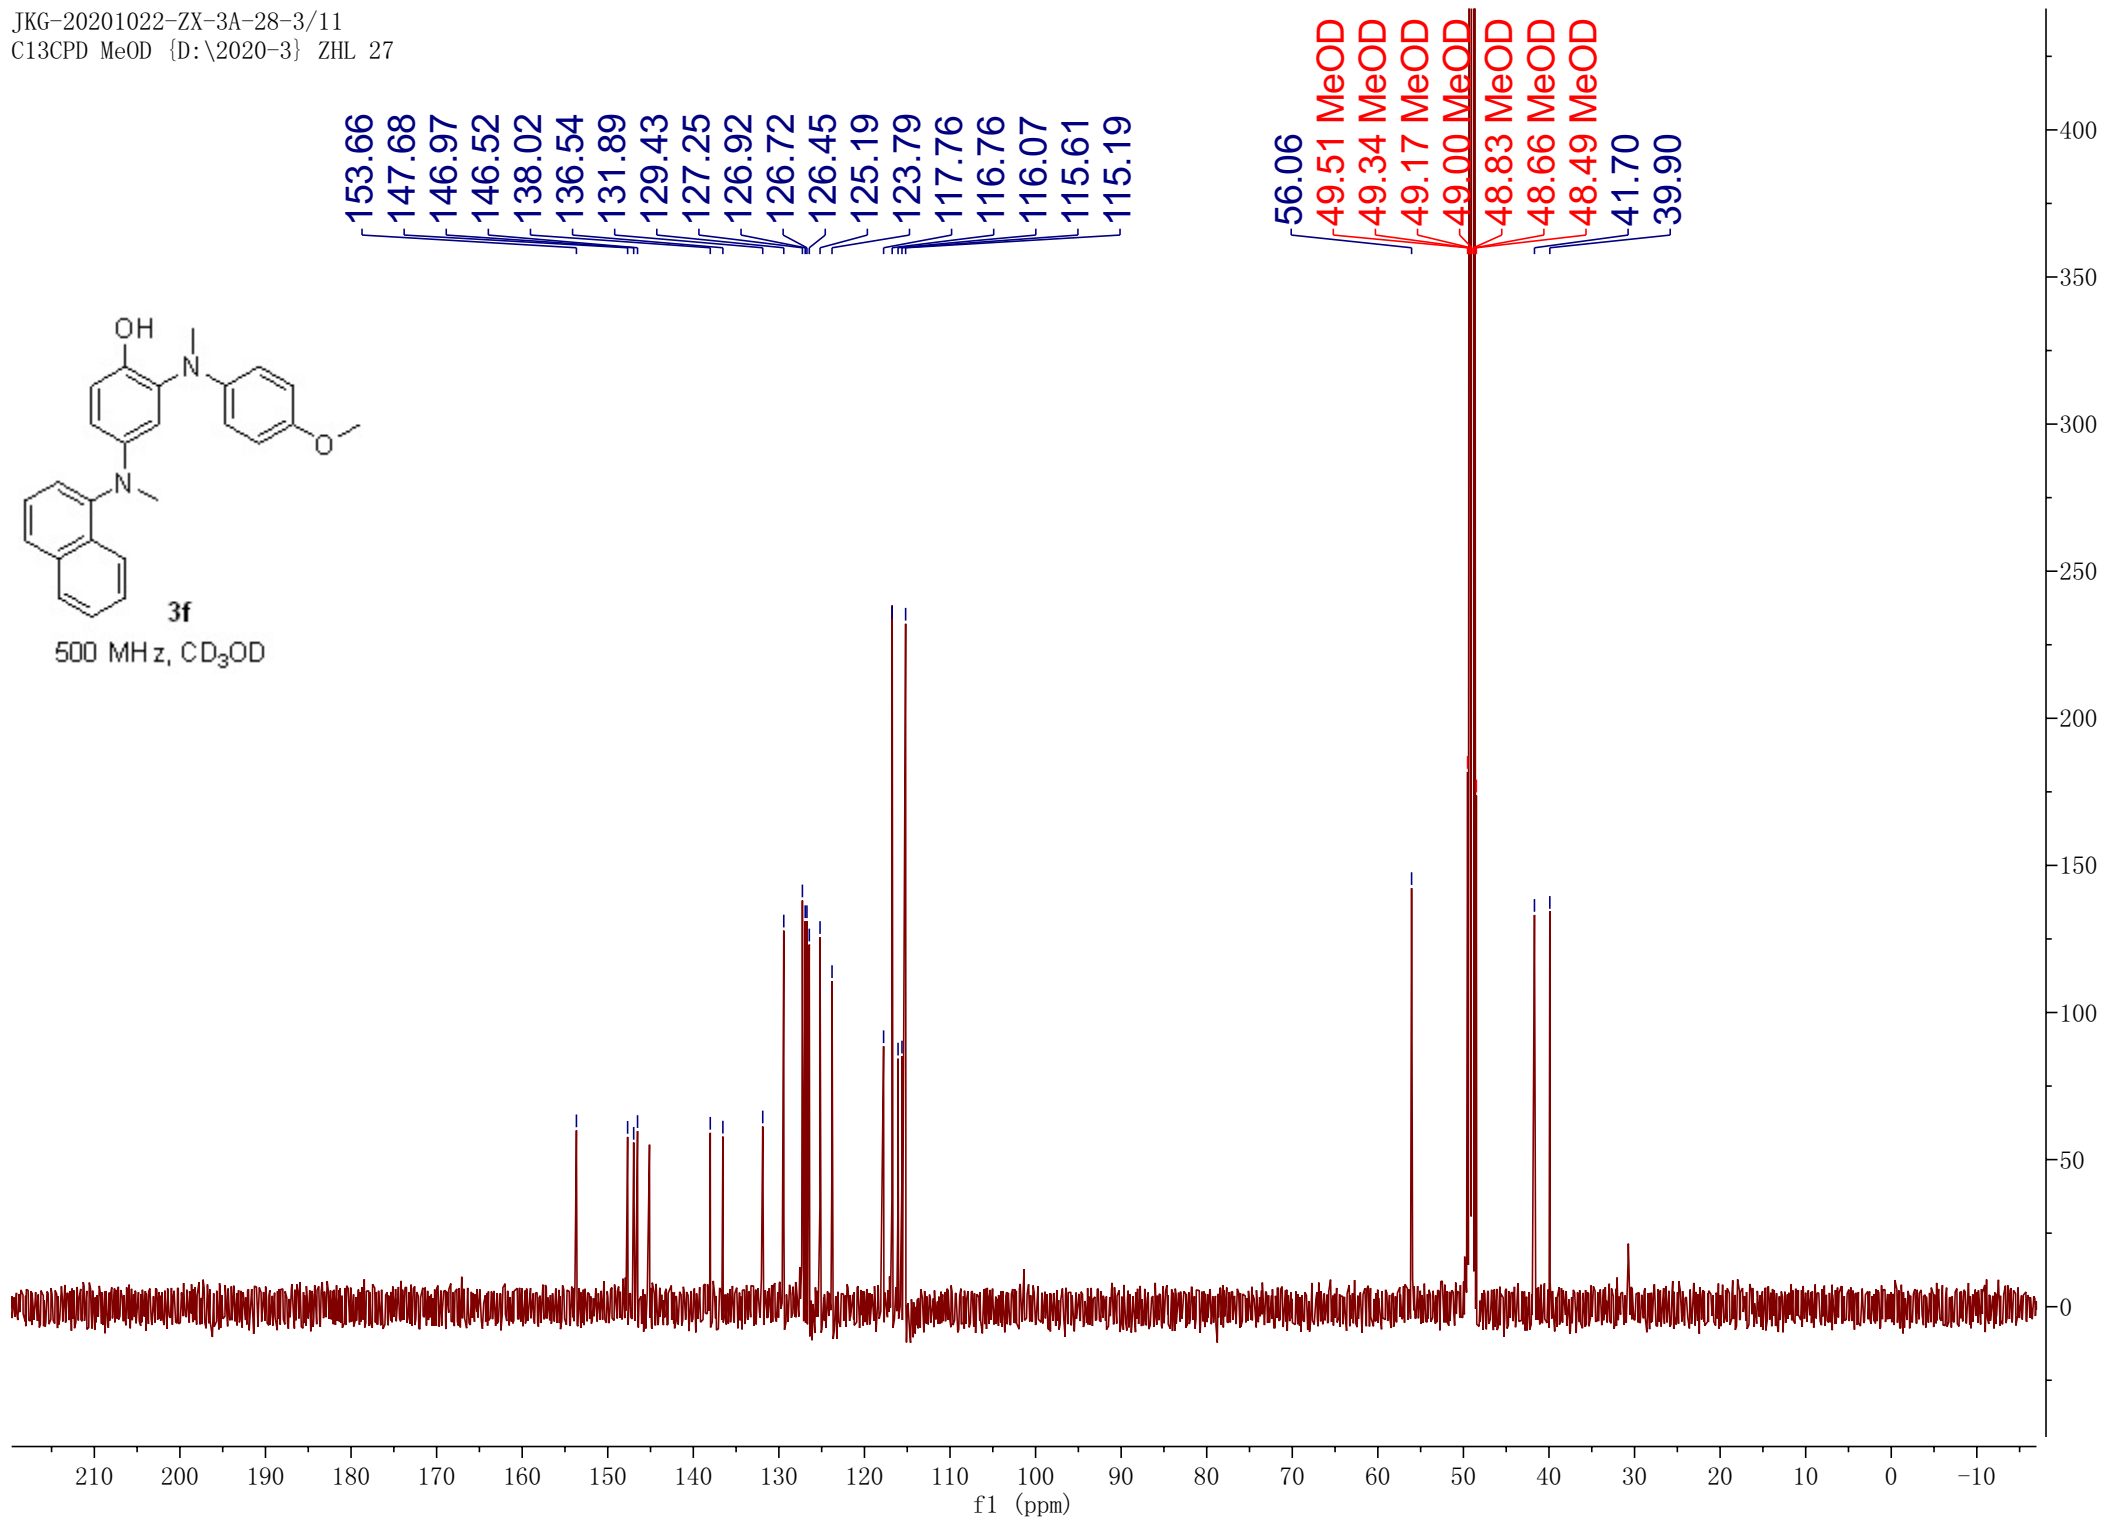

7.26 CDC13  
6.95  
6.93  
6.92  
6.90  
6.83  
6.82  
6.81  
6.80  
6.79  
6.79  
6.72  
6.71  
6.70  
5.84

3.78  
3.76  
3.17  
3.14

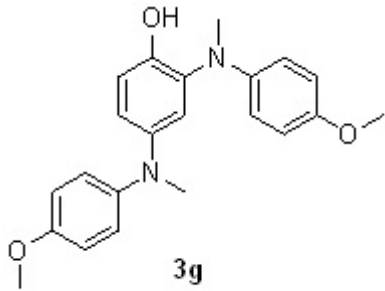

500 MHz, CDCl<sub>3</sub>

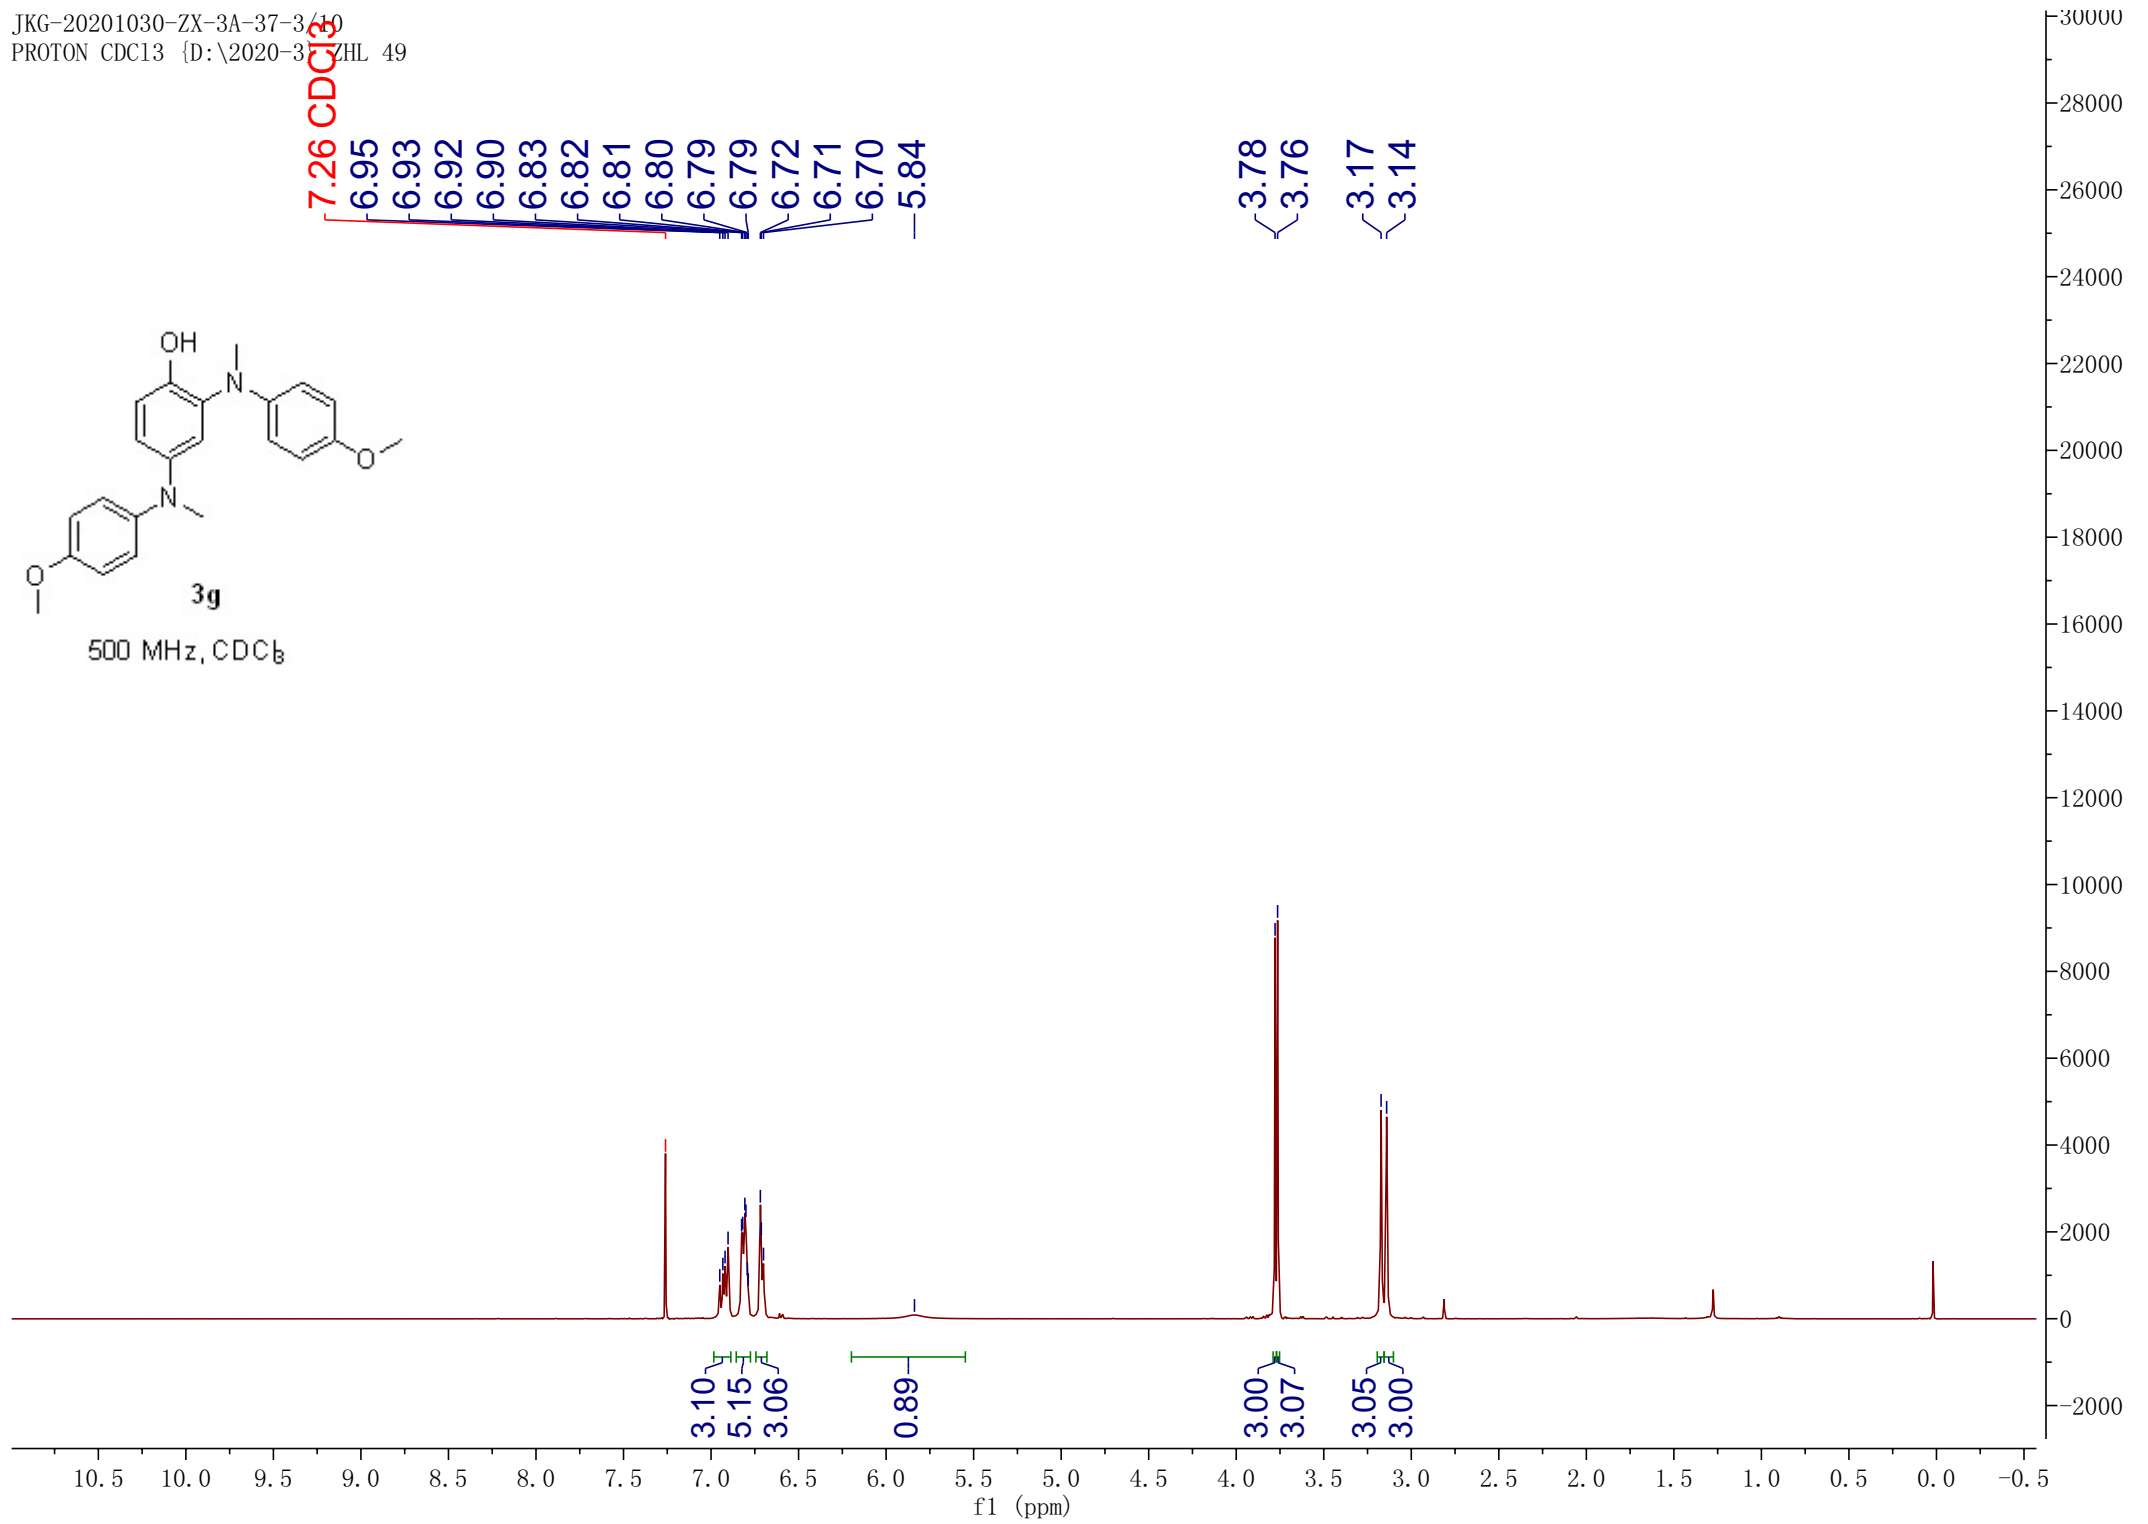

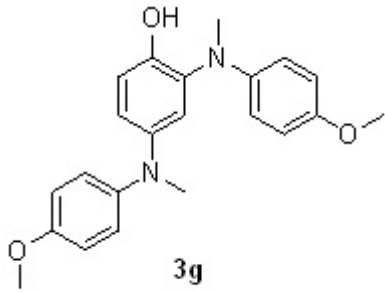

500 MHz, CDCl<sub>3</sub>

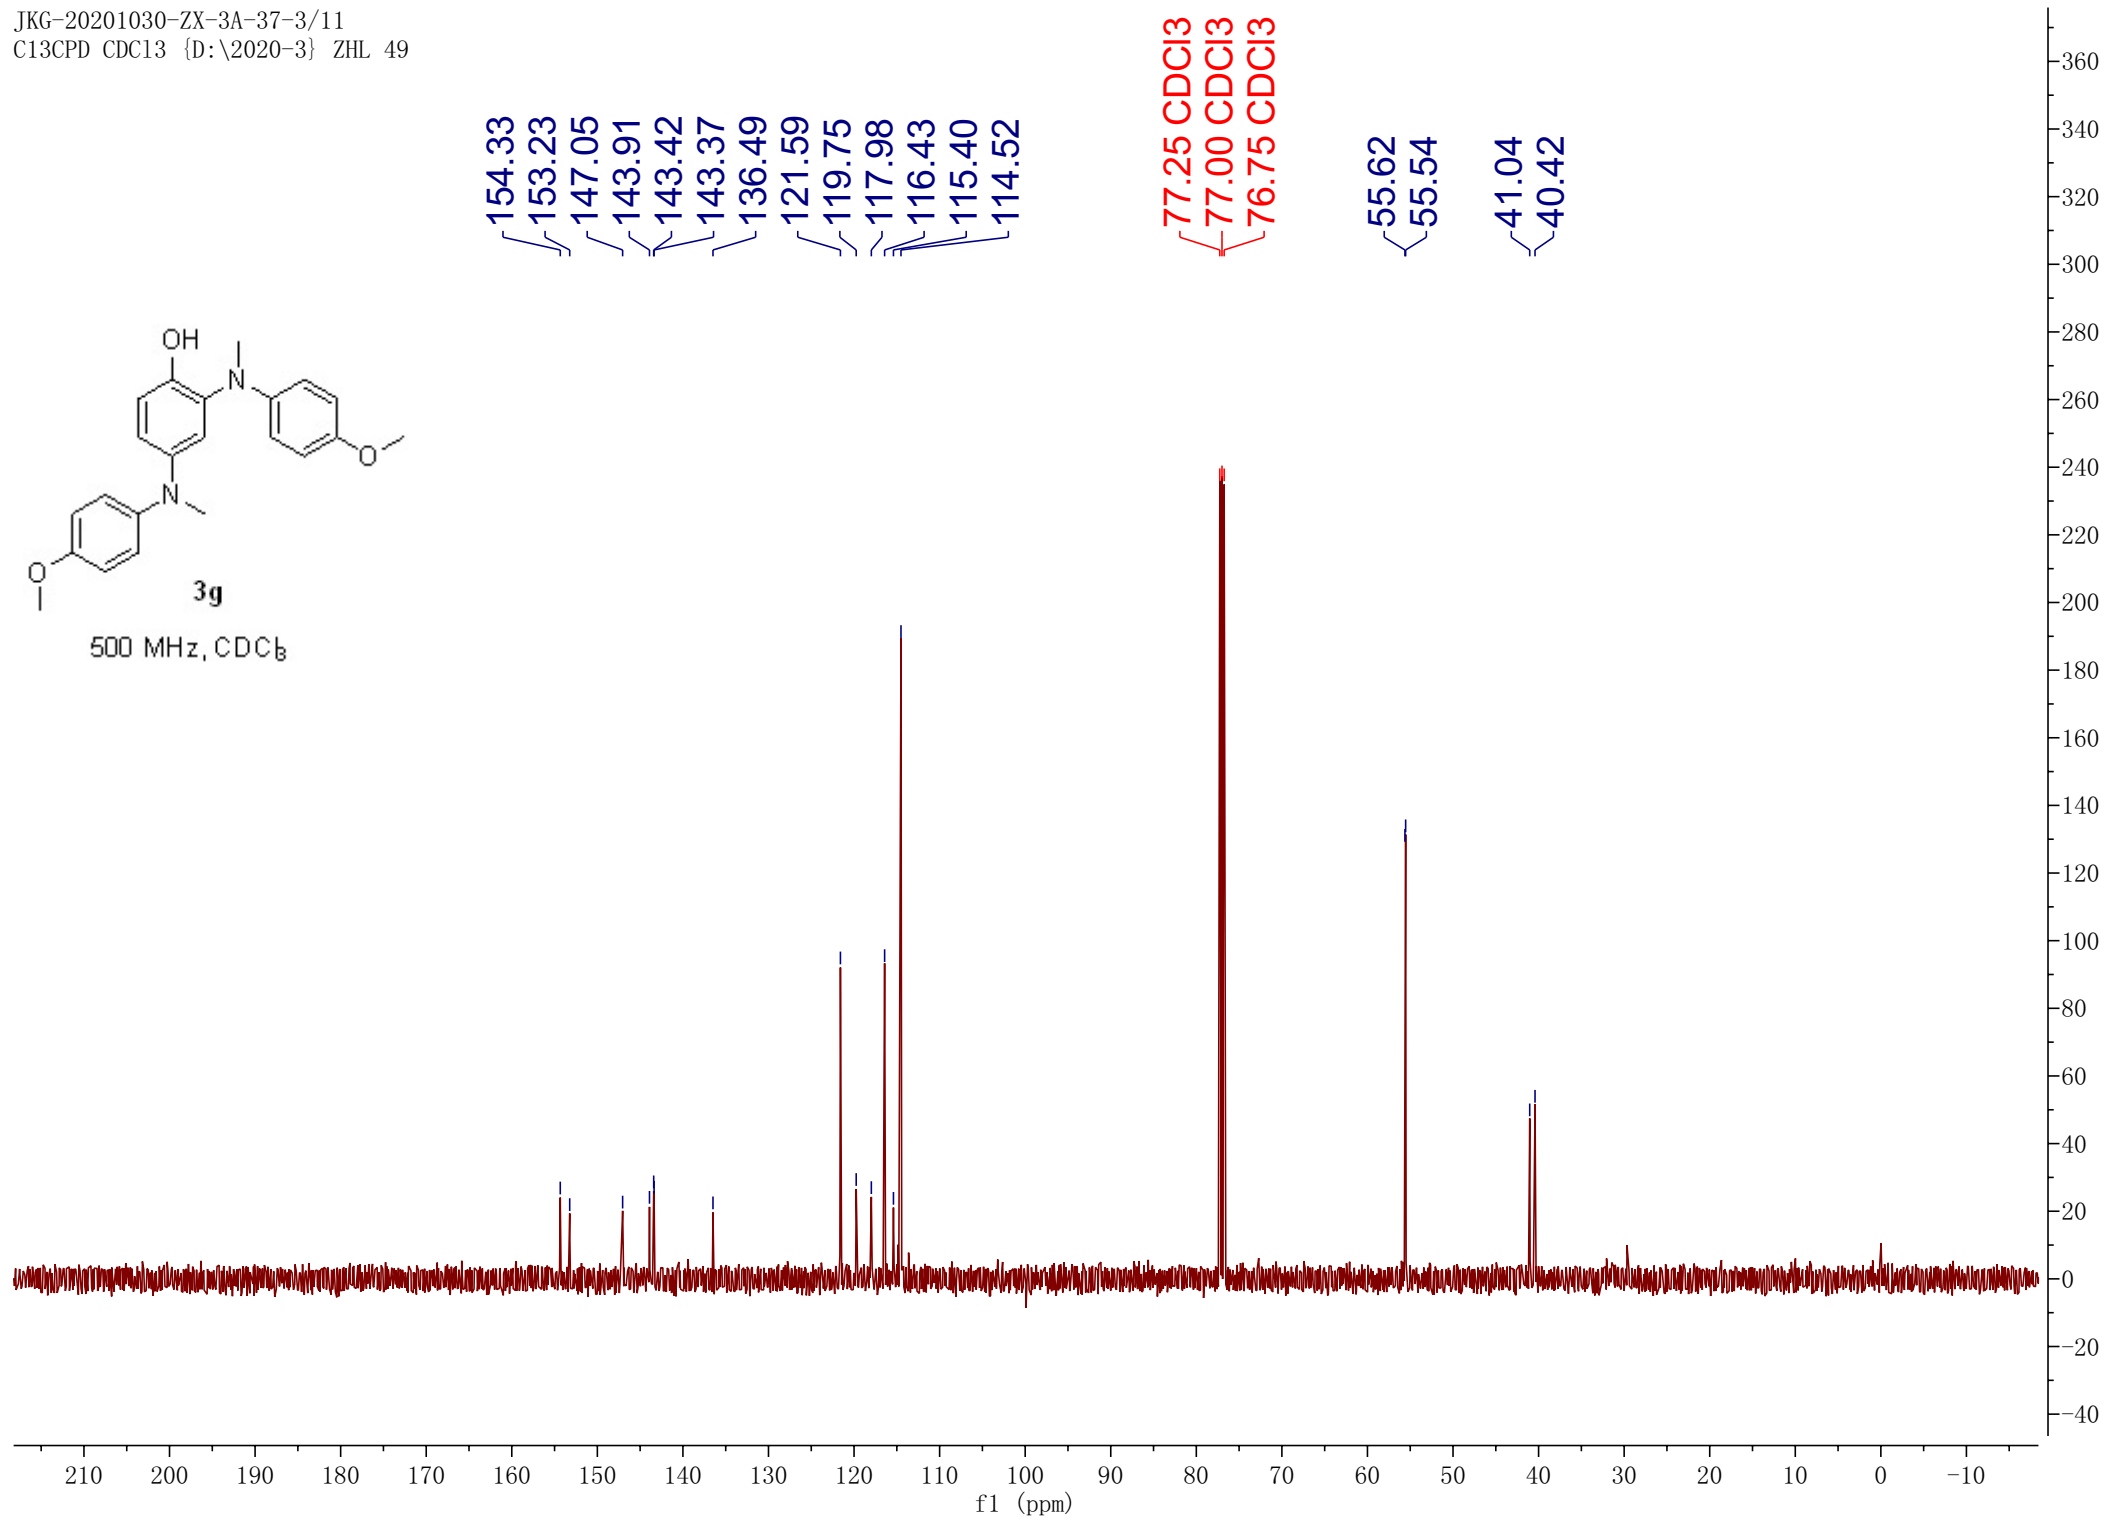

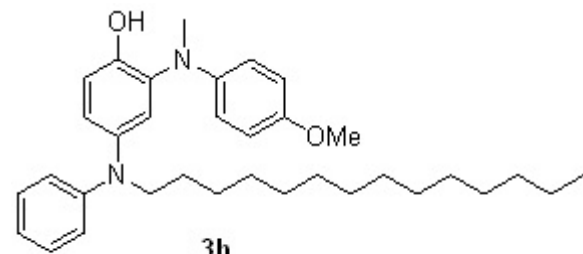

400 MHz, CDCl<sub>3</sub>

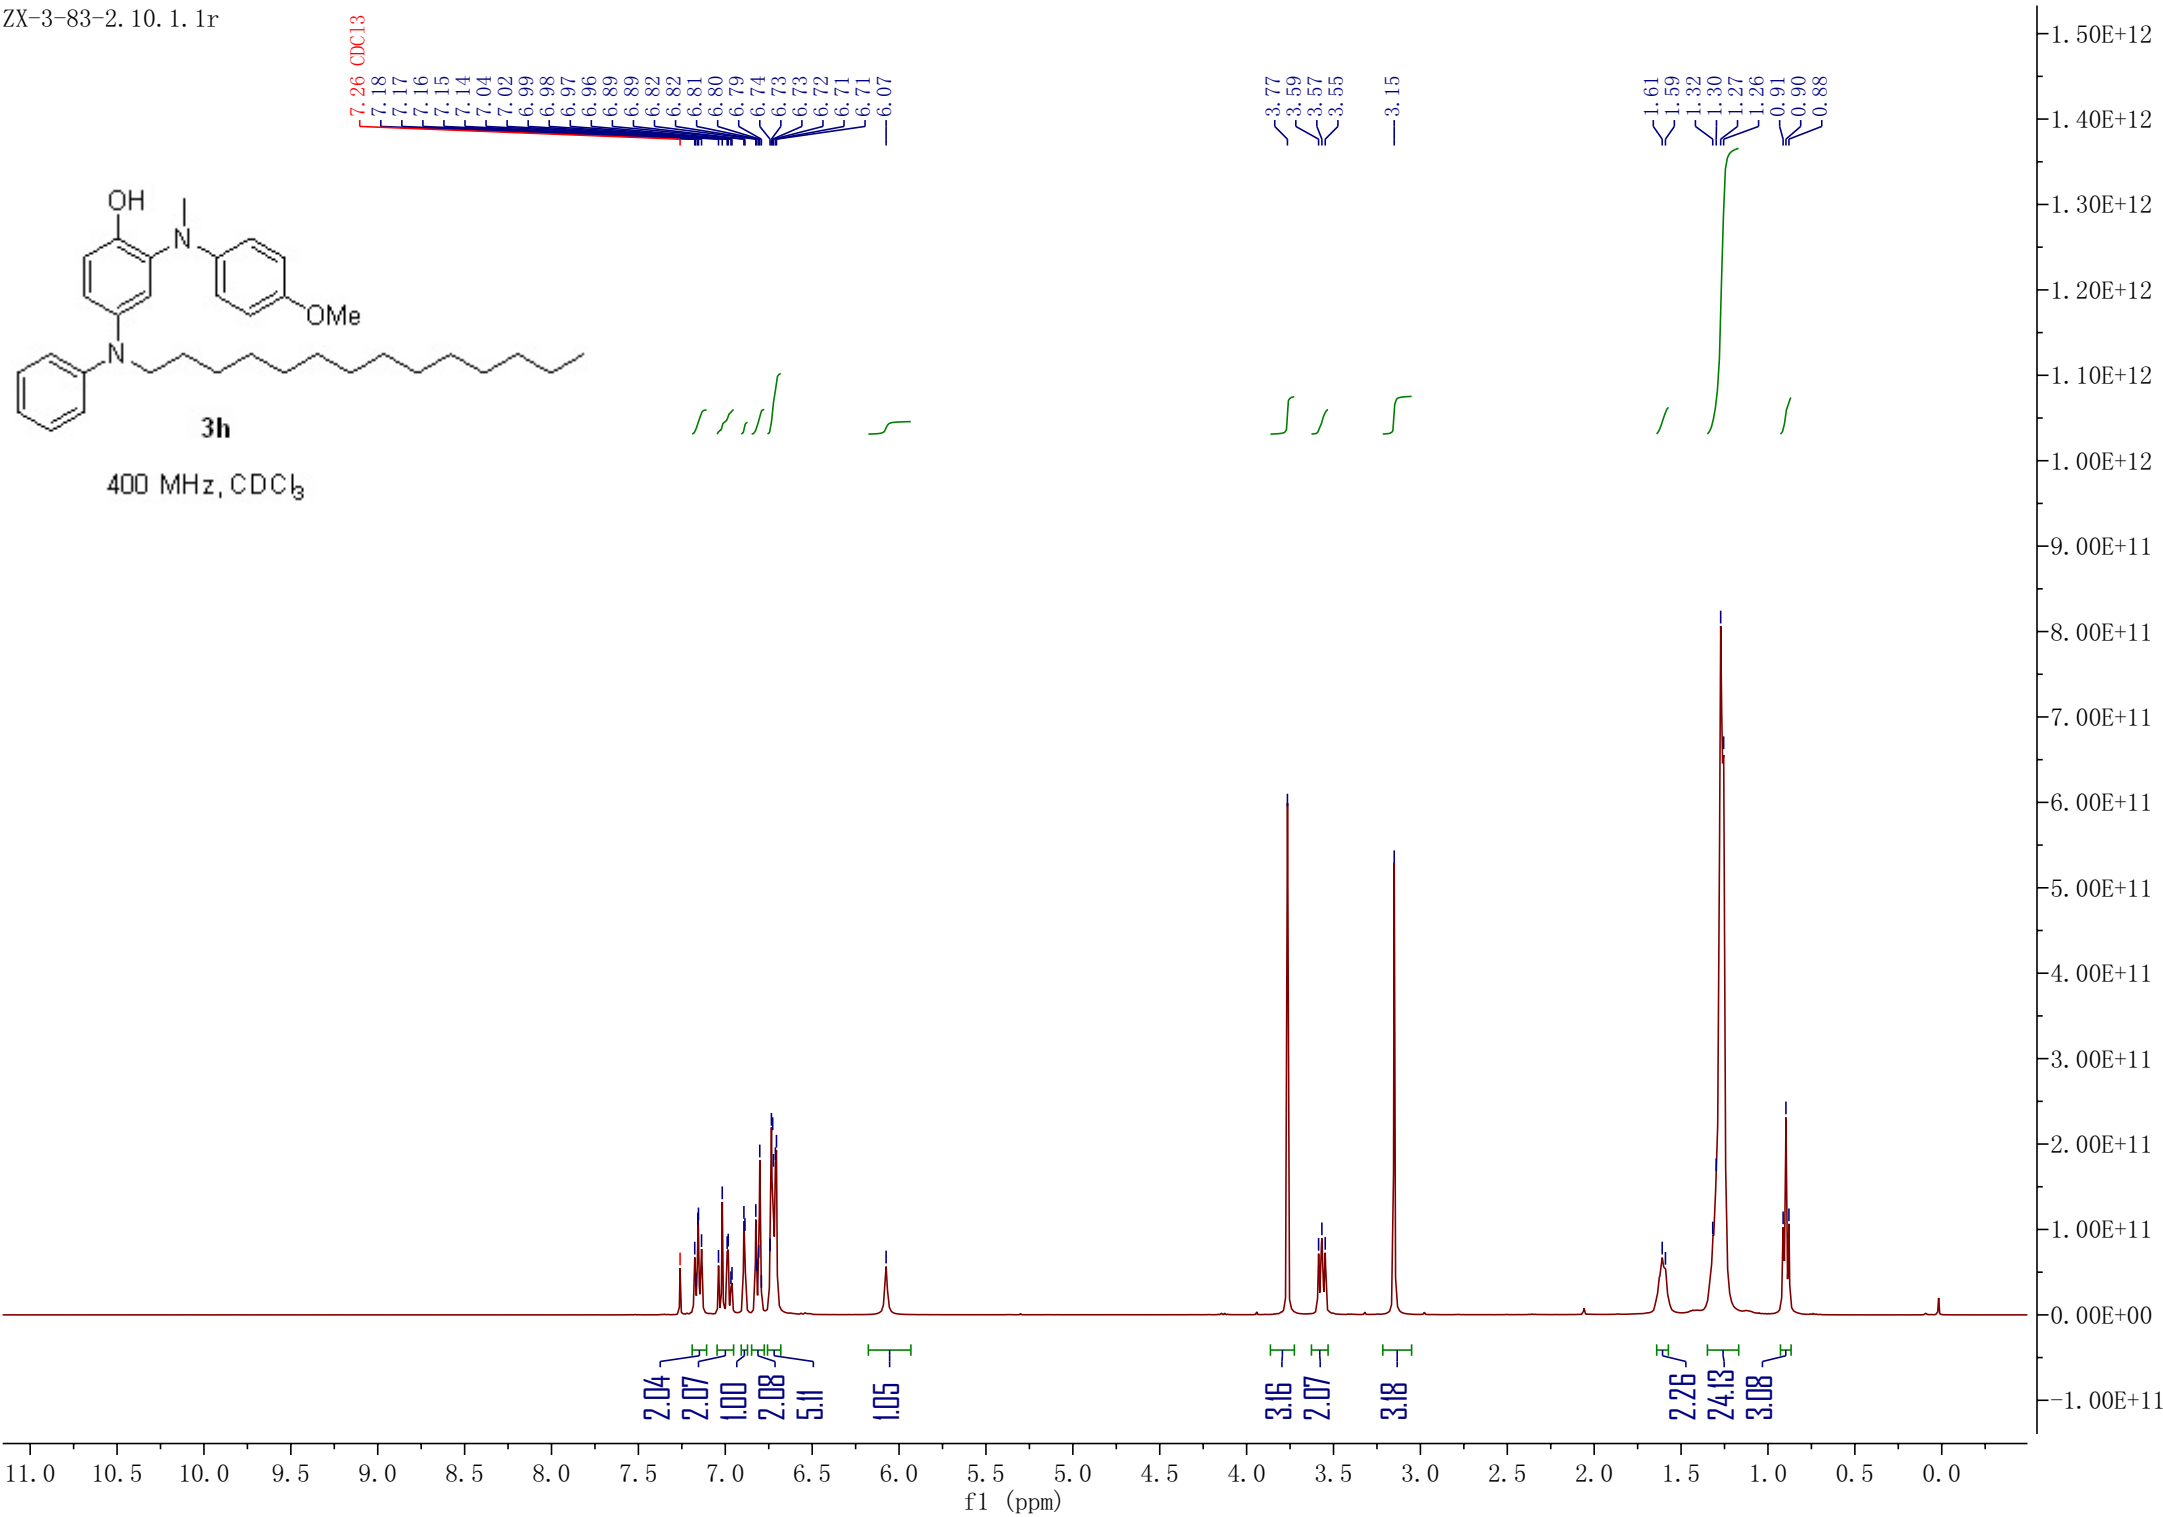

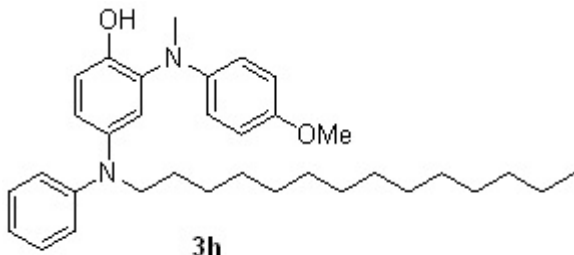

400 MHz, CDCl<sub>3</sub>

153.52  
149.45  
148.91  
143.38  
141.03  
137.16  
128.97  
125.73  
124.29  
117.75  
116.76  
115.87  
115.37  
114.60

77.37 CDCl<sub>3</sub>  
77.06 CDCl<sub>3</sub>  
76.74 CDCl<sub>3</sub>

55.66  
52.45  
52.44

40.64  
31.96  
29.73  
29.72  
29.70  
29.67  
29.64  
29.49  
29.40  
27.42  
27.10  
22.73  
14.17

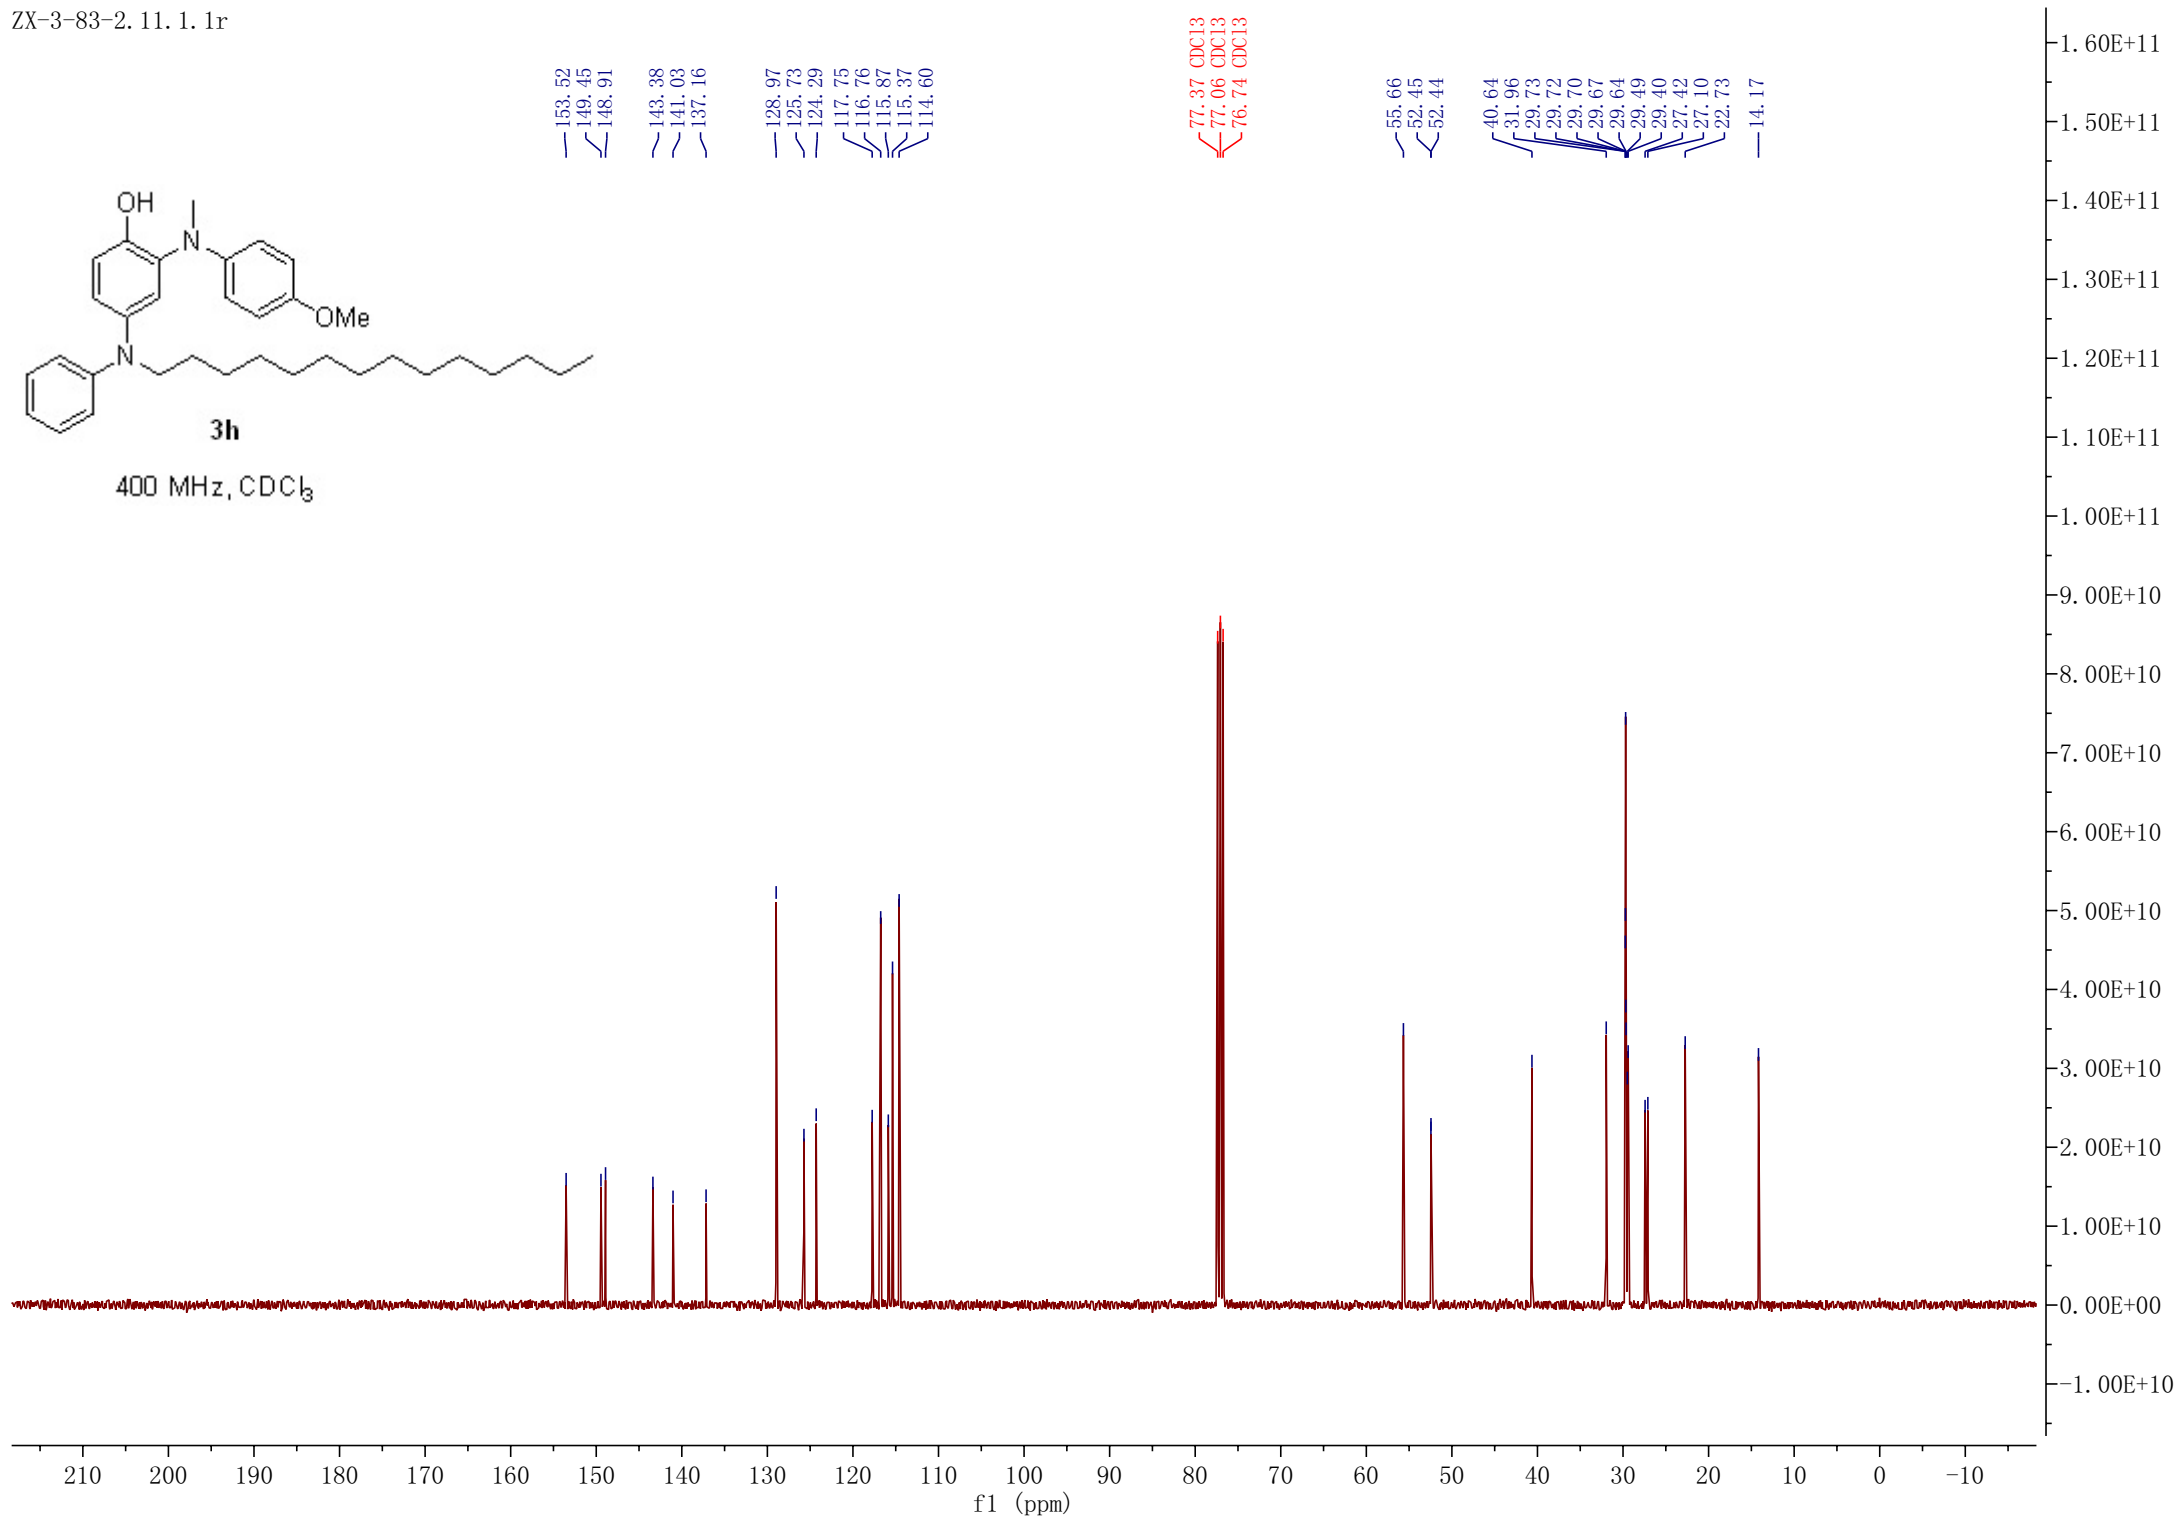

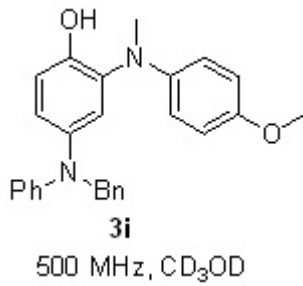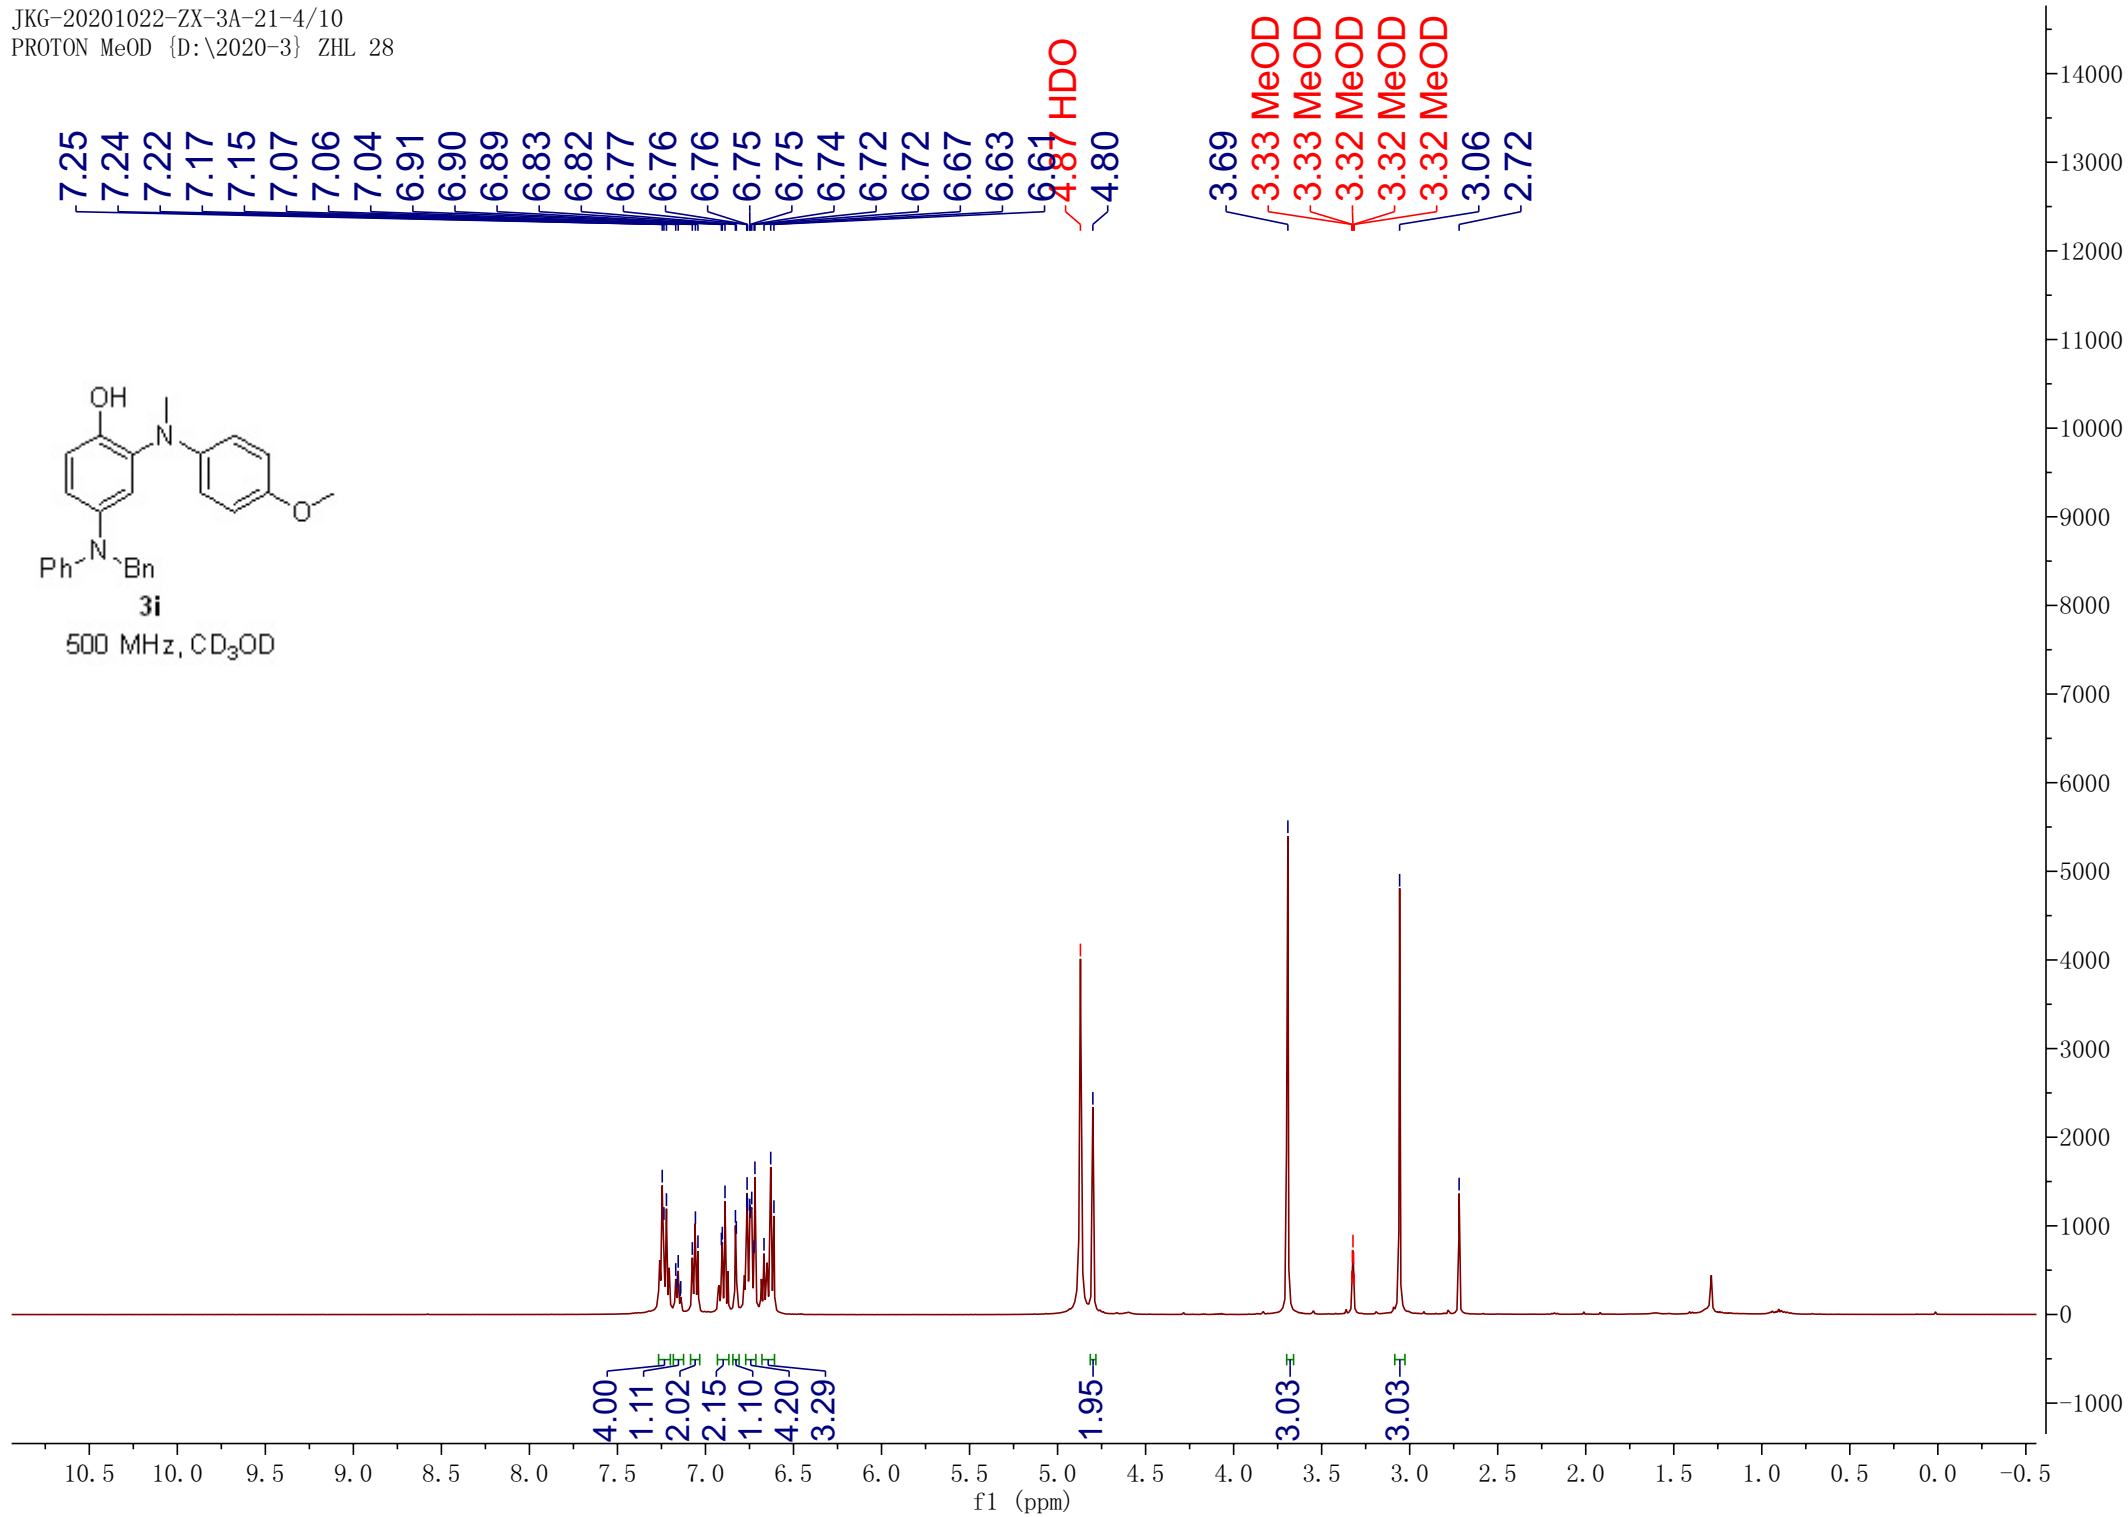

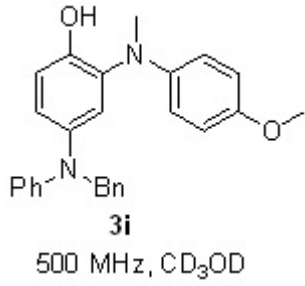

154.03  
151.20  
150.38  
145.19  
142.02  
140.67  
138.75  
129.80  
129.38  
128.03  
127.70  
125.77  
124.86  
119.44  
118.11  
117.24  
117.21  
115.75  
115.52  
115.34

57.39  
56.07  
49.51 MeOD  
49.34 MeOD  
49.17 MeOD  
49.00 MeOD  
48.83 MeOD  
48.66 MeOD  
48.49 MeOD  
40.04

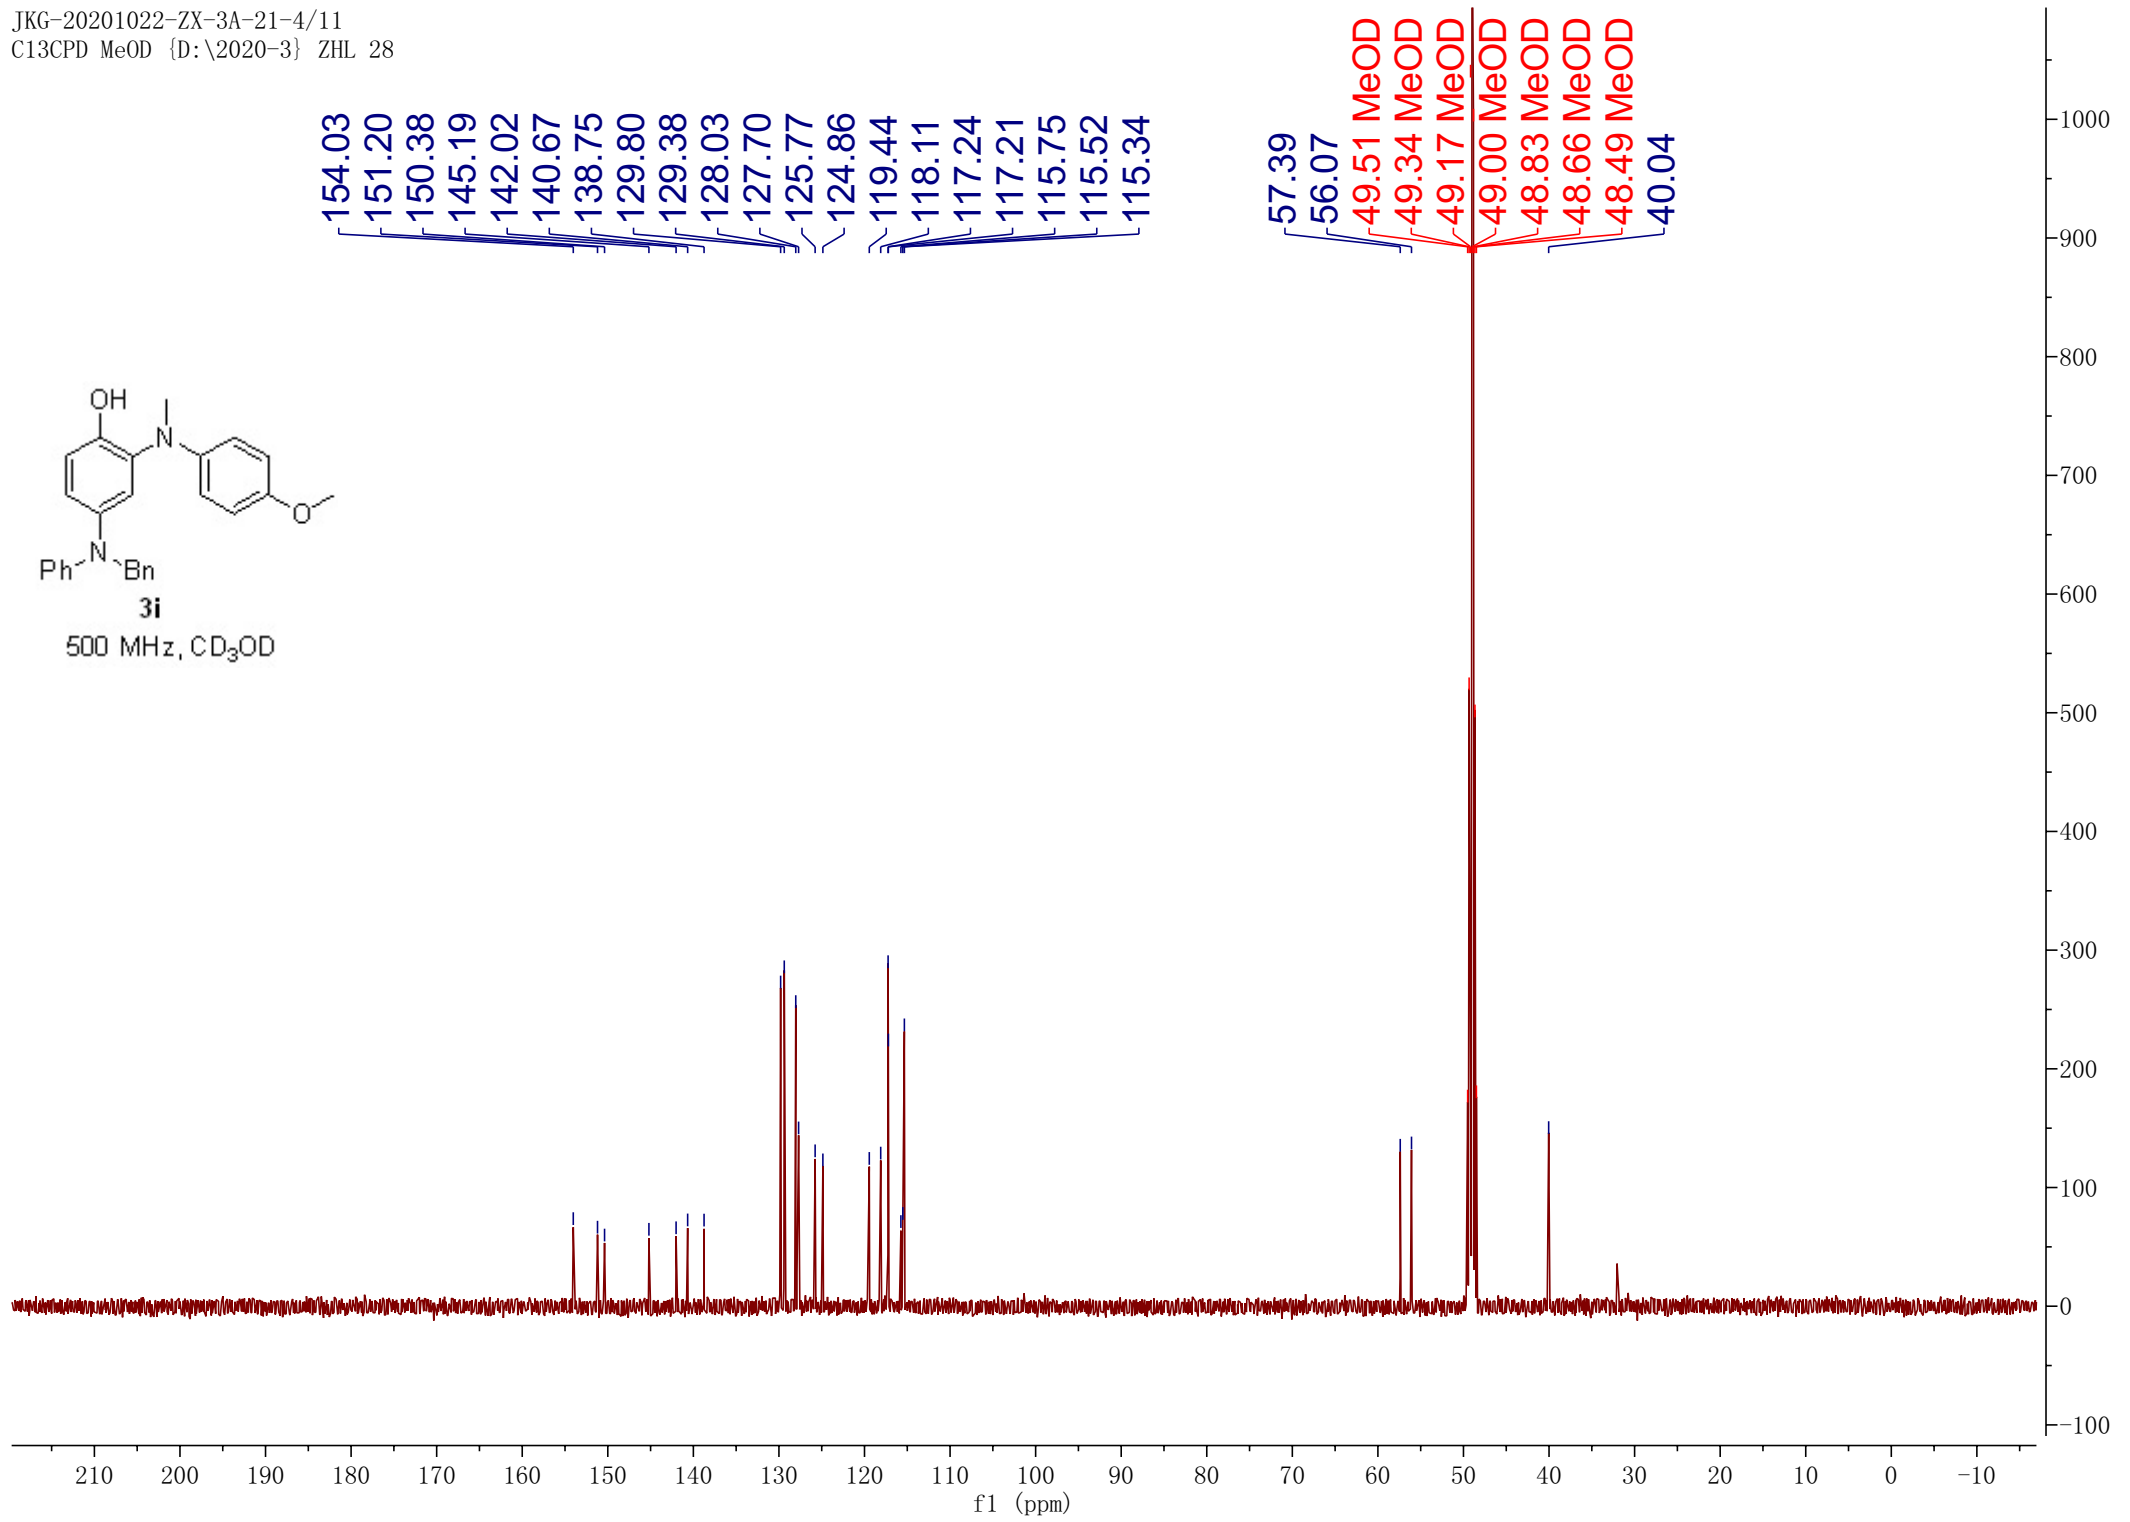



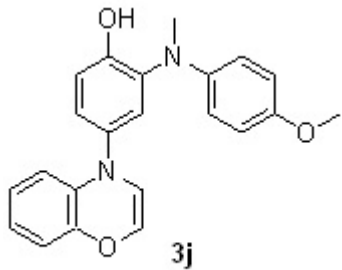

500 MHz, CDC<sub>13</sub>

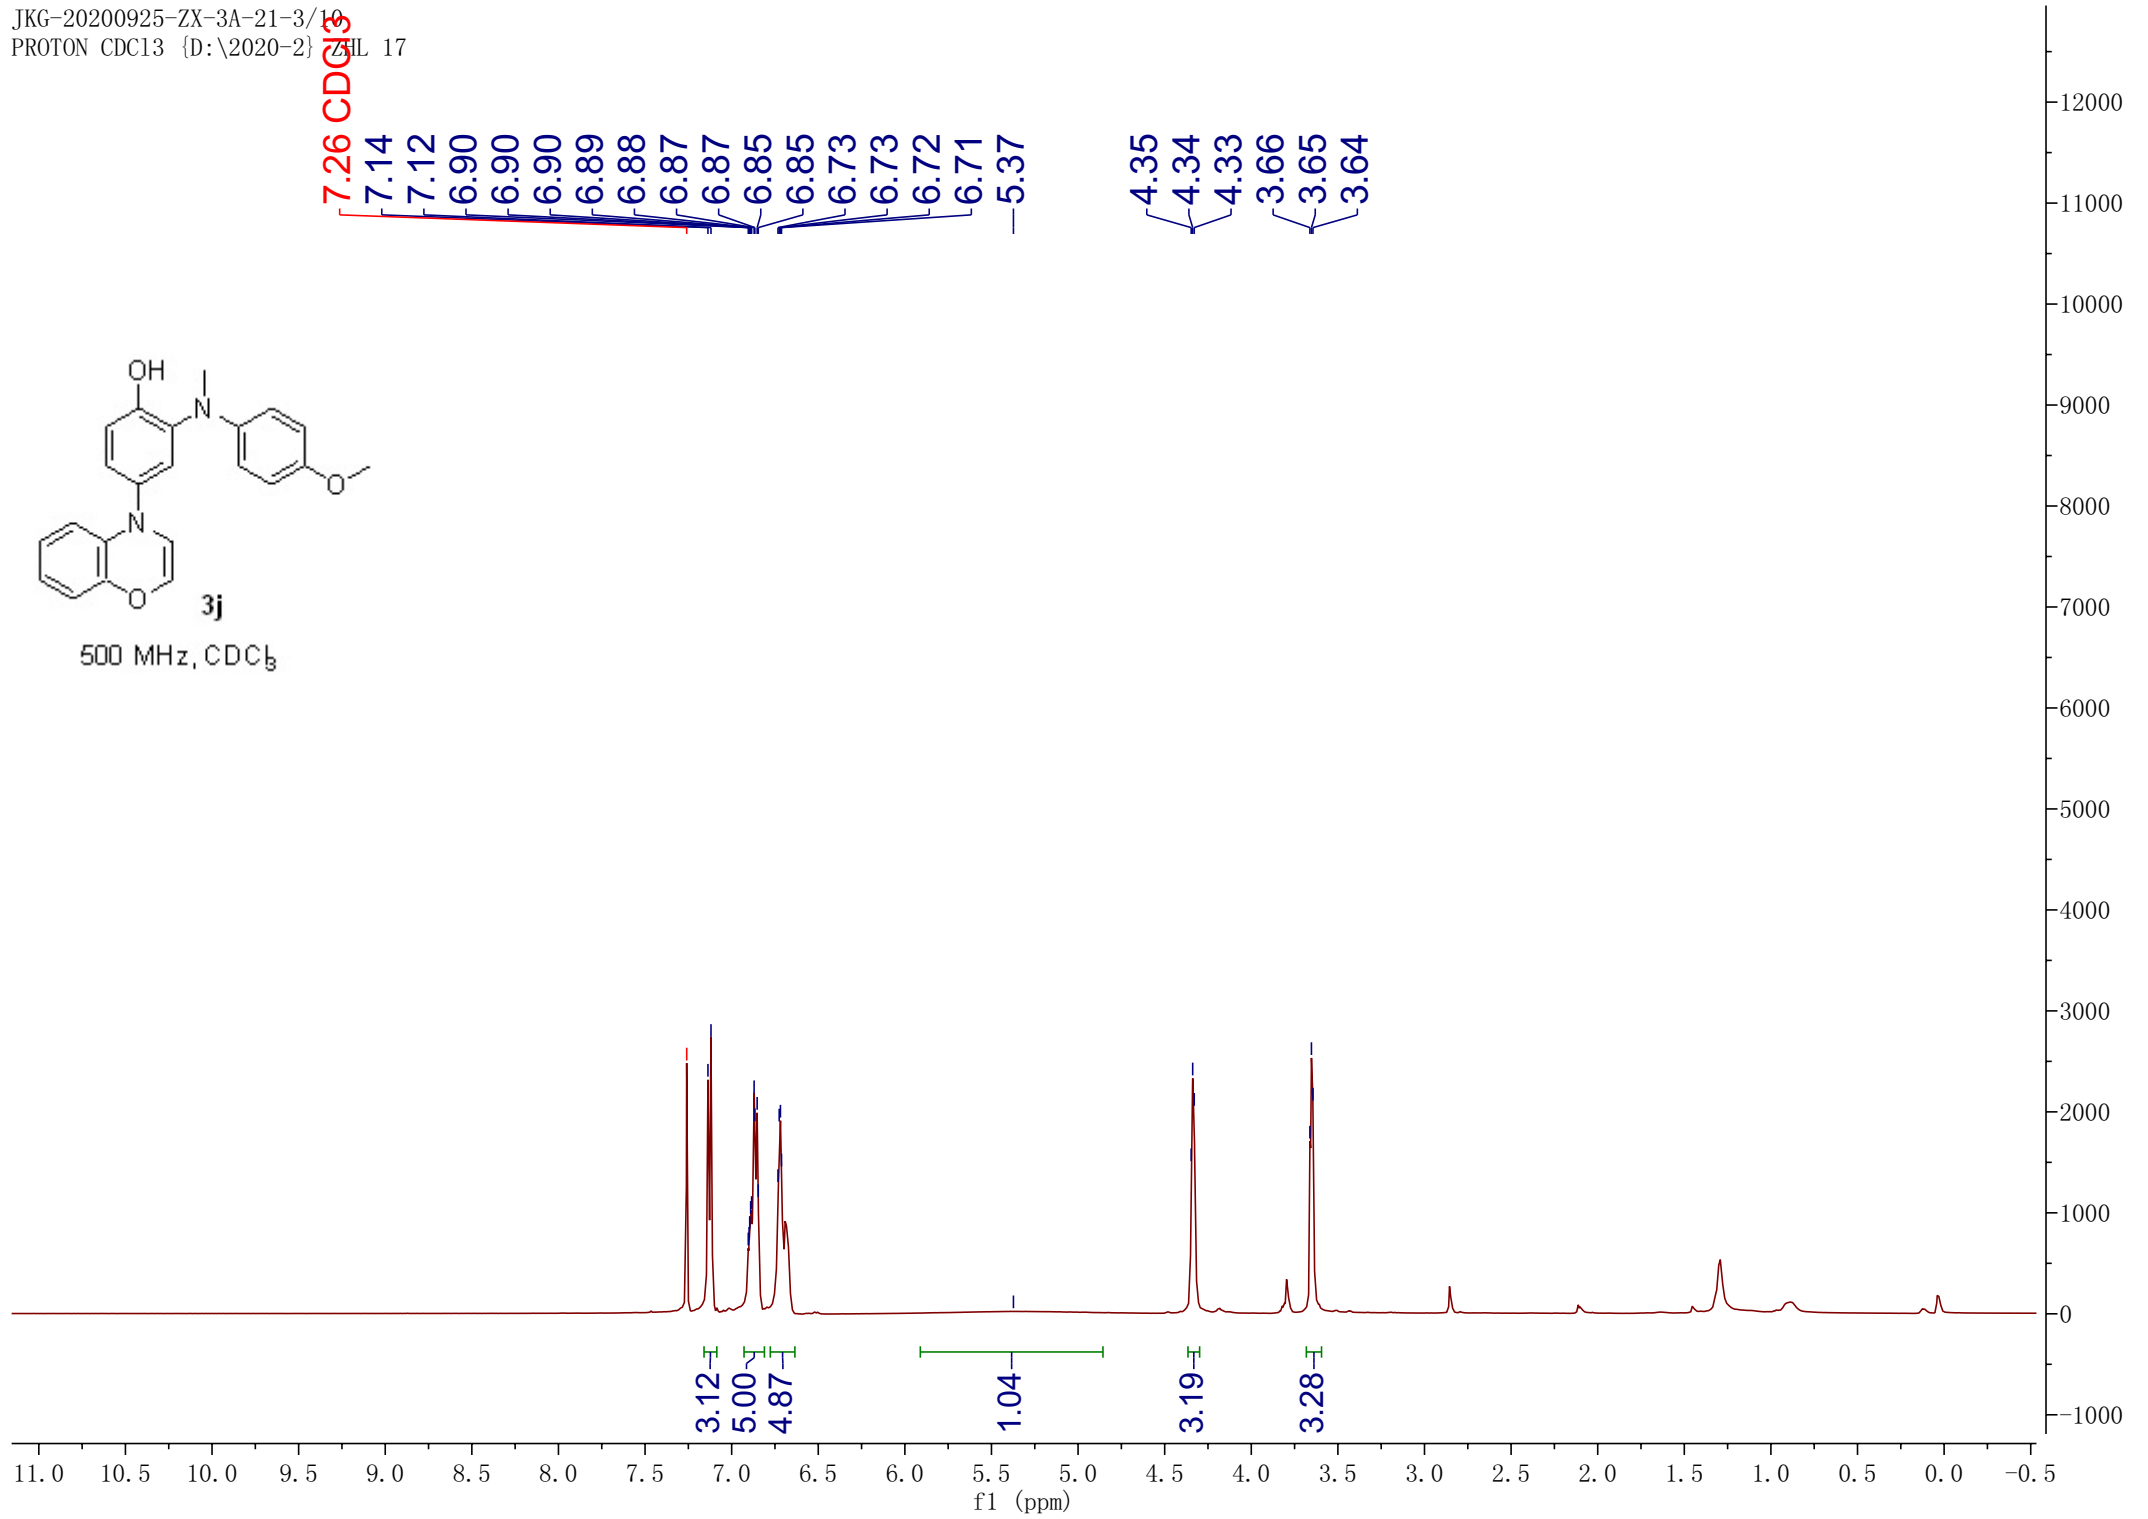

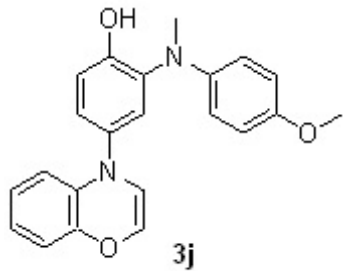

500 MHz, CDCl<sub>3</sub>

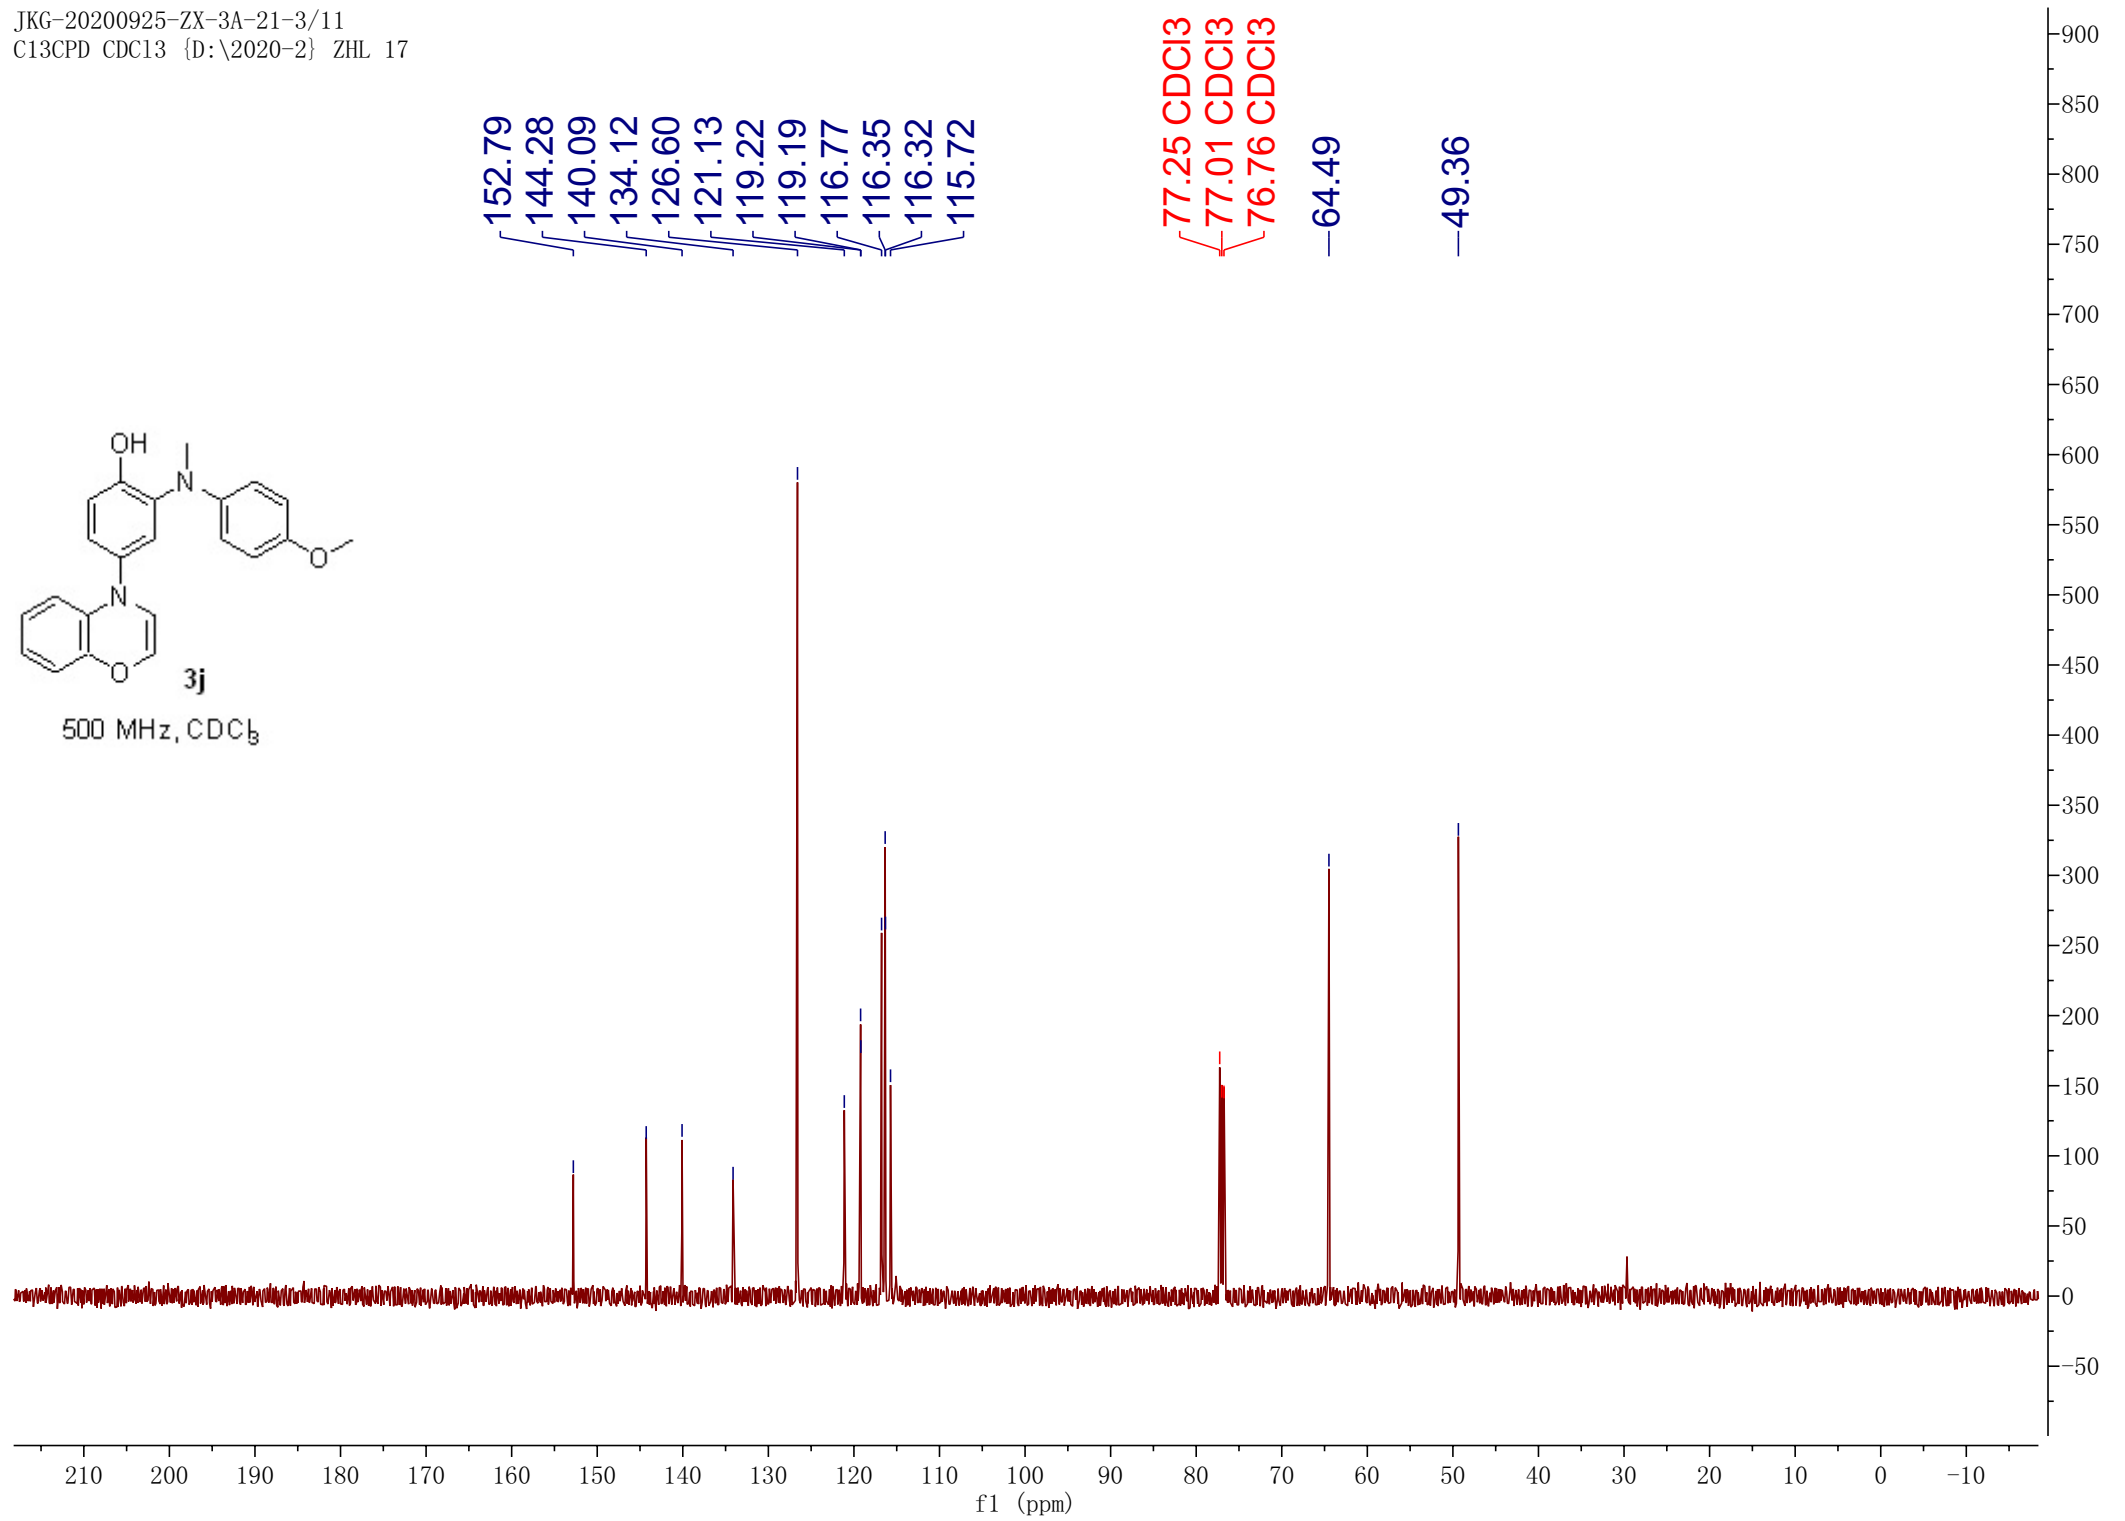

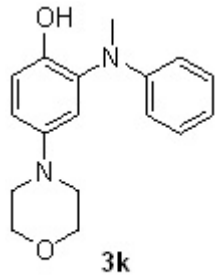

500 MHz, CDCl<sub>3</sub>

7.26 CDCl<sub>3</sub>  
7.24  
7.23  
7.21  
7.00  
6.98  
6.86  
6.84  
6.84  
6.83  
6.82  
6.81  
6.73  
6.71  
6.68  
6.67  
-5.71

3.83  
3.82  
3.81  
3.20  
3.02  
3.01  
3.00

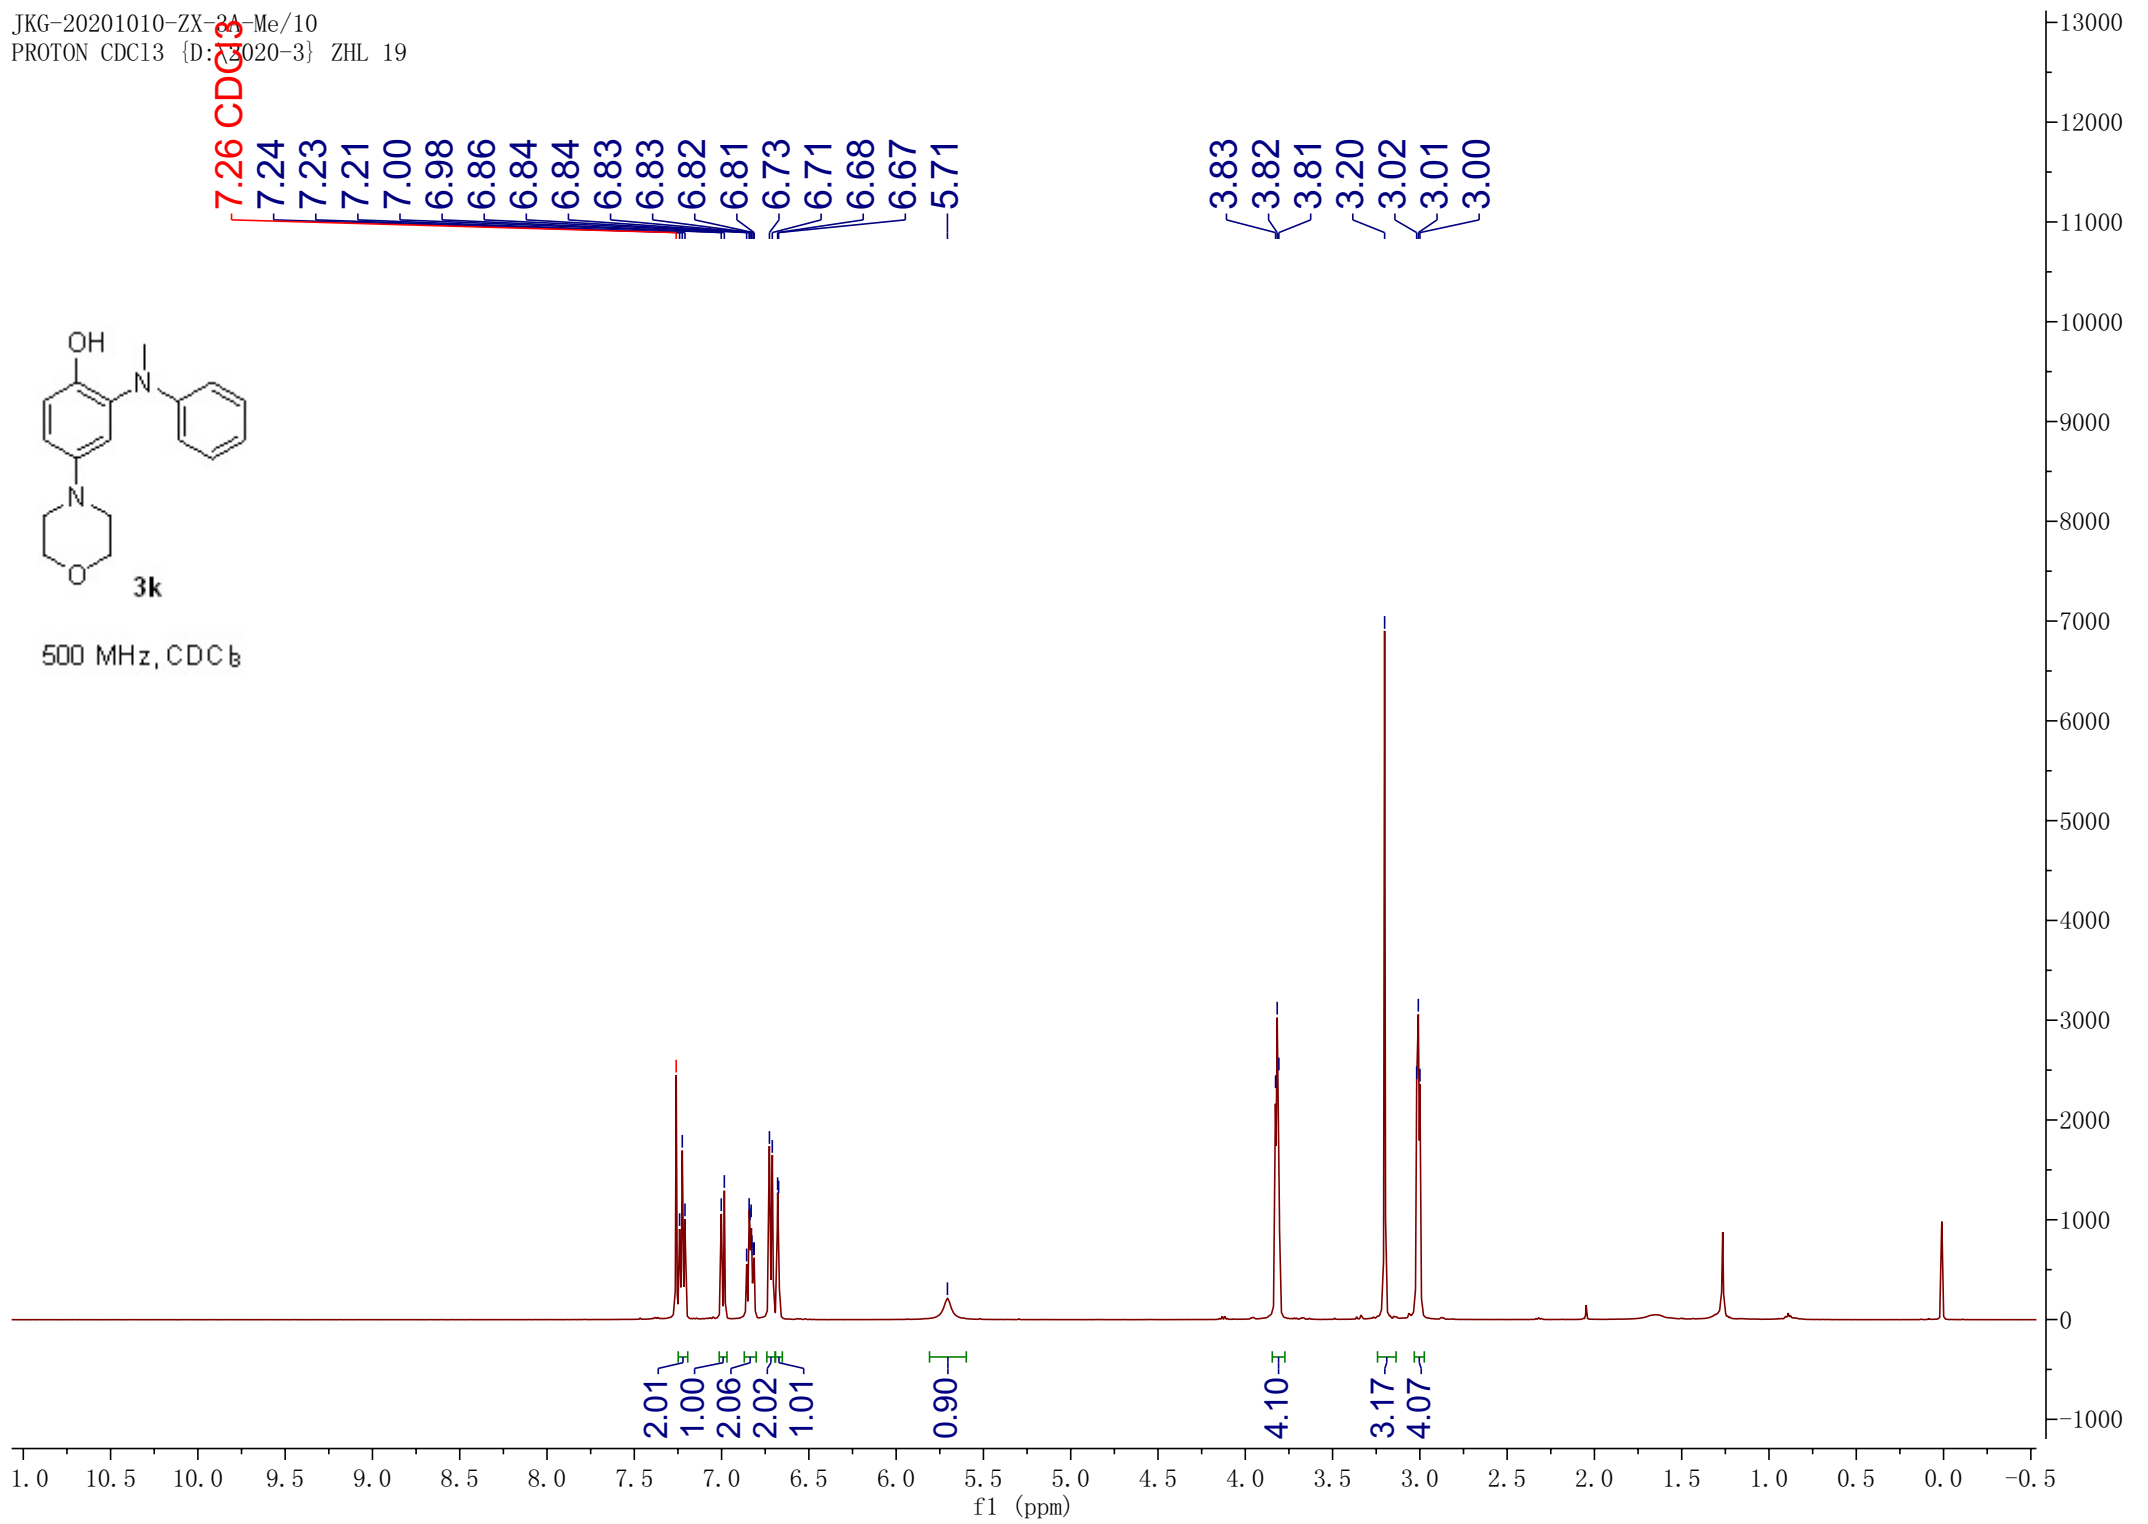

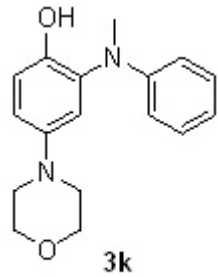

500 MHz, CDCl<sub>3</sub>

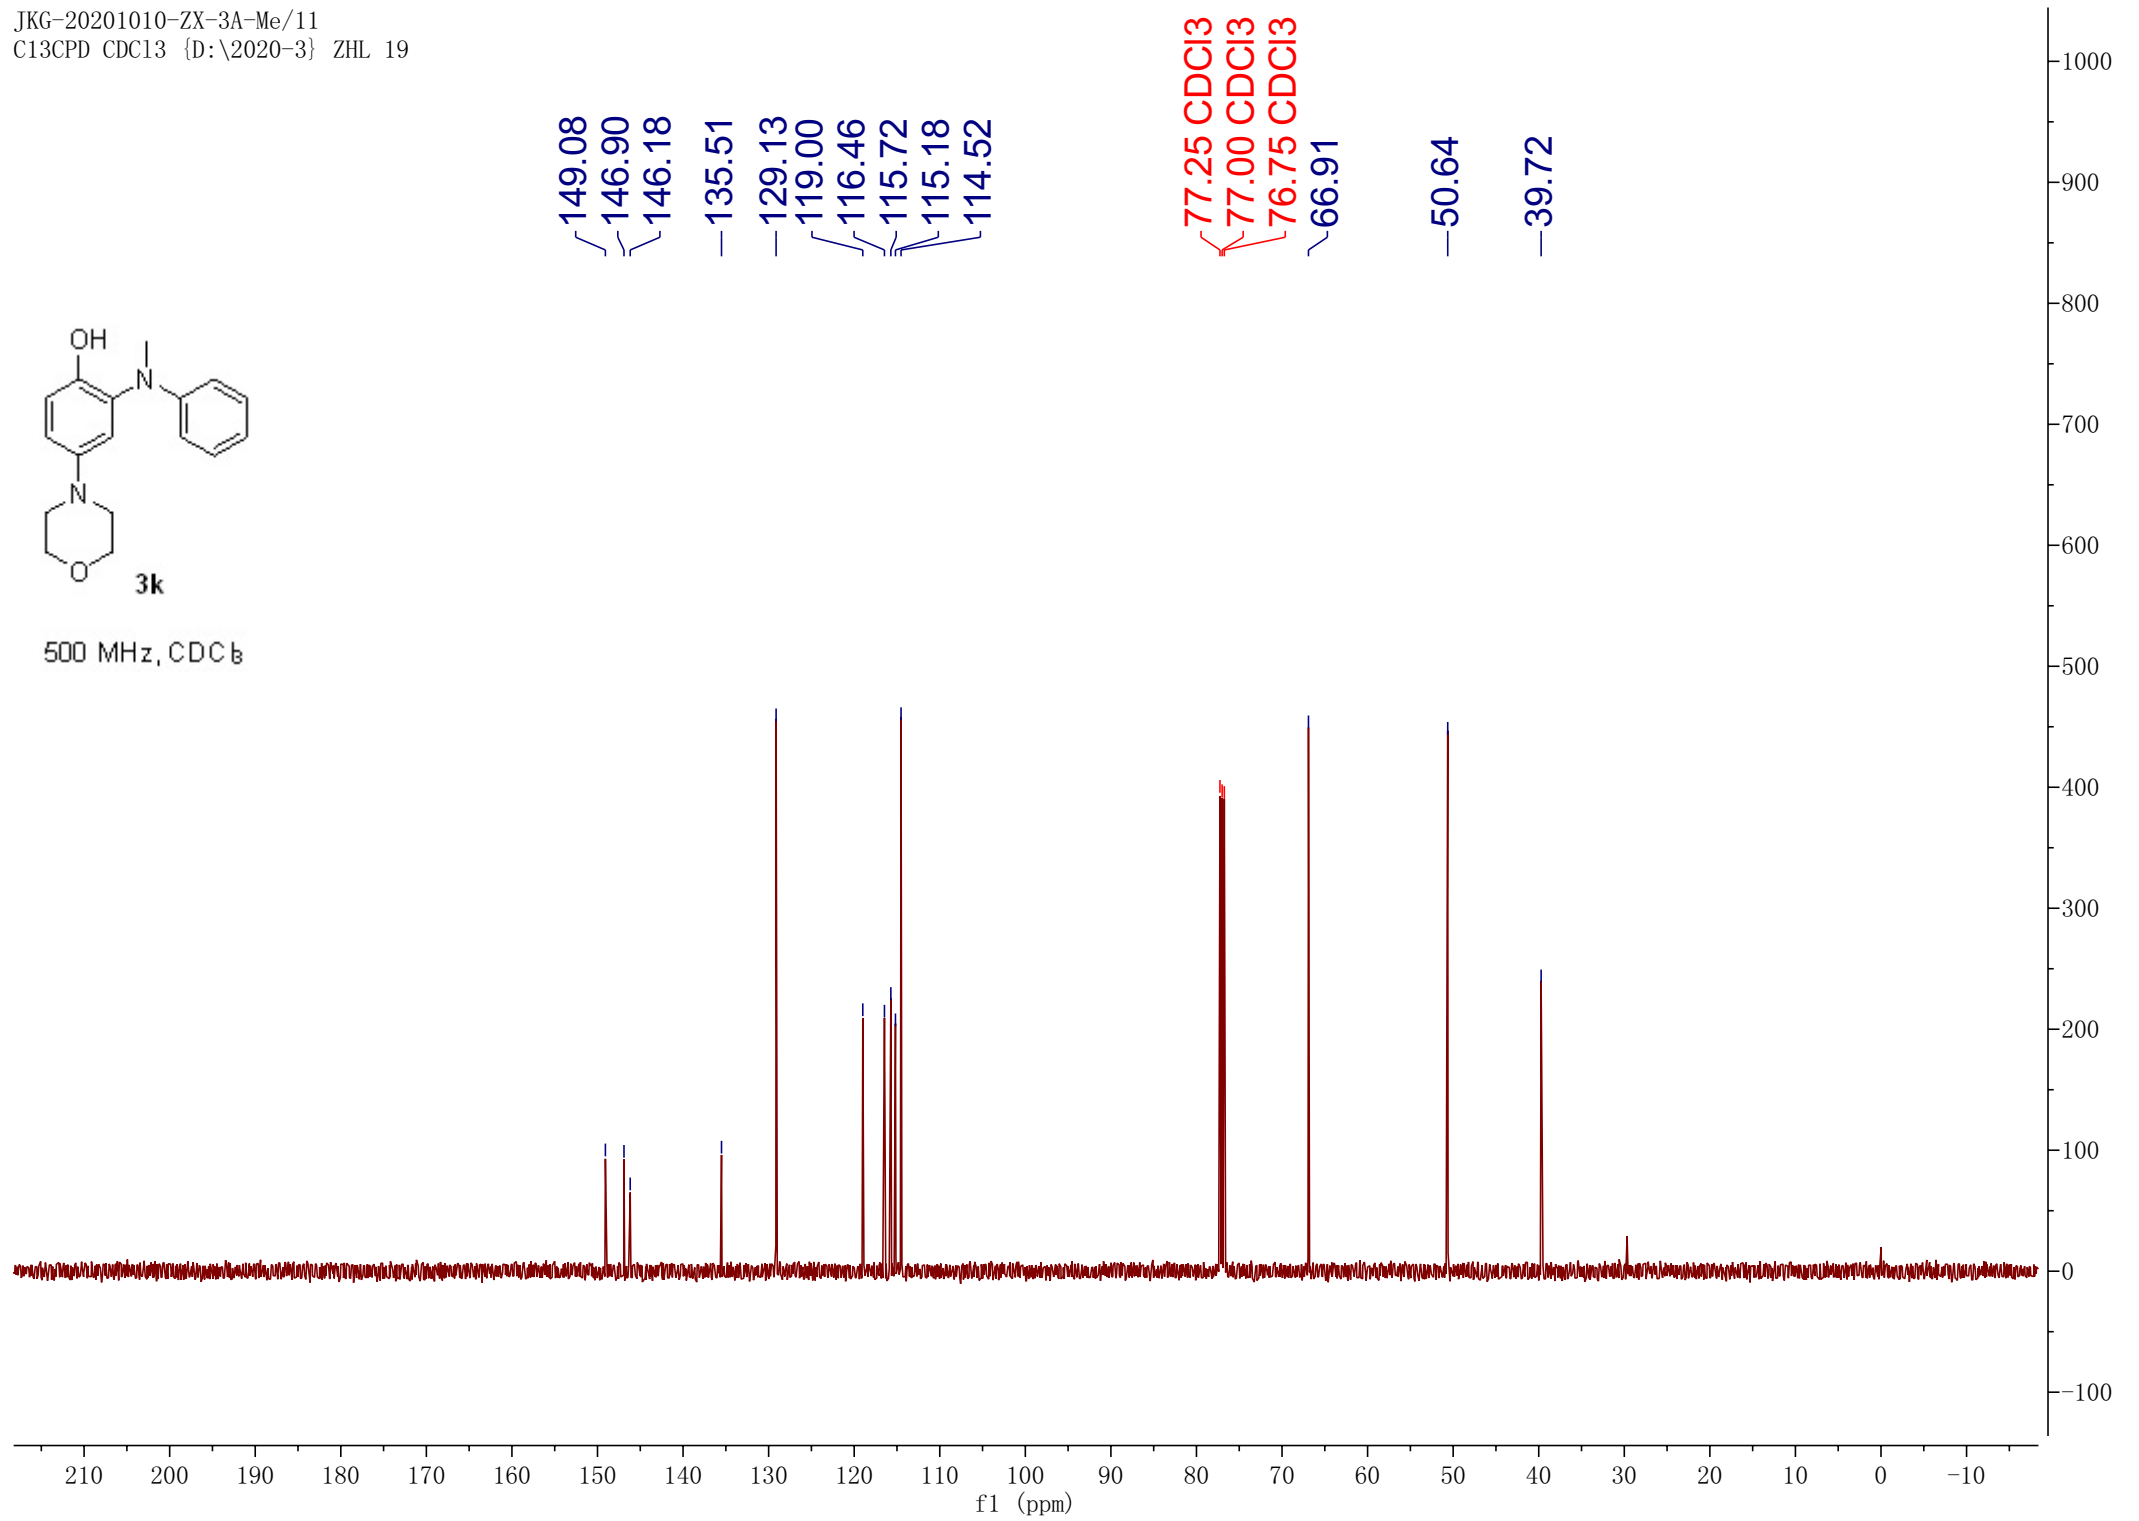

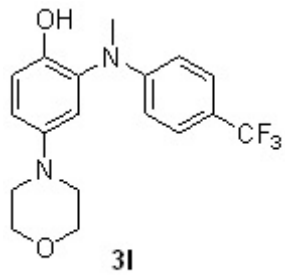

500 MHz, CD<sub>3</sub>OD

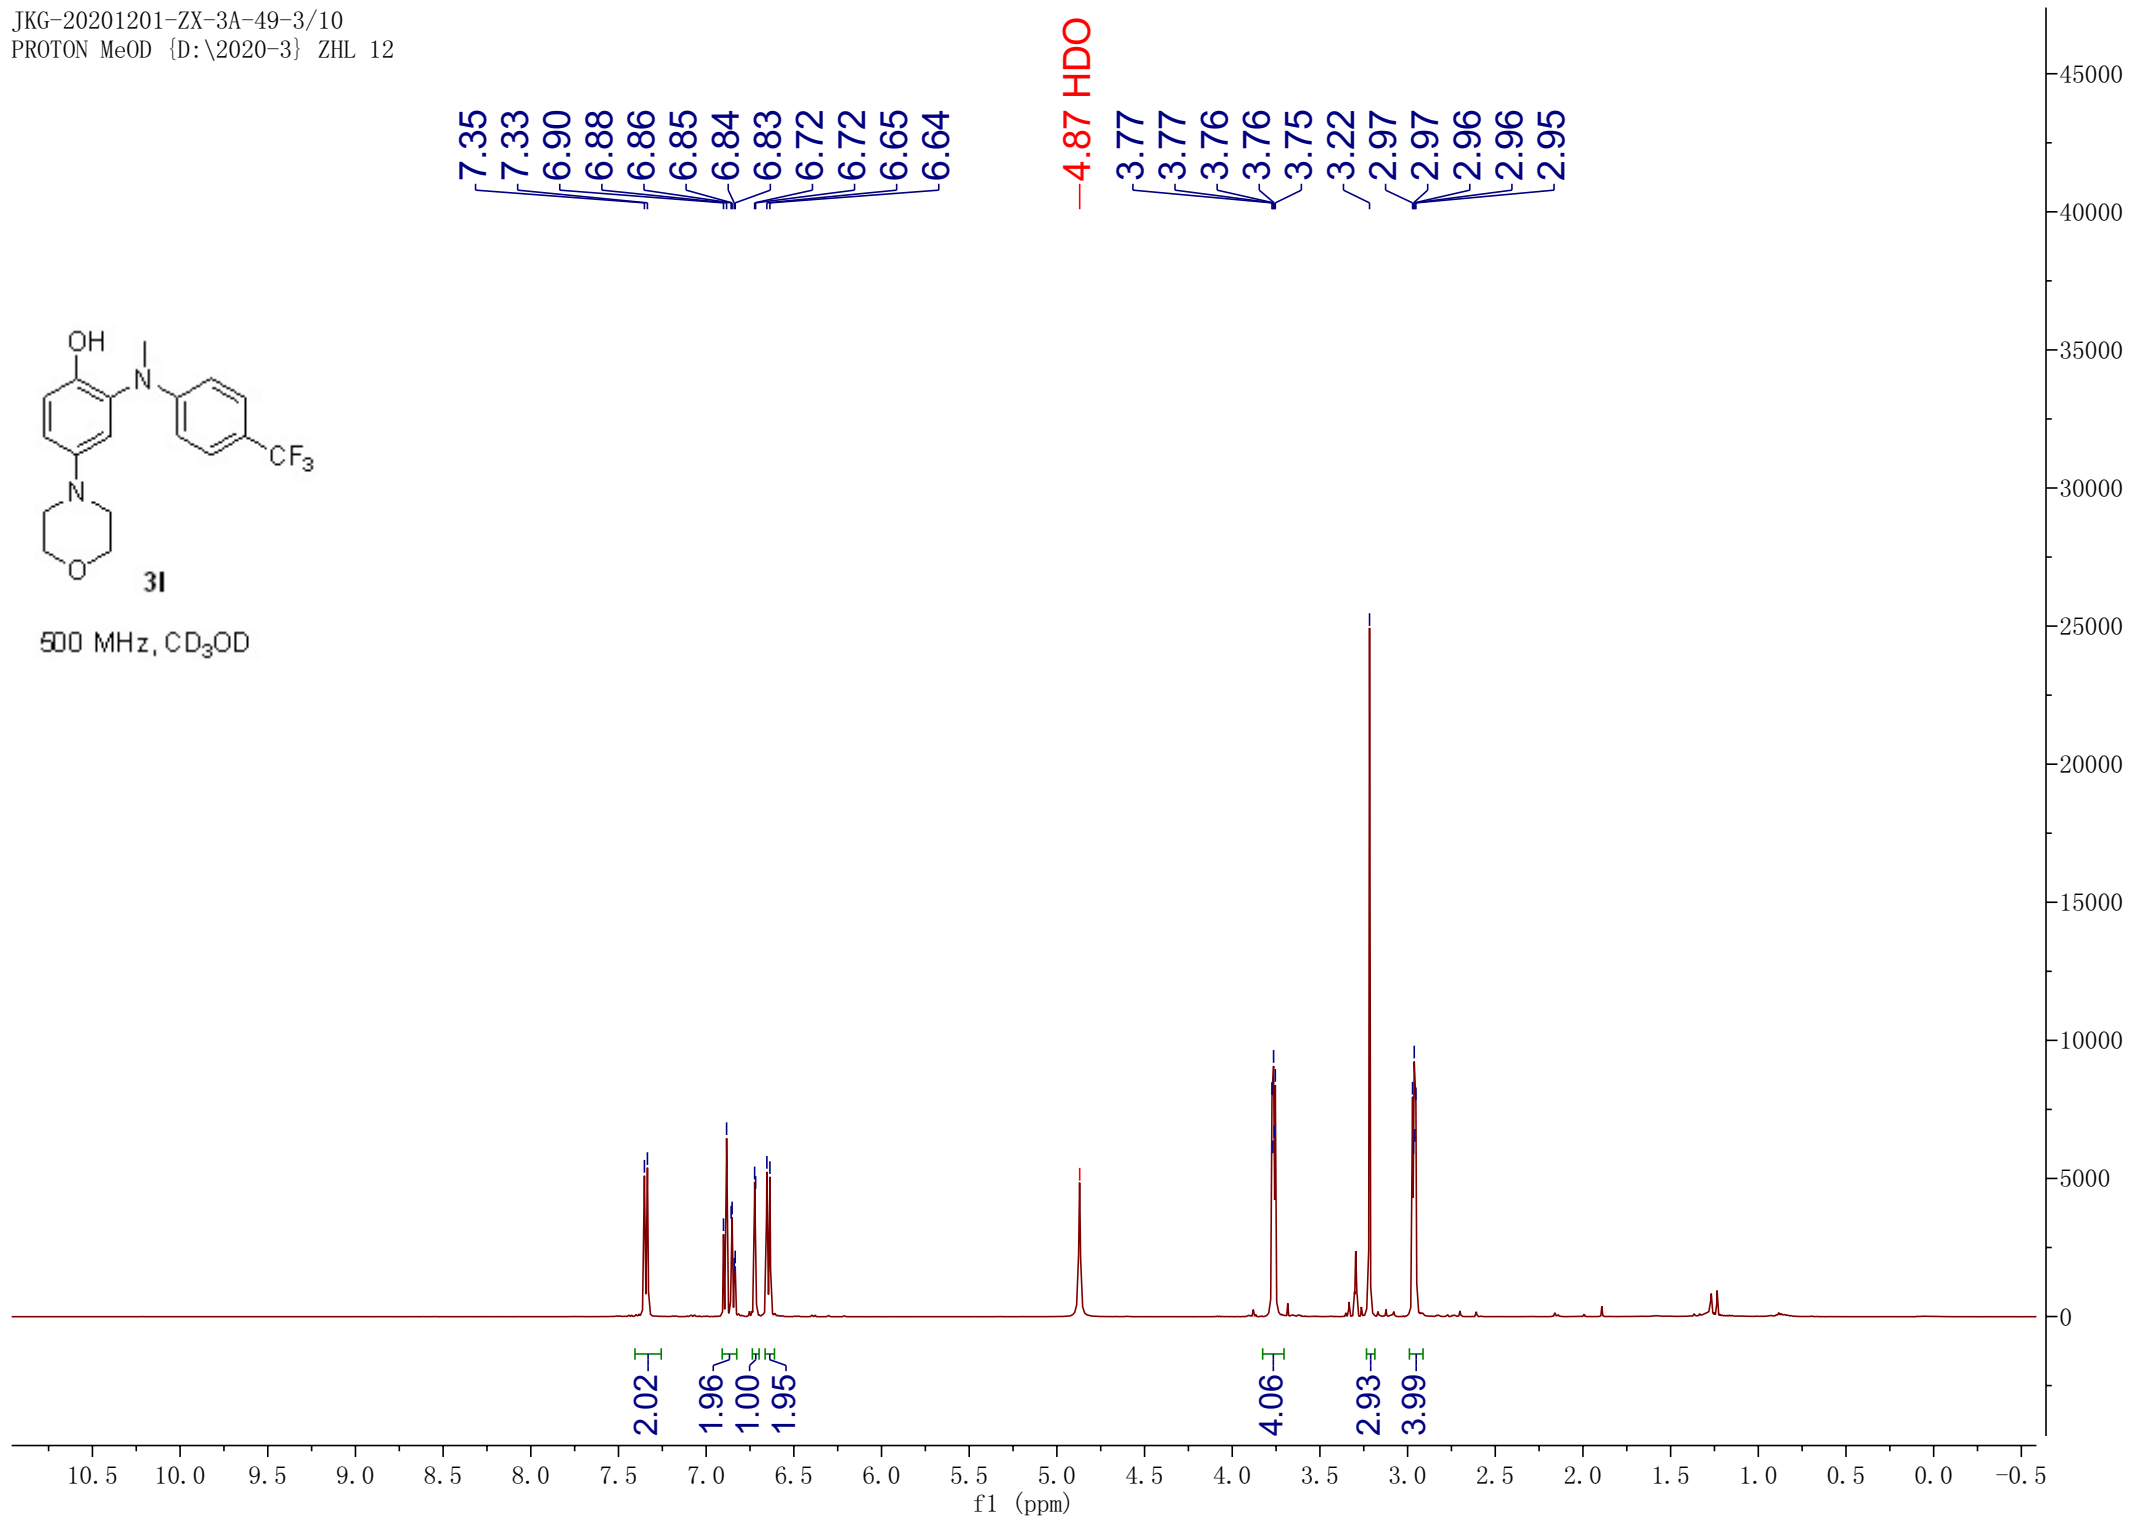

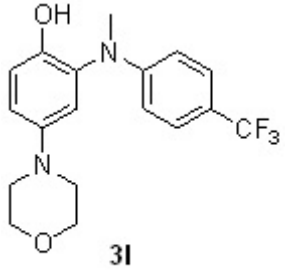

500 MHz, CD<sub>3</sub>OD

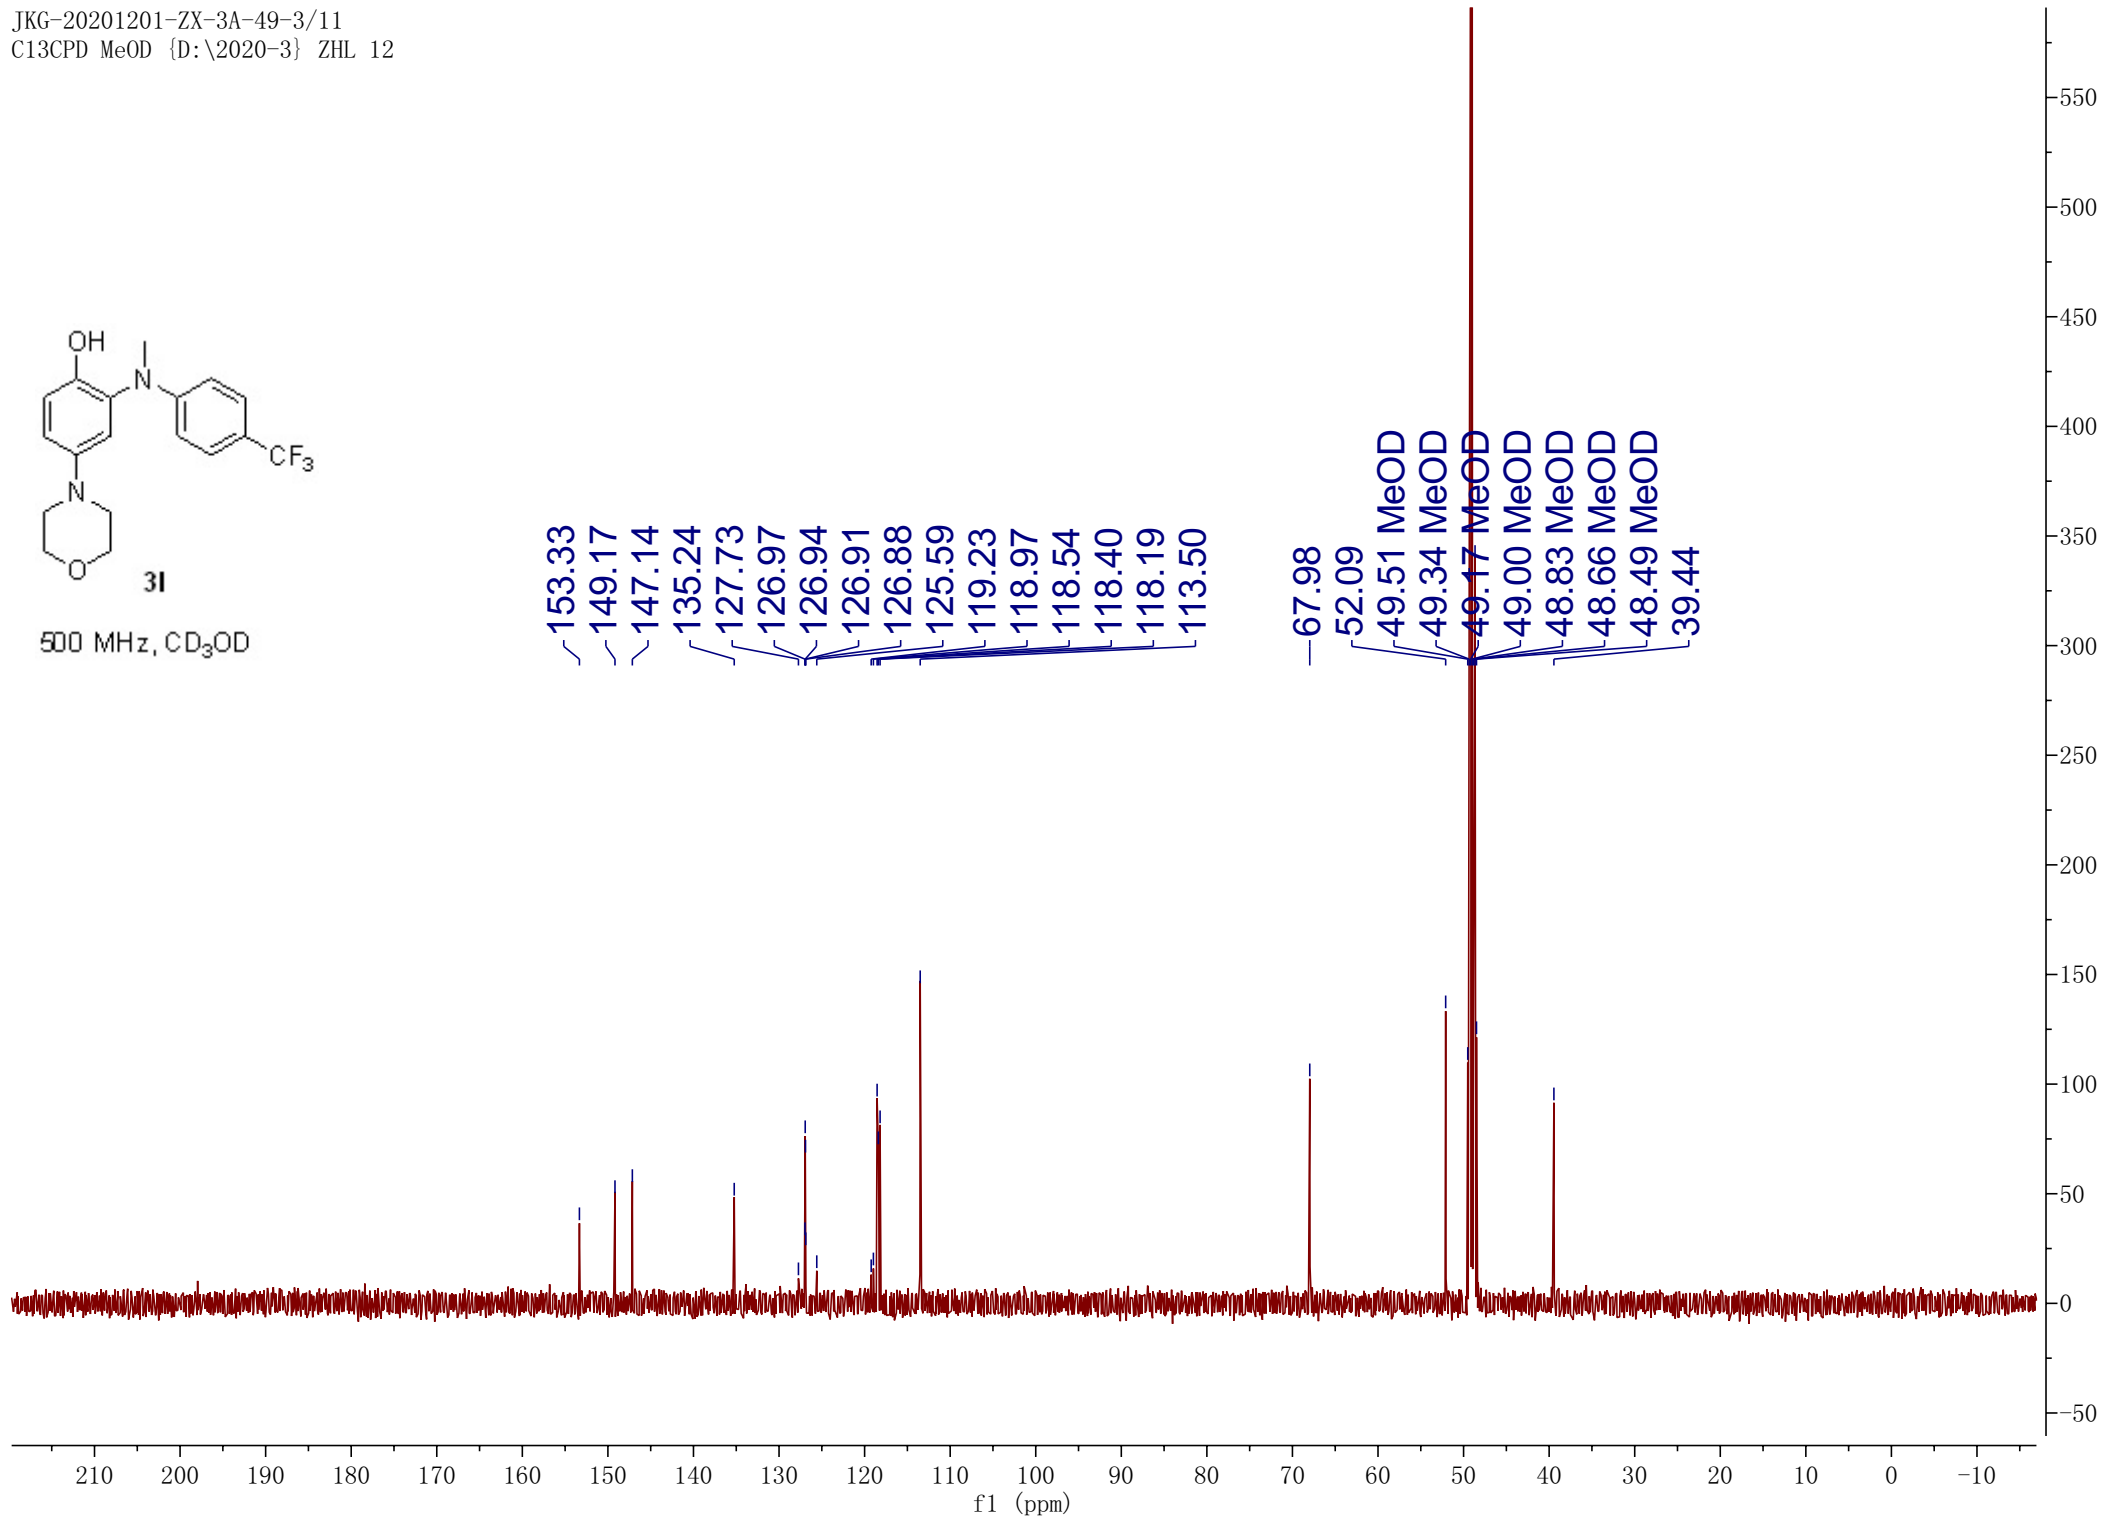

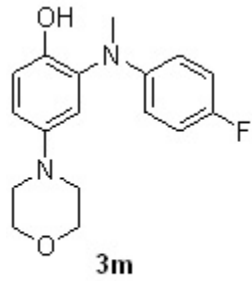

500 MHz, CDCl<sub>3</sub>

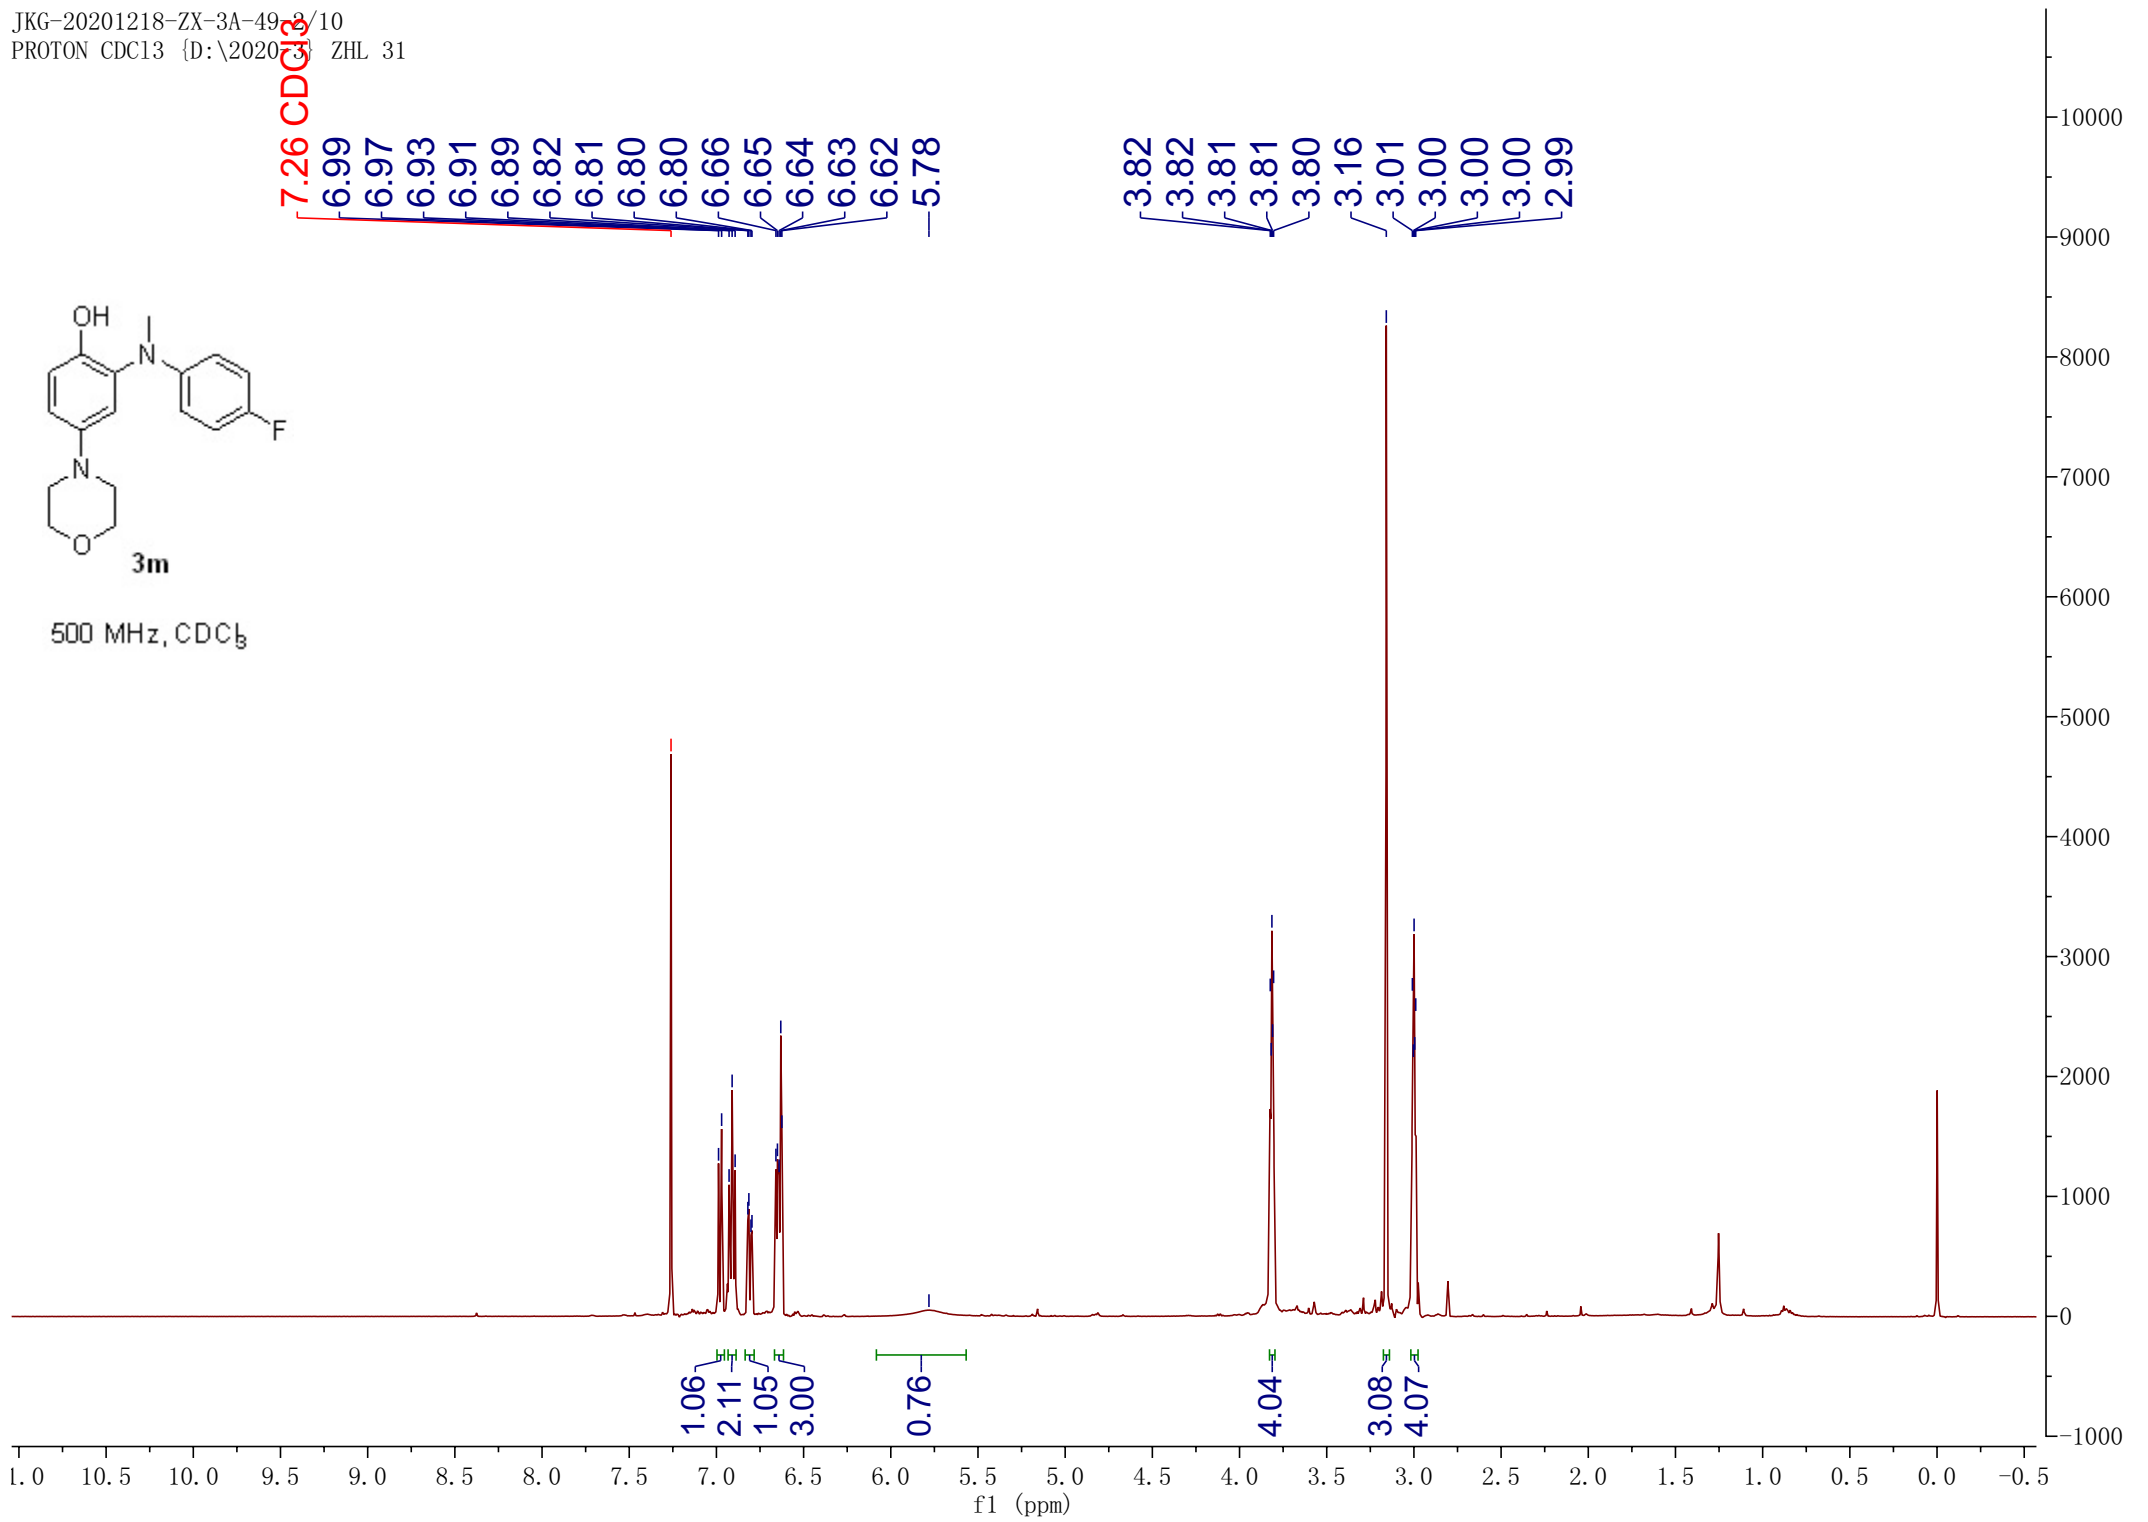

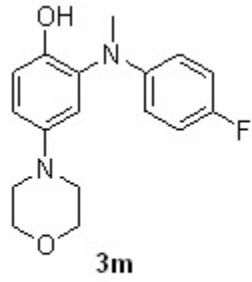

500 MHz, CDC<sub>3</sub>

157.68  
155.79  
146.75  
146.18  
145.64  
145.63  
135.90  
116.40  
115.93  
115.87  
115.70  
115.62  
115.44  
114.80

77.25 CDC13  
77.00 CDC13  
76.75 CDC13  
66.90

50.61

40.24

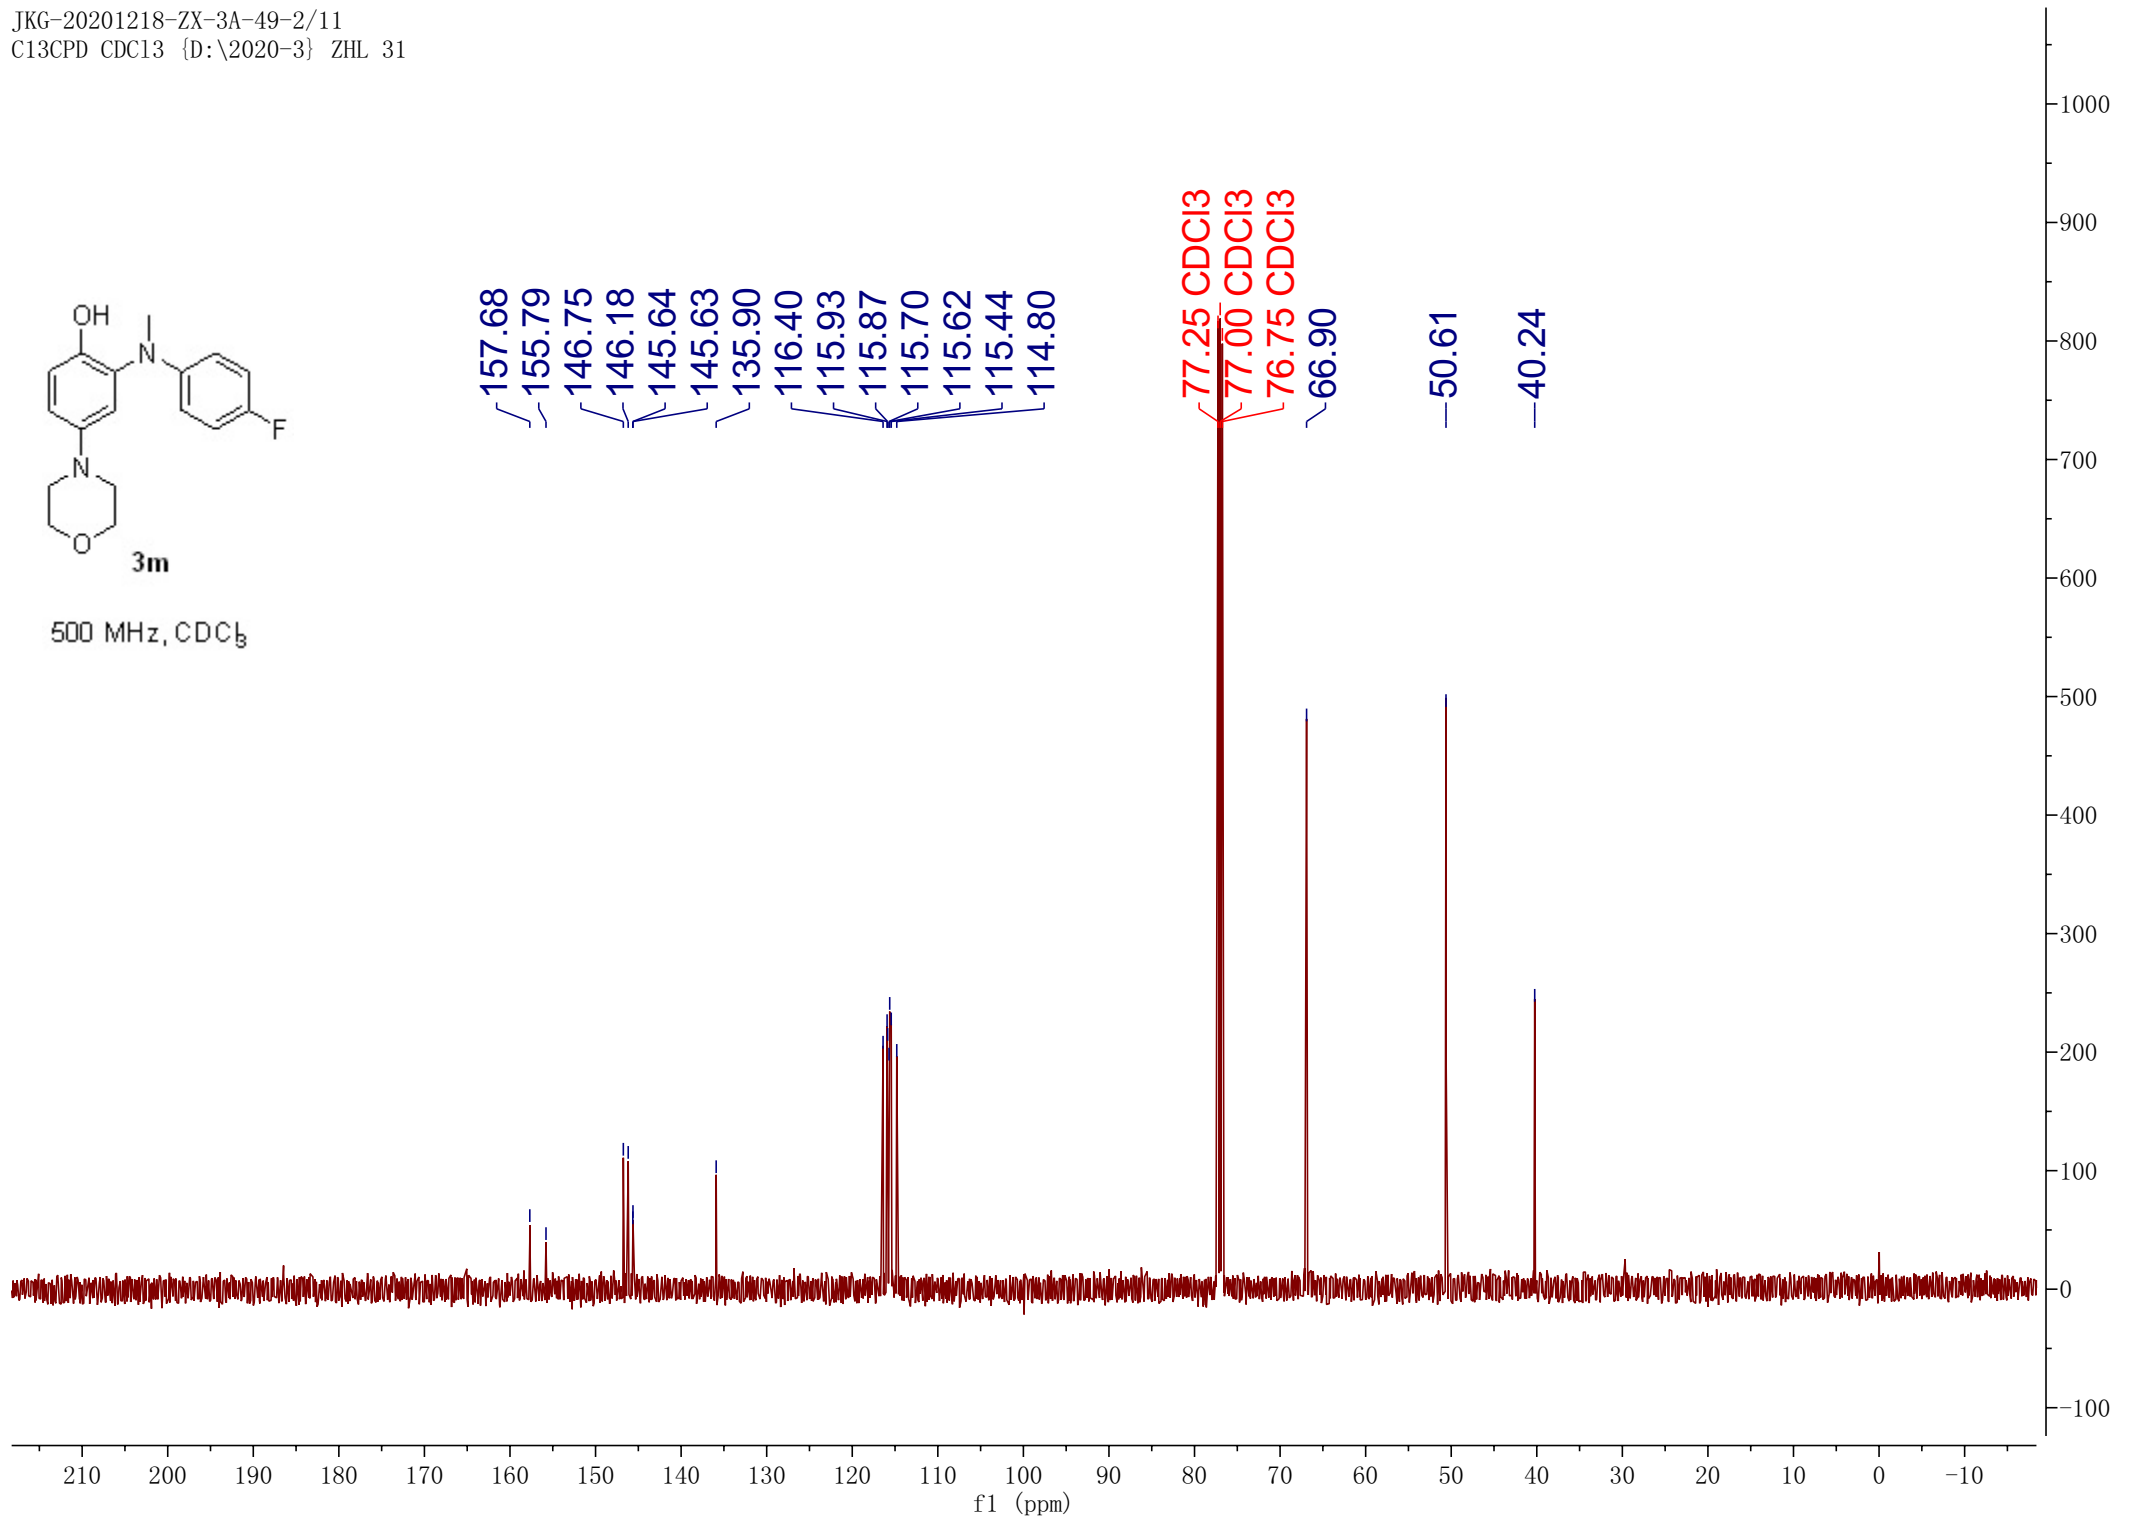



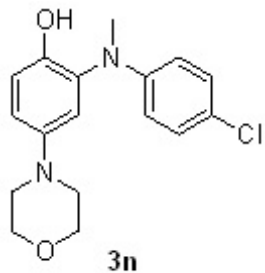

500 MHz, CD<sub>3</sub>OD

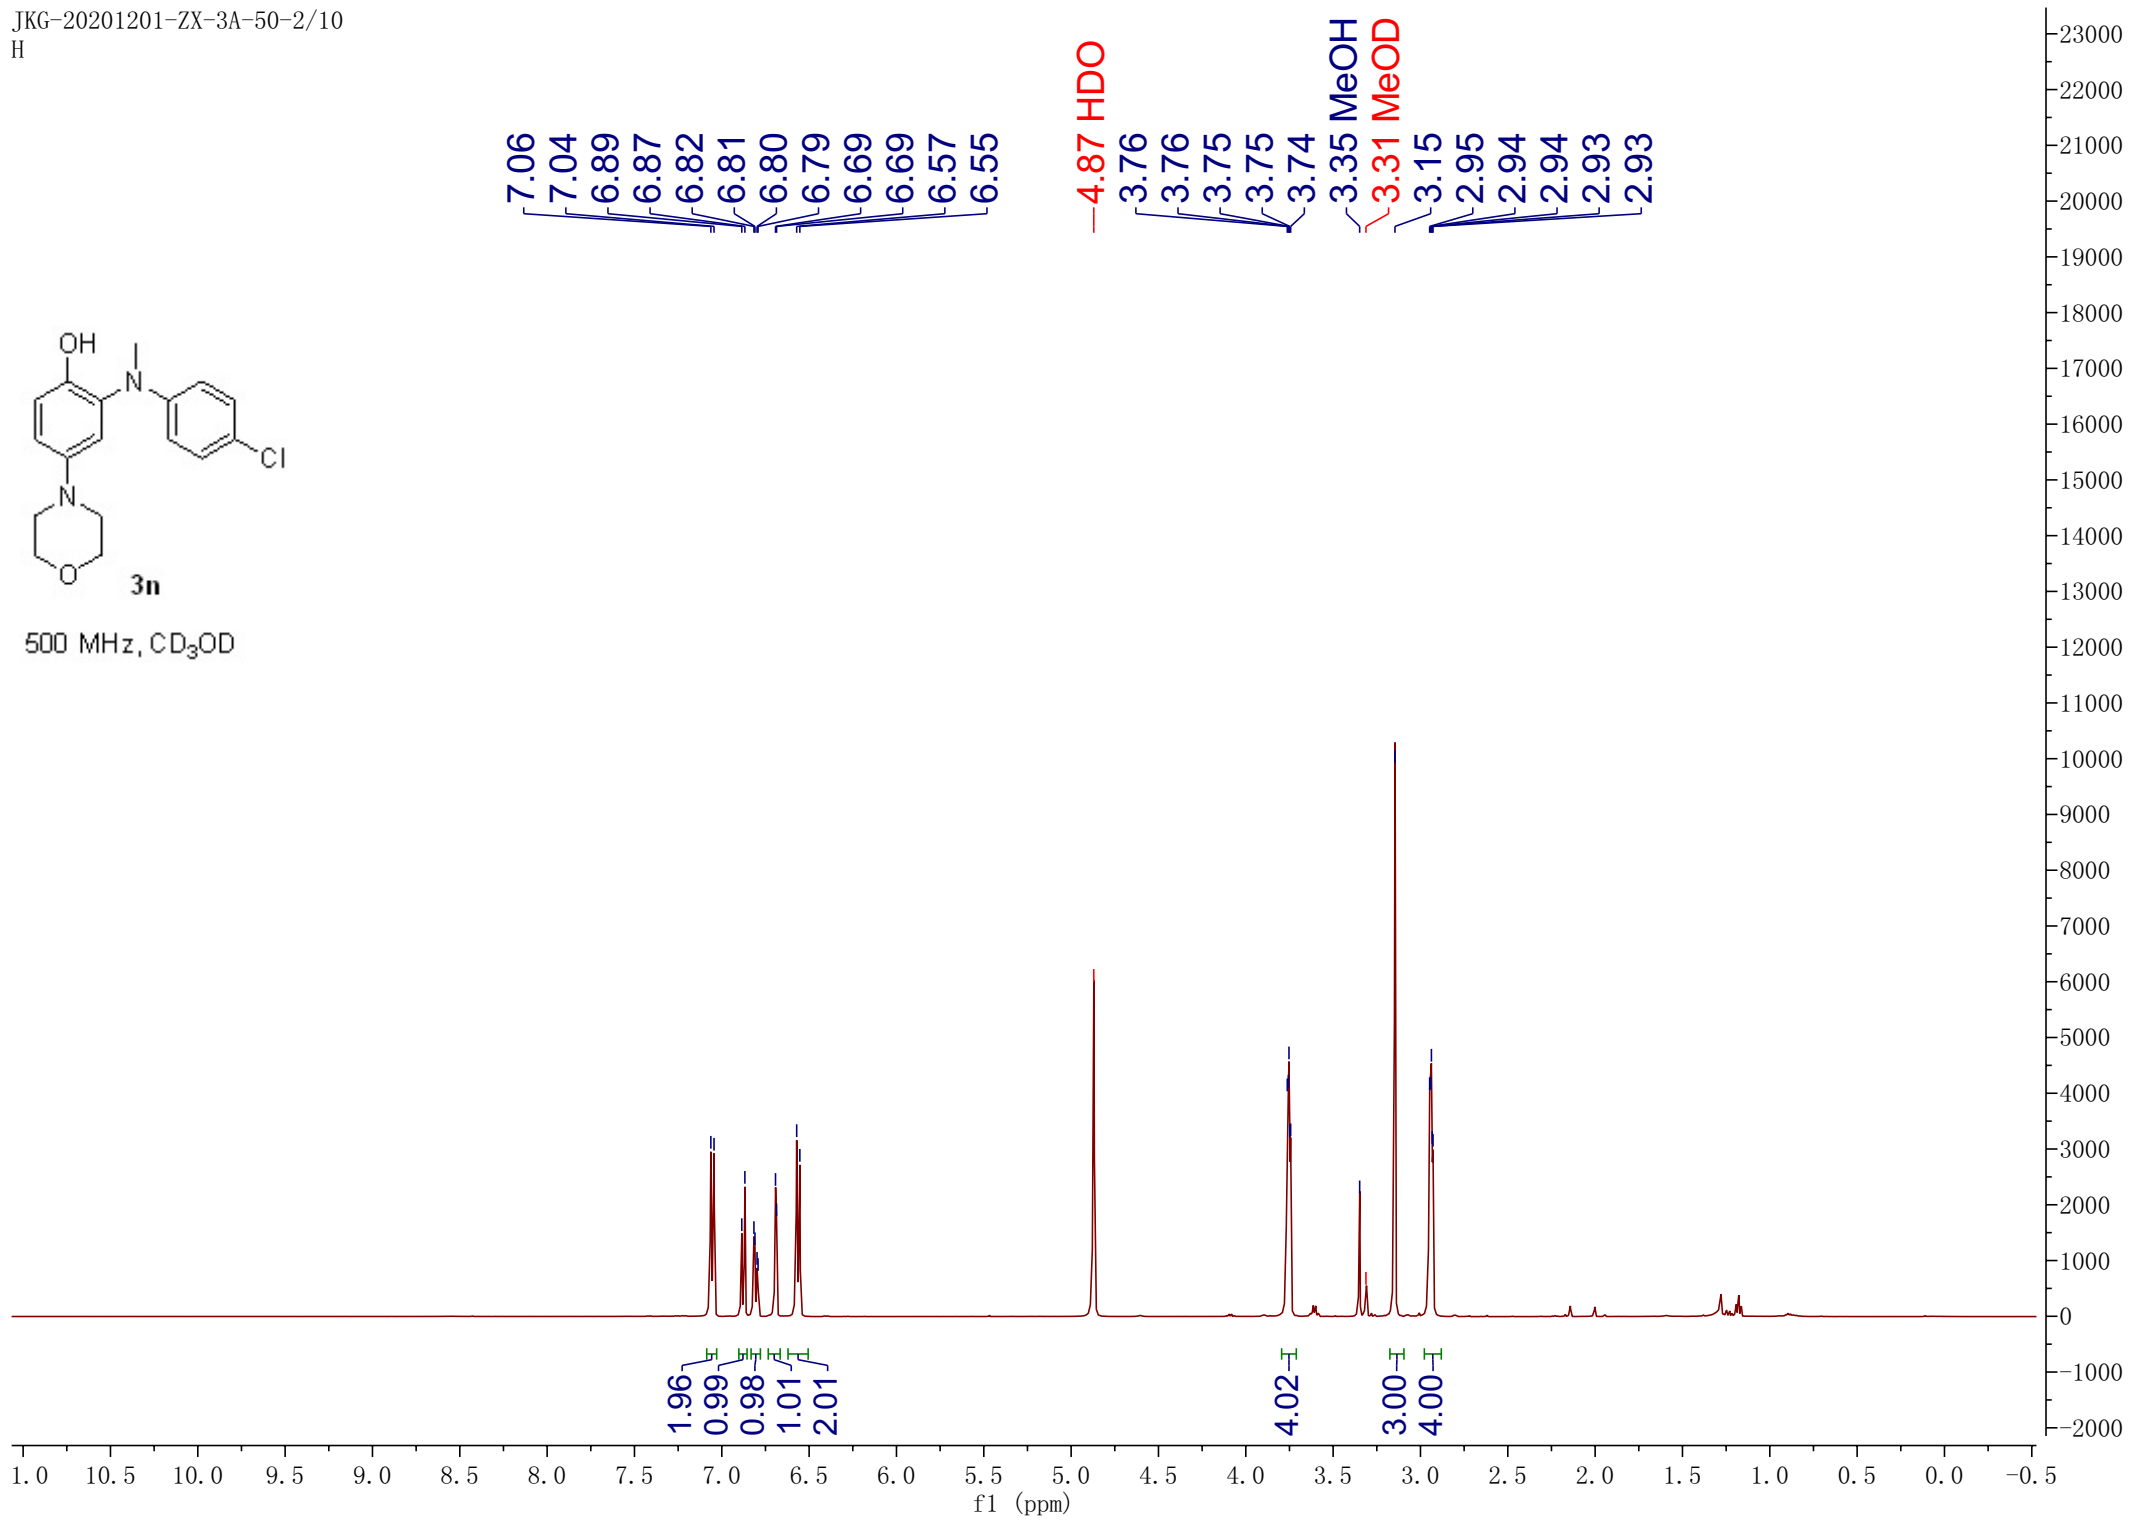

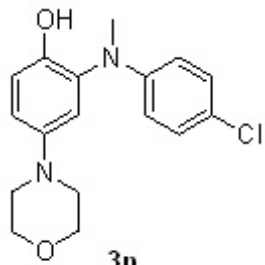

500 MHz, CD<sub>3</sub>OD

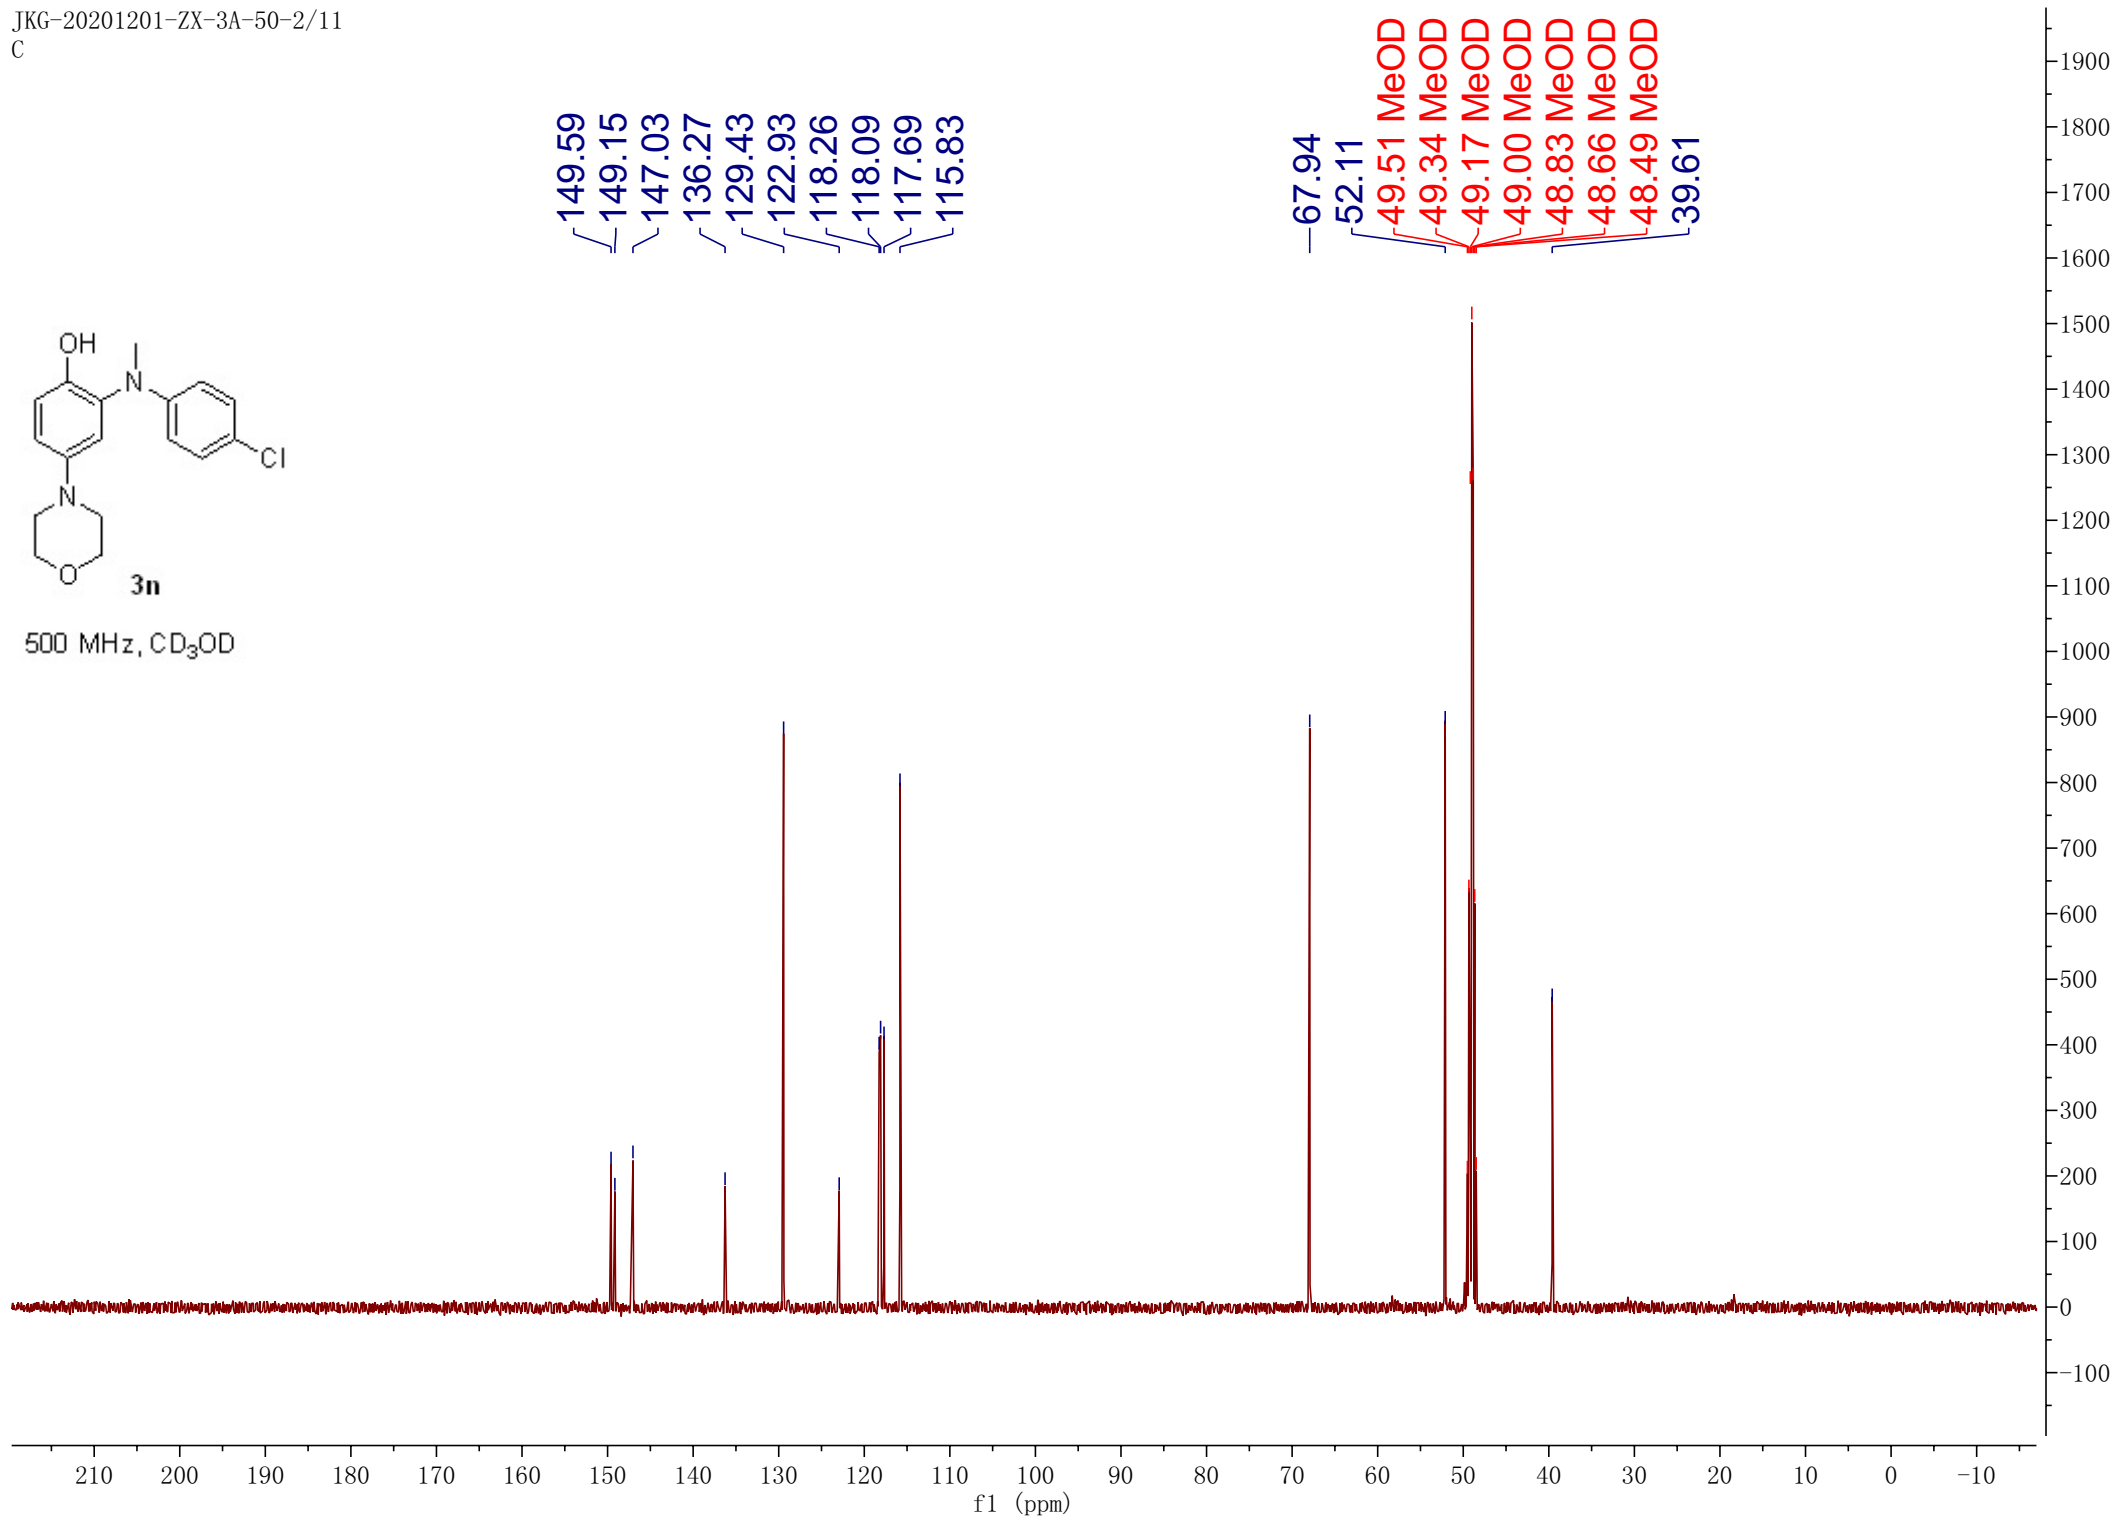

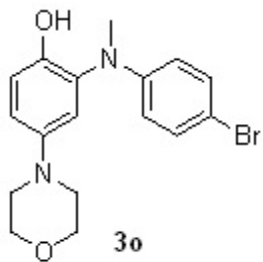

500 MHz, CD<sub>3</sub>OD

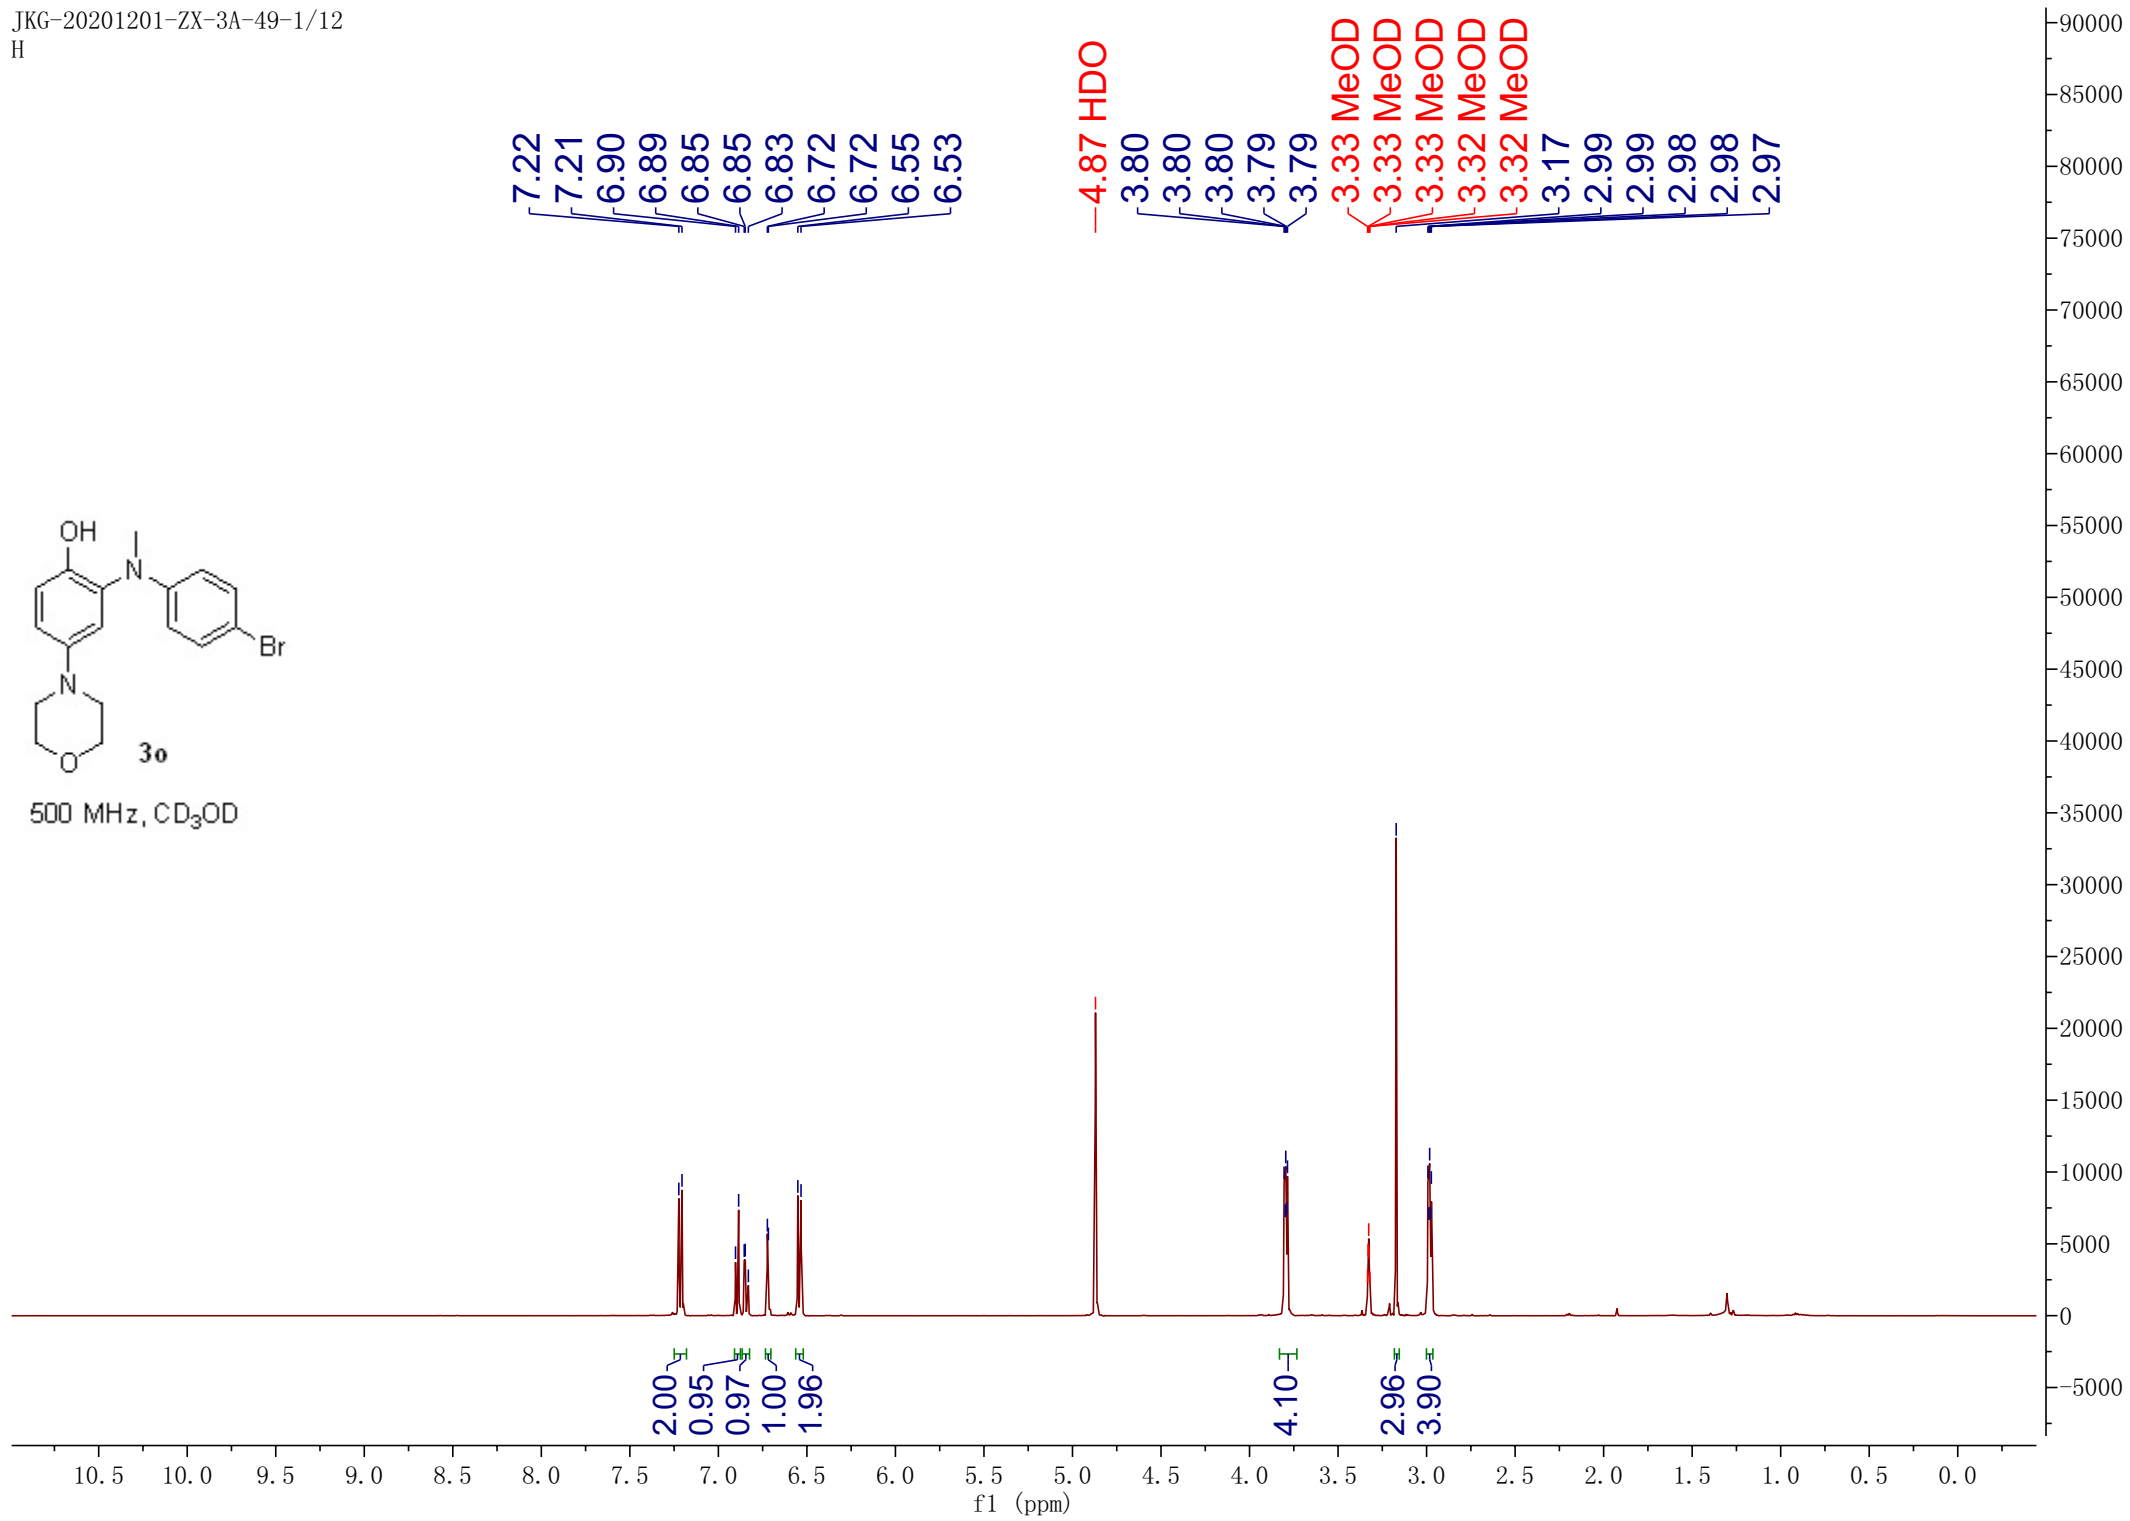

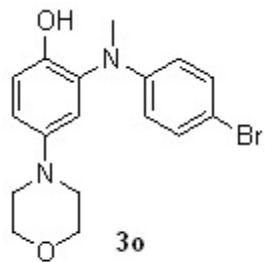

500 MHz, CD<sub>3</sub>OD

150.05  
149.20  
147.11  
136.20  
132.36  
118.31  
118.16  
117.79  
116.32  
109.97

67.99  
52.18  
49.51 MeOD  
49.34 MeOD  
49.17 MeOD  
49.00 MeOD  
48.83 MeOD  
48.66 MeOD  
48.49 MeOD  
39.52

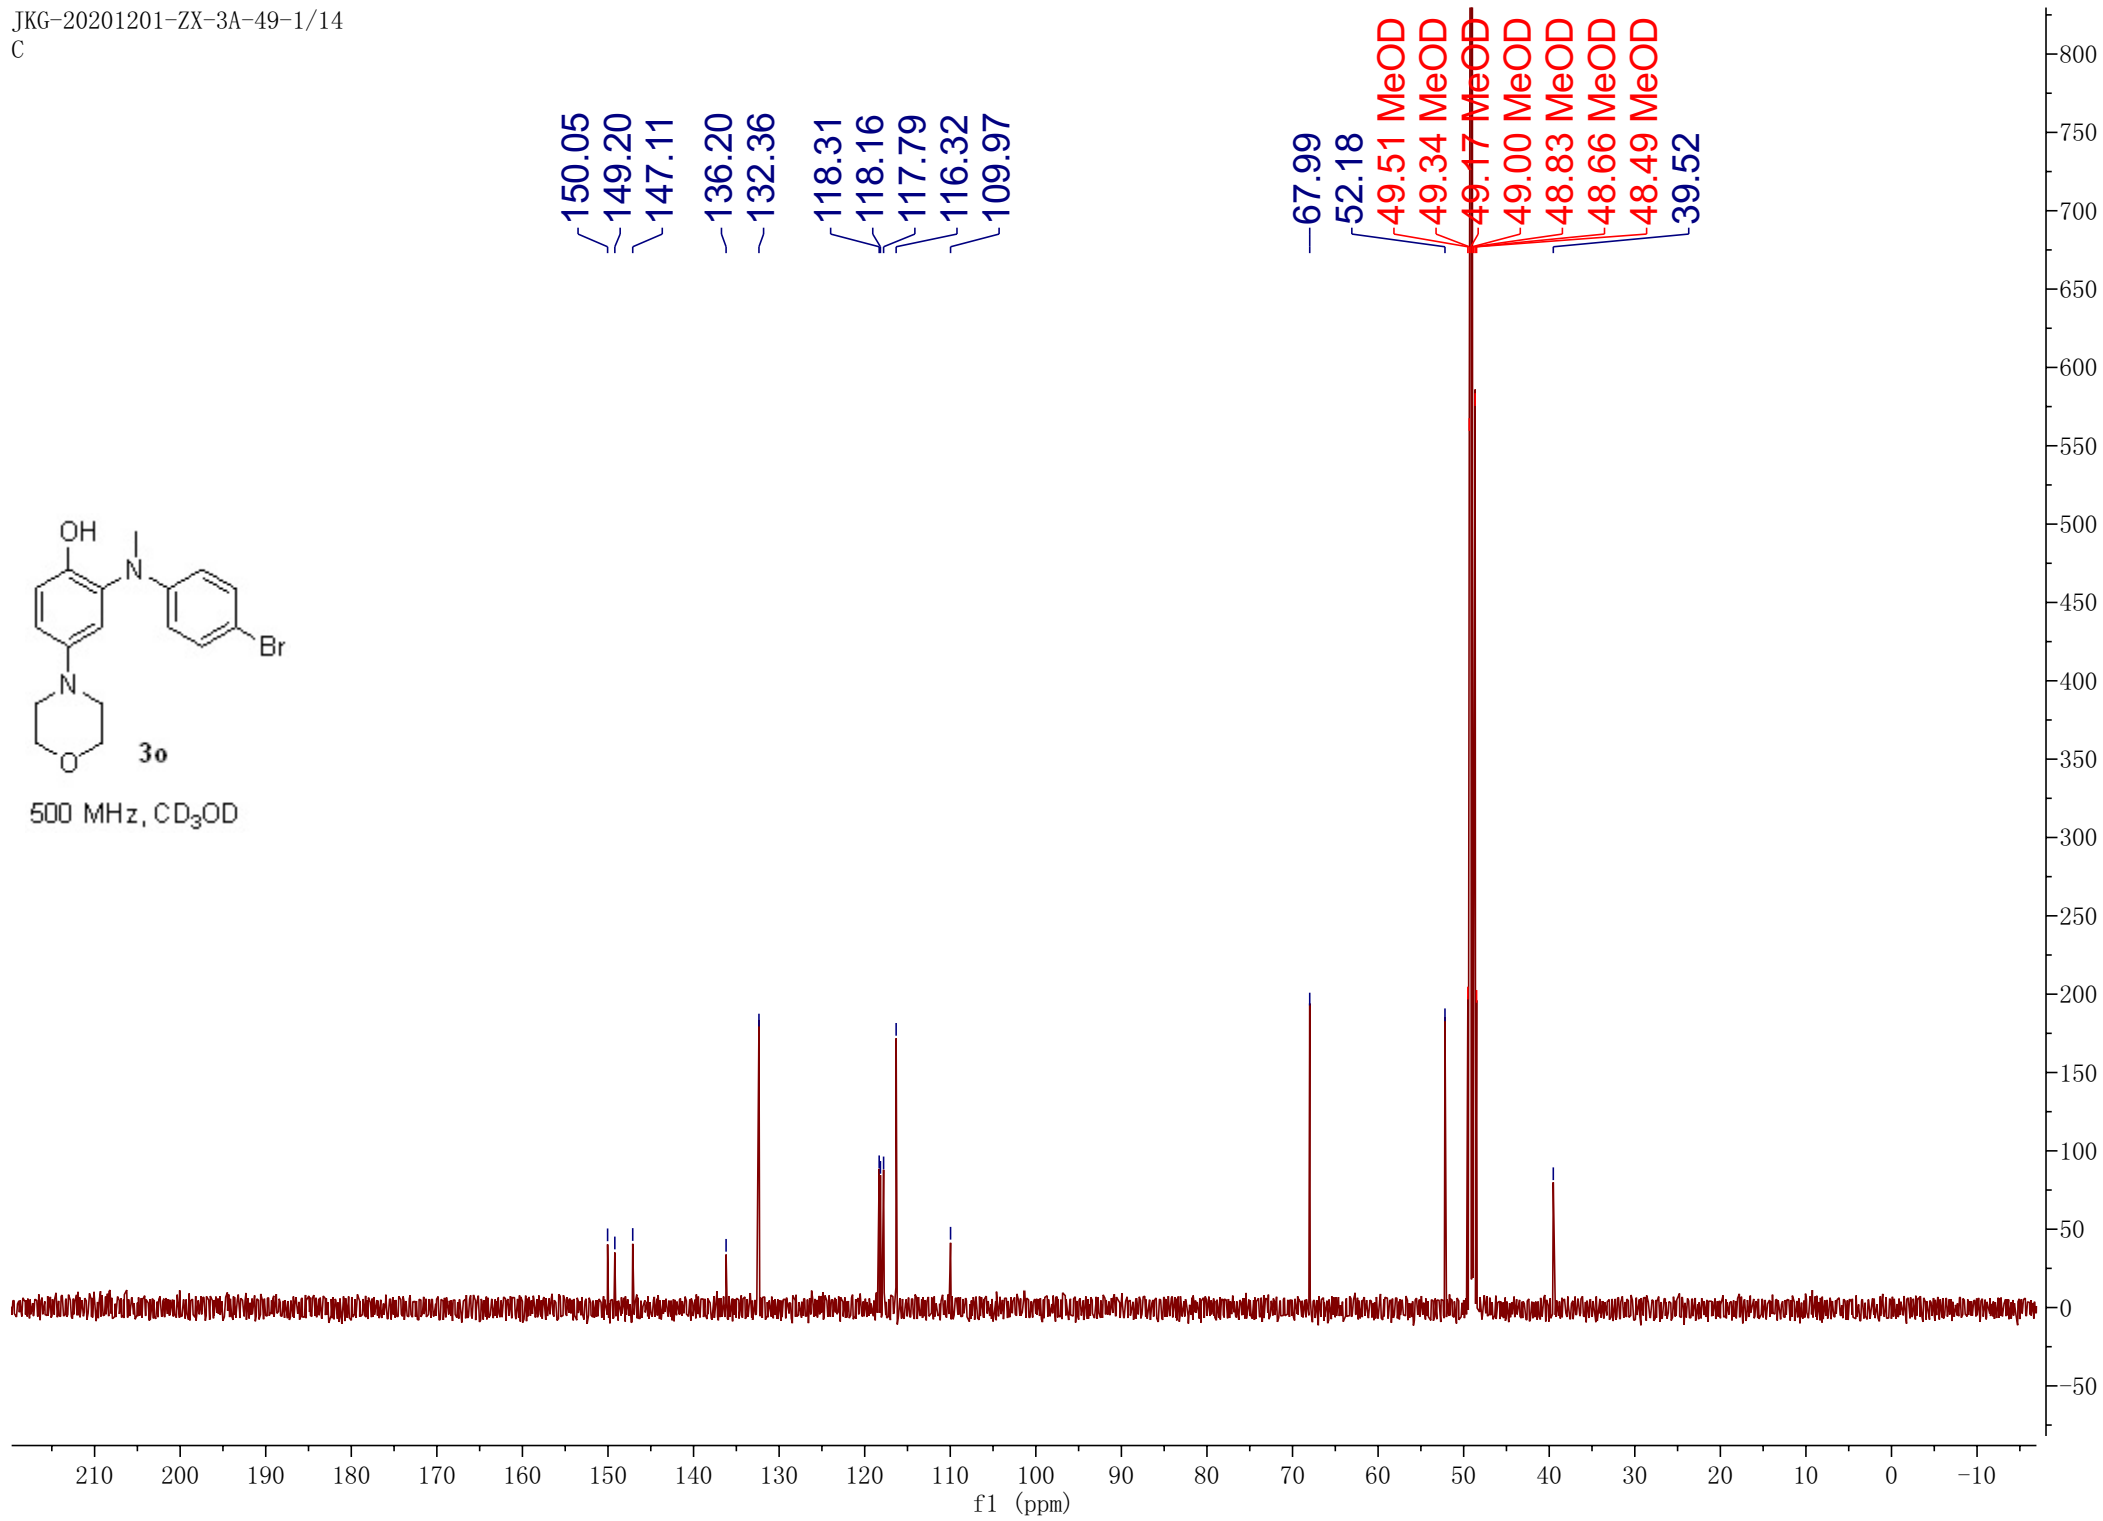

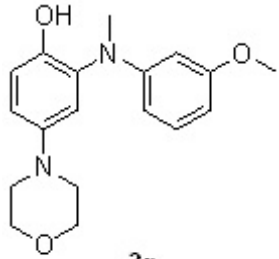

**3p**

500 MHz, CD<sub>3</sub>OD

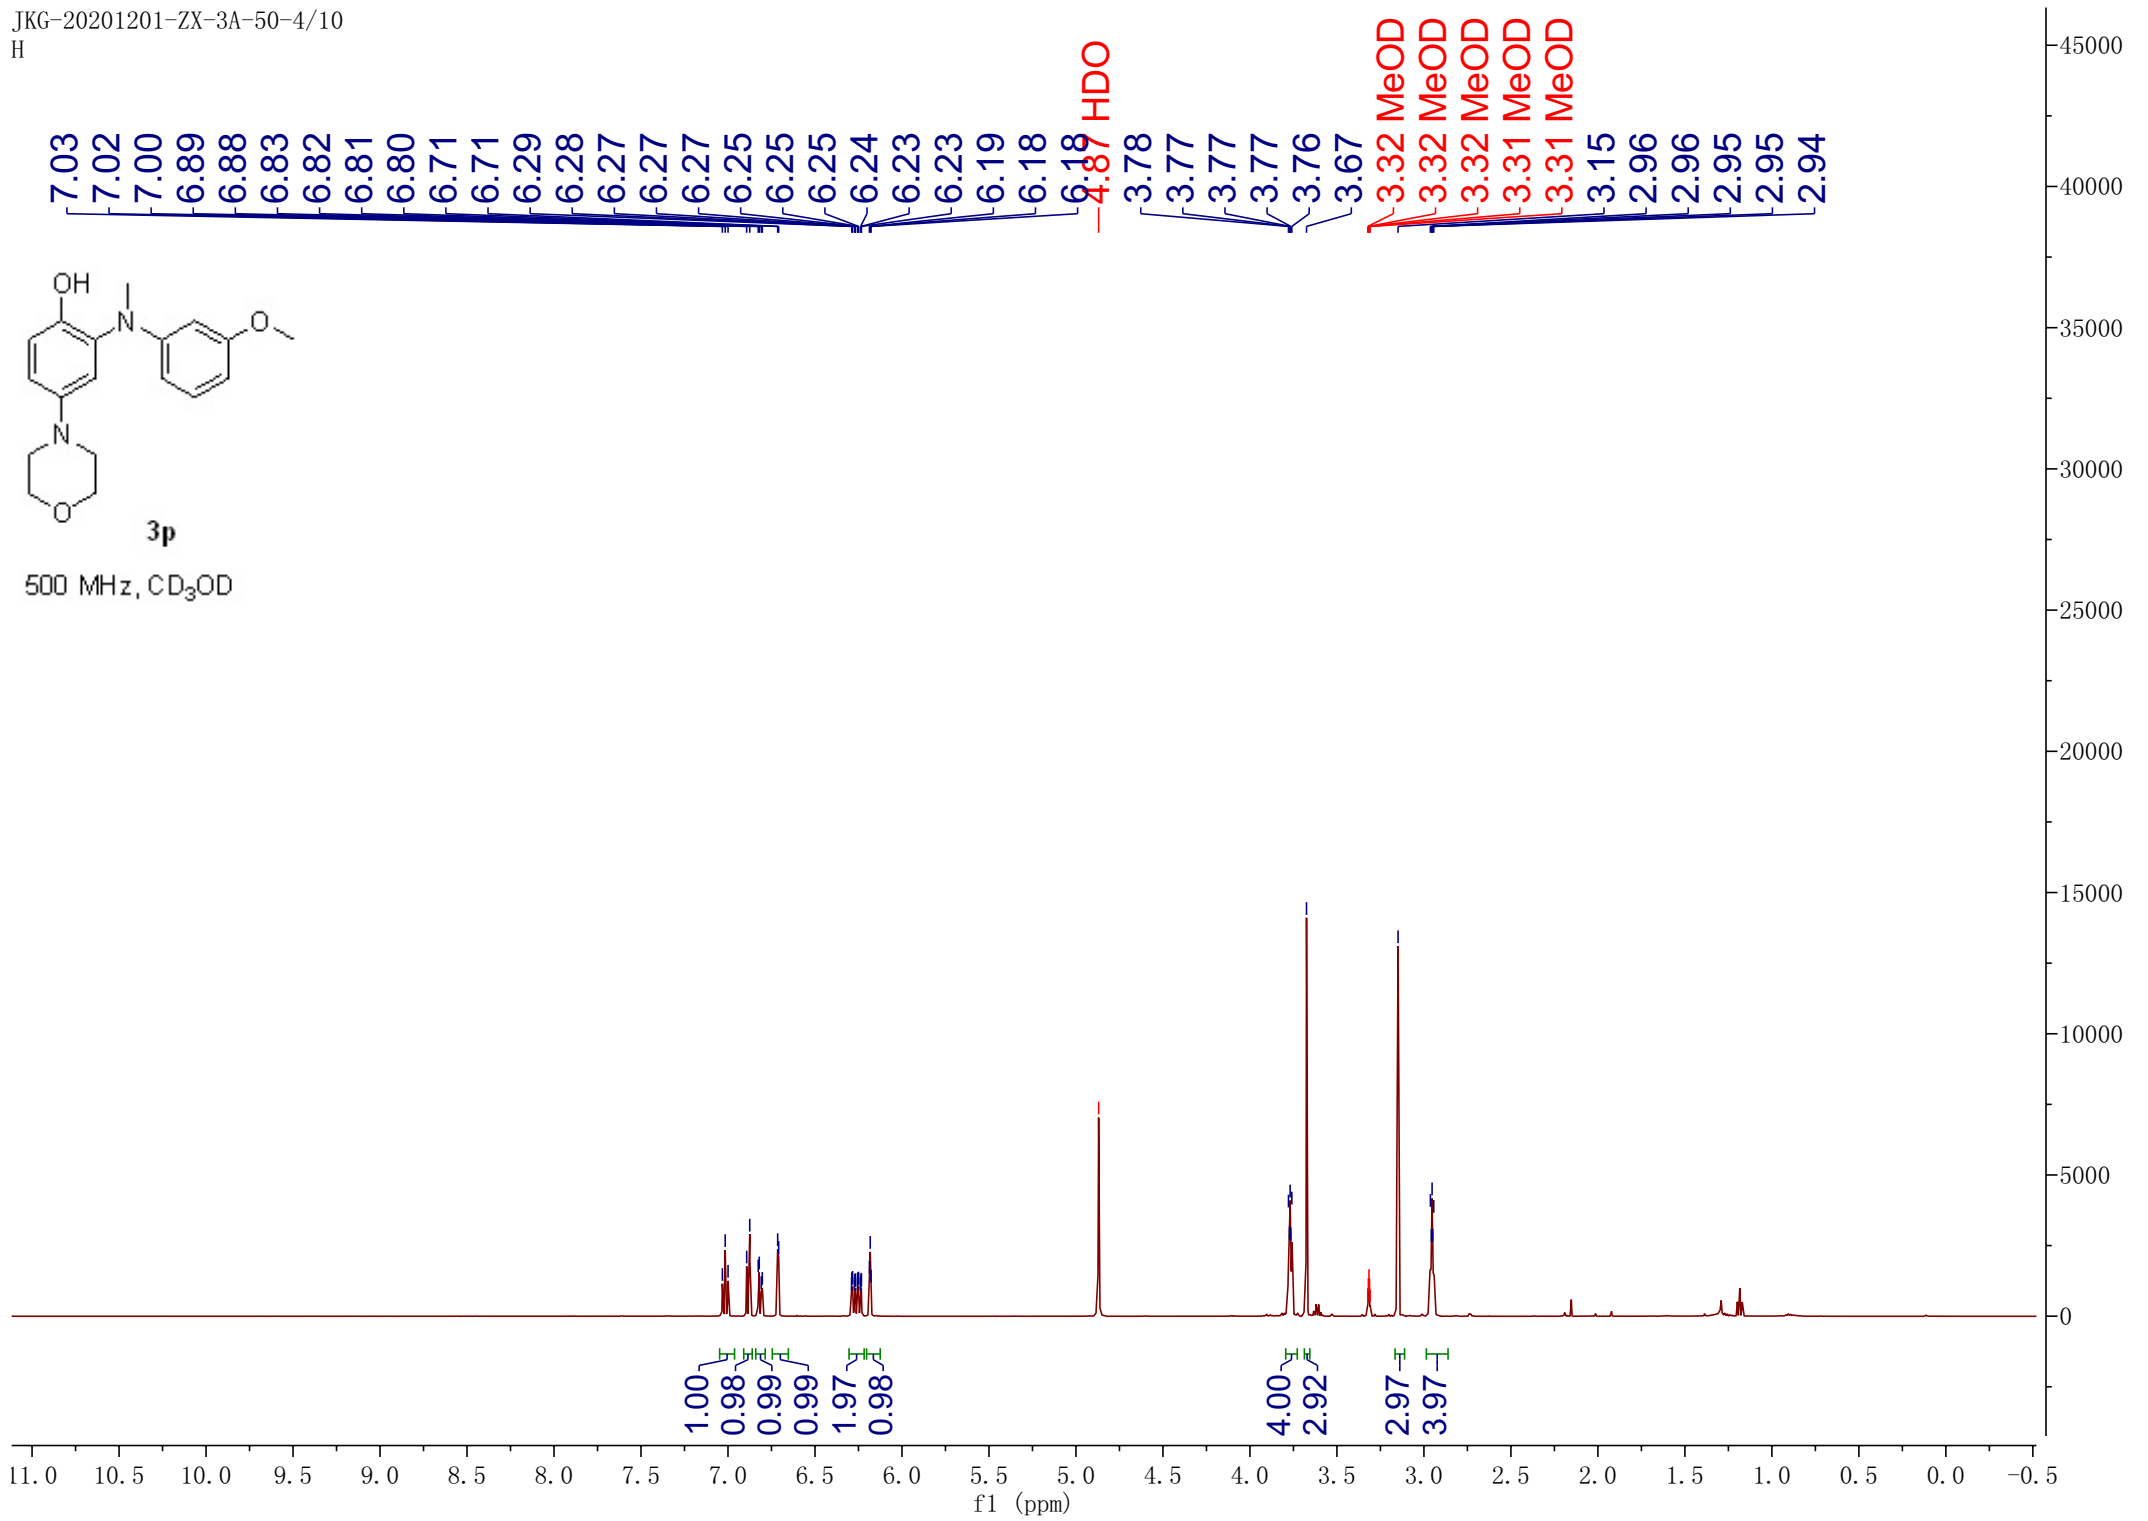

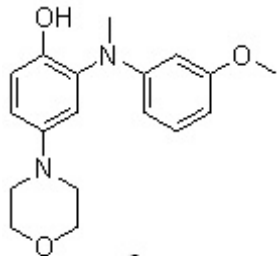

**3p**

500 MHz, CD<sub>3</sub>OD

-160.52  
 -150.88  
 -147.90  
 -145.59  
  
 -135.40  
 -129.02  
  
 116.95  
 116.70  
 116.22  
 106.56  
 102.22  
 99.81

-66.59  
 54.03  
 50.87  
 48.14 MeOD  
 47.97 MeOD  
 47.80 MeOD  
 47.63 MeOD  
 47.46 MeOD  
 47.28 MeOD  
 47.11 MeOD  
 38.17

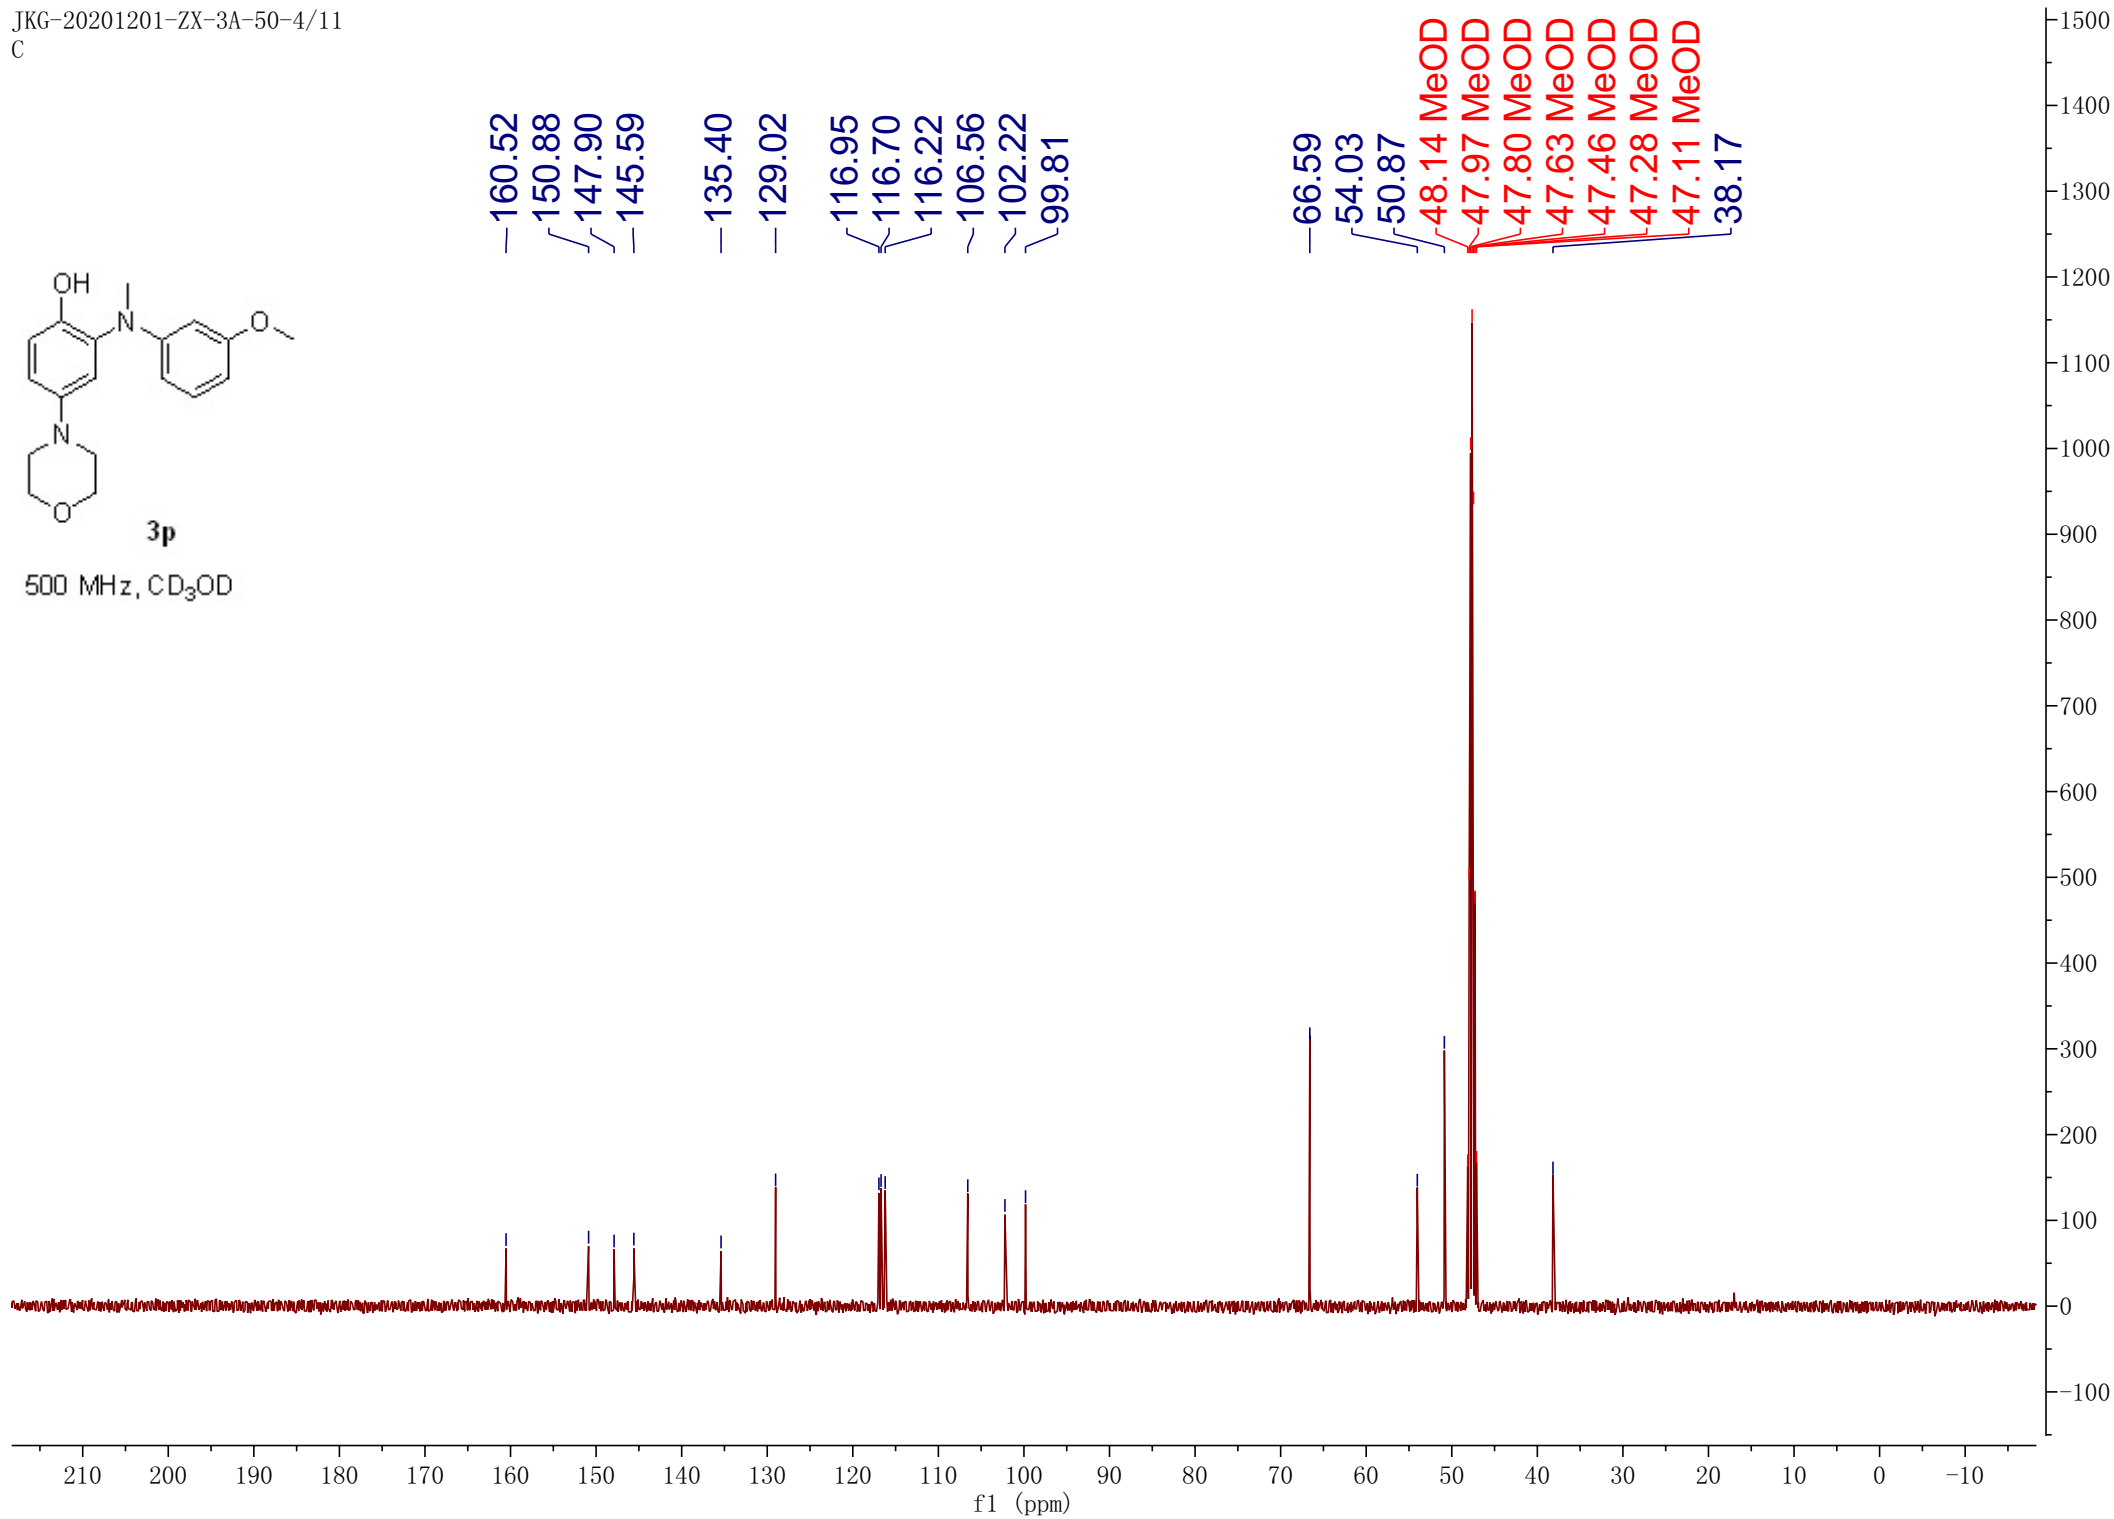

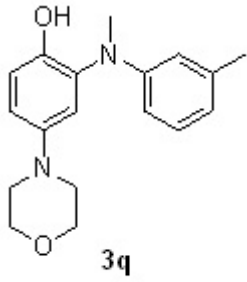

500 MHz, CD<sub>3</sub>OD

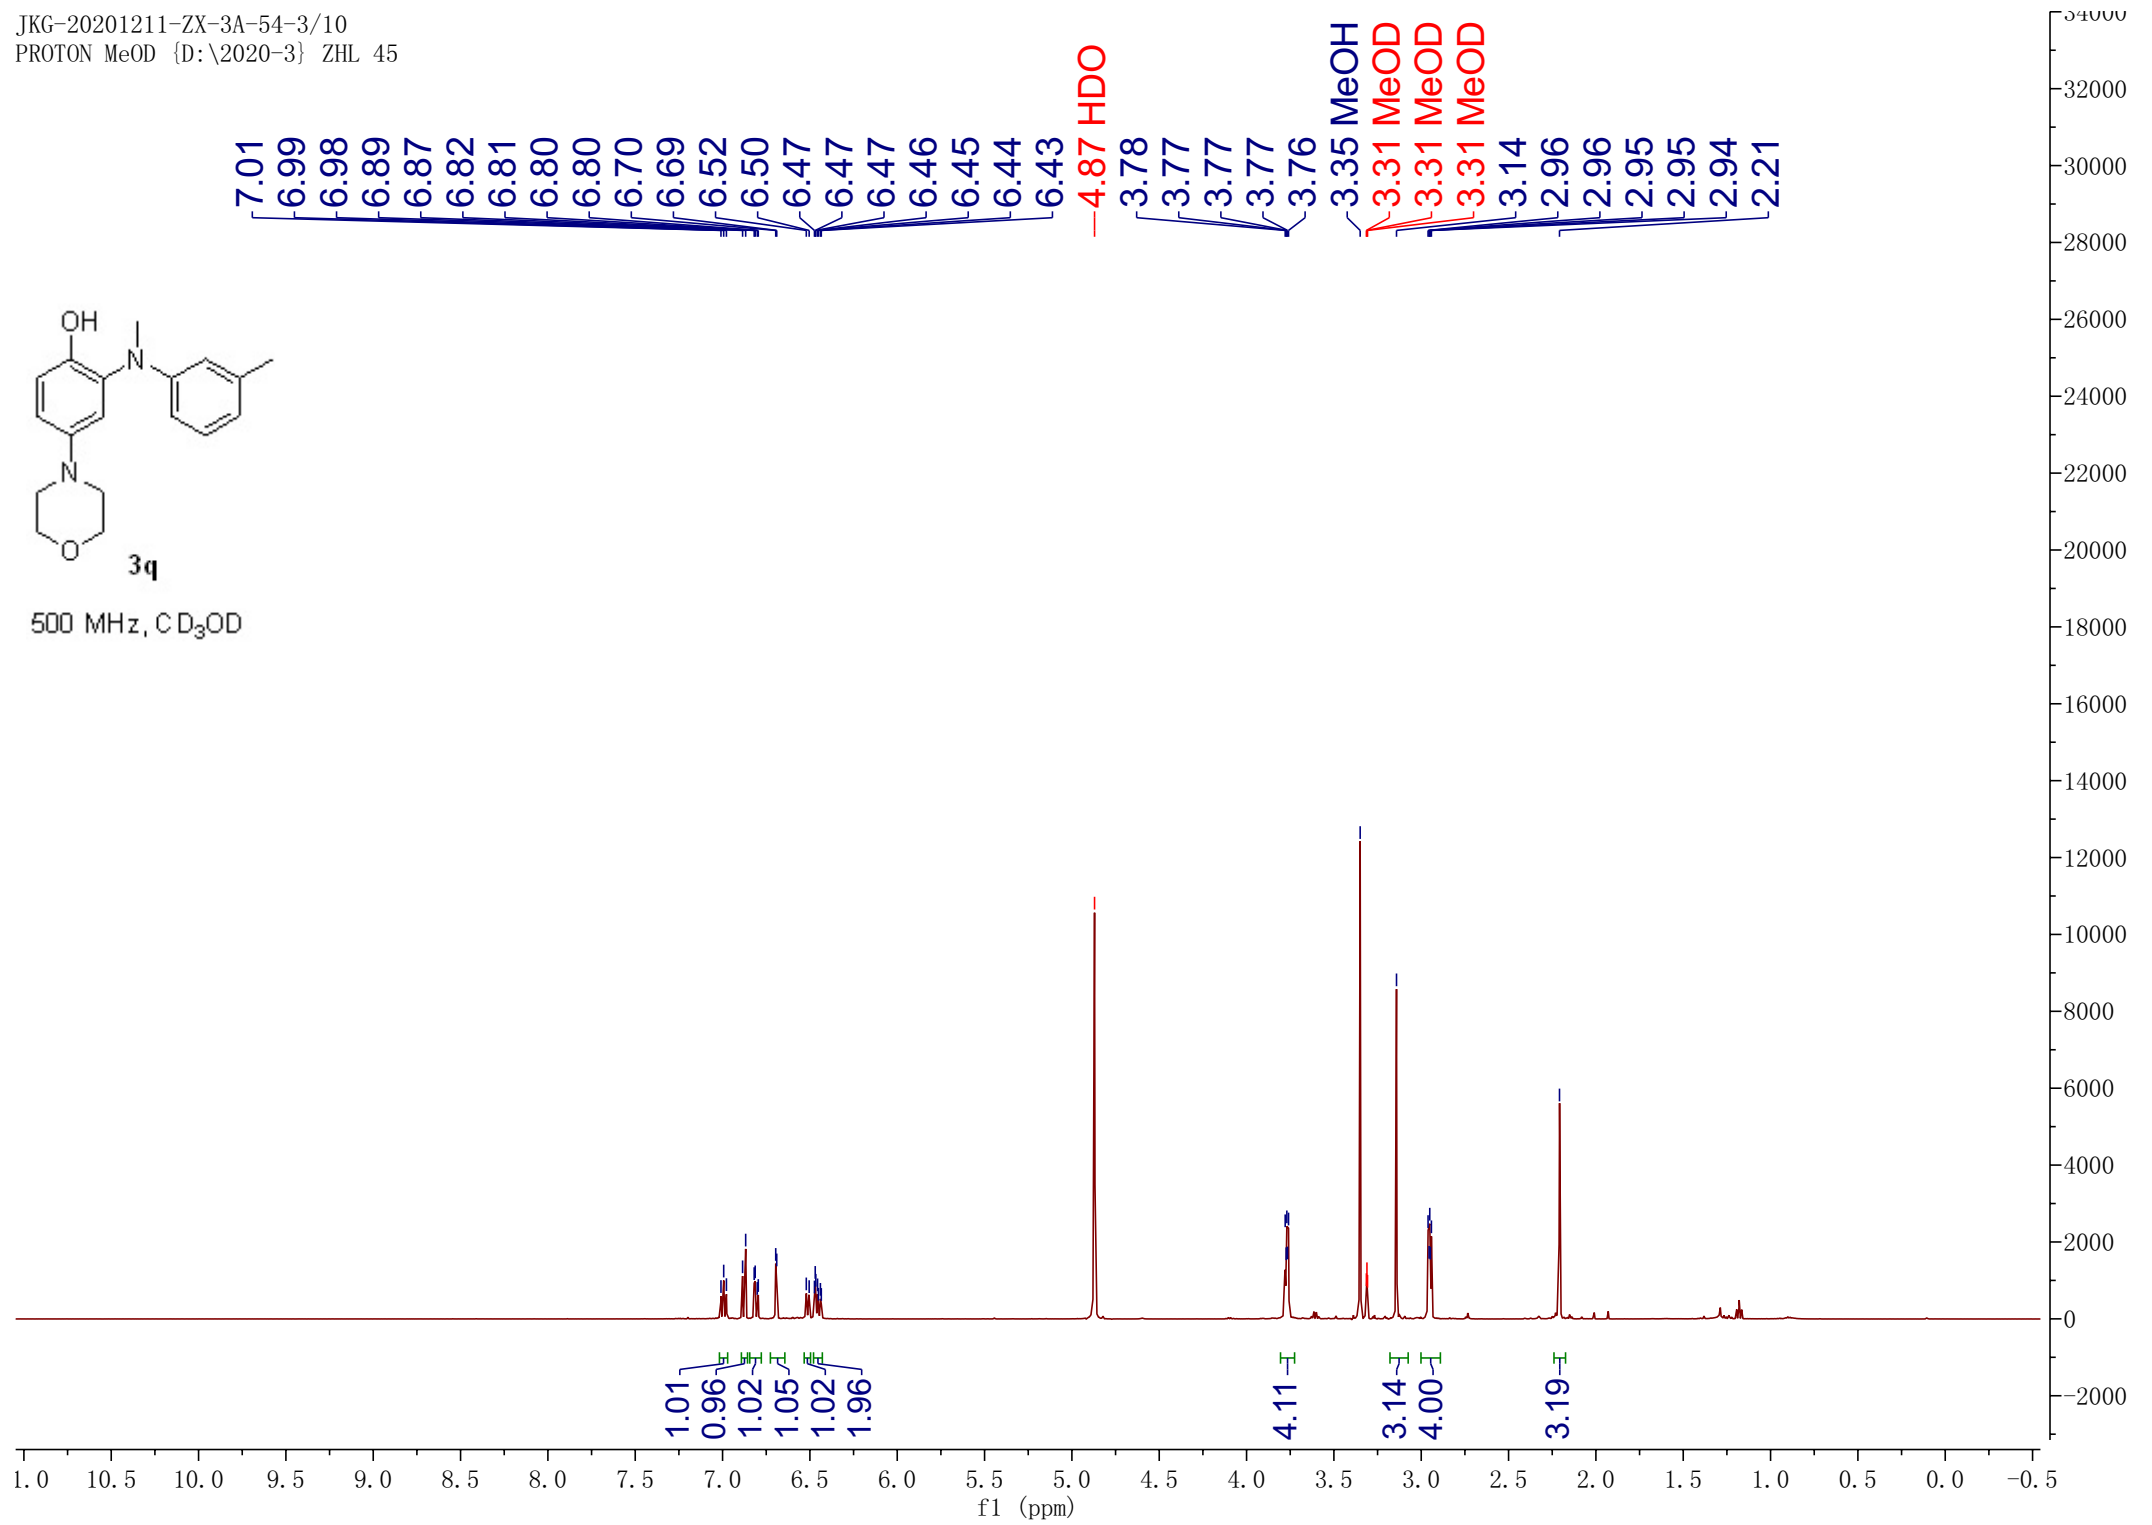

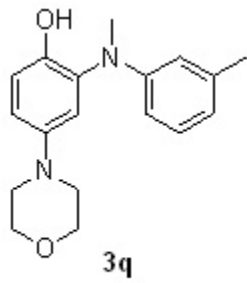

500 MHz, CD<sub>3</sub>OD

150.97  
149.31  
146.98  
139.30  
137.19  
129.57  
119.44  
118.22  
117.96  
117.40  
115.64  
112.32

67.98  
52.27  
49.51 MeOD  
49.34 MeOD  
49.17 MeOD  
49.00 MeOD  
48.83 MeOD  
48.66 MeOD  
48.49 MeOD  
39.55  
-21.87

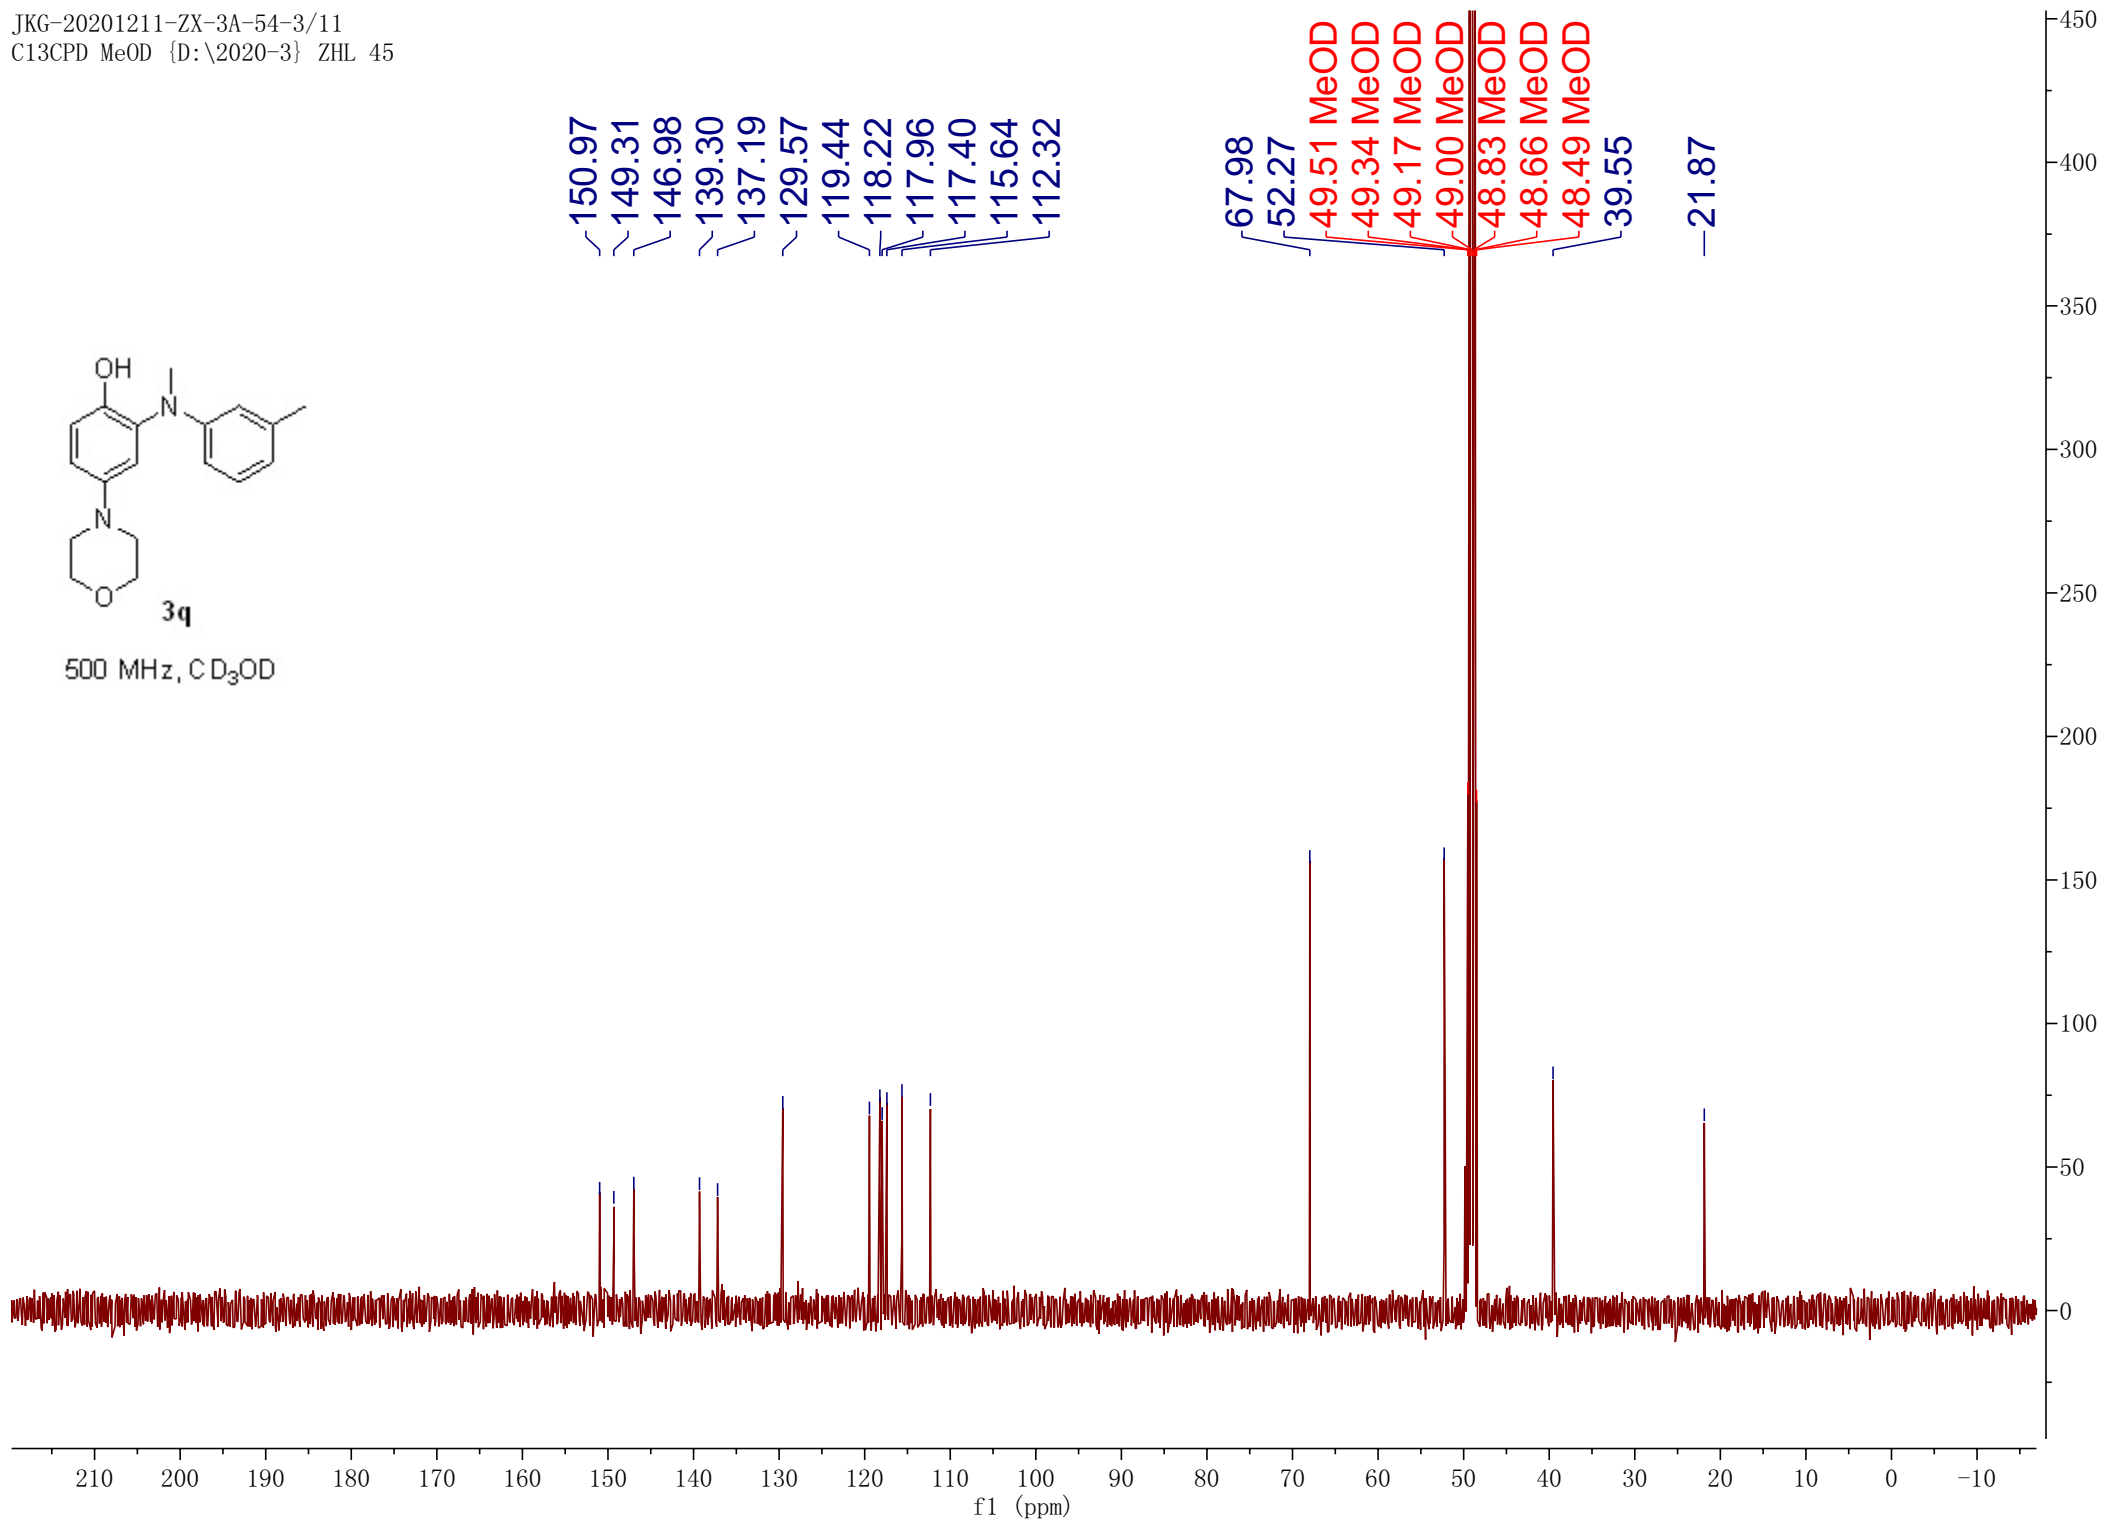



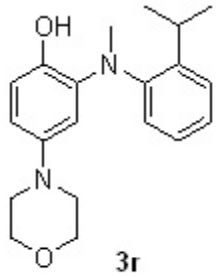

500 MHz, CDCl<sub>3</sub>

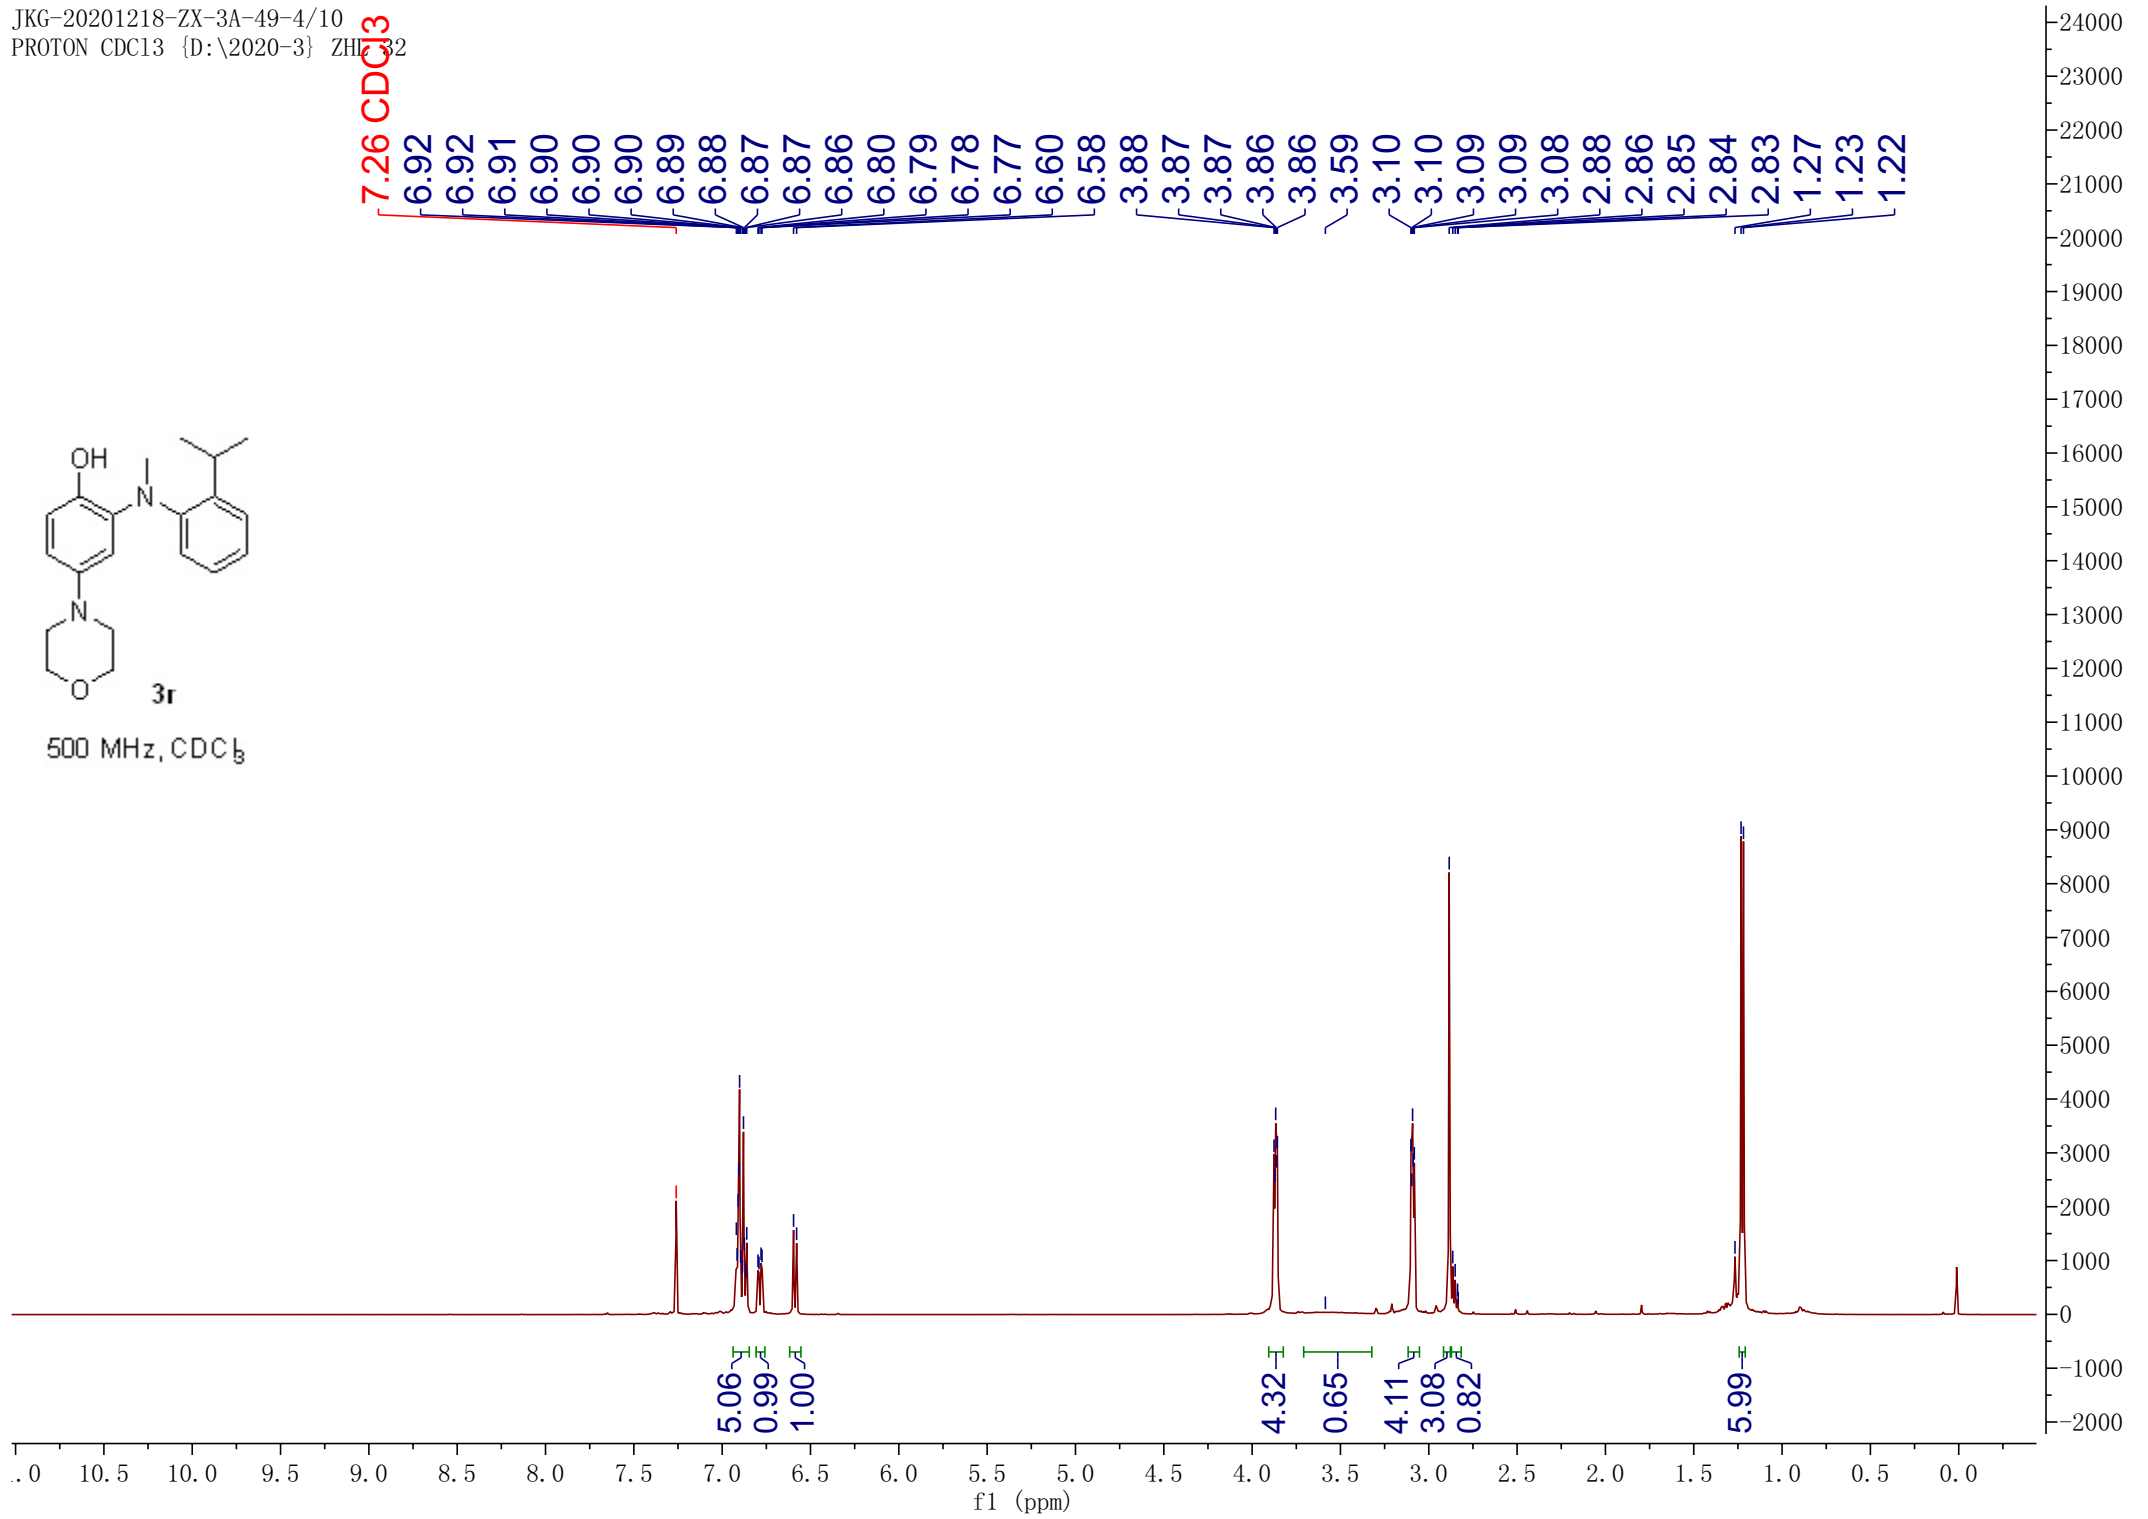

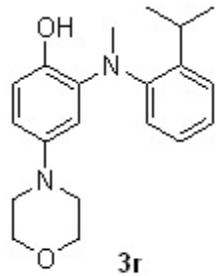

500 MHz, CDCl<sub>3</sub>

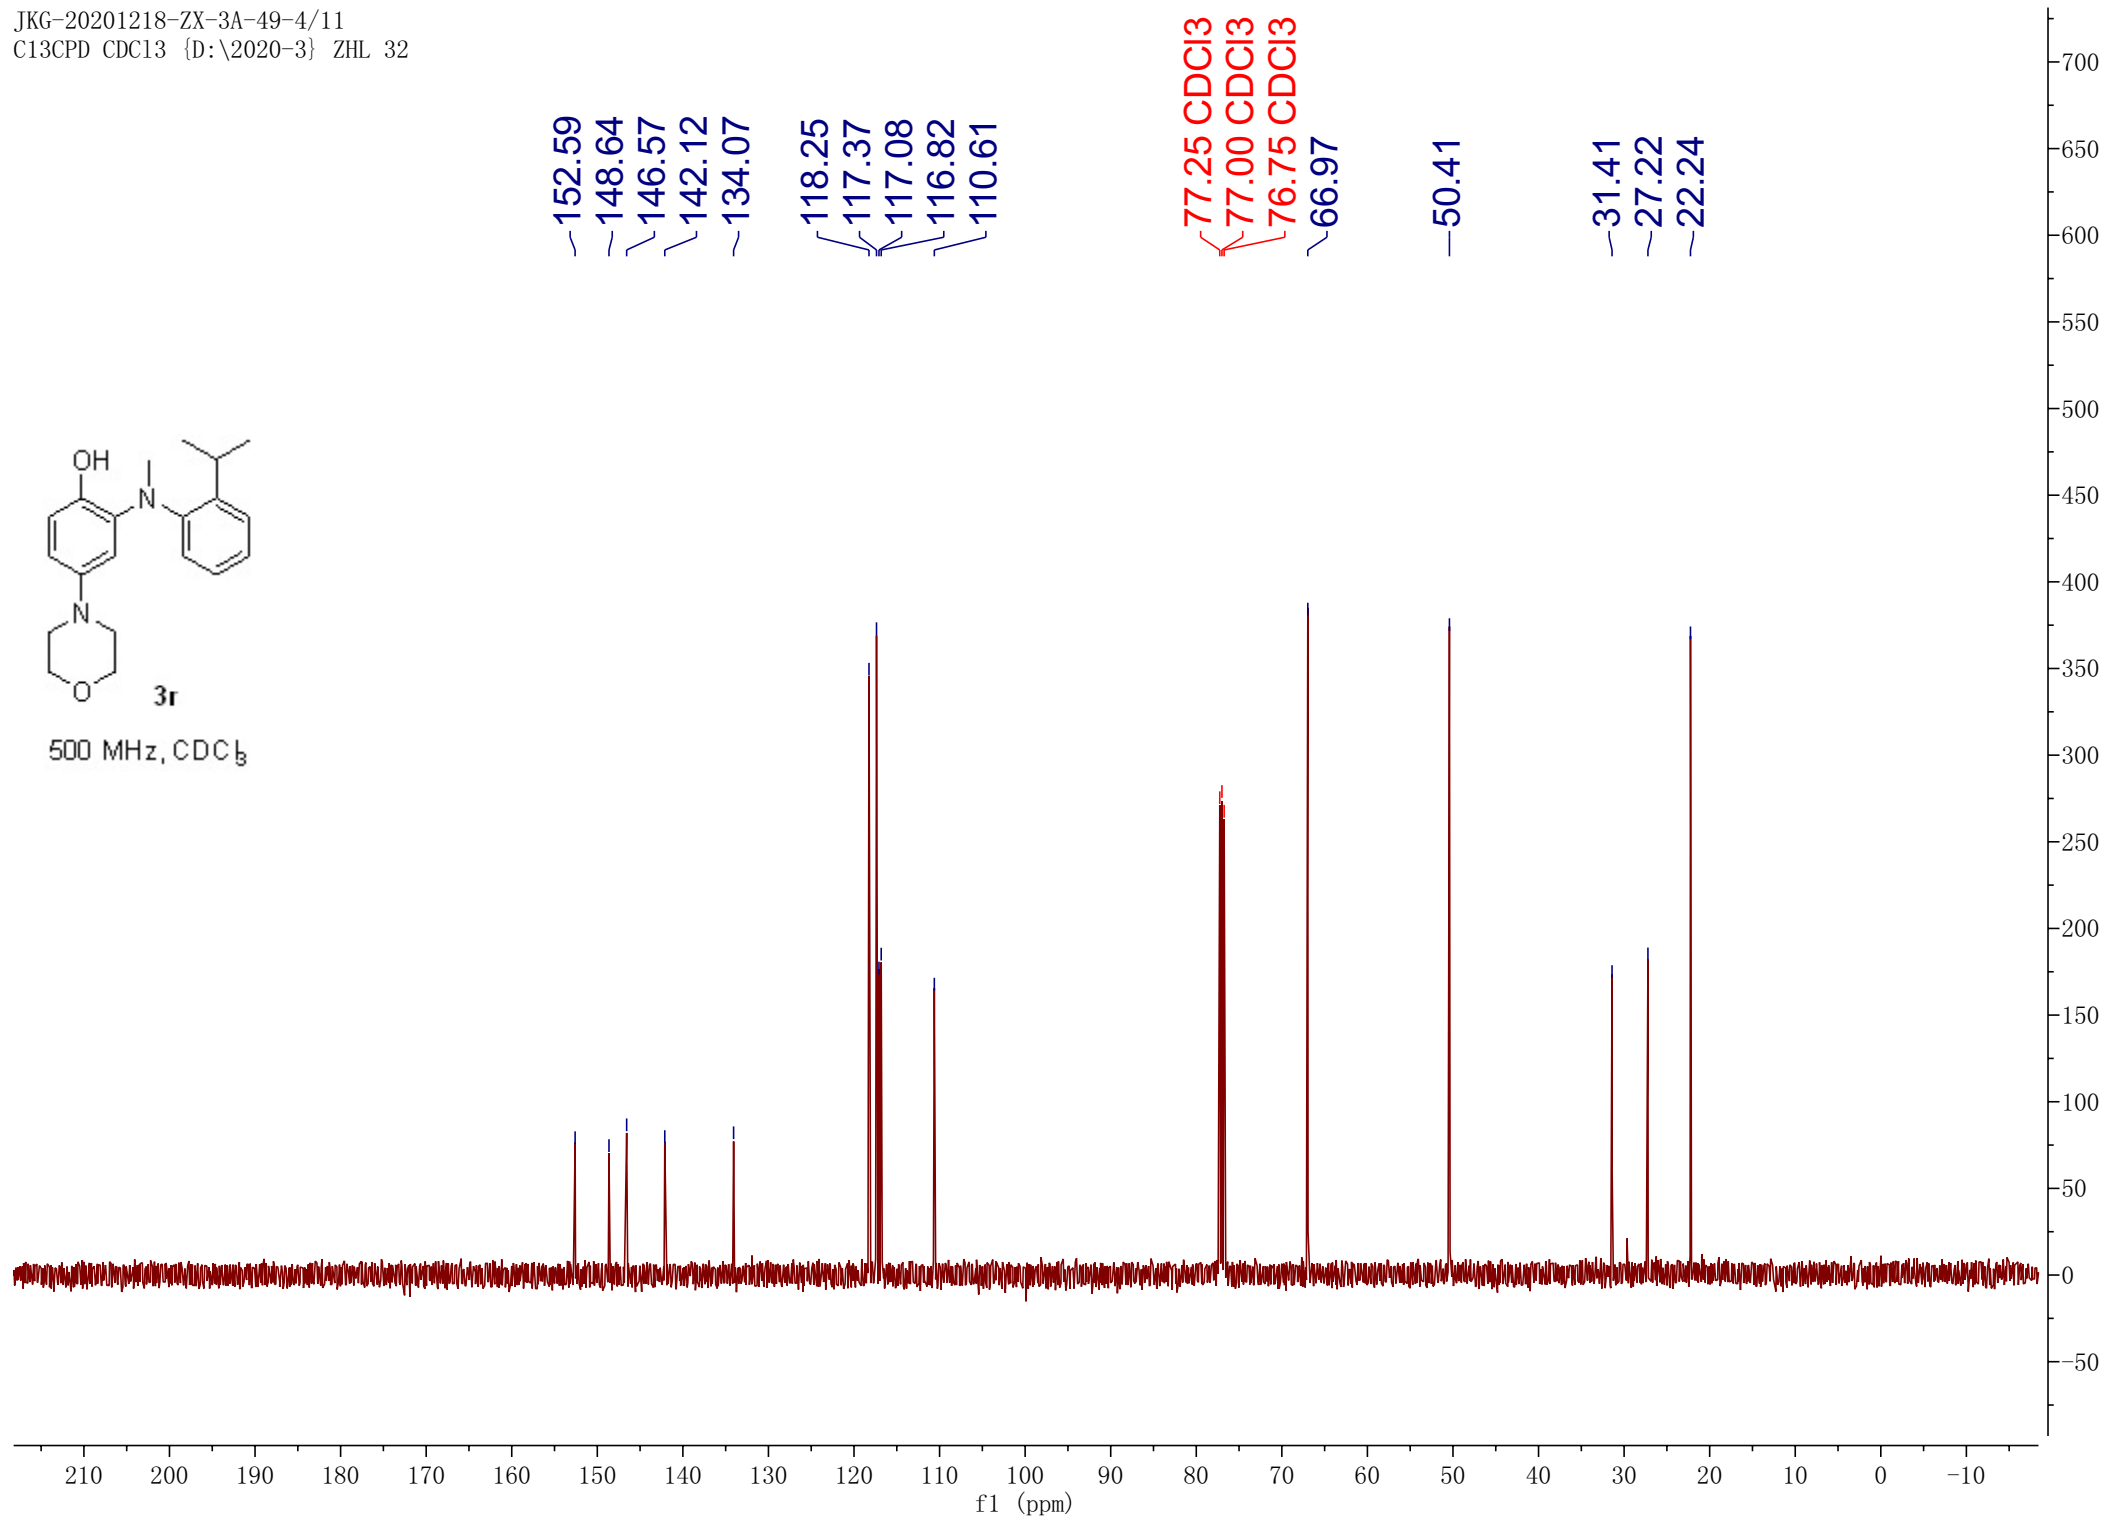

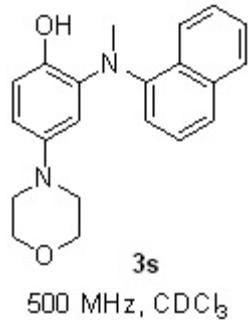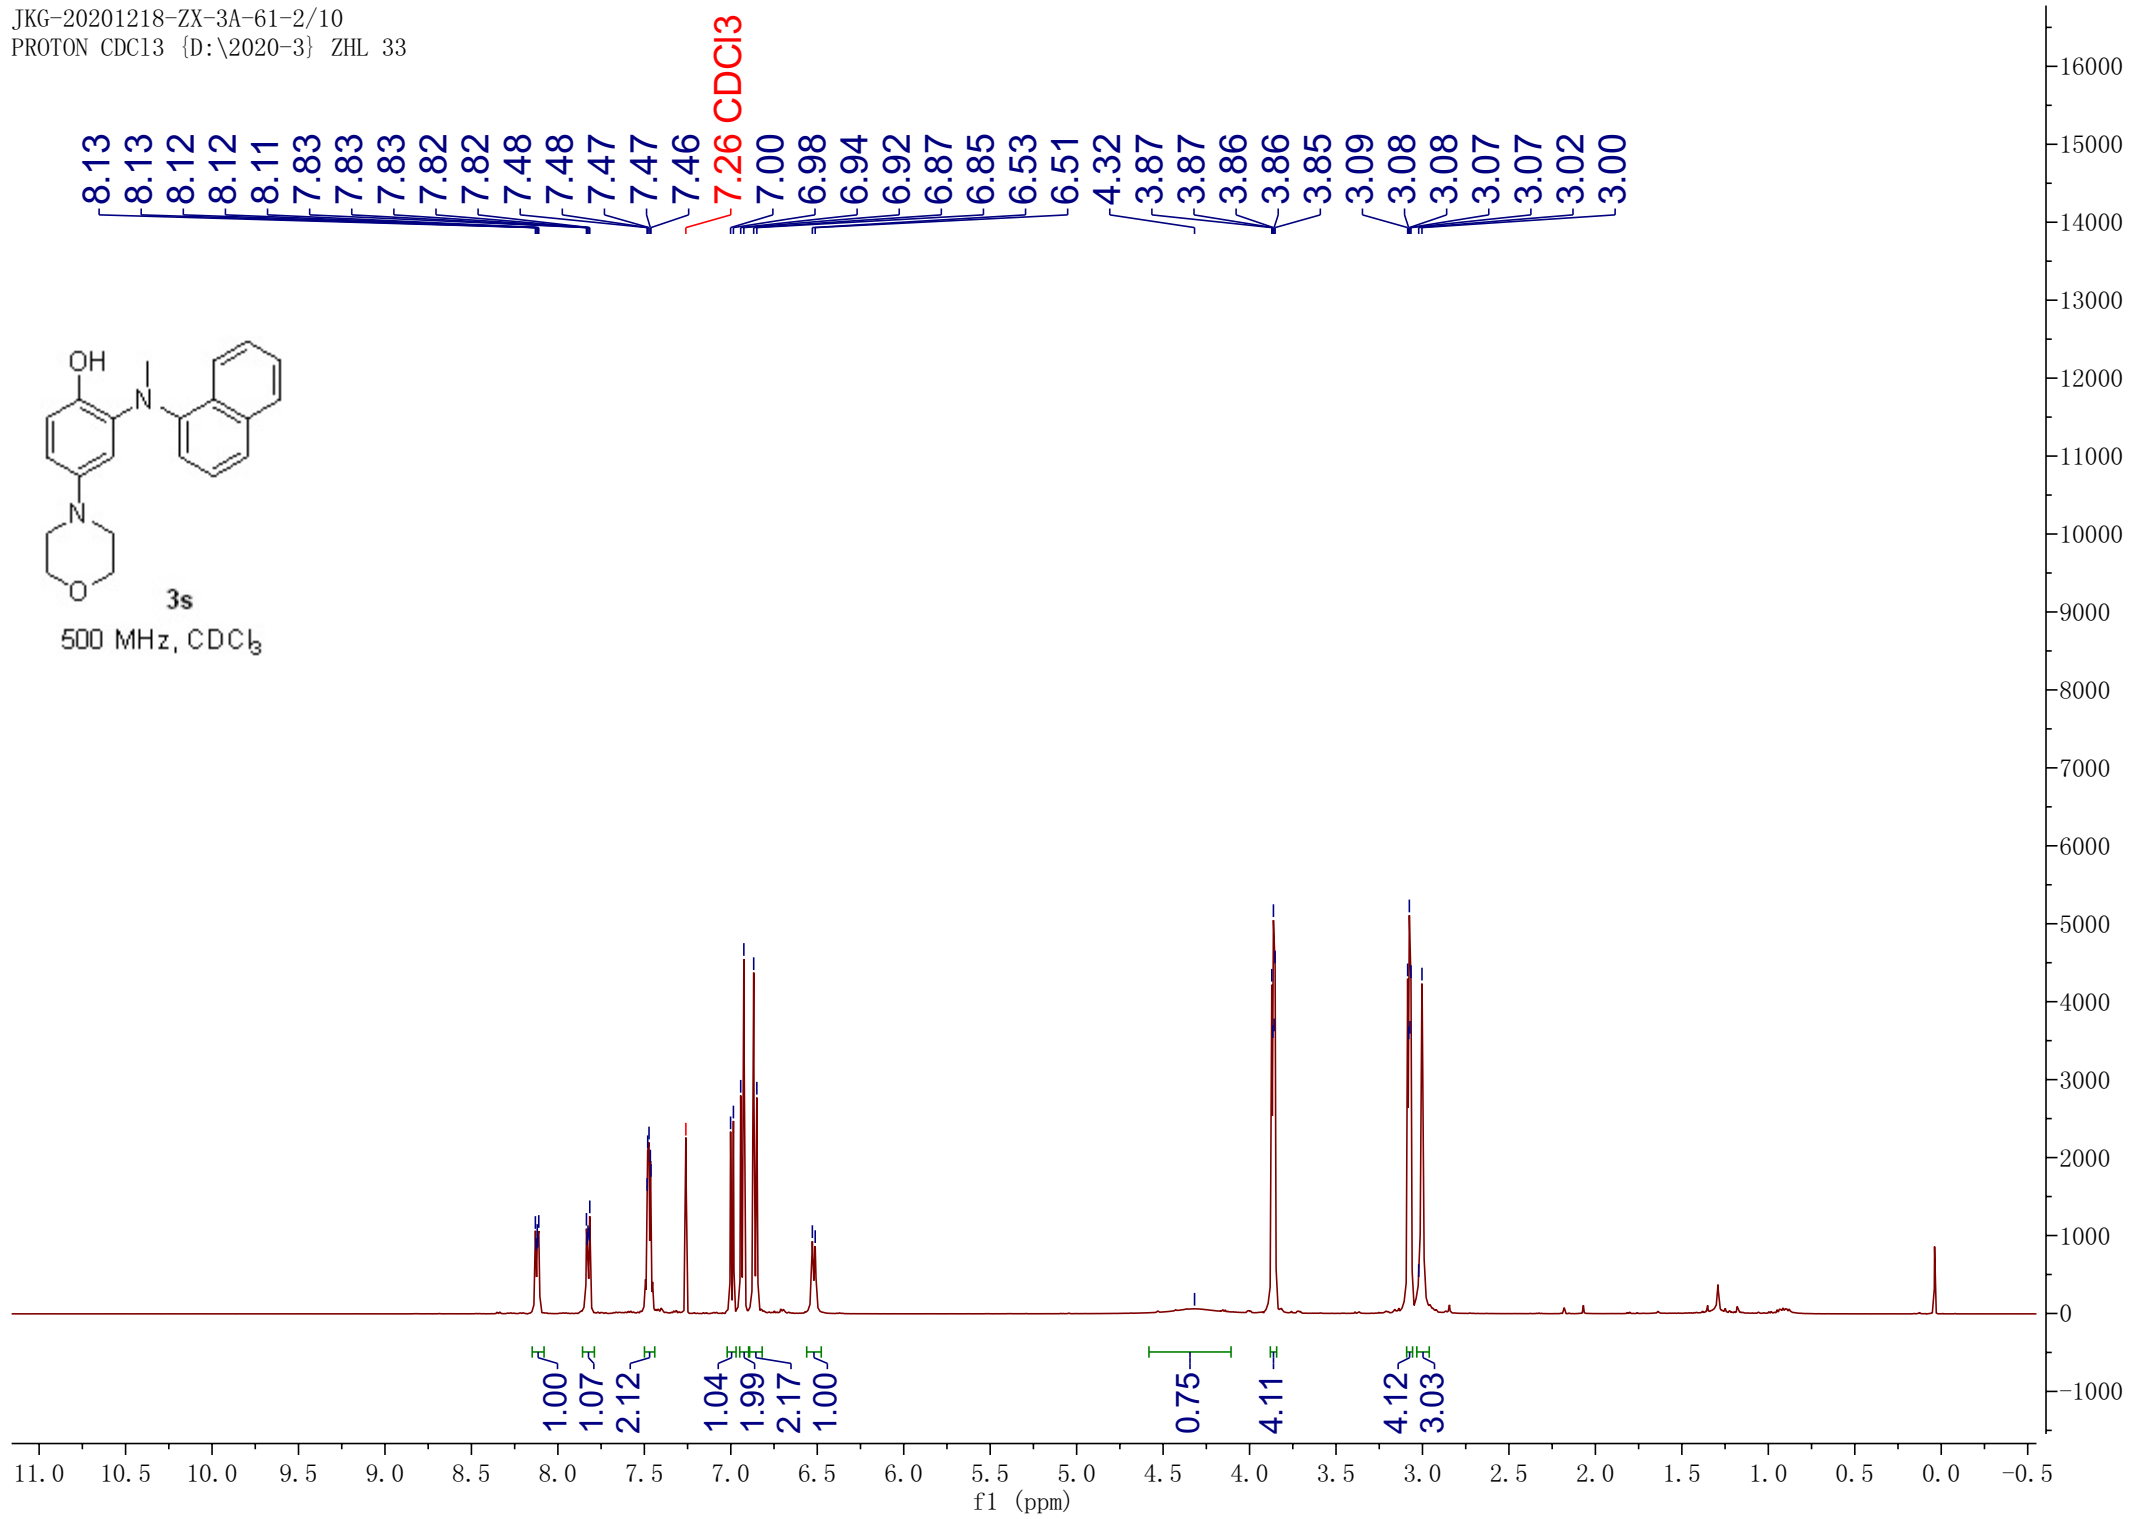

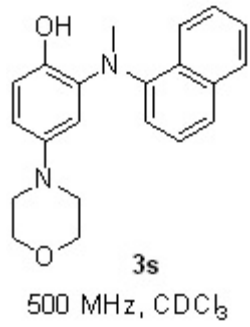

153.19  
146.51  
144.17  
141.16  
127.66  
125.82  
125.31  
124.45  
122.76  
120.11  
117.75  
117.39  
115.72  
-103.28

77.25 CDCI3  
77.00 CDCI3  
76.75 CDCI3  
66.91

-50.35

-31.17

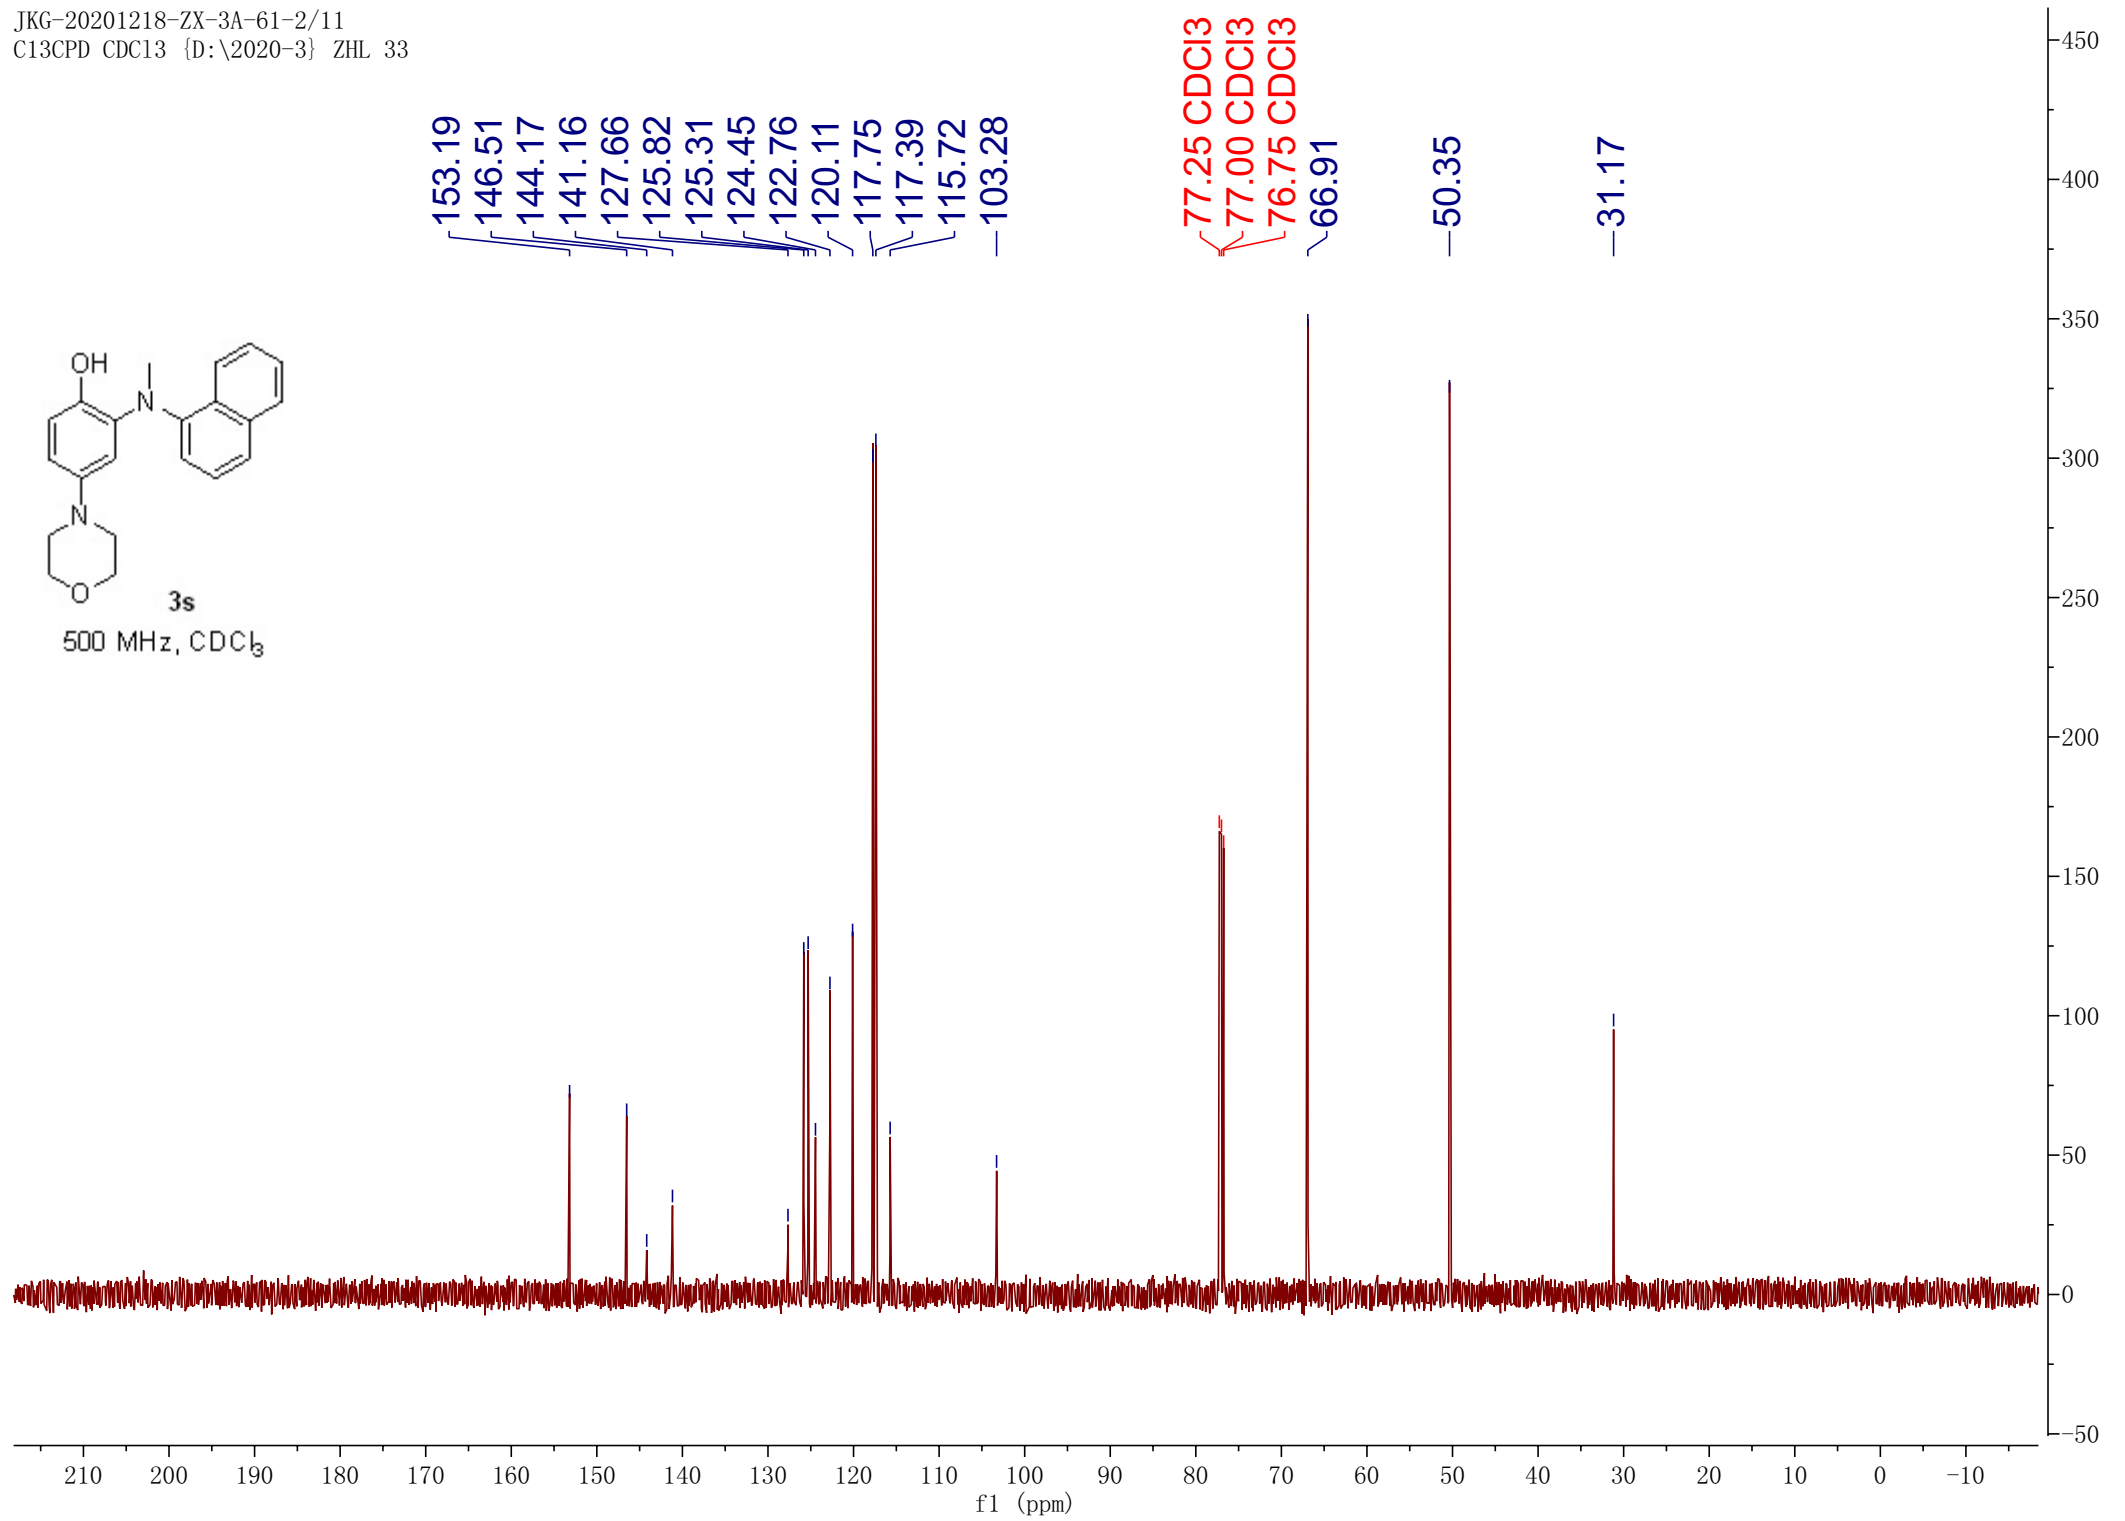

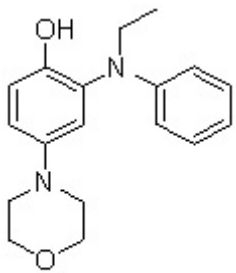

3t

400 MHz, CD<sub>3</sub>OD

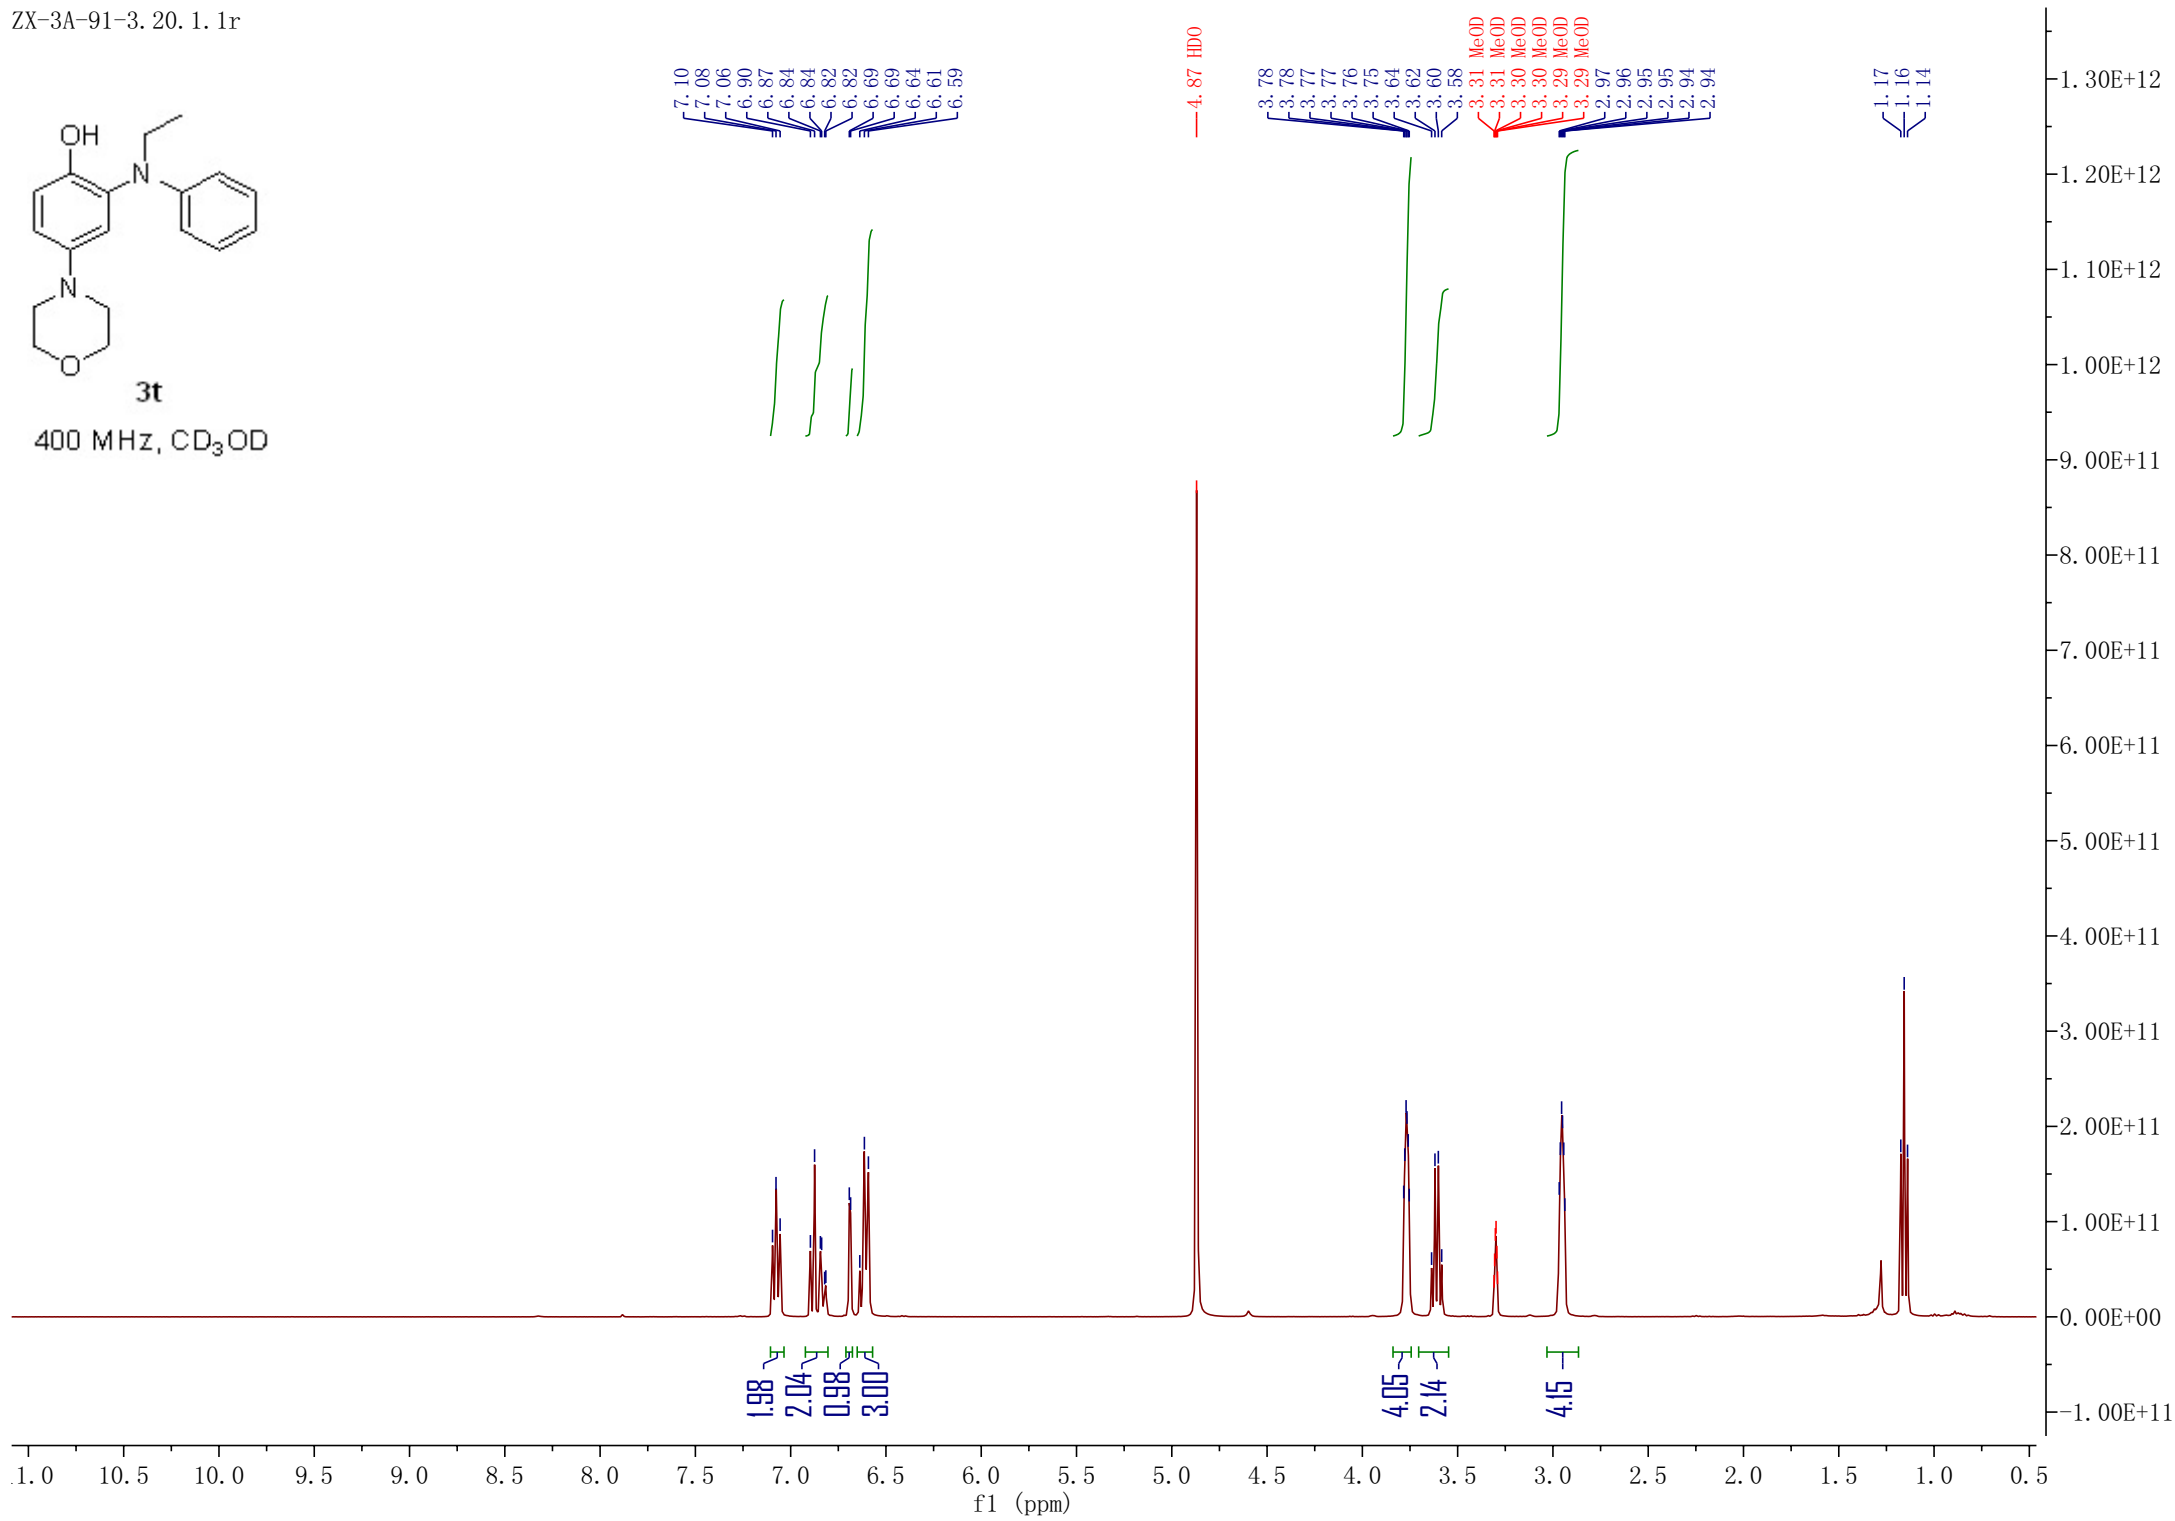

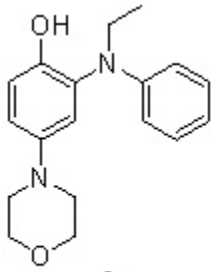

3t

500 MHz, CDCl<sub>3</sub>

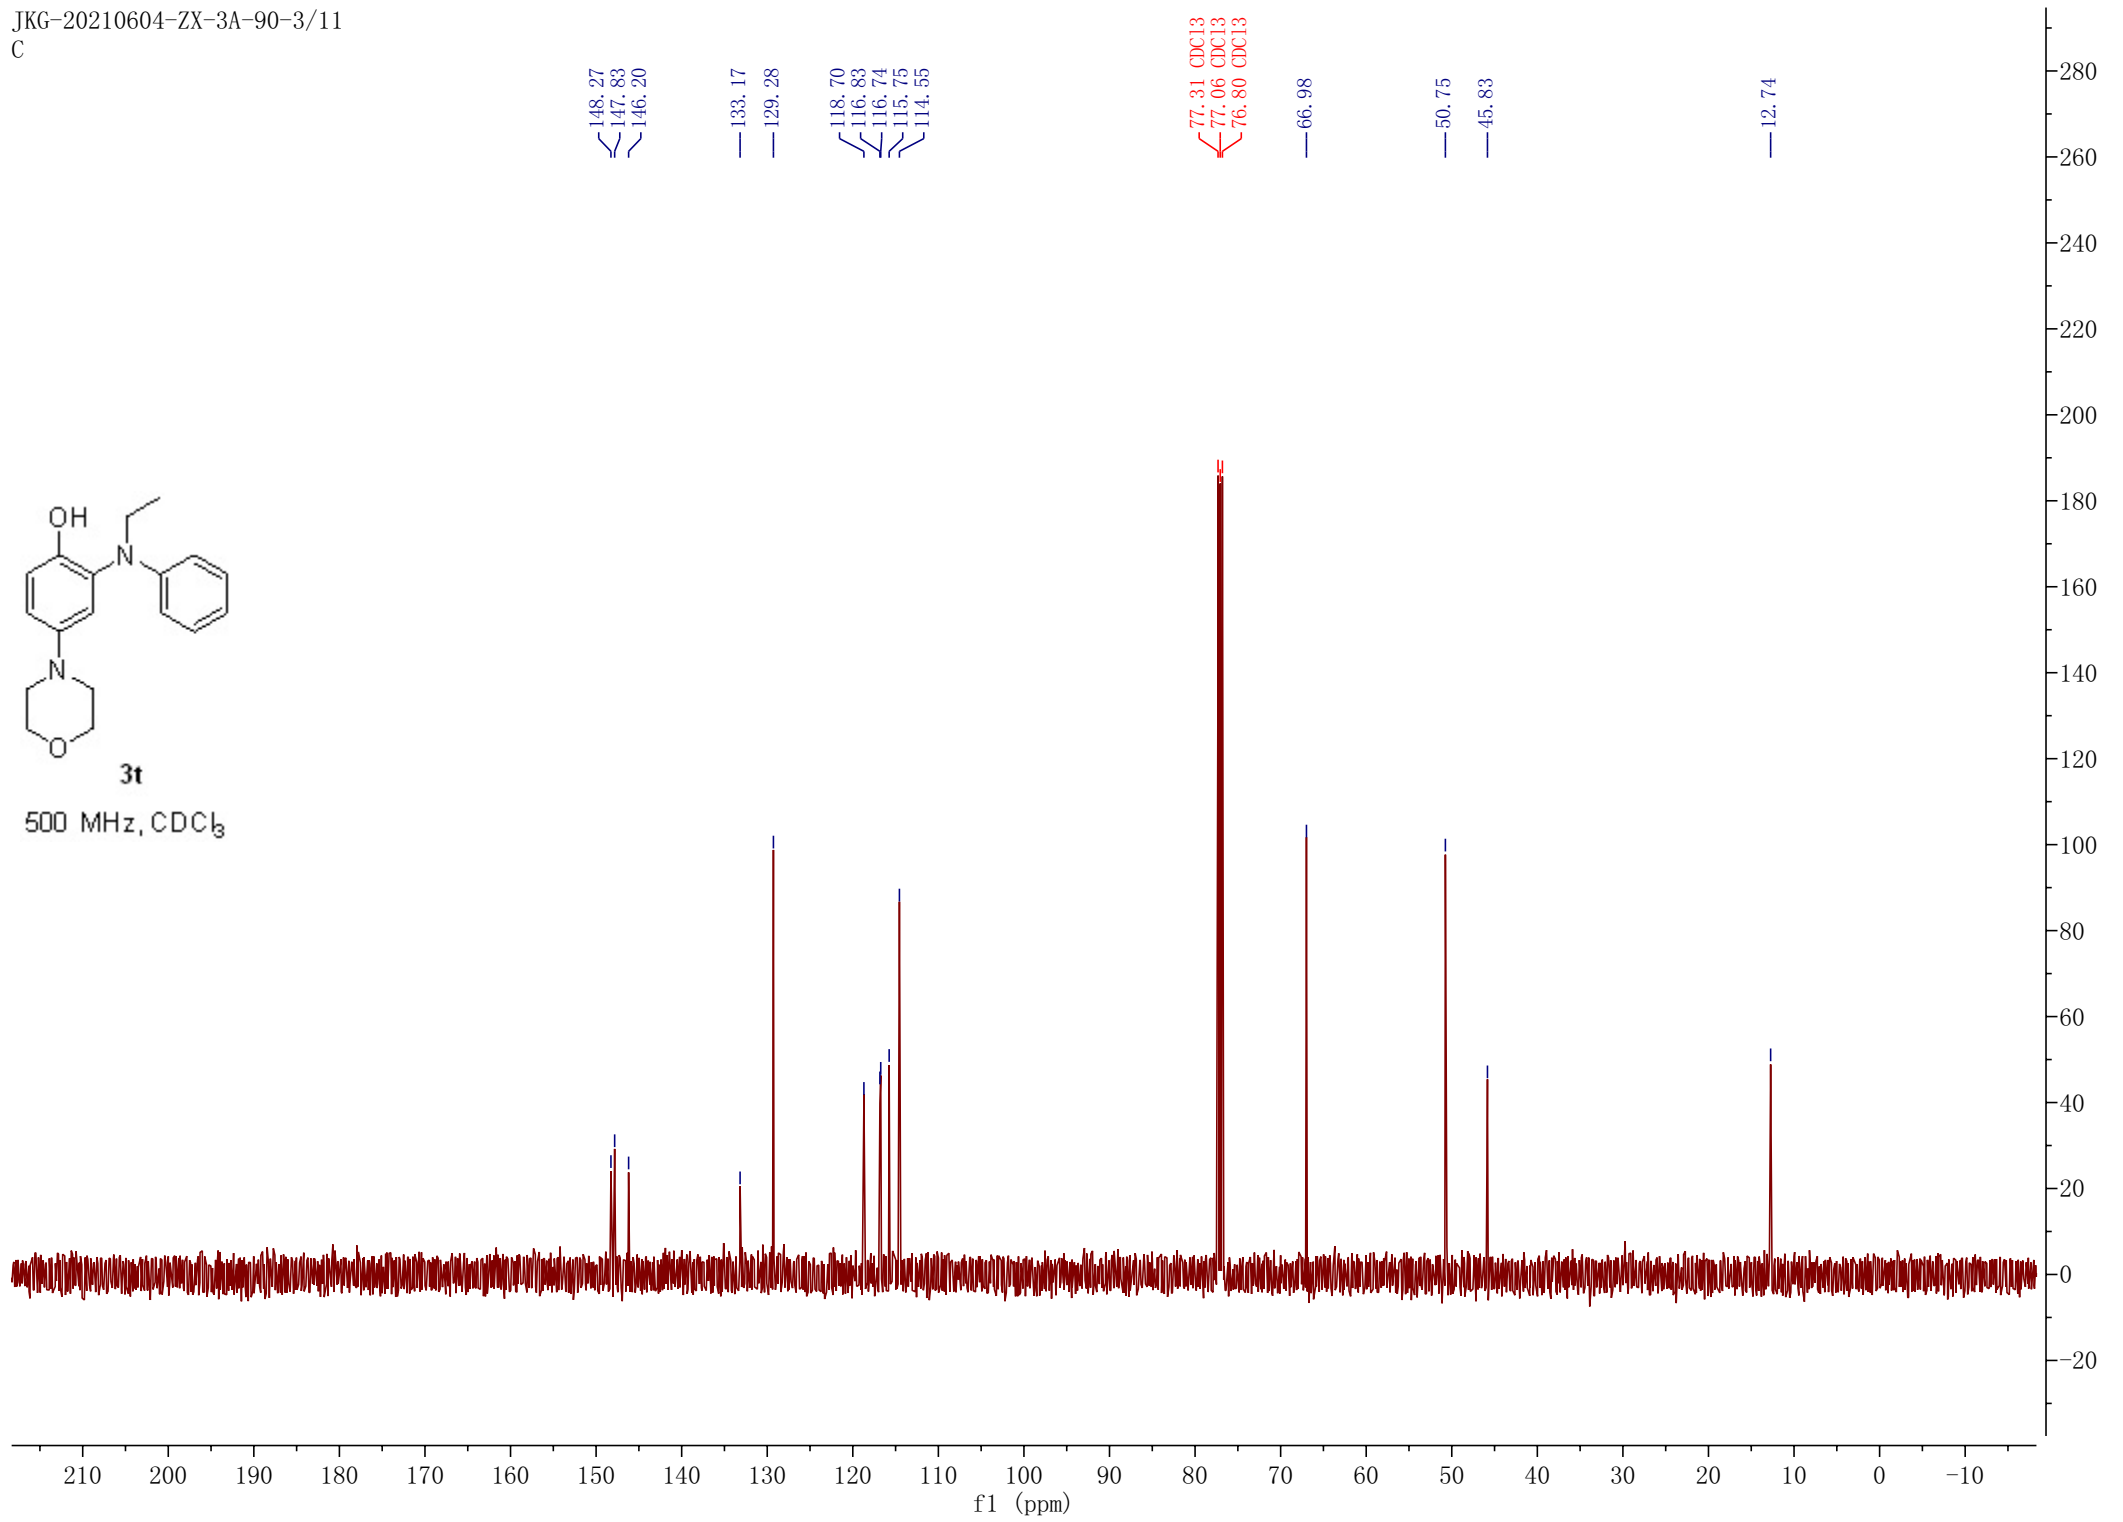

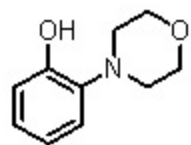**4a**CDCl<sub>3</sub> 400 MHz7.26 CDCl<sub>3</sub>7.18  
7.18  
7.16  
7.16  
7.11  
7.11  
7.10  
7.09  
7.08  
7.07  
6.98  
6.97  
6.95  
6.95  
6.91  
6.90  
6.89  
6.88  
6.87  
6.863.88  
3.87  
3.86  
3.862.90  
2.89  
2.88  
2.88  
2.87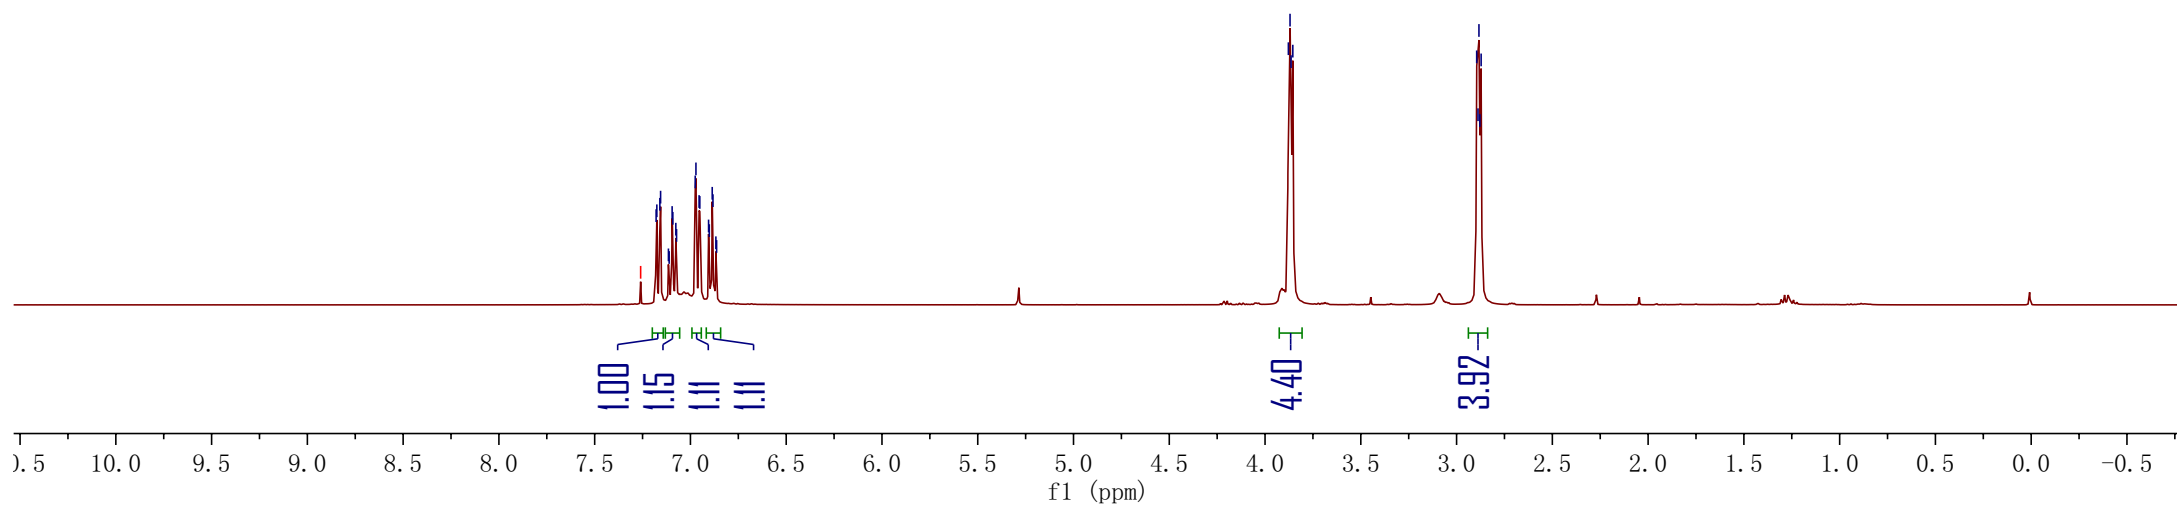

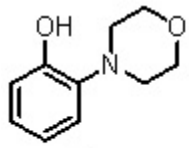**4a**CDCl<sub>3</sub> 400 MHz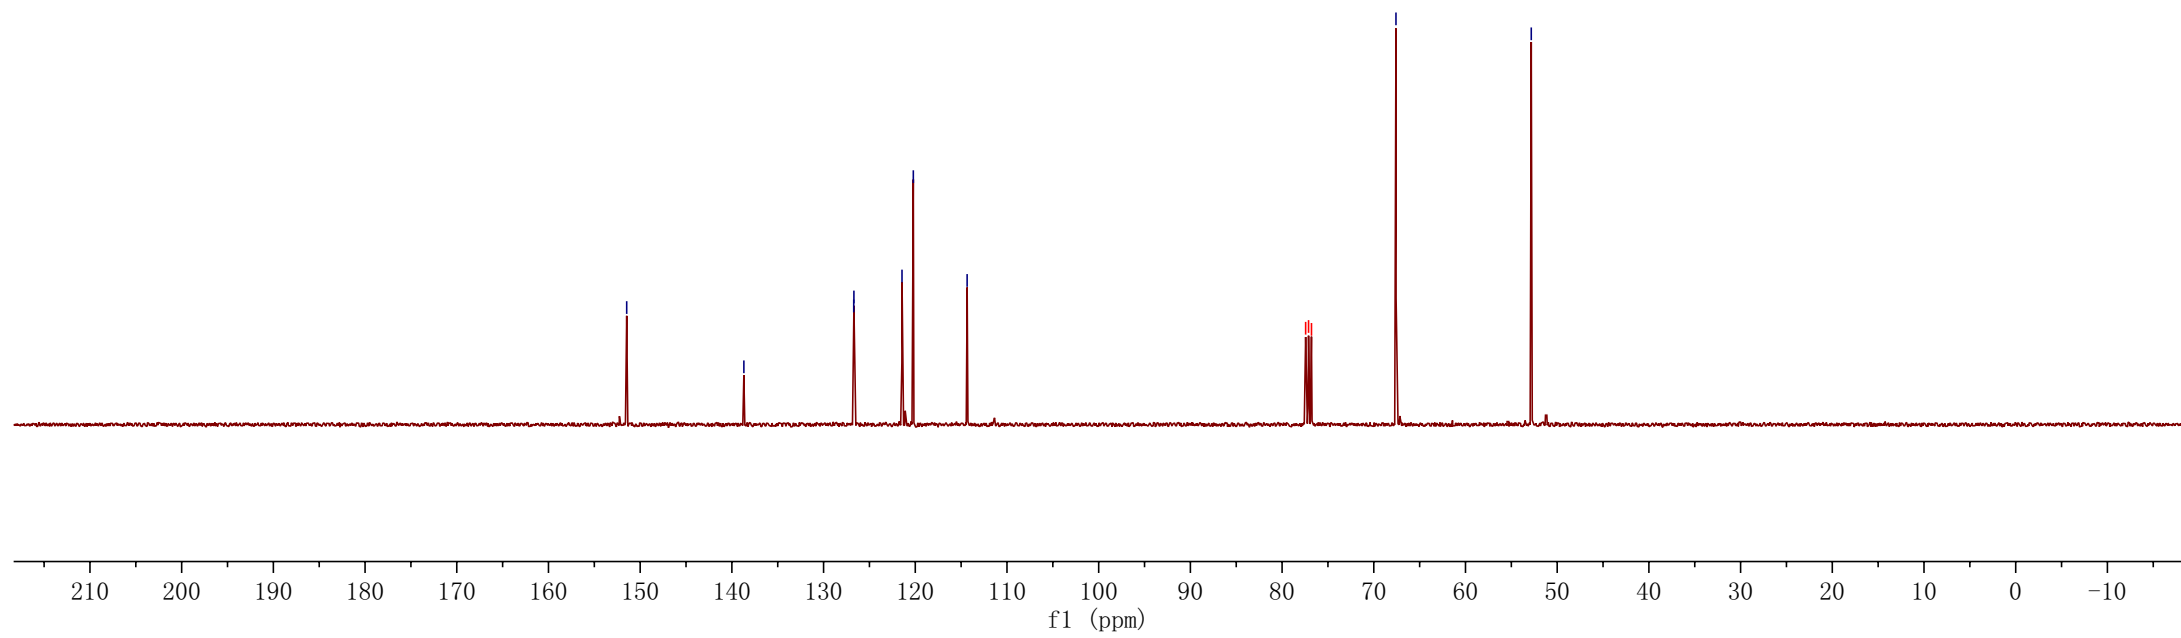



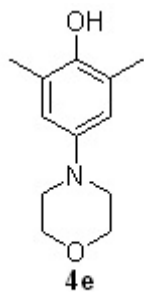

500 MHz CD<sub>3</sub>OD

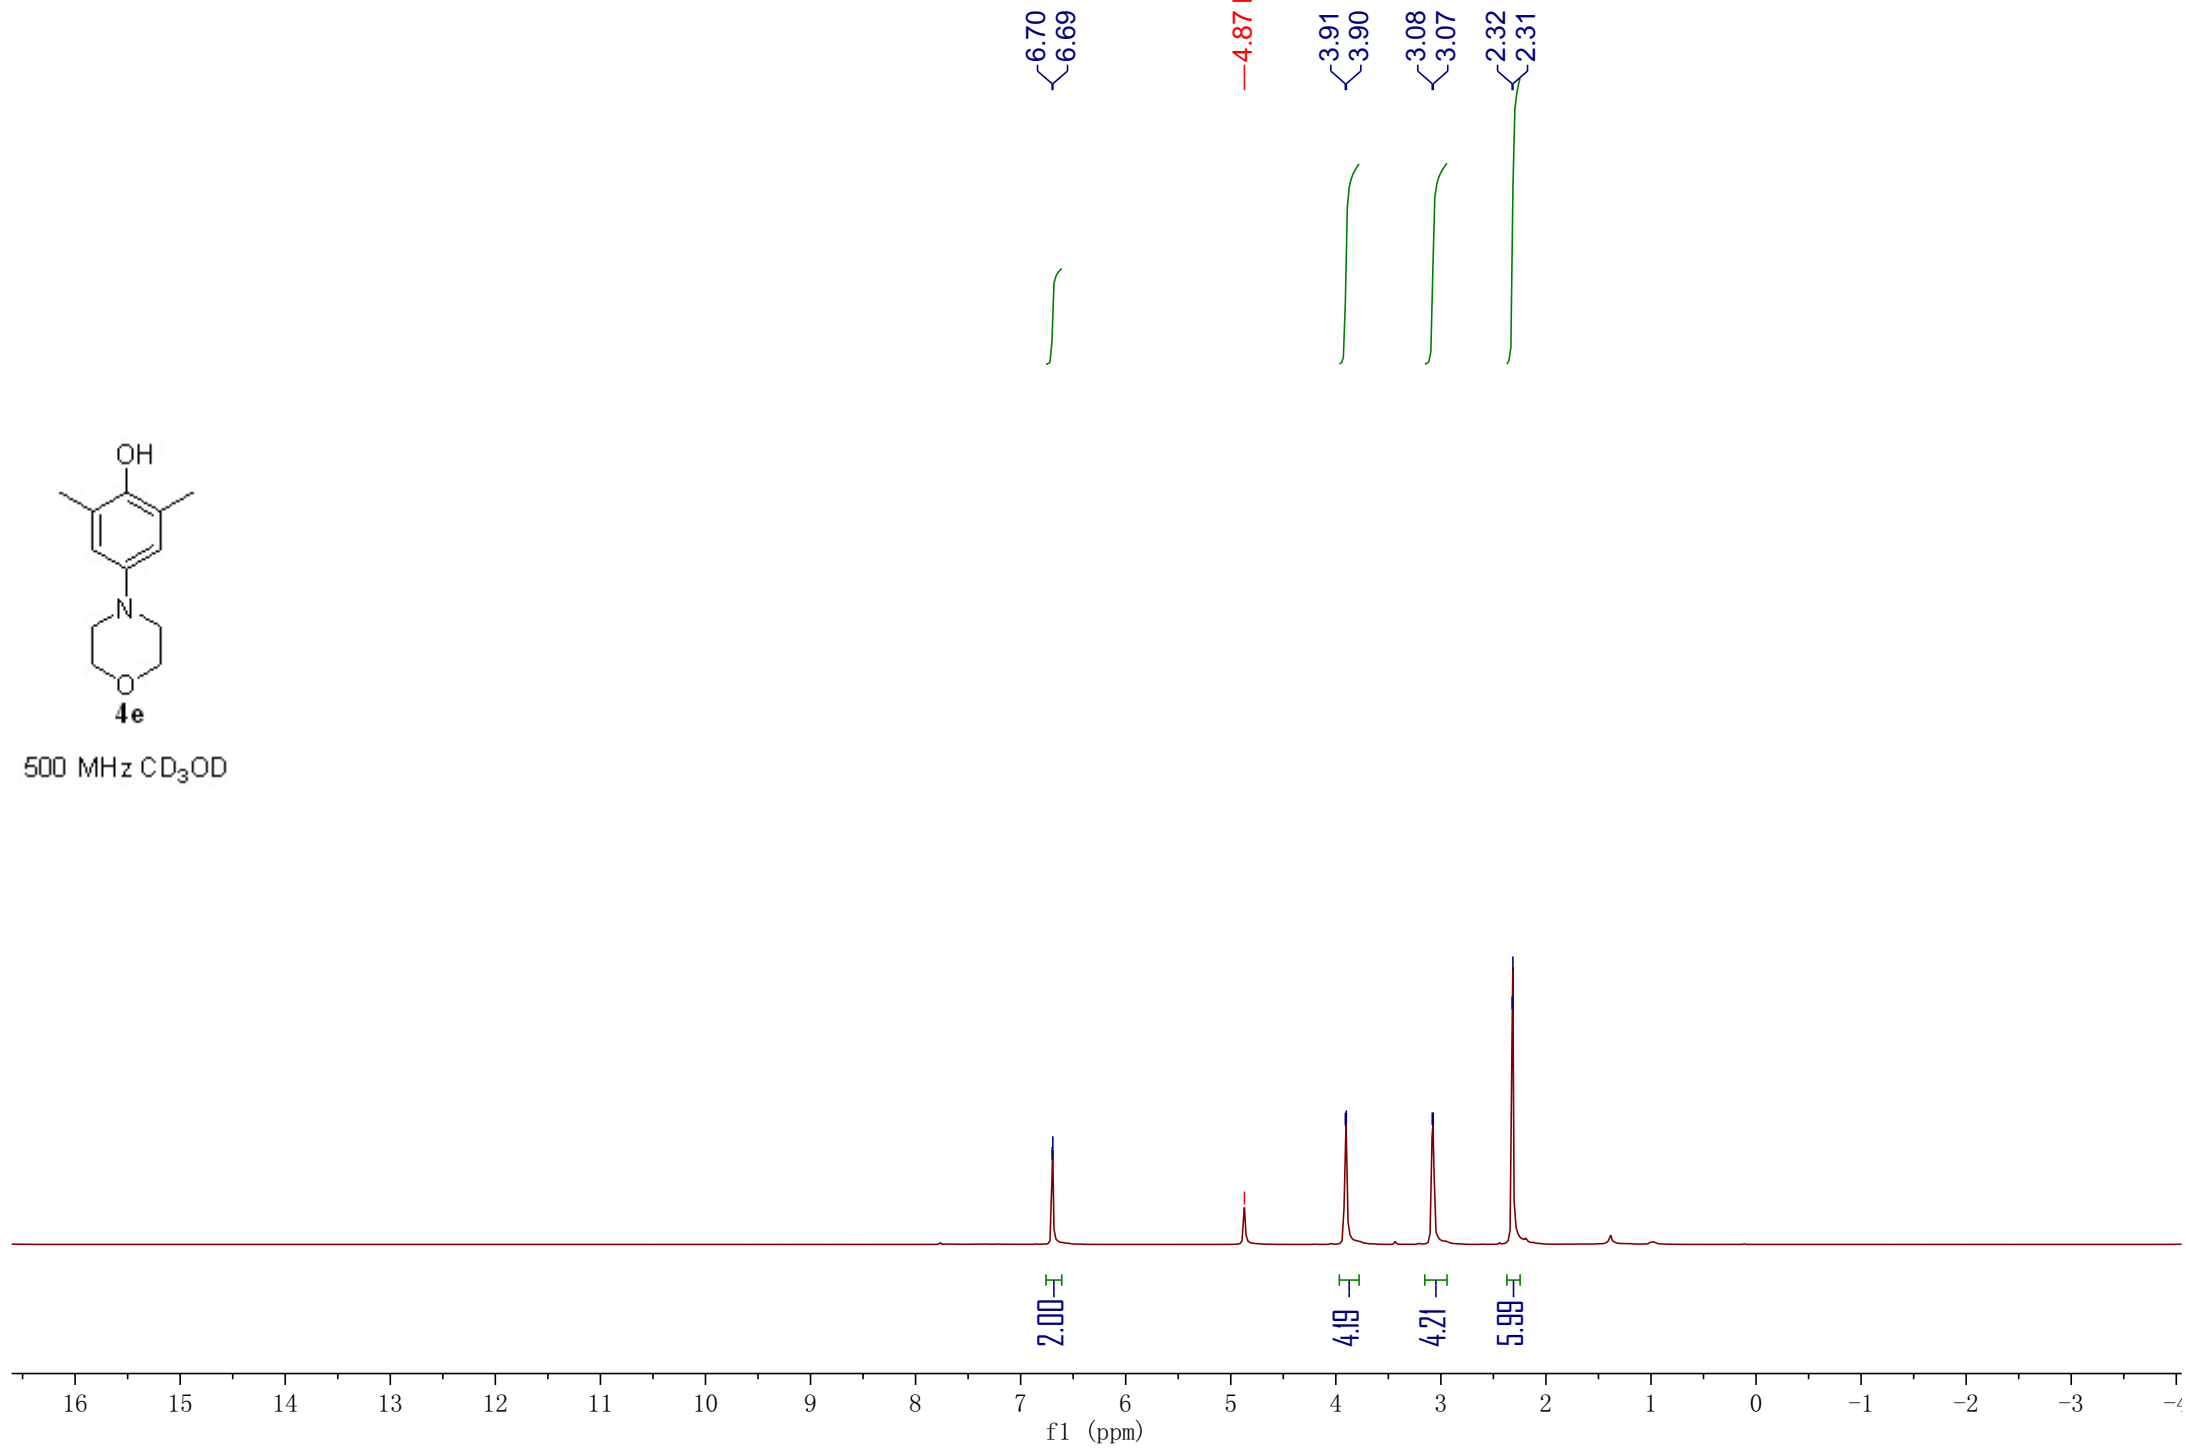

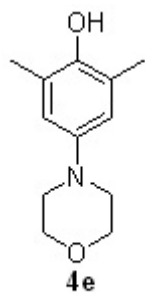500 MHz CD<sub>3</sub>OD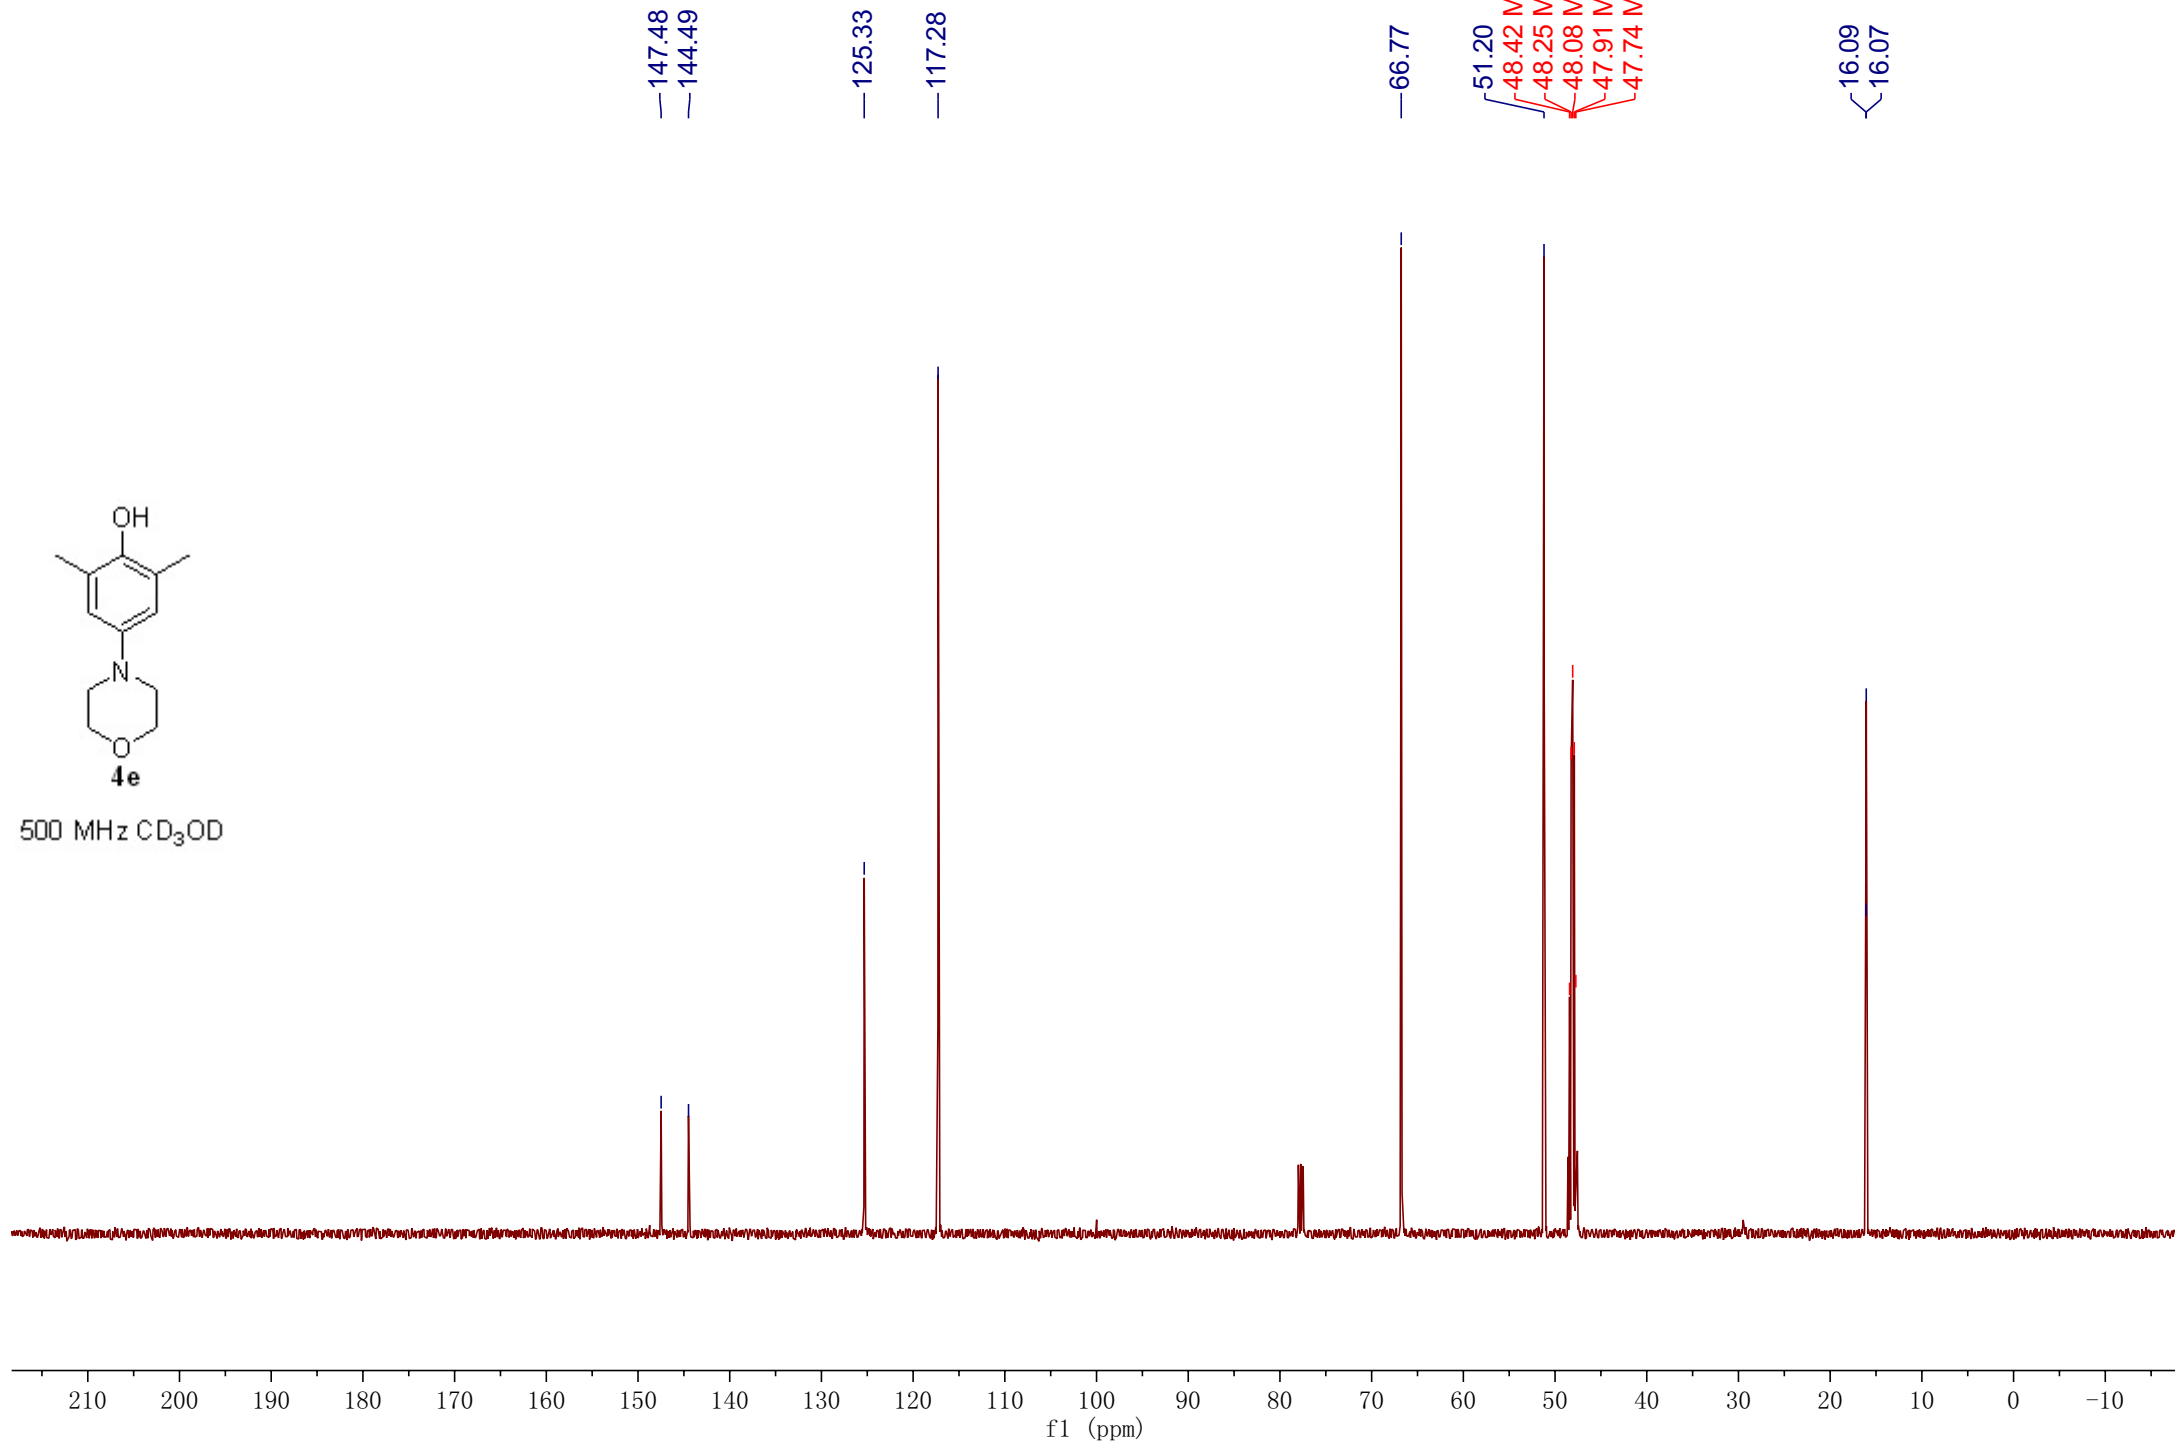

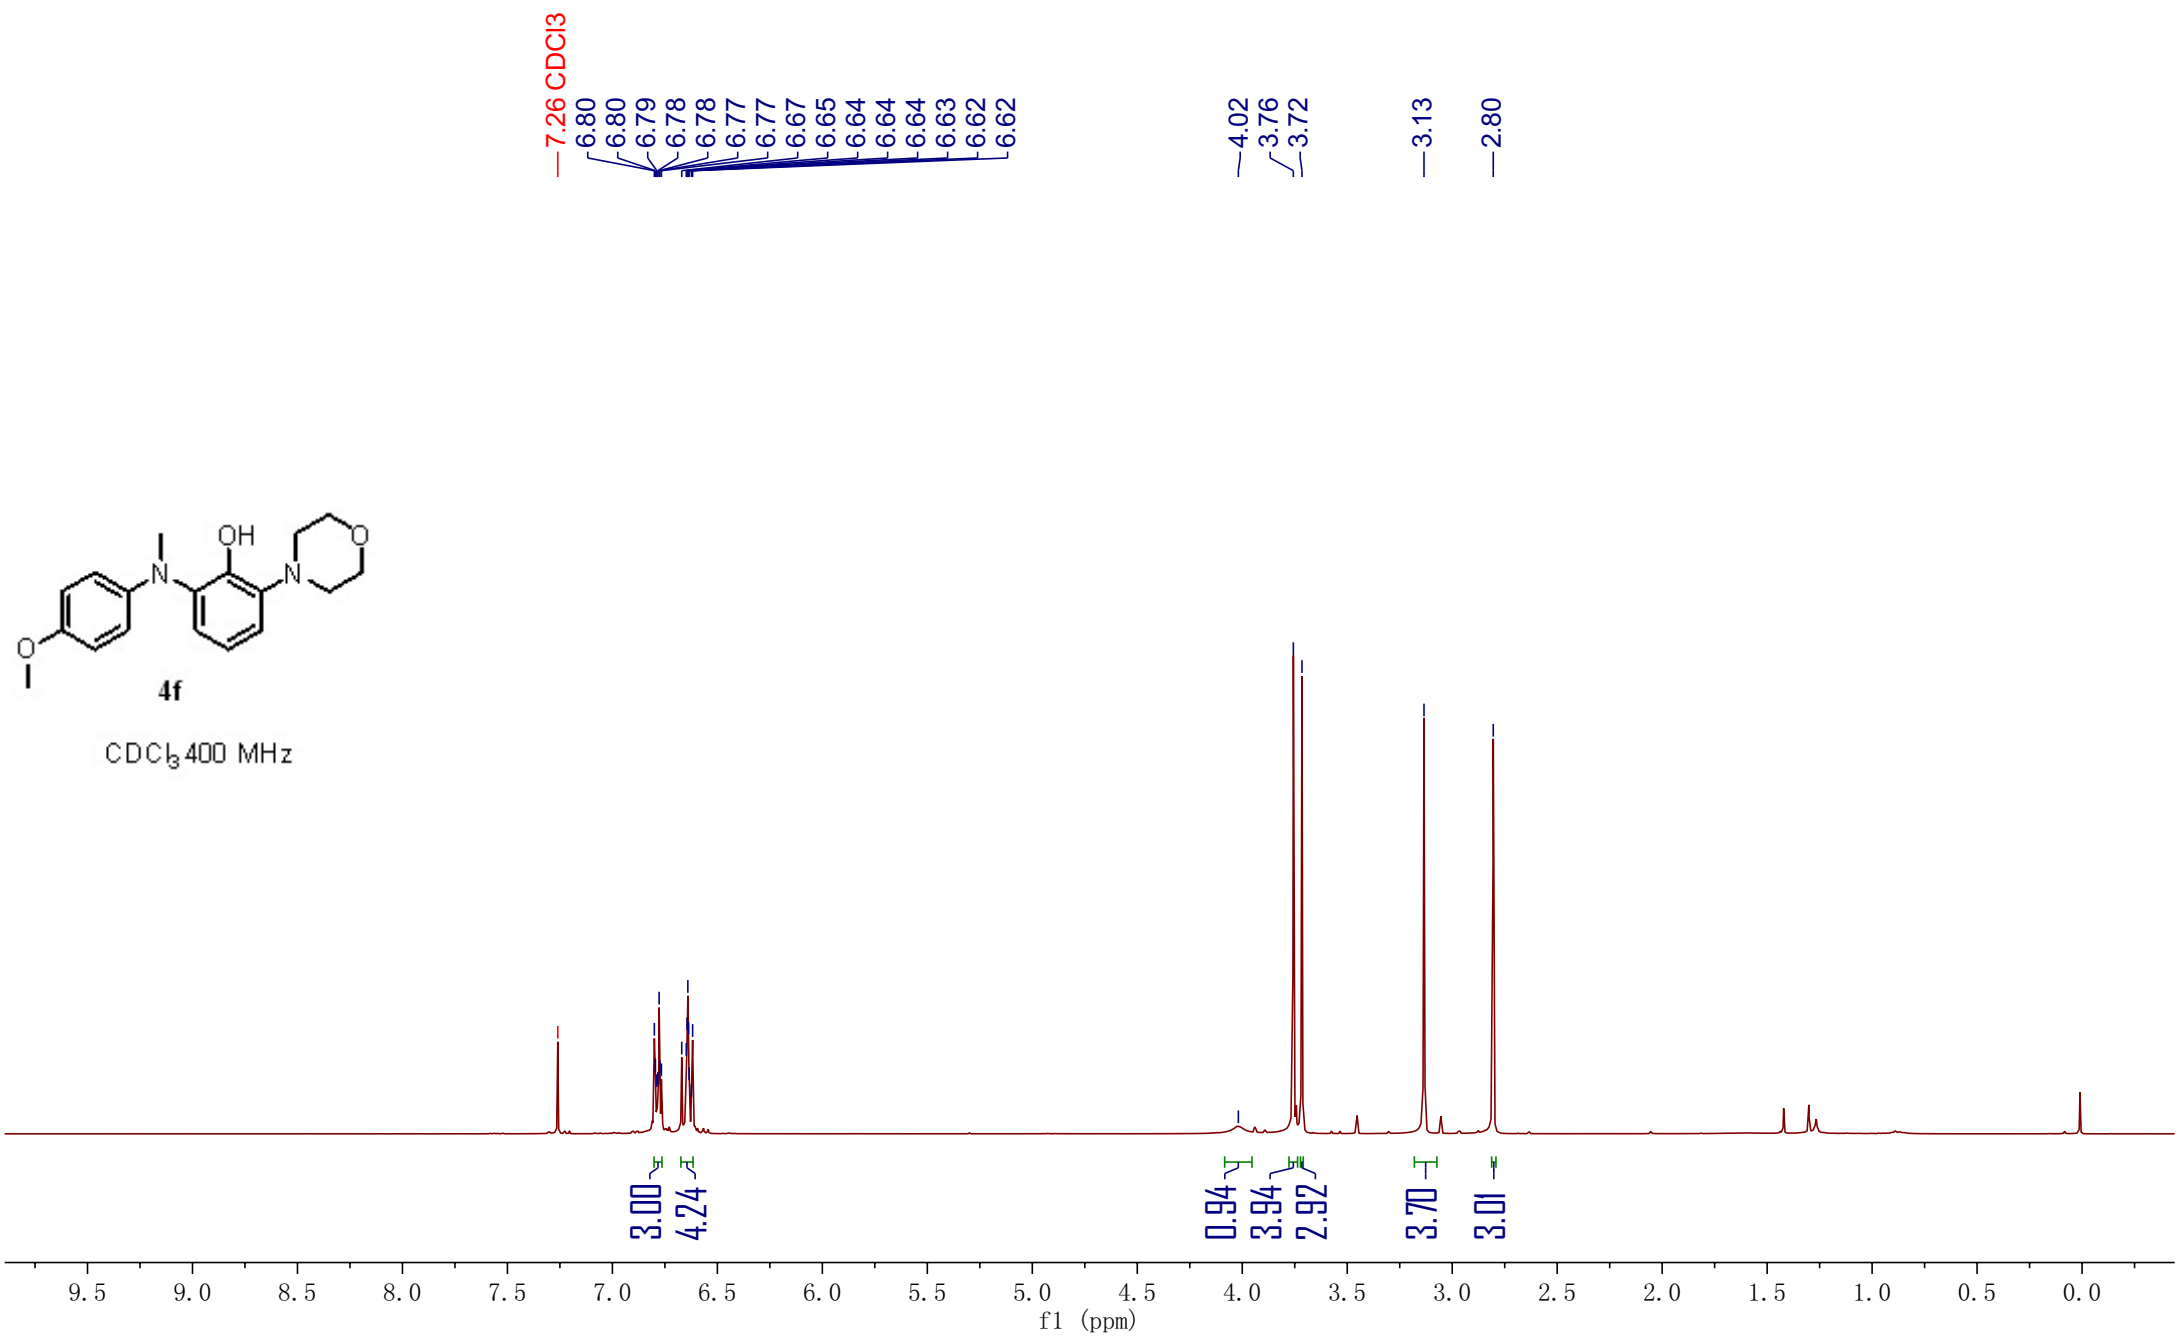

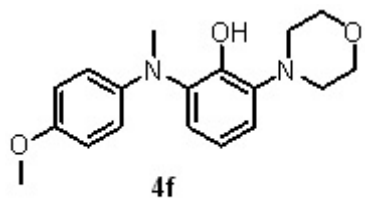

CDCl<sub>3</sub> 400 MHz

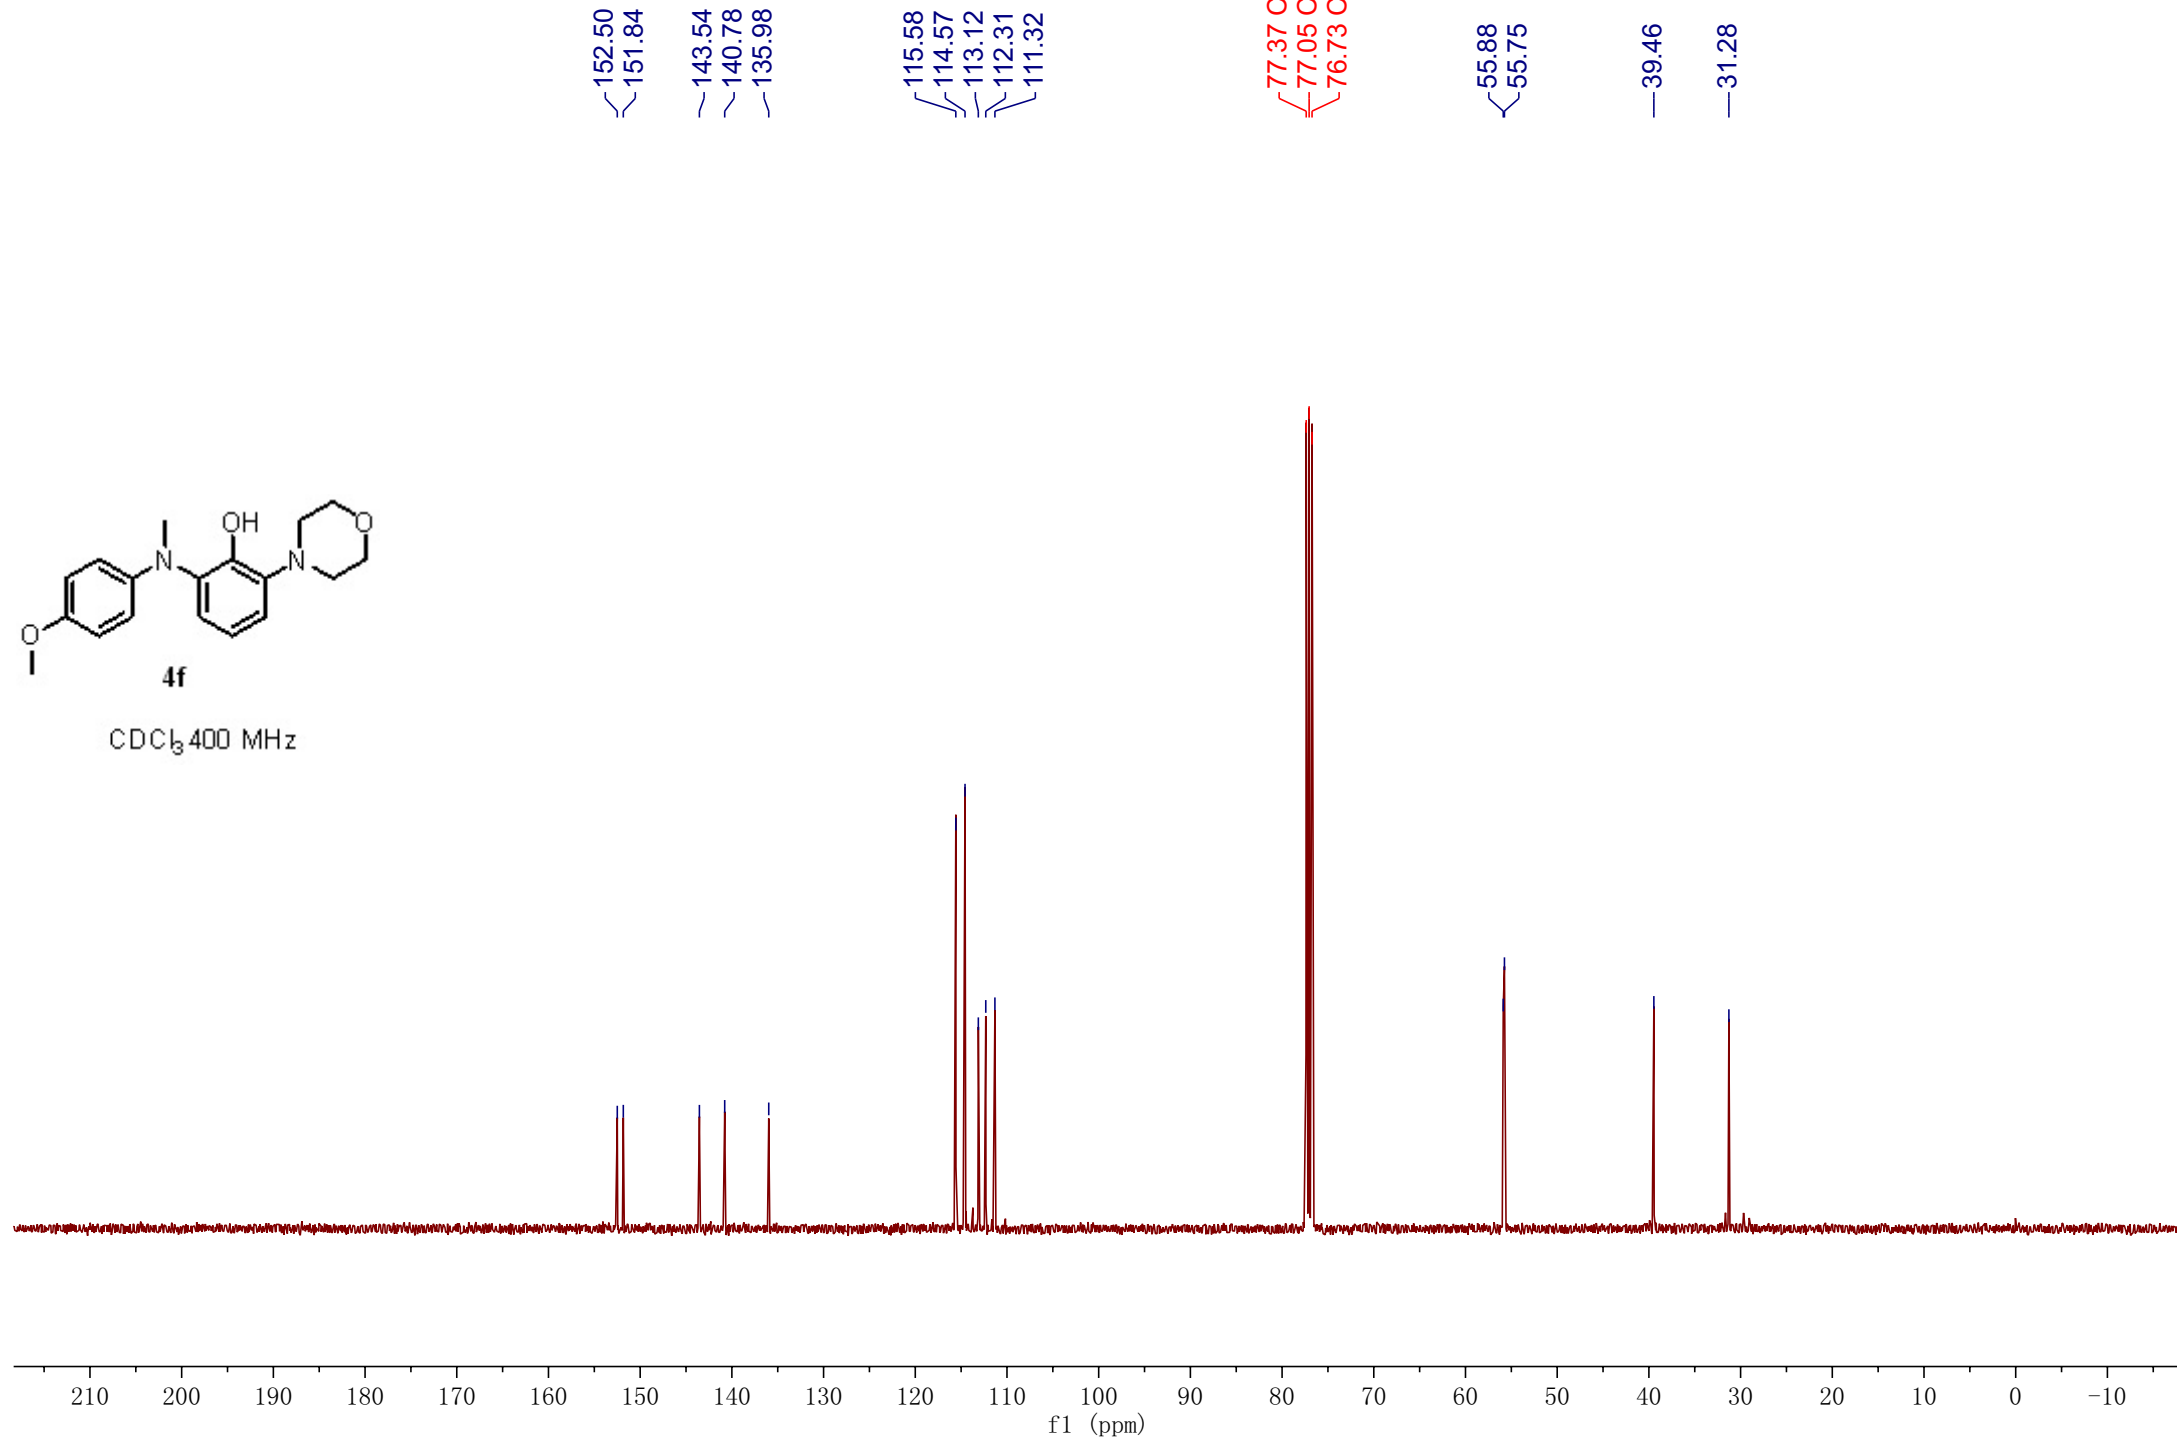

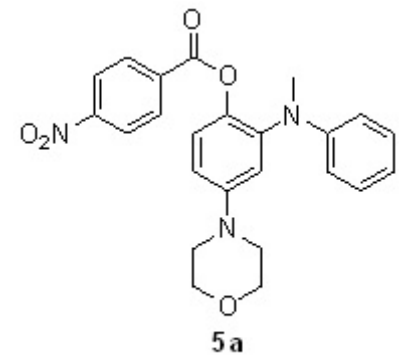

400 MHz, CDCl<sub>3</sub>

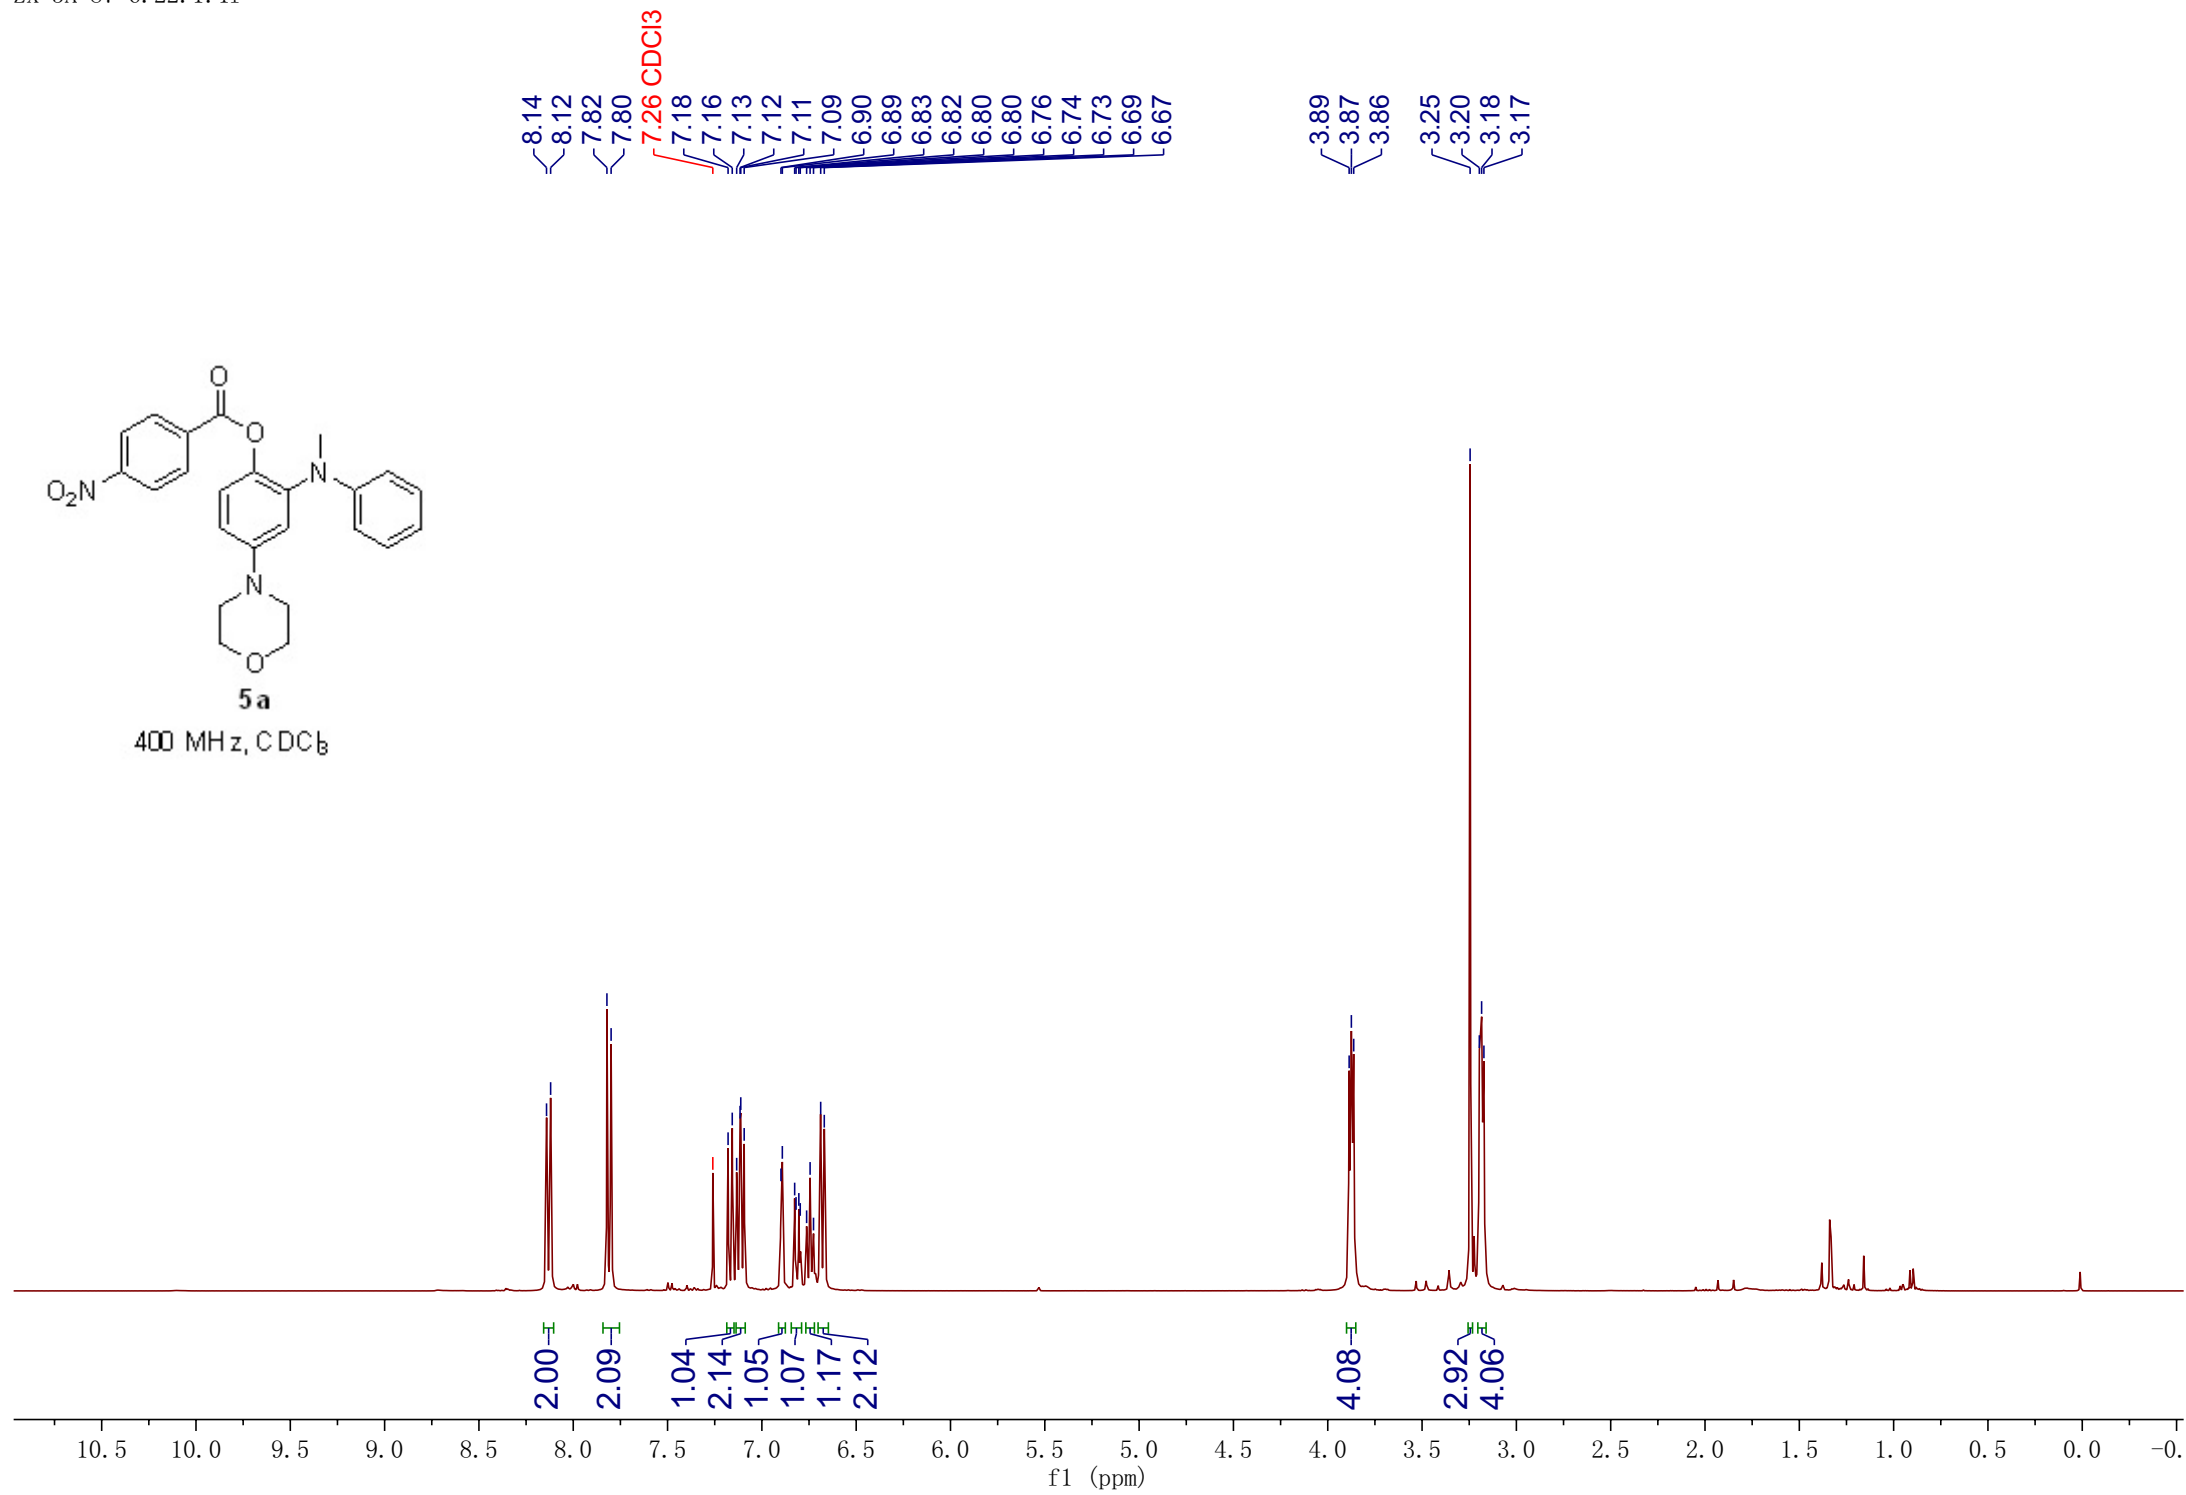

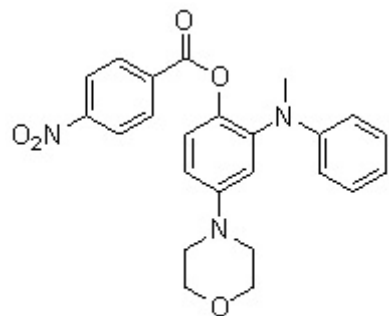

5a

400 MHz, CDCl<sub>3</sub>

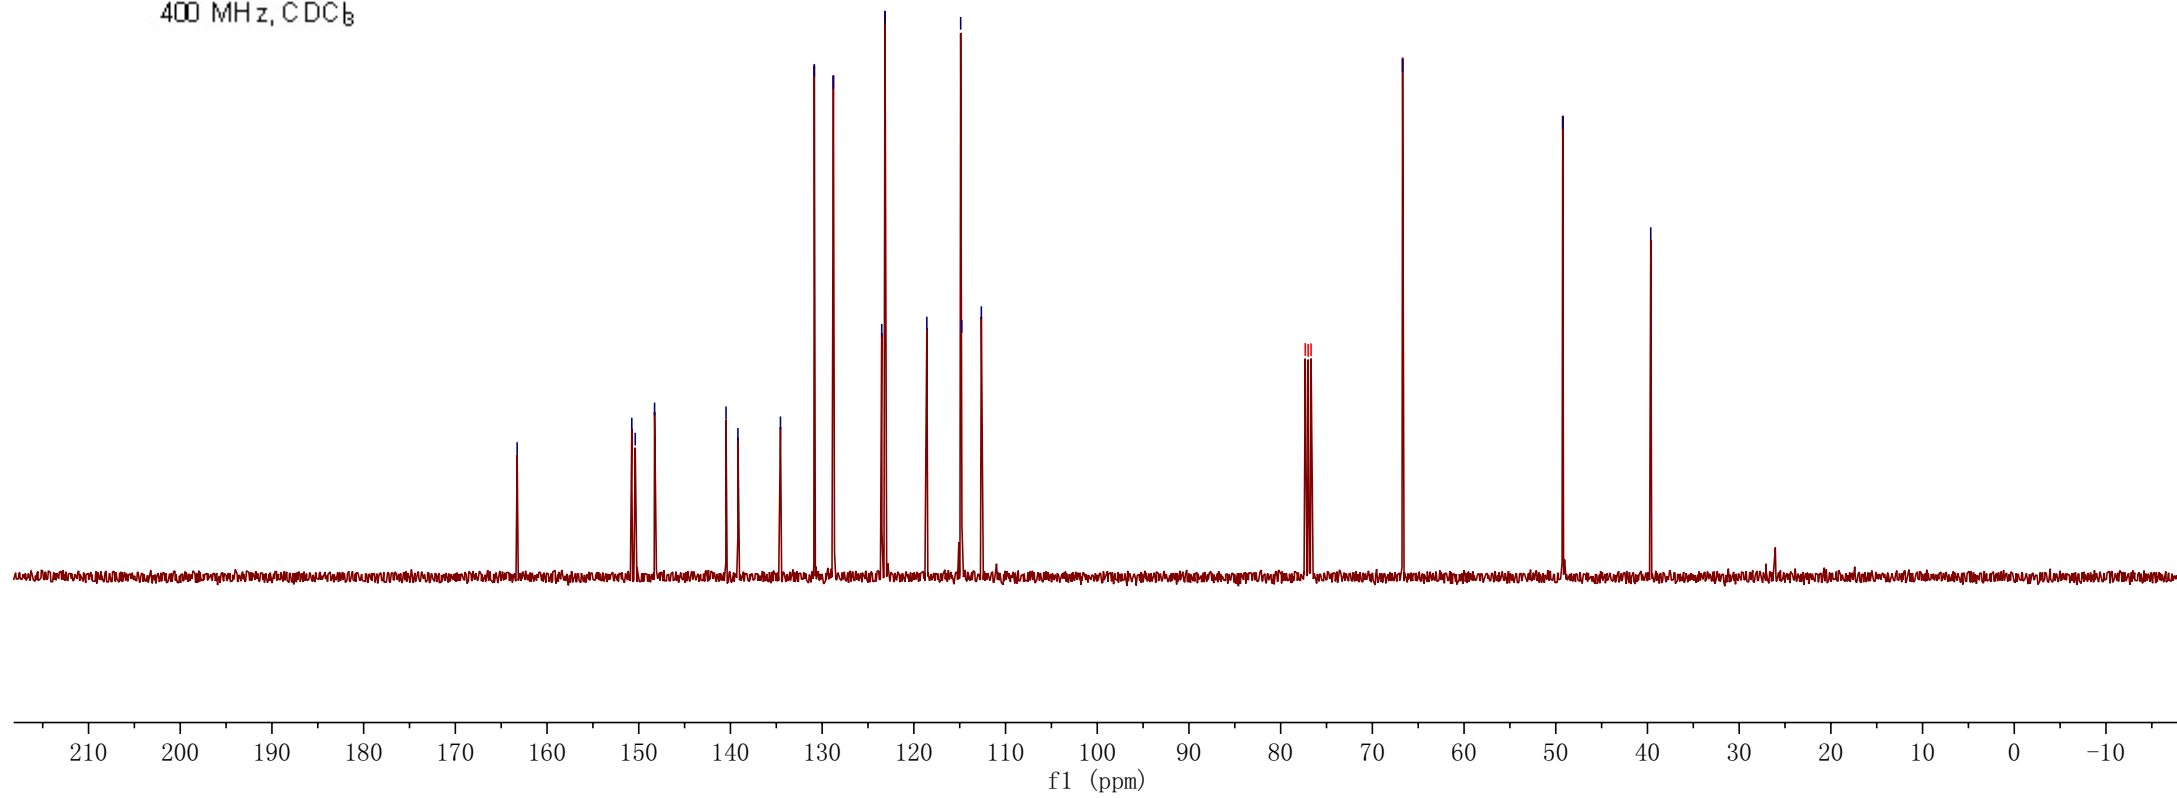

Supplement: d1qo01675j2.pdf [file d1qo01675j2.pdf]
